# Supplementary material for: Multitarget synthetic piperates against key drug targets of Alzheimer's and diabetes mellitus
Source: Royal Society of Chemistry journal article supplement (doi:10.1039/d6ra00843g), 2026-03-30

# Compound 12

"bb asaf-i-111a" 2 1 "D:\Asif C13 piperic acid series"  
Asif / Dr, Farzana / ASP-I-111a / DMSO  
BB

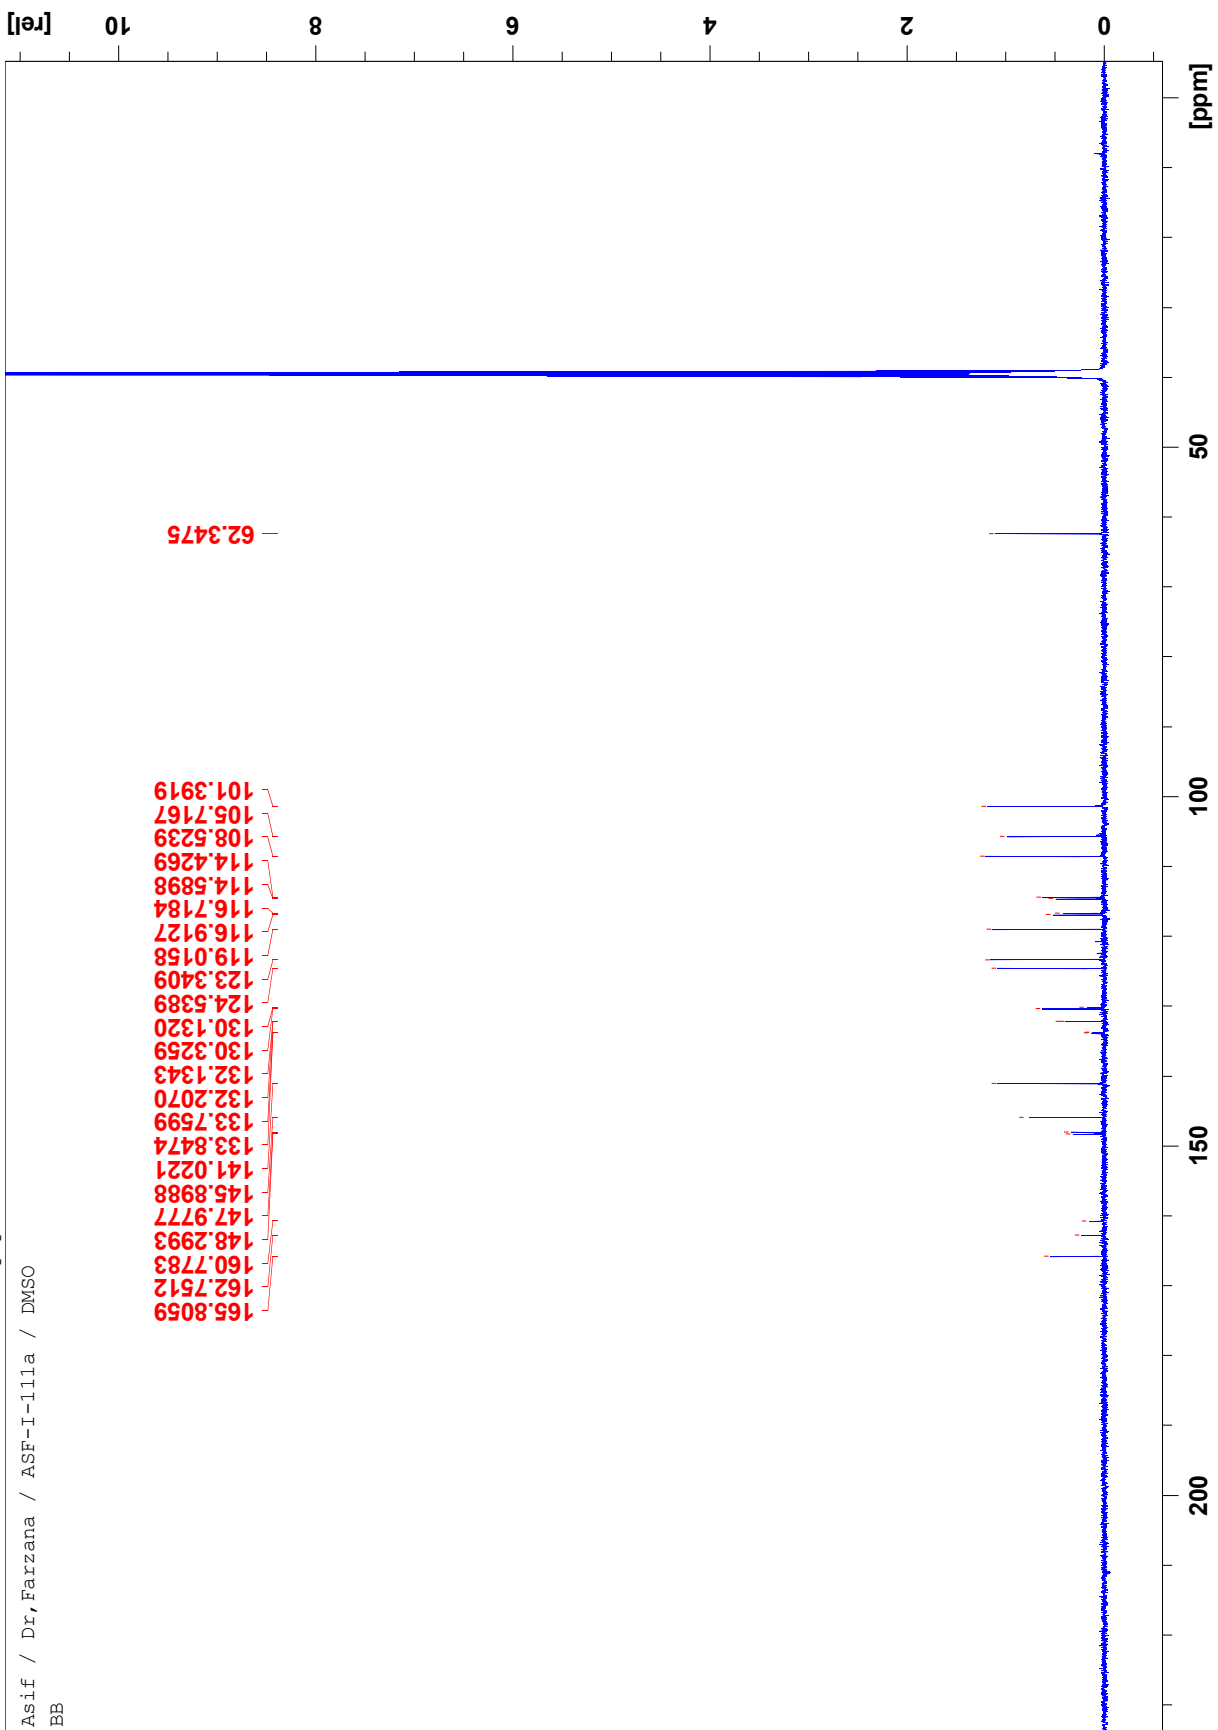

# Compound 12

"dept-90 asf-i-111a" 4 1 "D:\Asif C13 piperinic acid series"

Asif / Dr, Farzana / ASP-I-111a / DMSO  
DEPT90

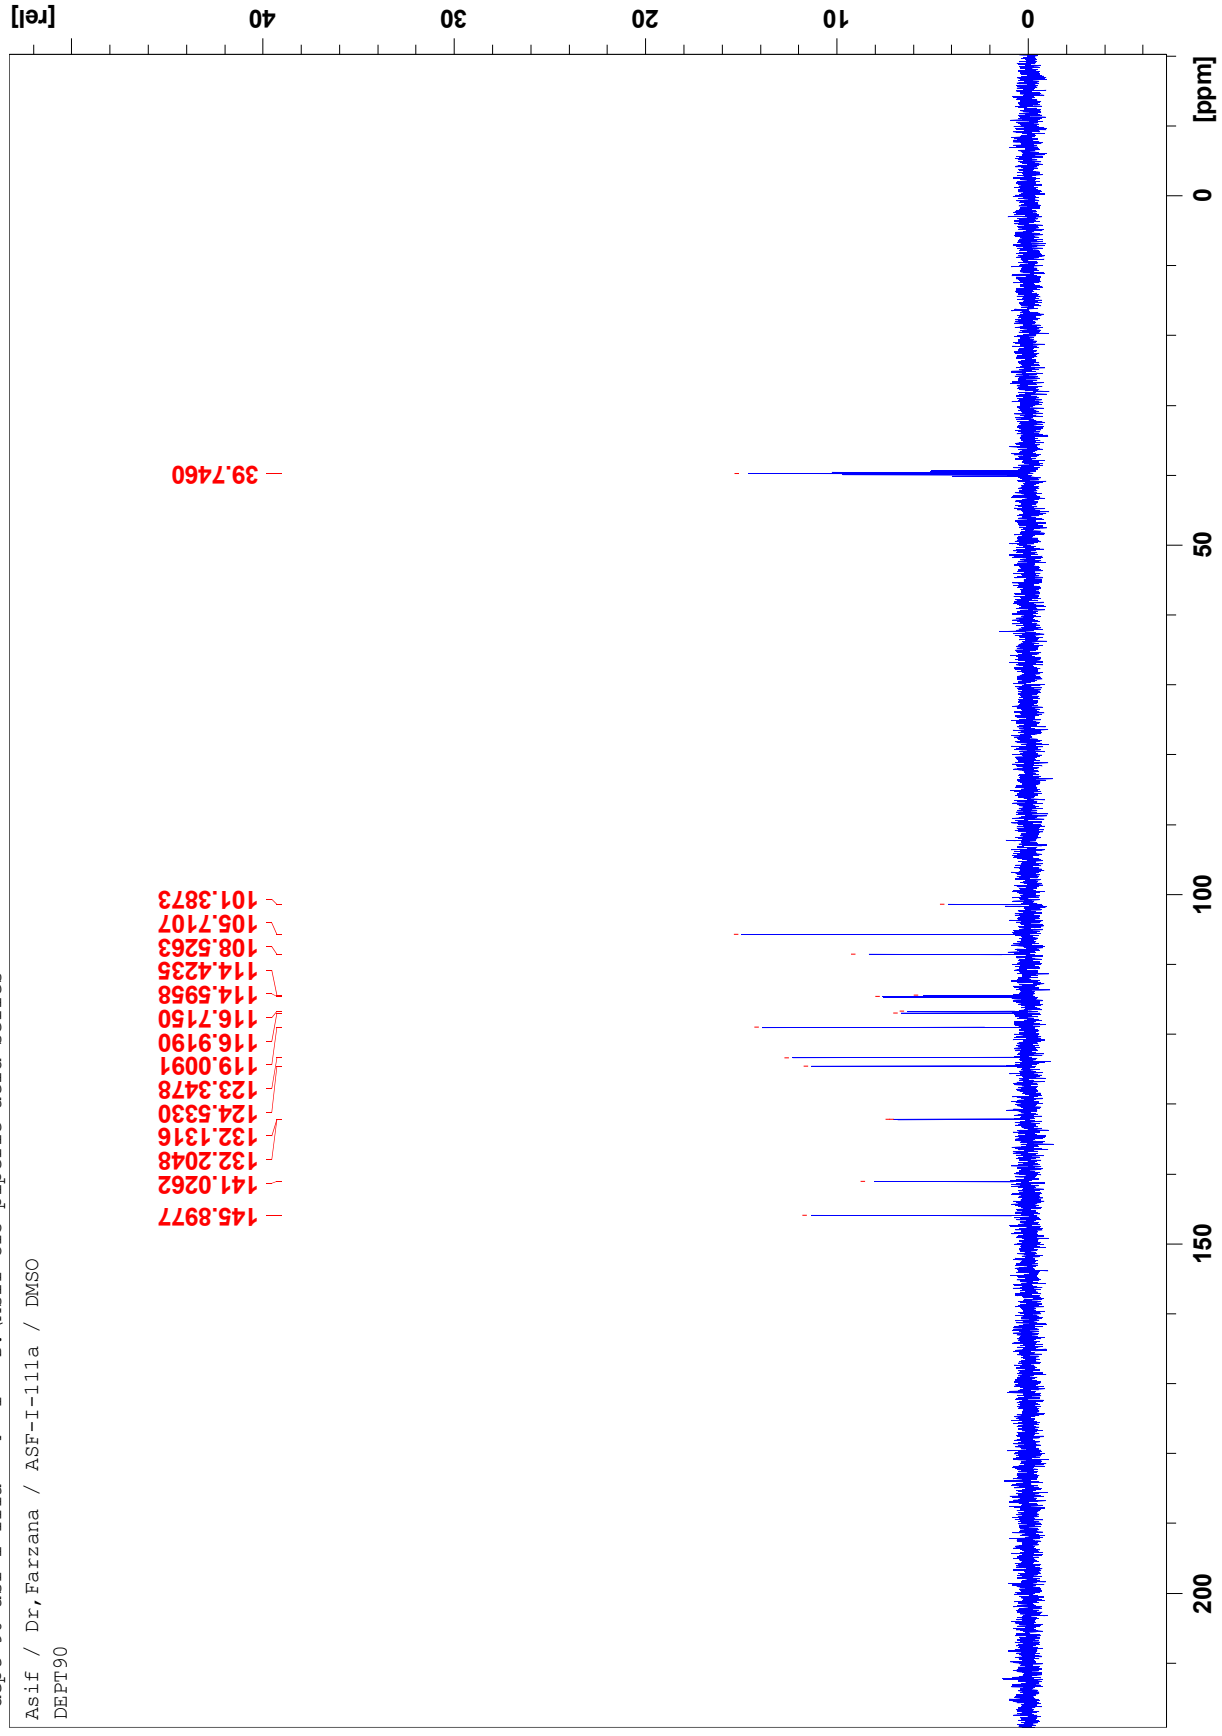

# Compound 12

"dept-135 asf-i-111a" 3 1 "D:\Asif C13 piperic acid series"  
Asif / Dr, Farzana / ASP-I-111a / DMSO  
DEPT135

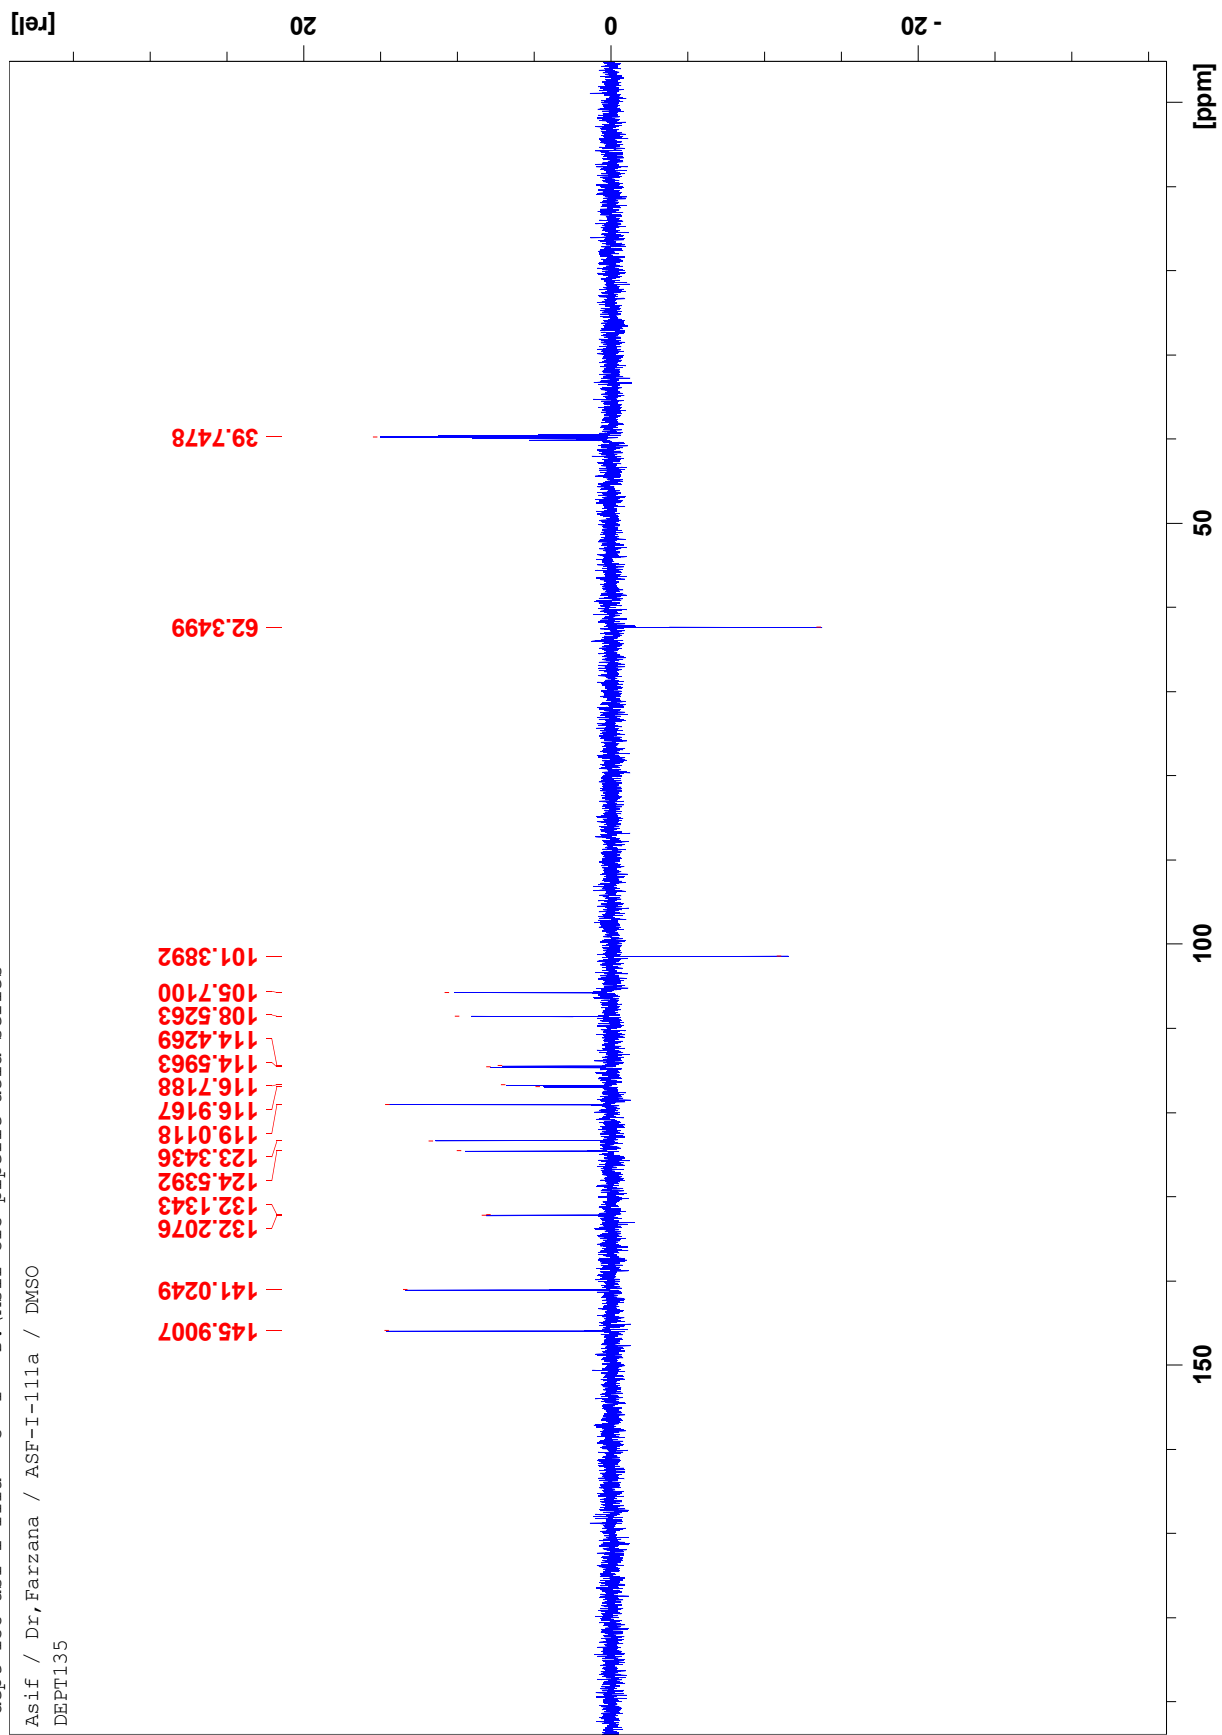

# Compound 13

asf-i-109a 2 1 "D:\Asif C13 piperinic acid series"

Asif / Dr, Farzana / ASF-I-109a / DMSO

BB

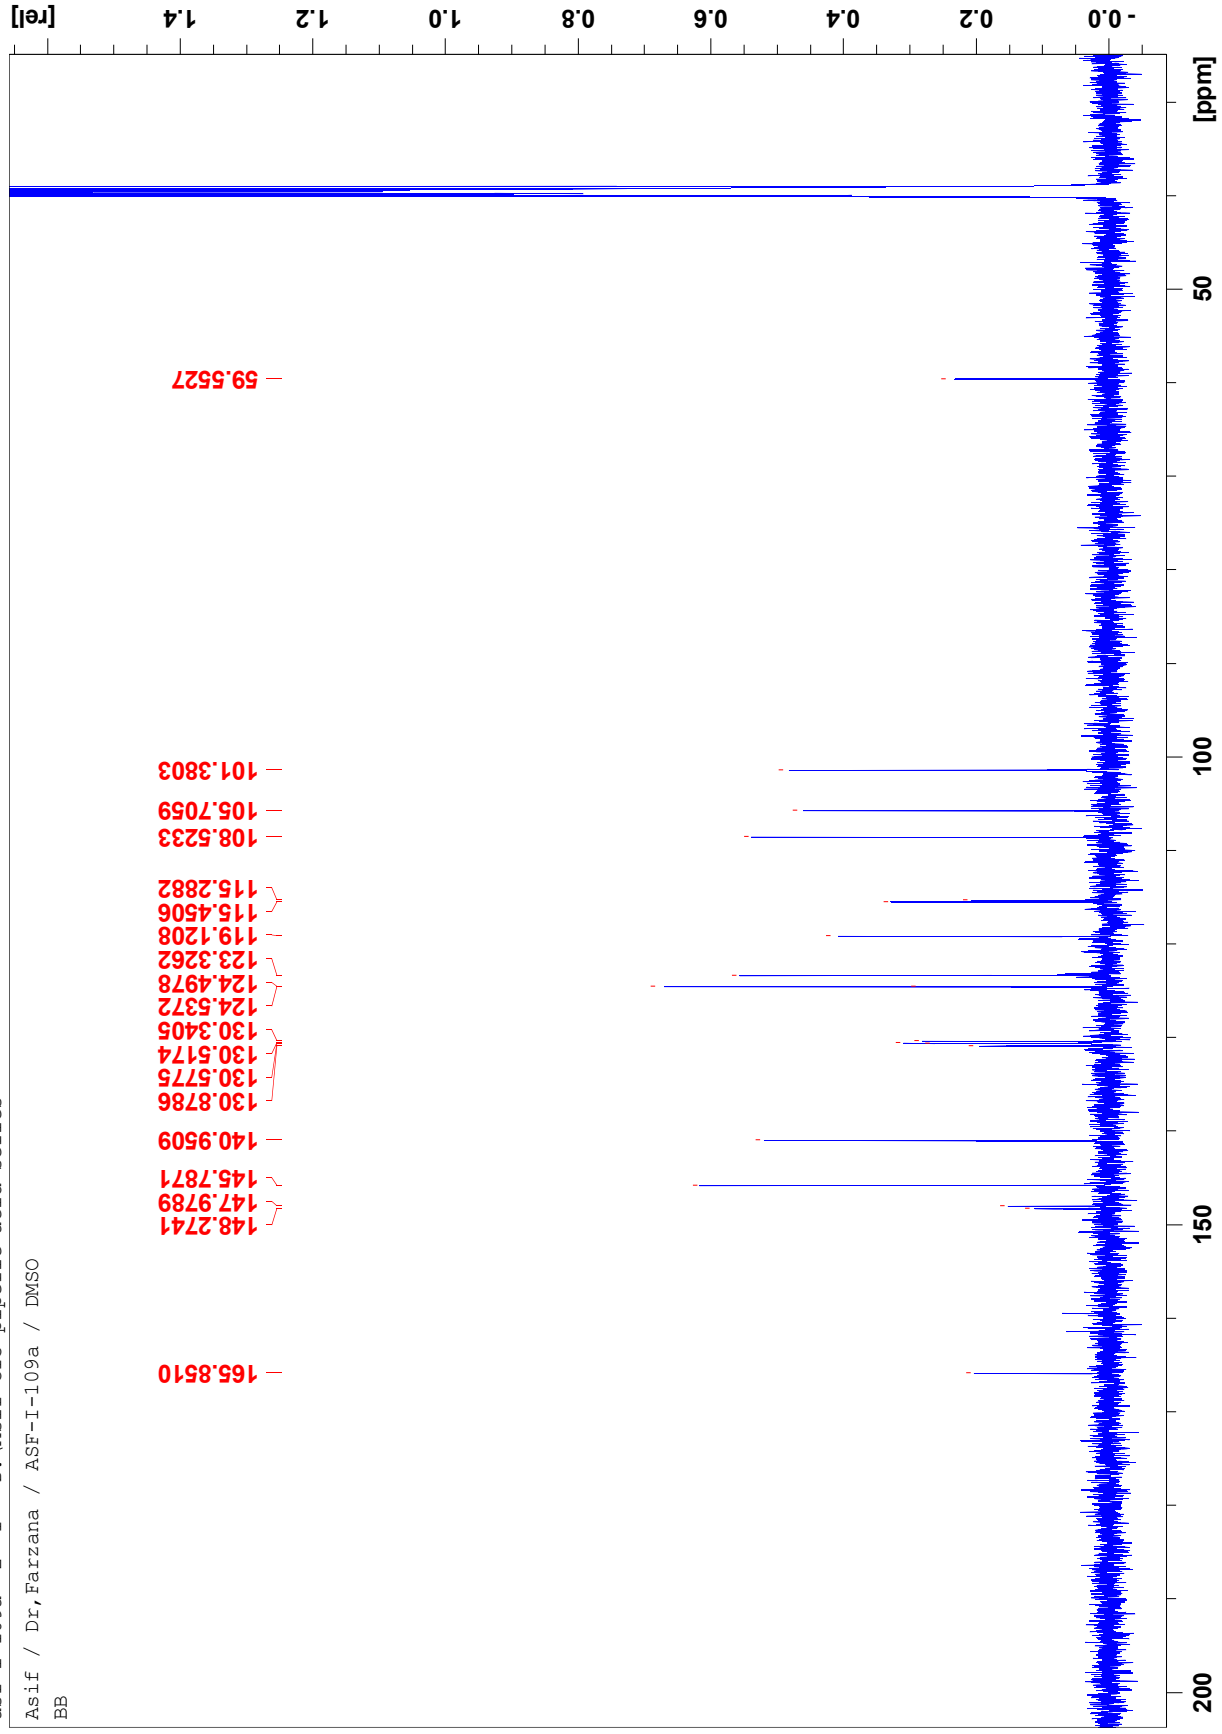

# Compound 13

"dept 90 asf-i-109a" 4 1 "D:\Asif C13 piperic acid series"

Asif / Dr, Farzana / ASP-I-109a / DMSO  
DEPT90

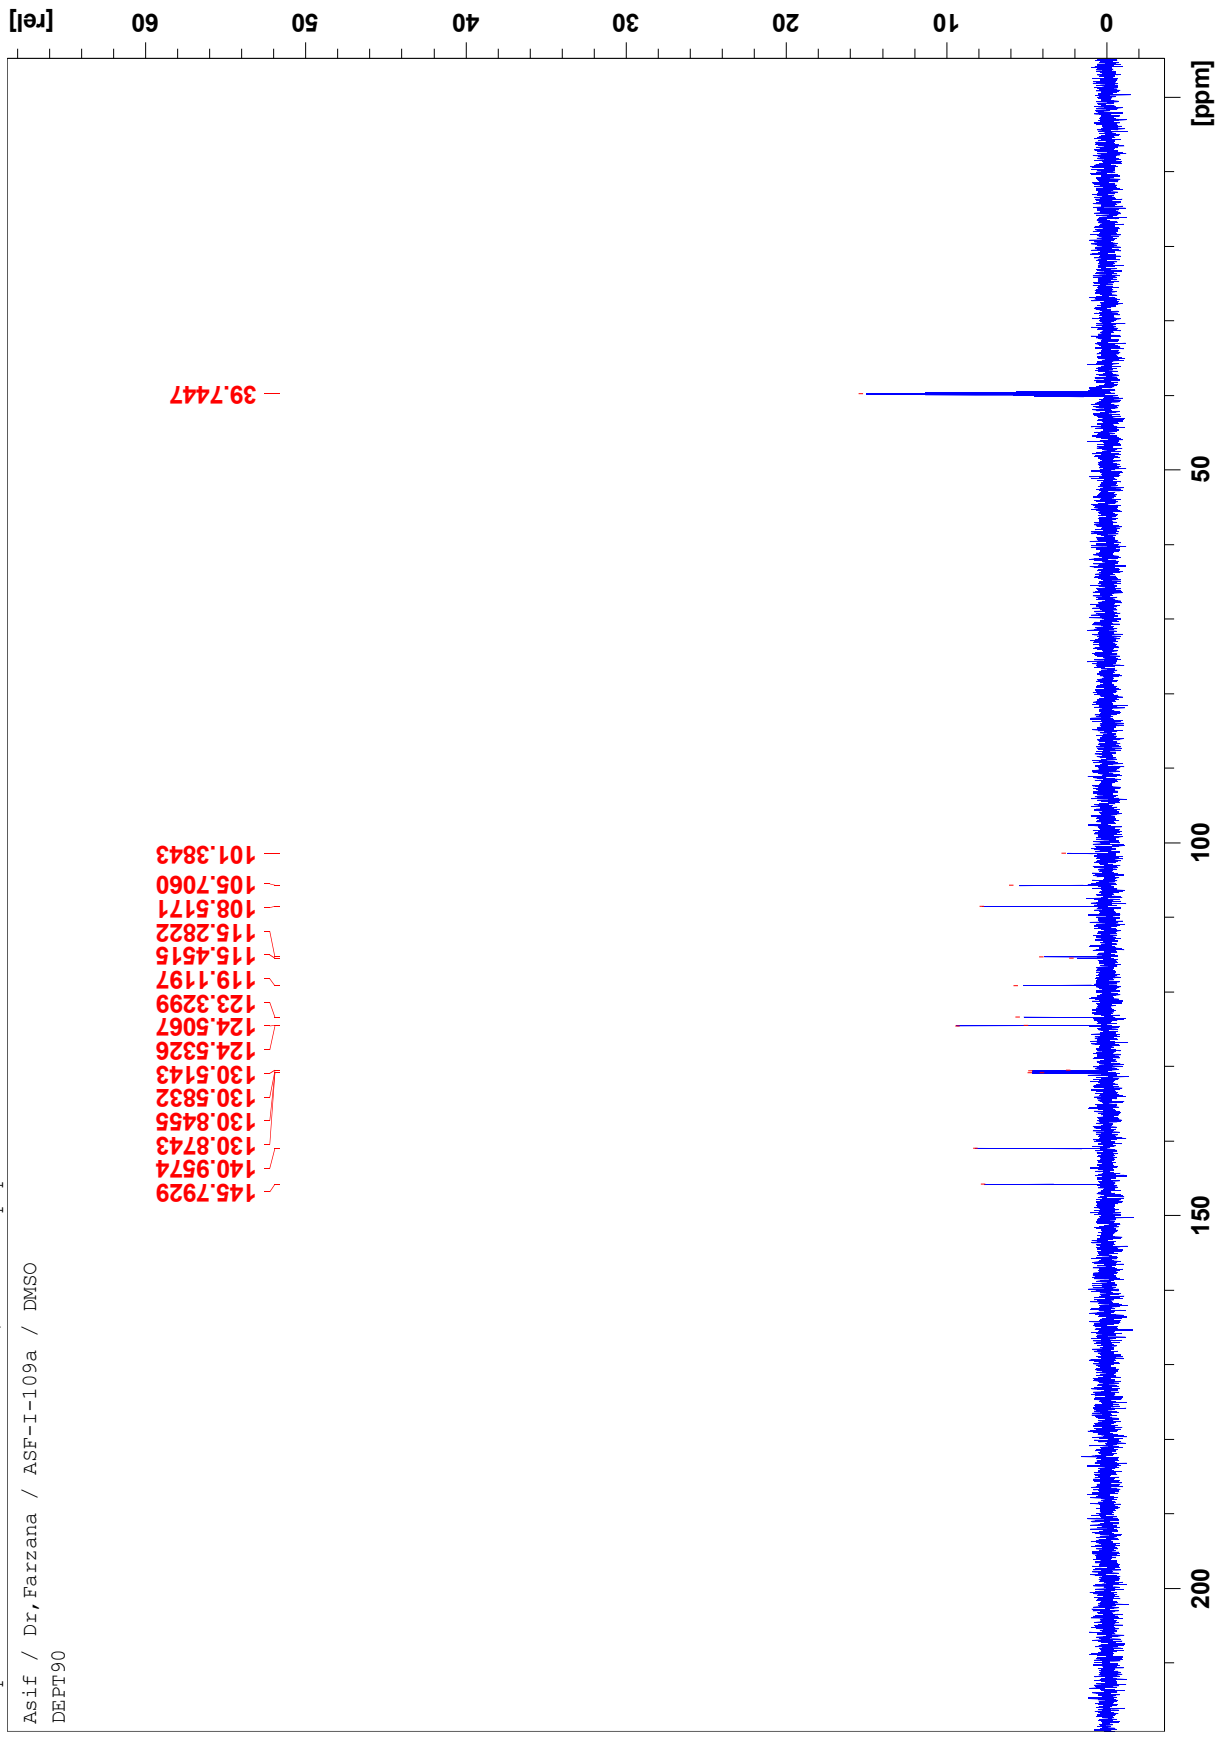

# Compound 13

"asf-i-109a dept 135" 3 1 "D:\Asif C13 piperic acid series"  
Asif / Dr, Farzana / ASF-I-109a / DMSO  
DEPT135

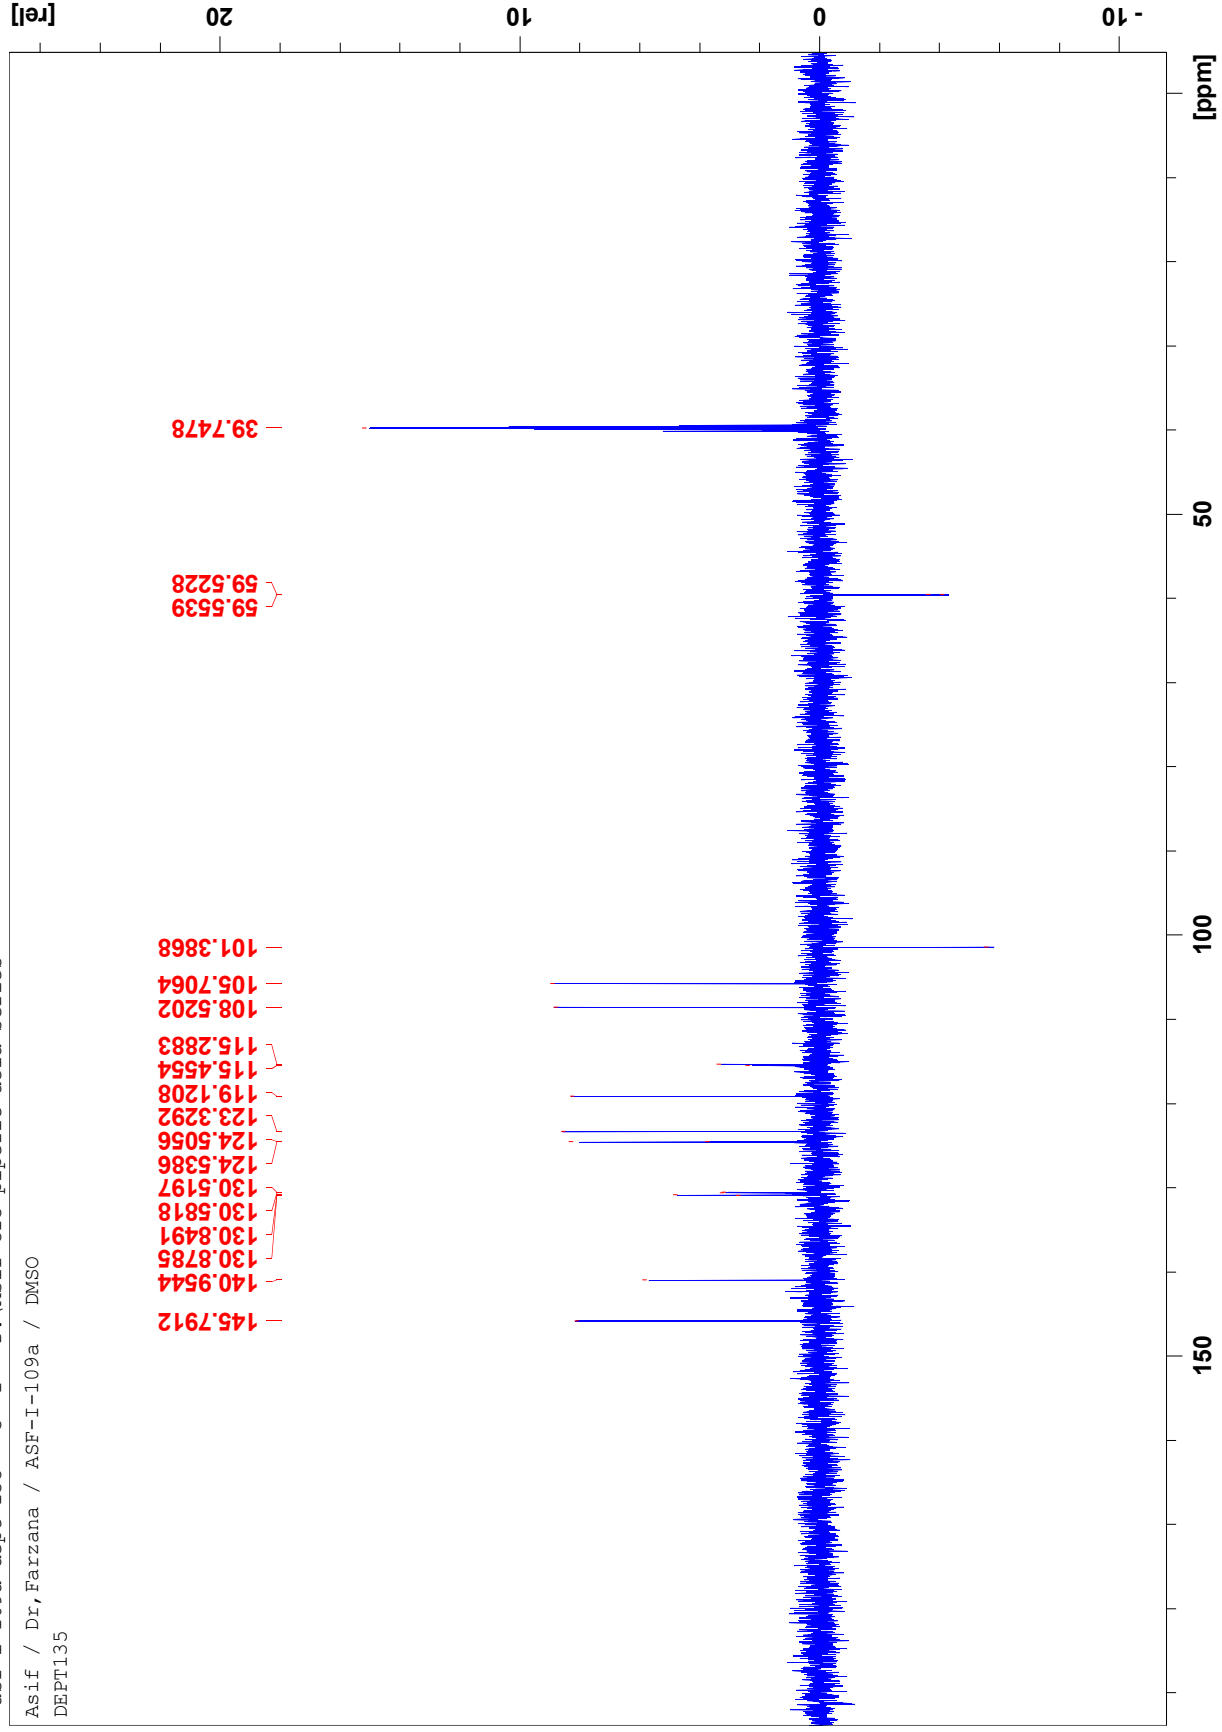

# Compound 18

"asf-i-145a bb" 1 1 "D:\Asif C13 piperic acid series"

Asif / Dr, Farzana / ASF-I-145a / DMSO

BB

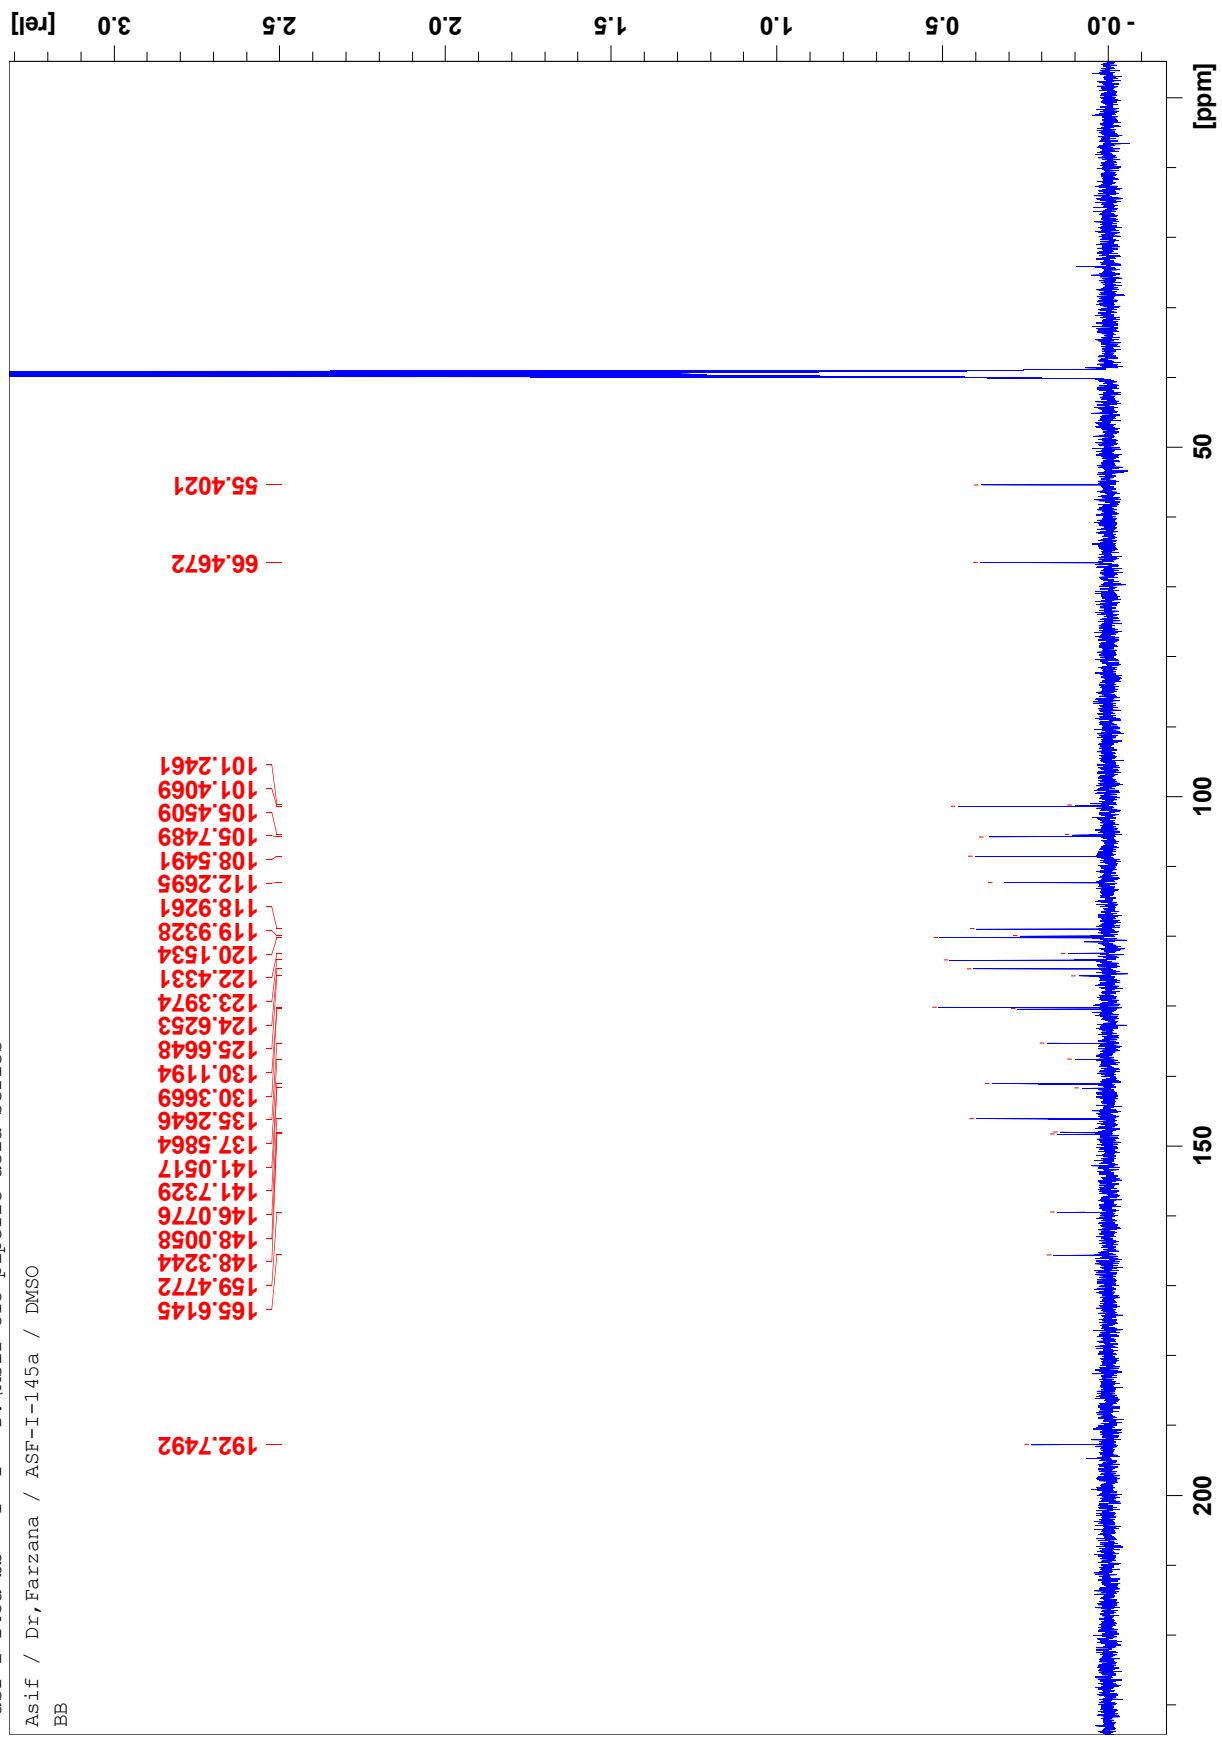

# Compound 18

"asf-i-145a dept 90" 3 1 "D:\Asif C13 piperic acid series"  
Asif / Dr, Farzana / ASF-I-145a / DMSO  
DEPT90

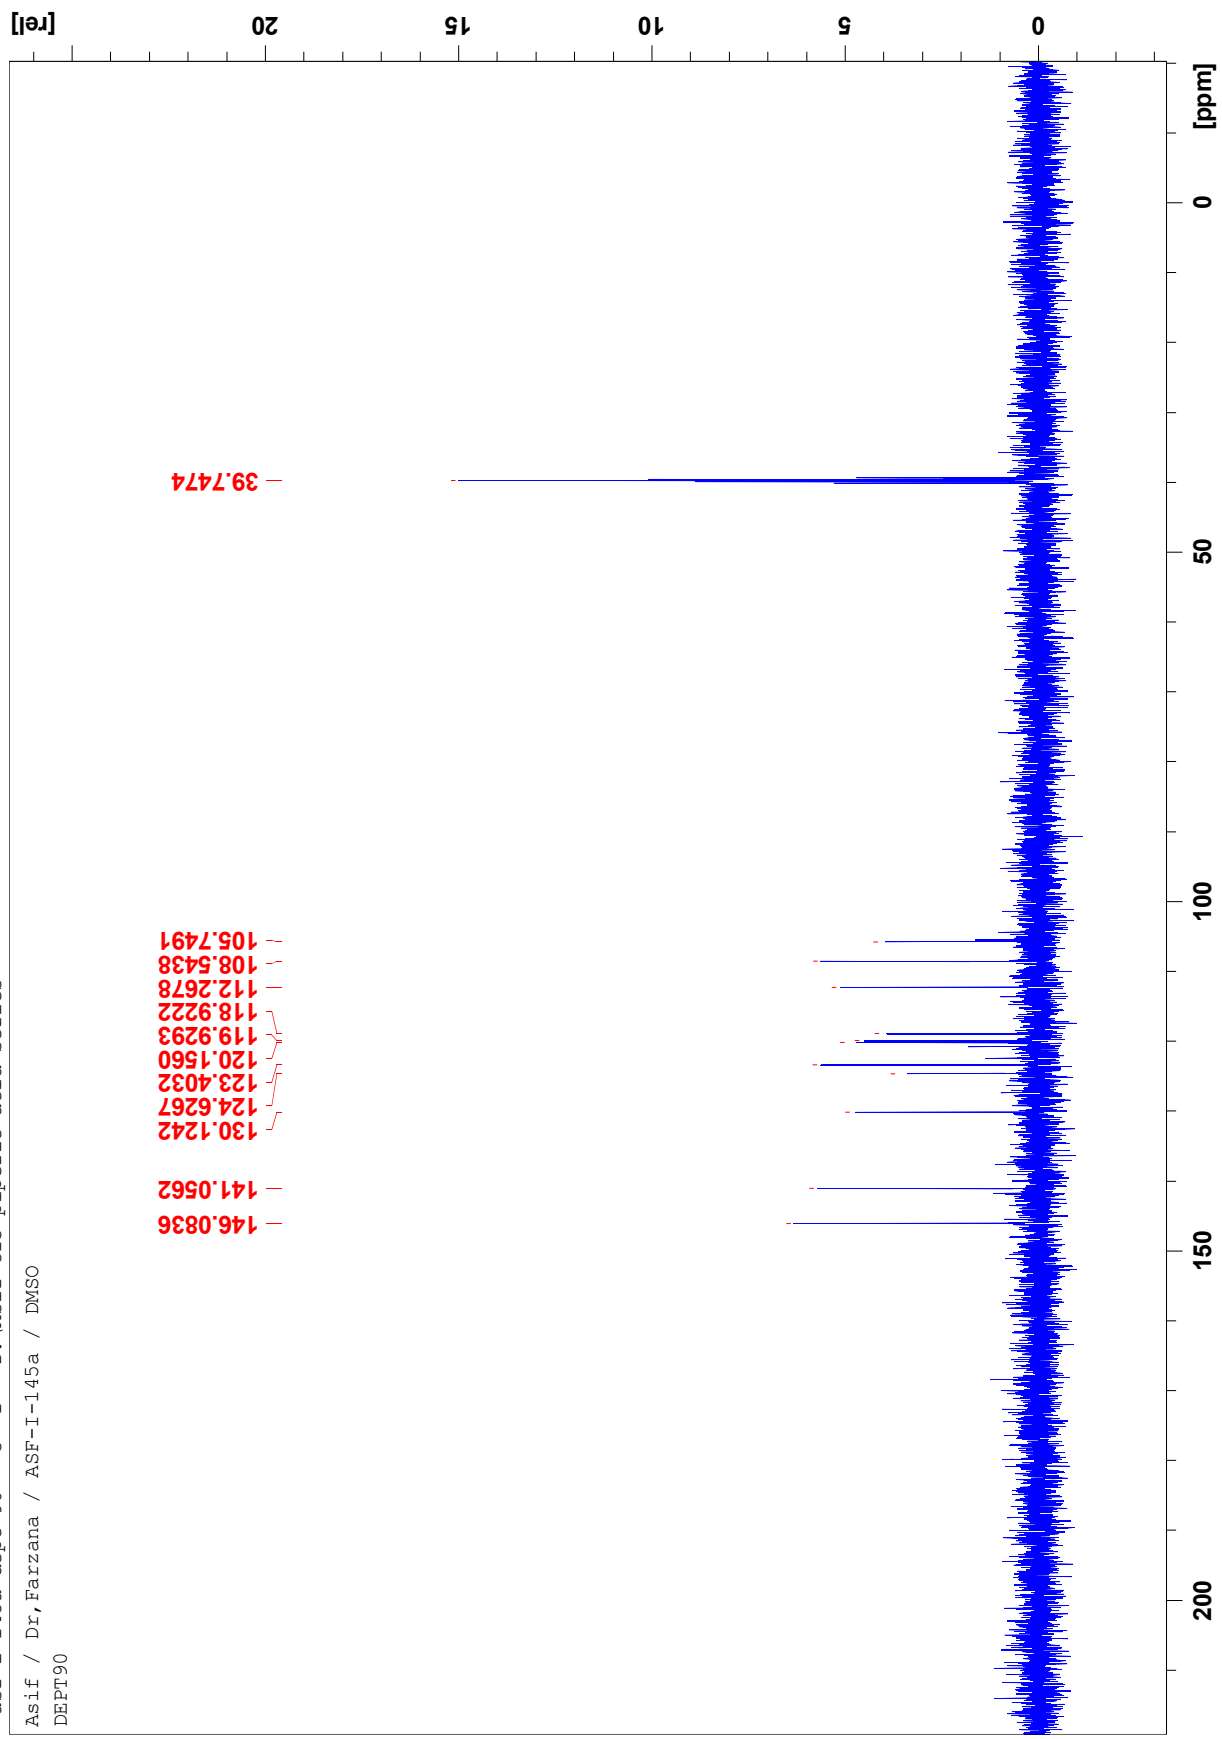

# Compound 18

"asf-i-145a dept-135" 2 1 "D:\Asif C13 piperic acid series"

Asif / Dr, Farzana / ASP-I-145a / DMSO  
DEPT135

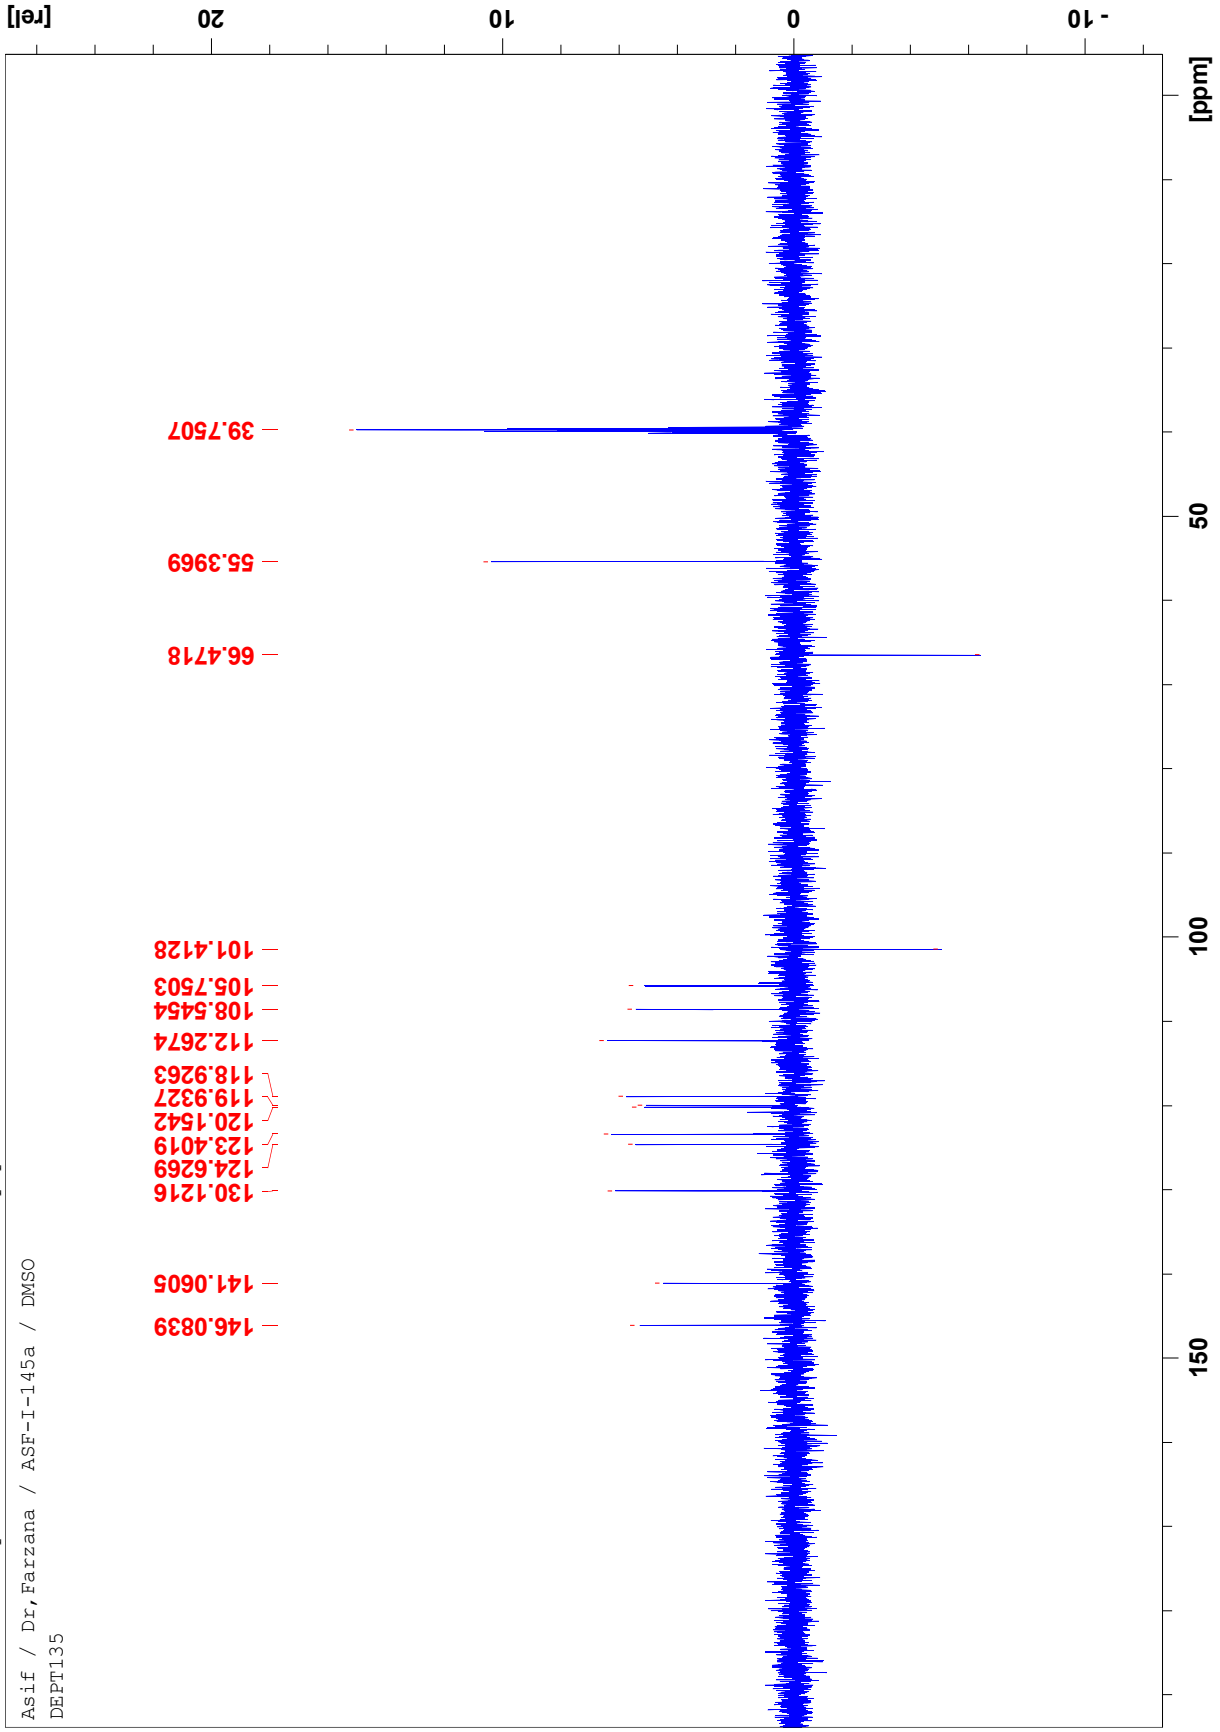

# Compound 19

asf-i-153a 2 1 "D:\Asif C13 piperinic acid series"

Asif / Dr, Farzana / ASF-I-153a / DMSO

BB

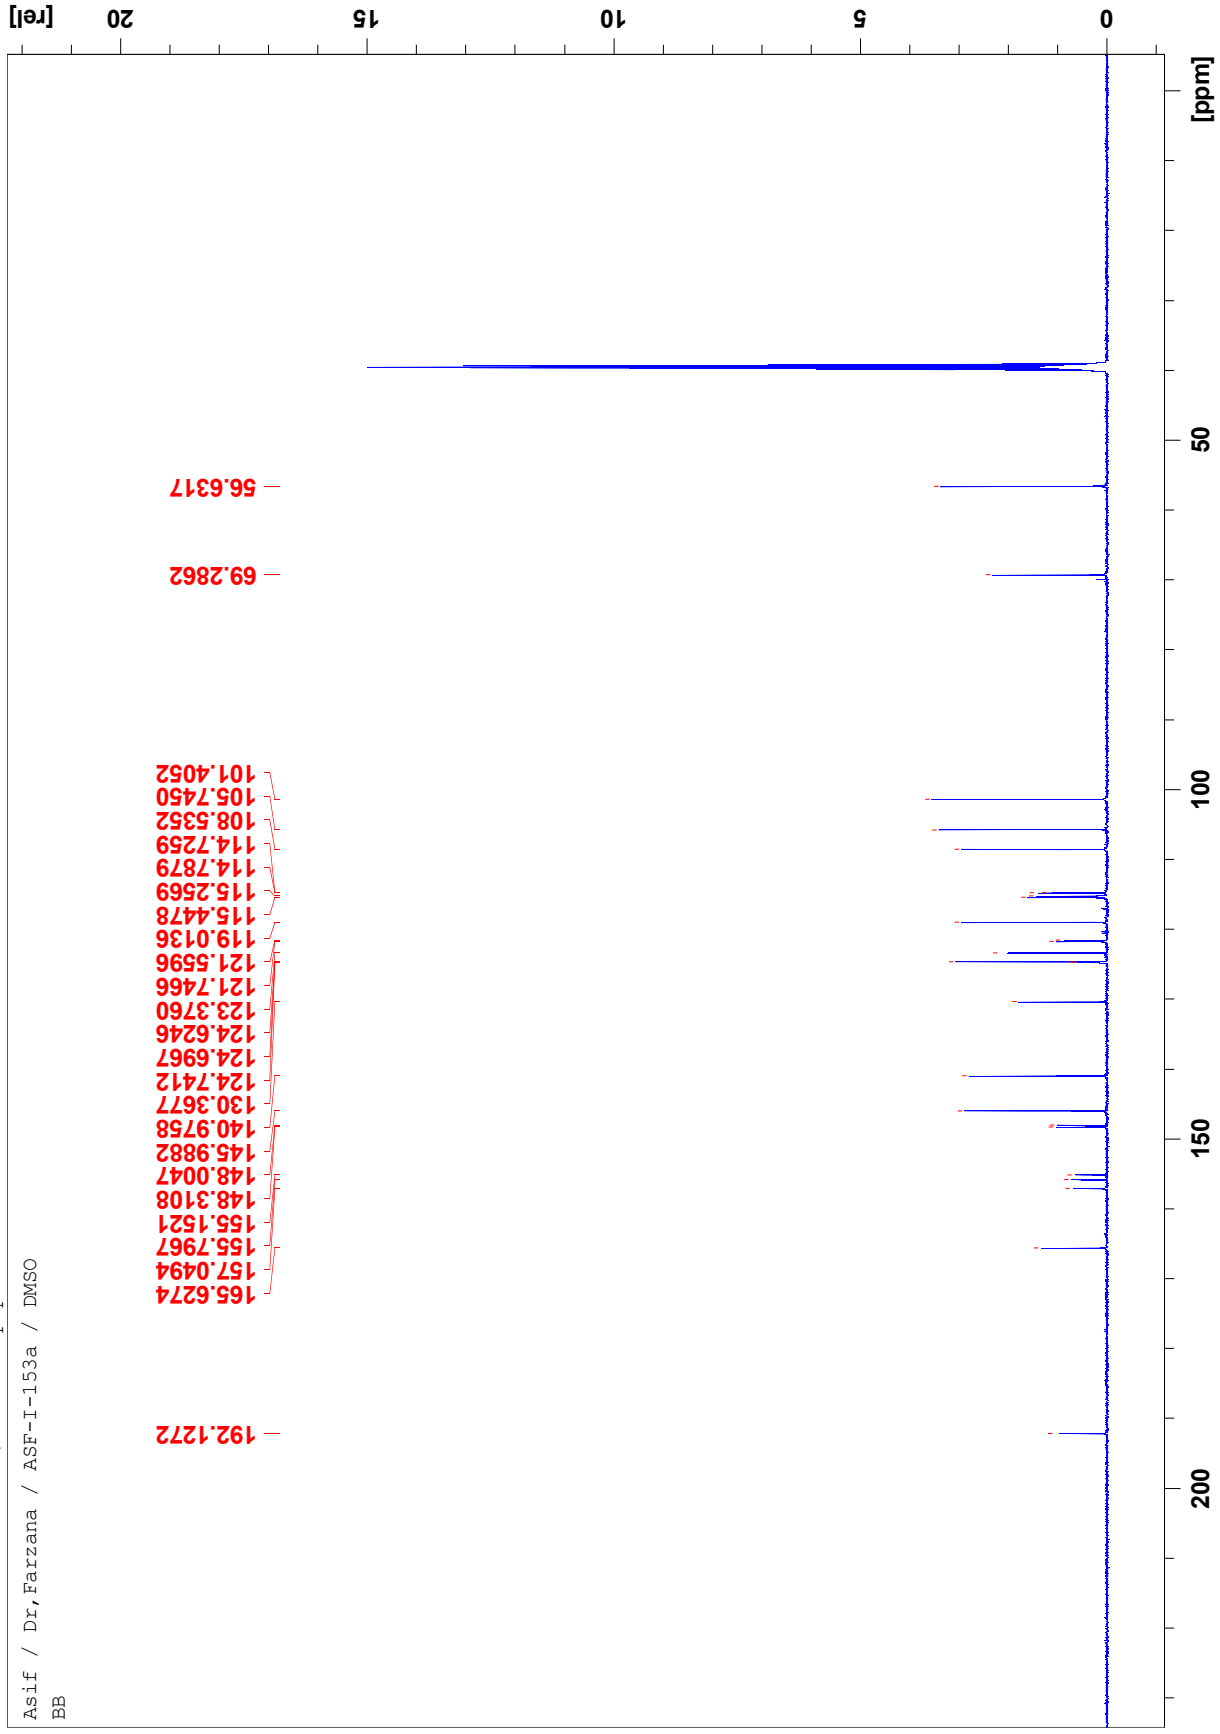

# Compound 19

asf-i-153a 4 1 "D:\Asif C13 piperinic acid series"

Asif / Dr, Farzana / ASF-I-153a / DMSO

DEPT90

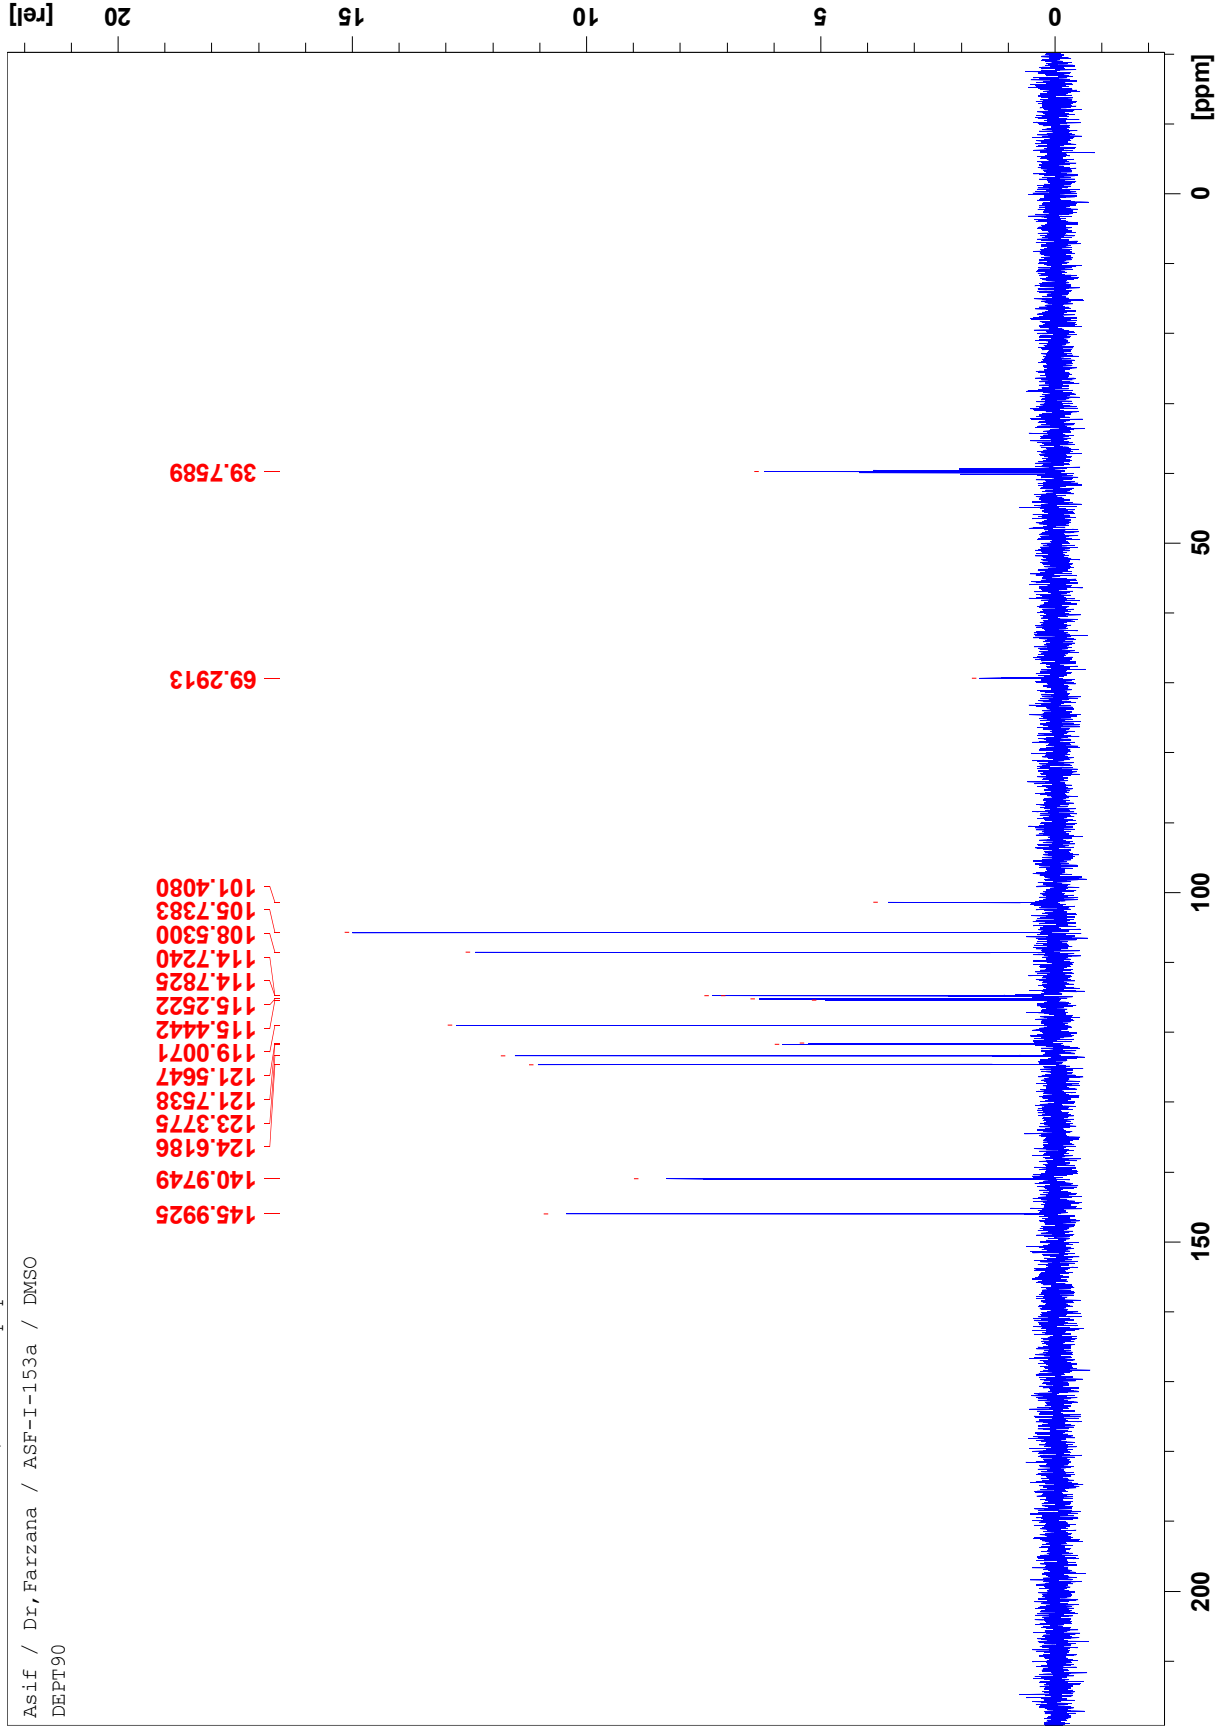

# Compound 19

asf-i-153a 3 1 "D:\Asif C13 piperic acid series"

Asif / Dr, Farzana / ASP-I-153a / DMSO

DEPT135

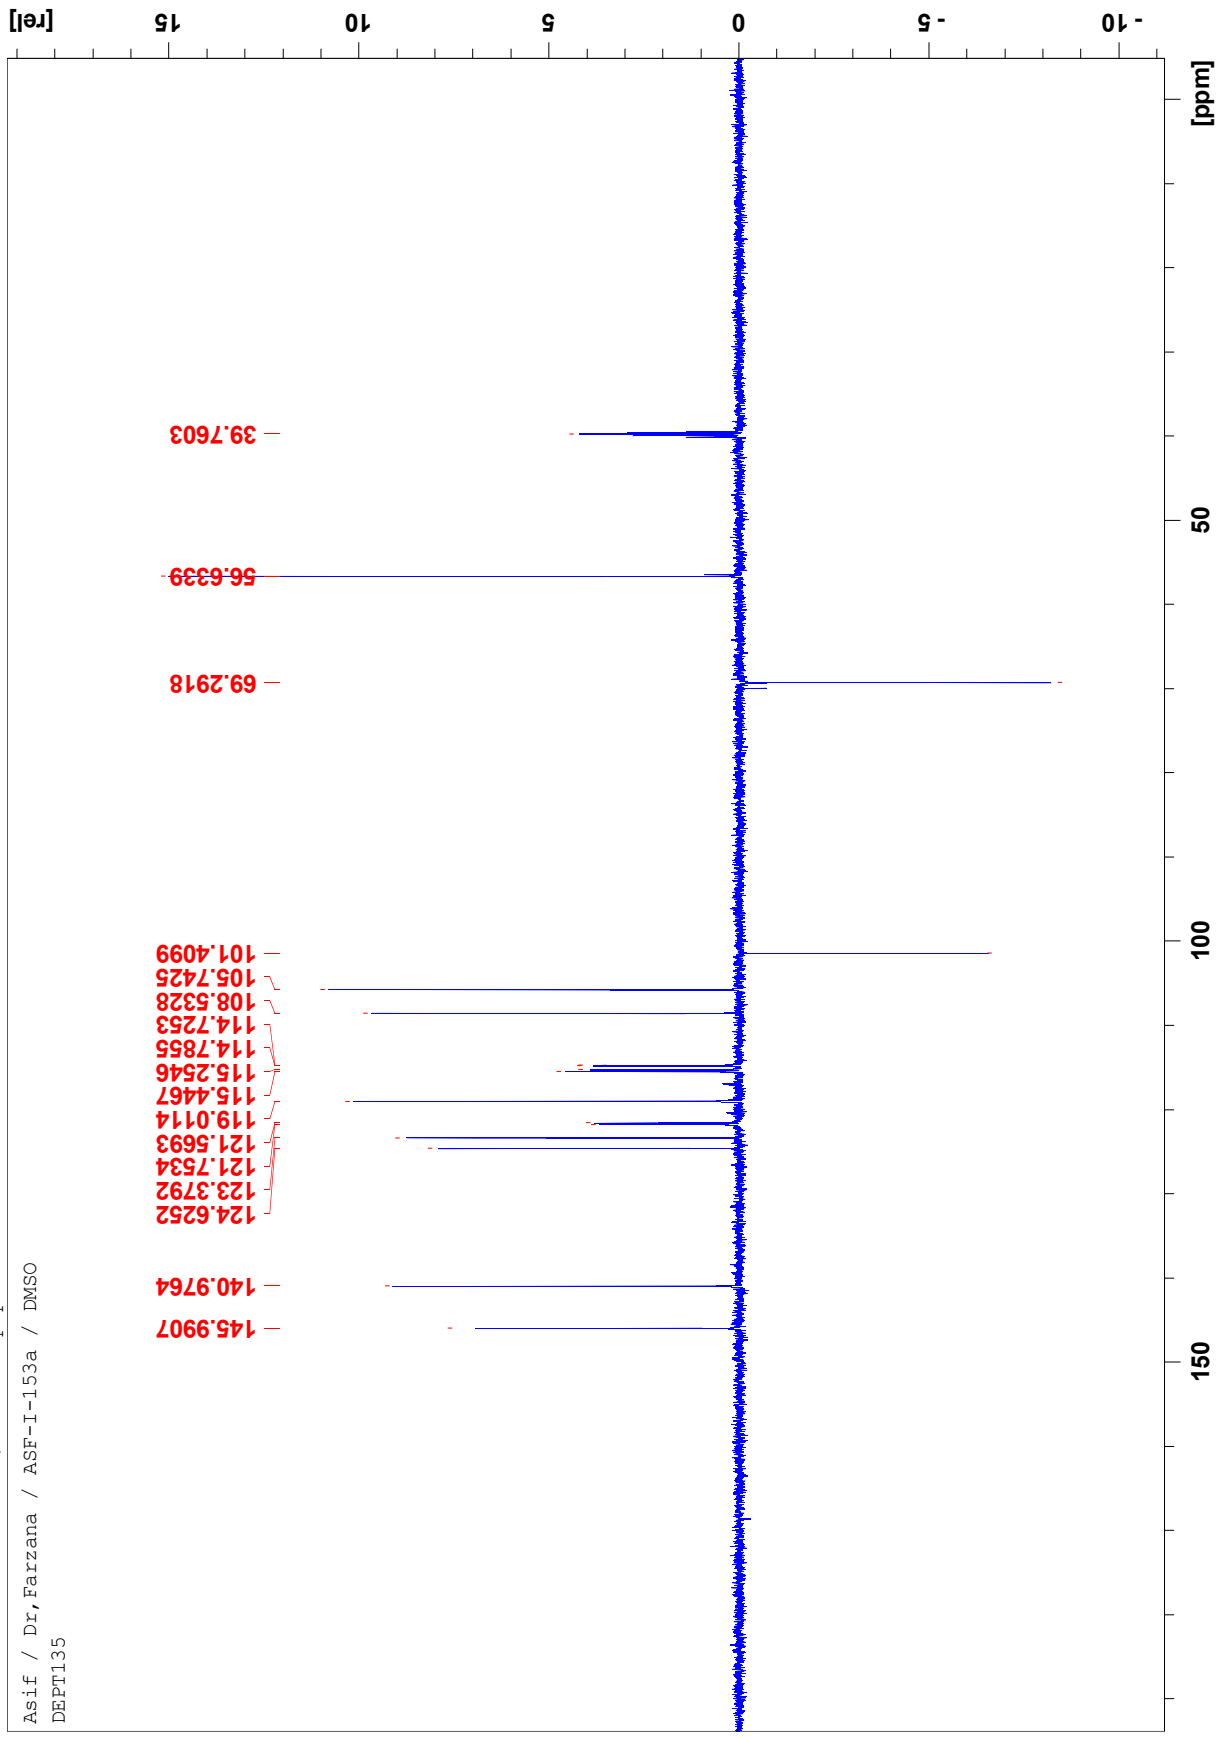

# Compound 21

"asf-i-155a bb" 2 1 "D:\Asif C13 piperic acid series"

Asif / Dr, Farzana / ASF-I-155a / DMSO

BB

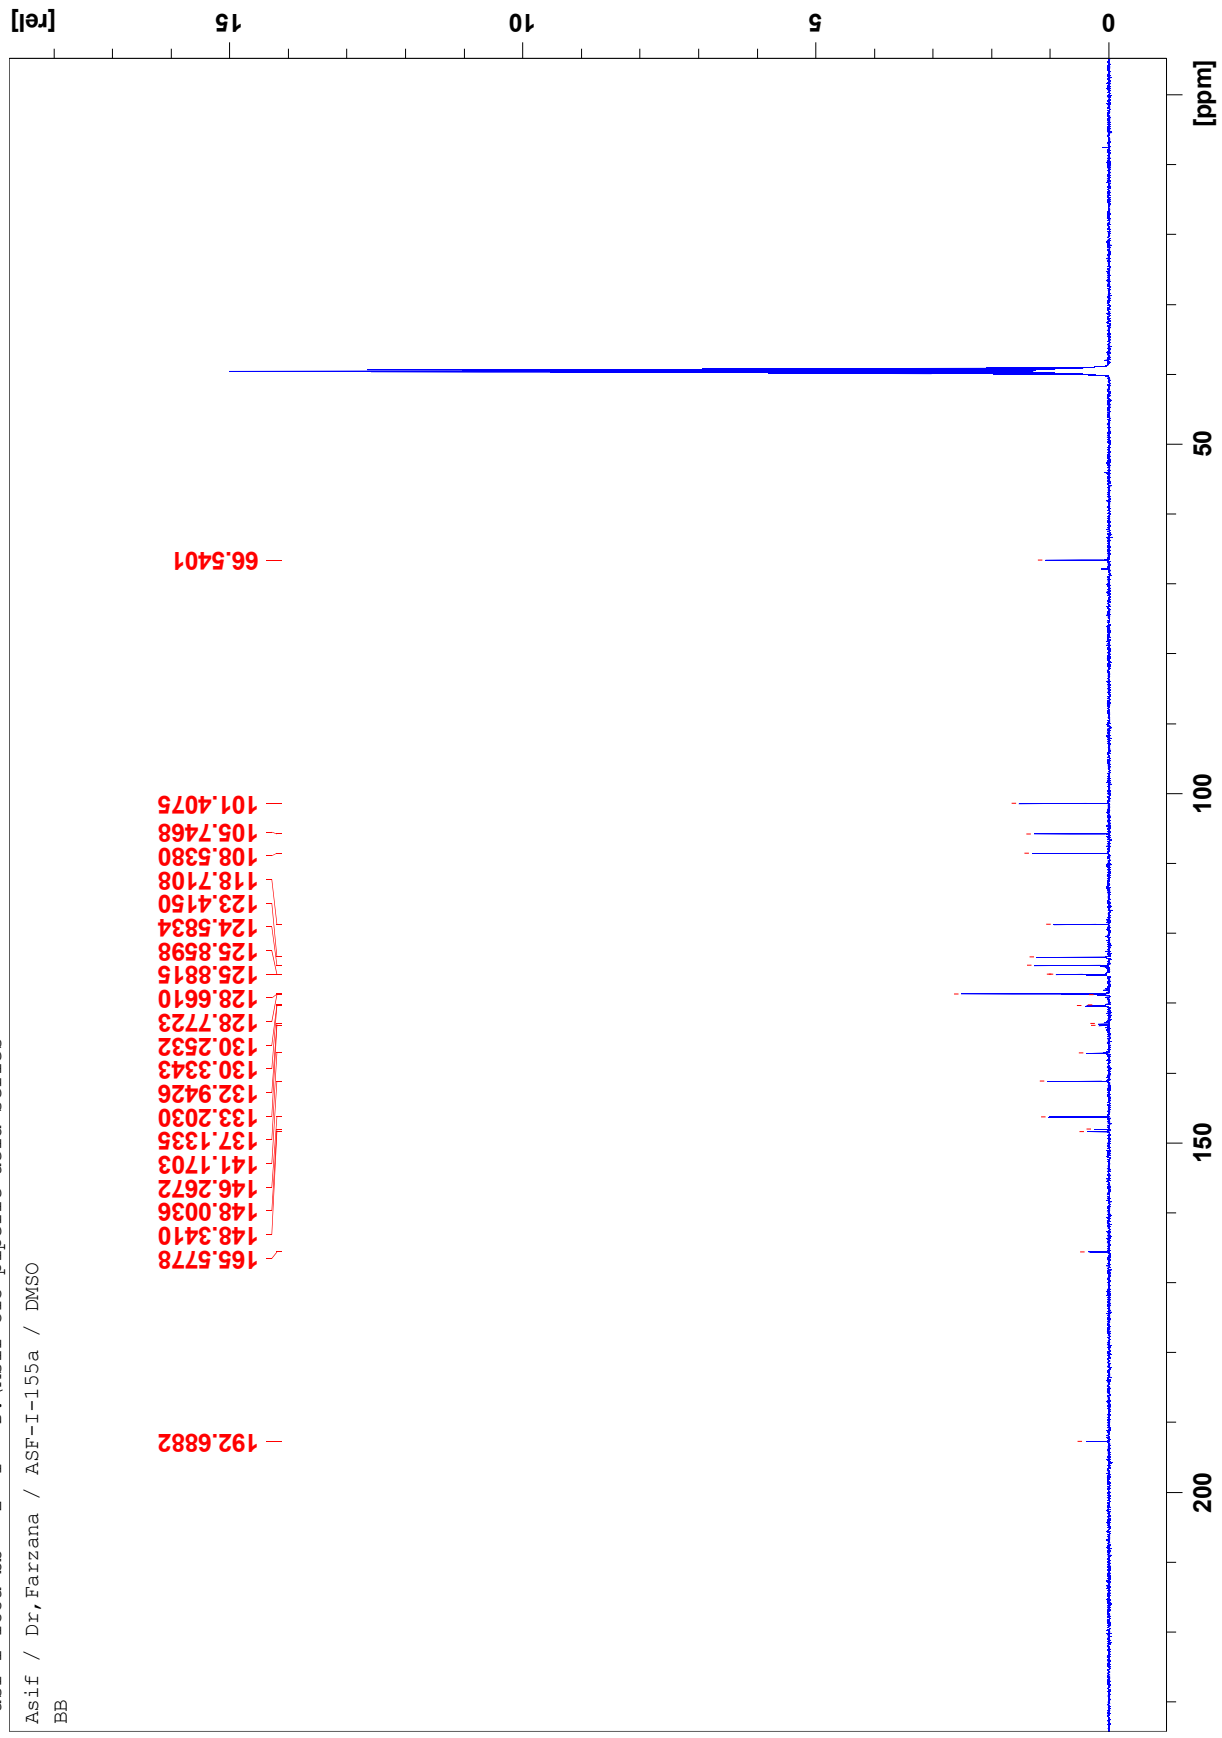

# Compound 21

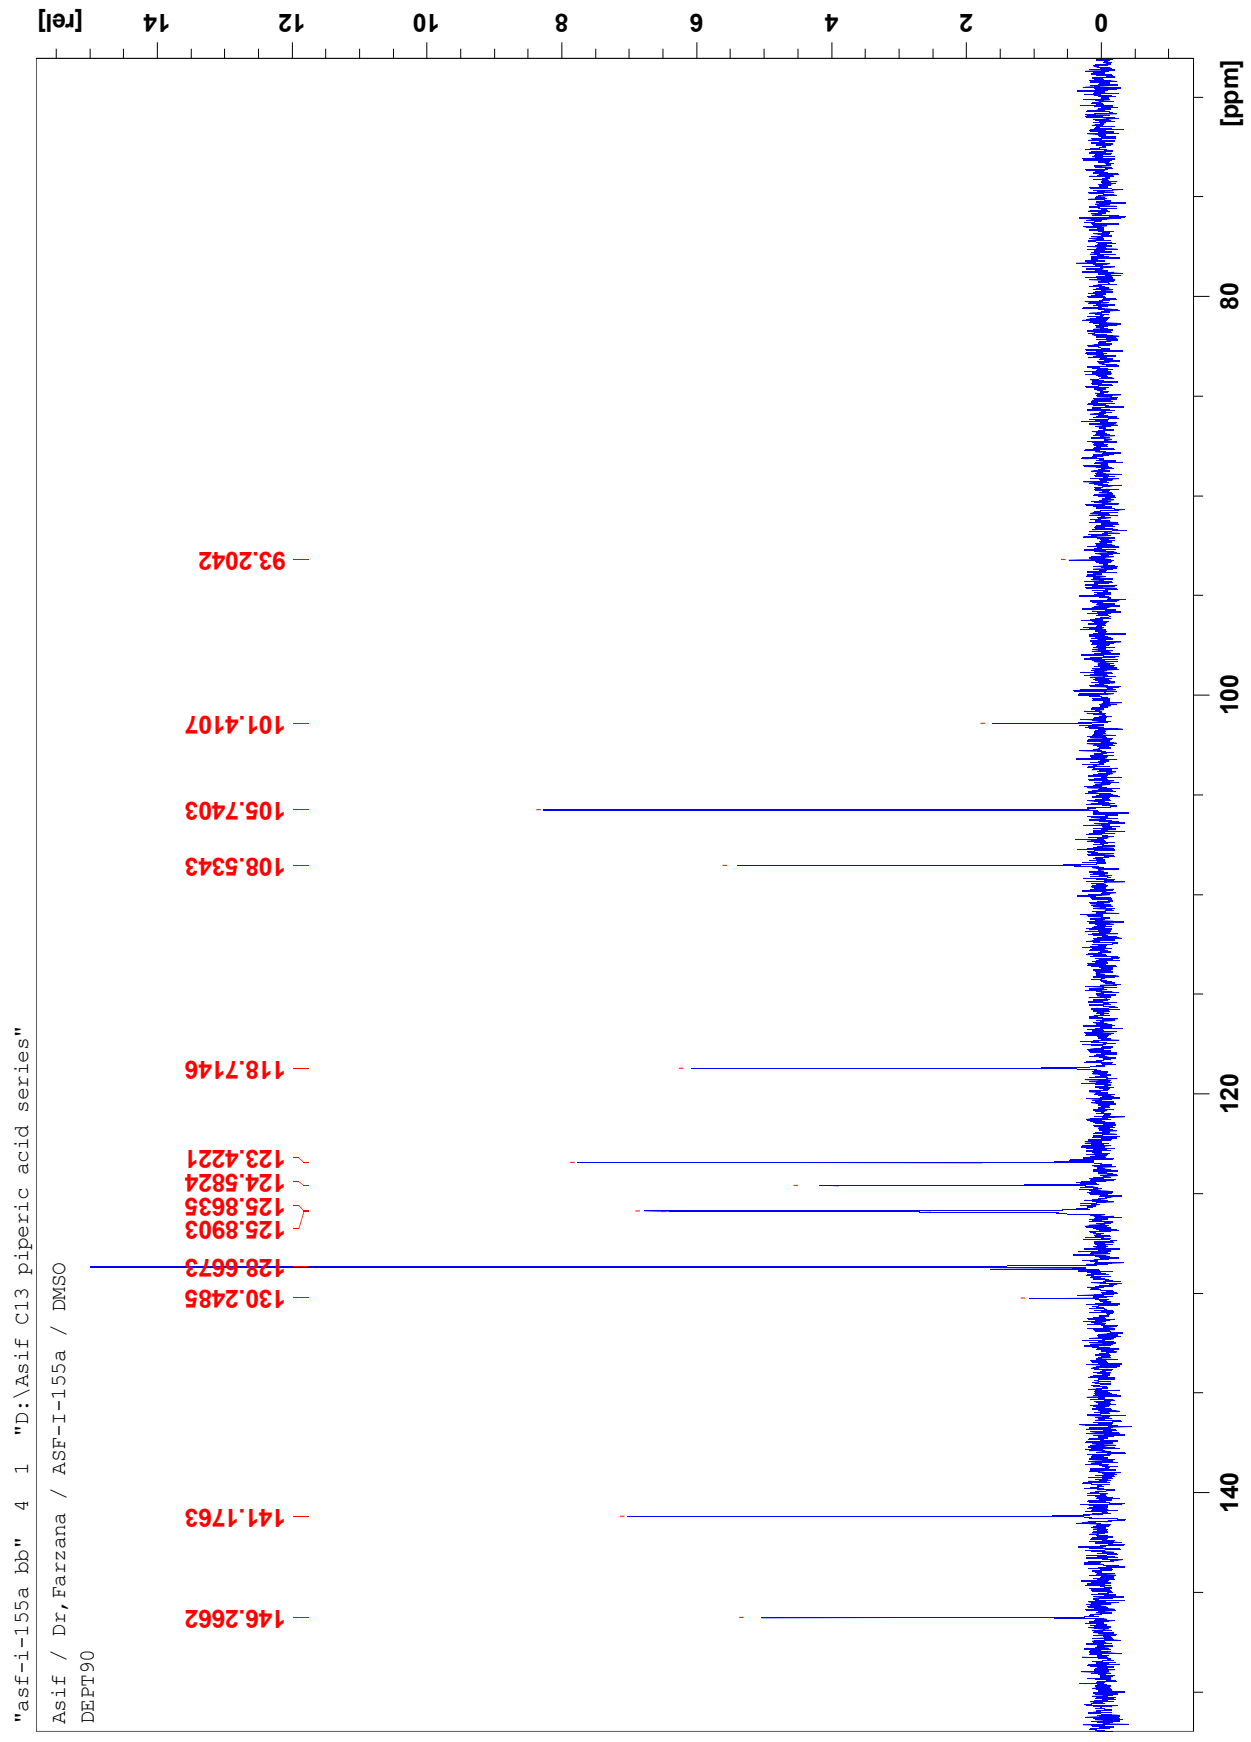

# Compound 21

"asf-i-155a bb" 3 1 "D:\Asif C13 piperic acid series"  
Asif / Dr, Farzana / ASP-I-155a / DMSO  
DEPT135

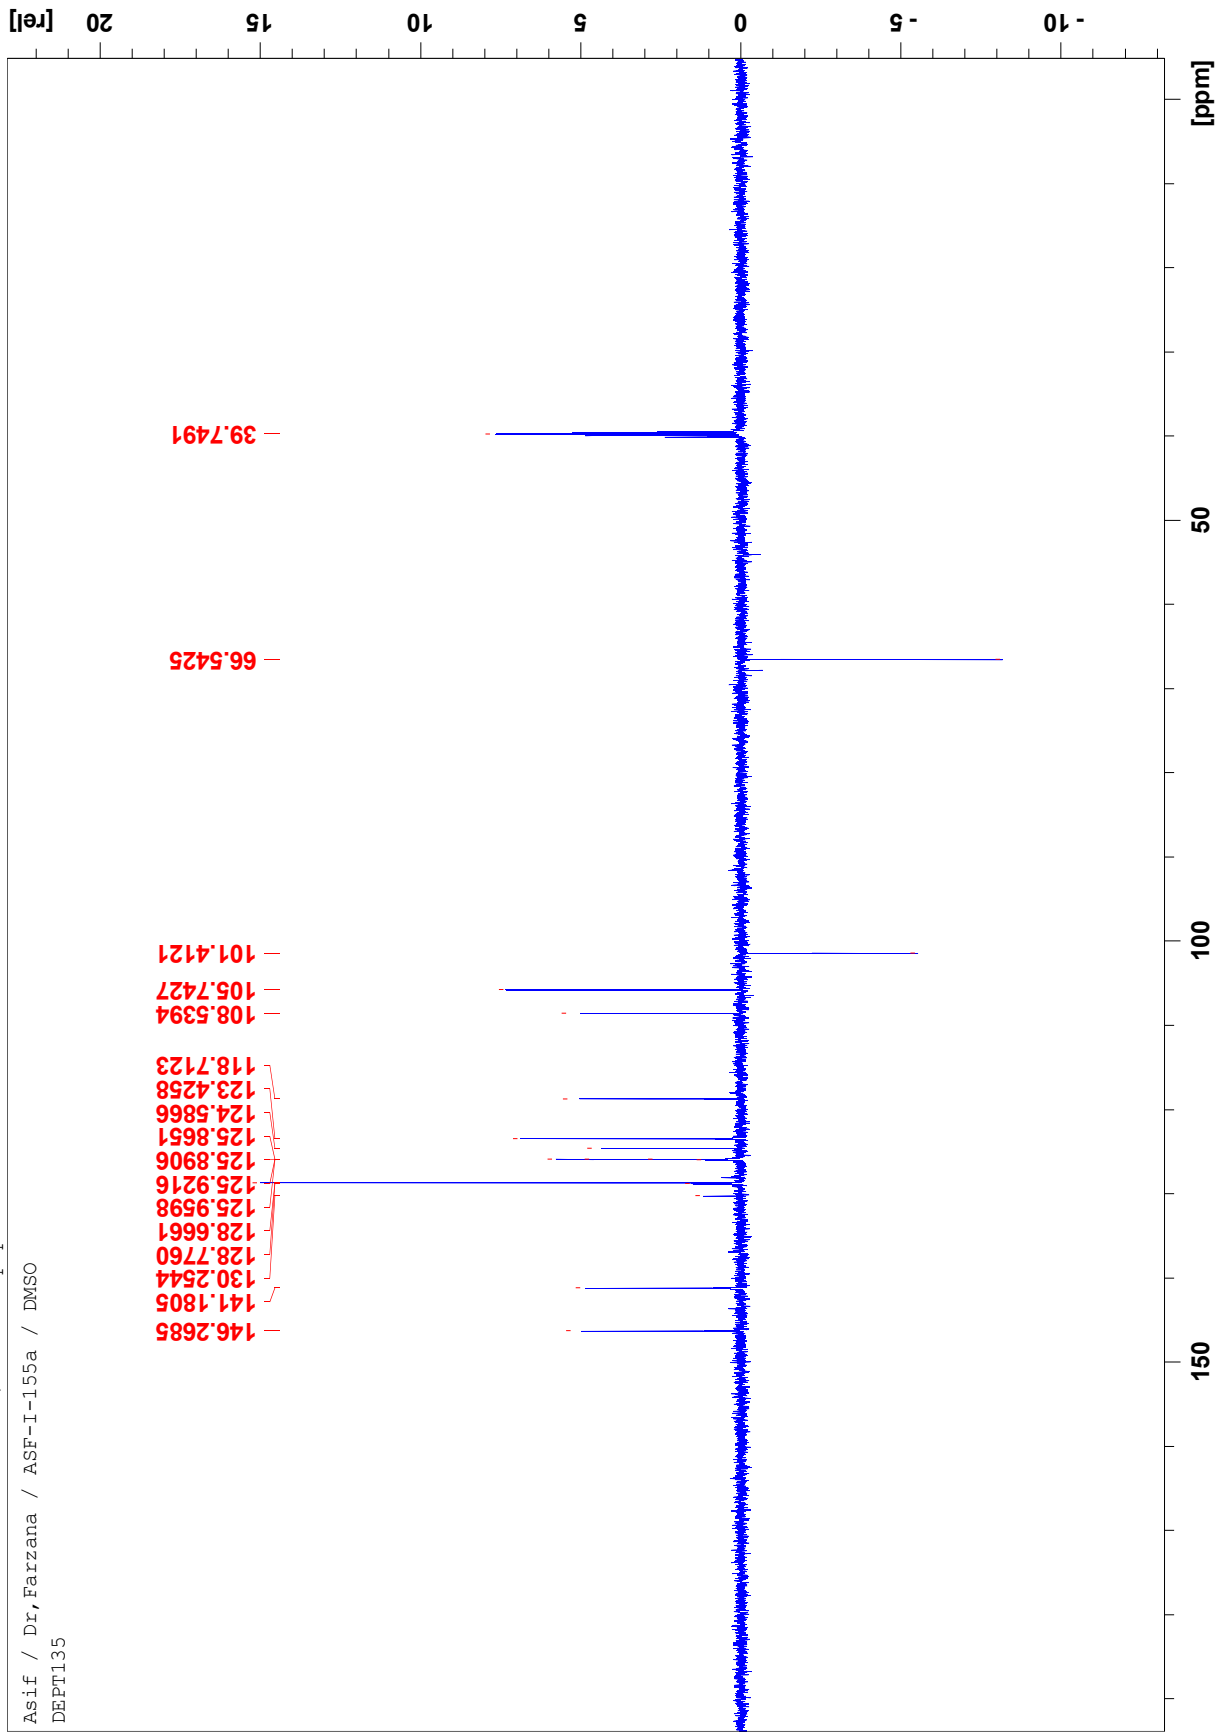

# Compound 22

"asf-i-149a bb" 1 1 "D:\Asif C13 piperinic acid series"  
Asif / Dr. Farzana / ASF-I.149a / DMSO  
BB

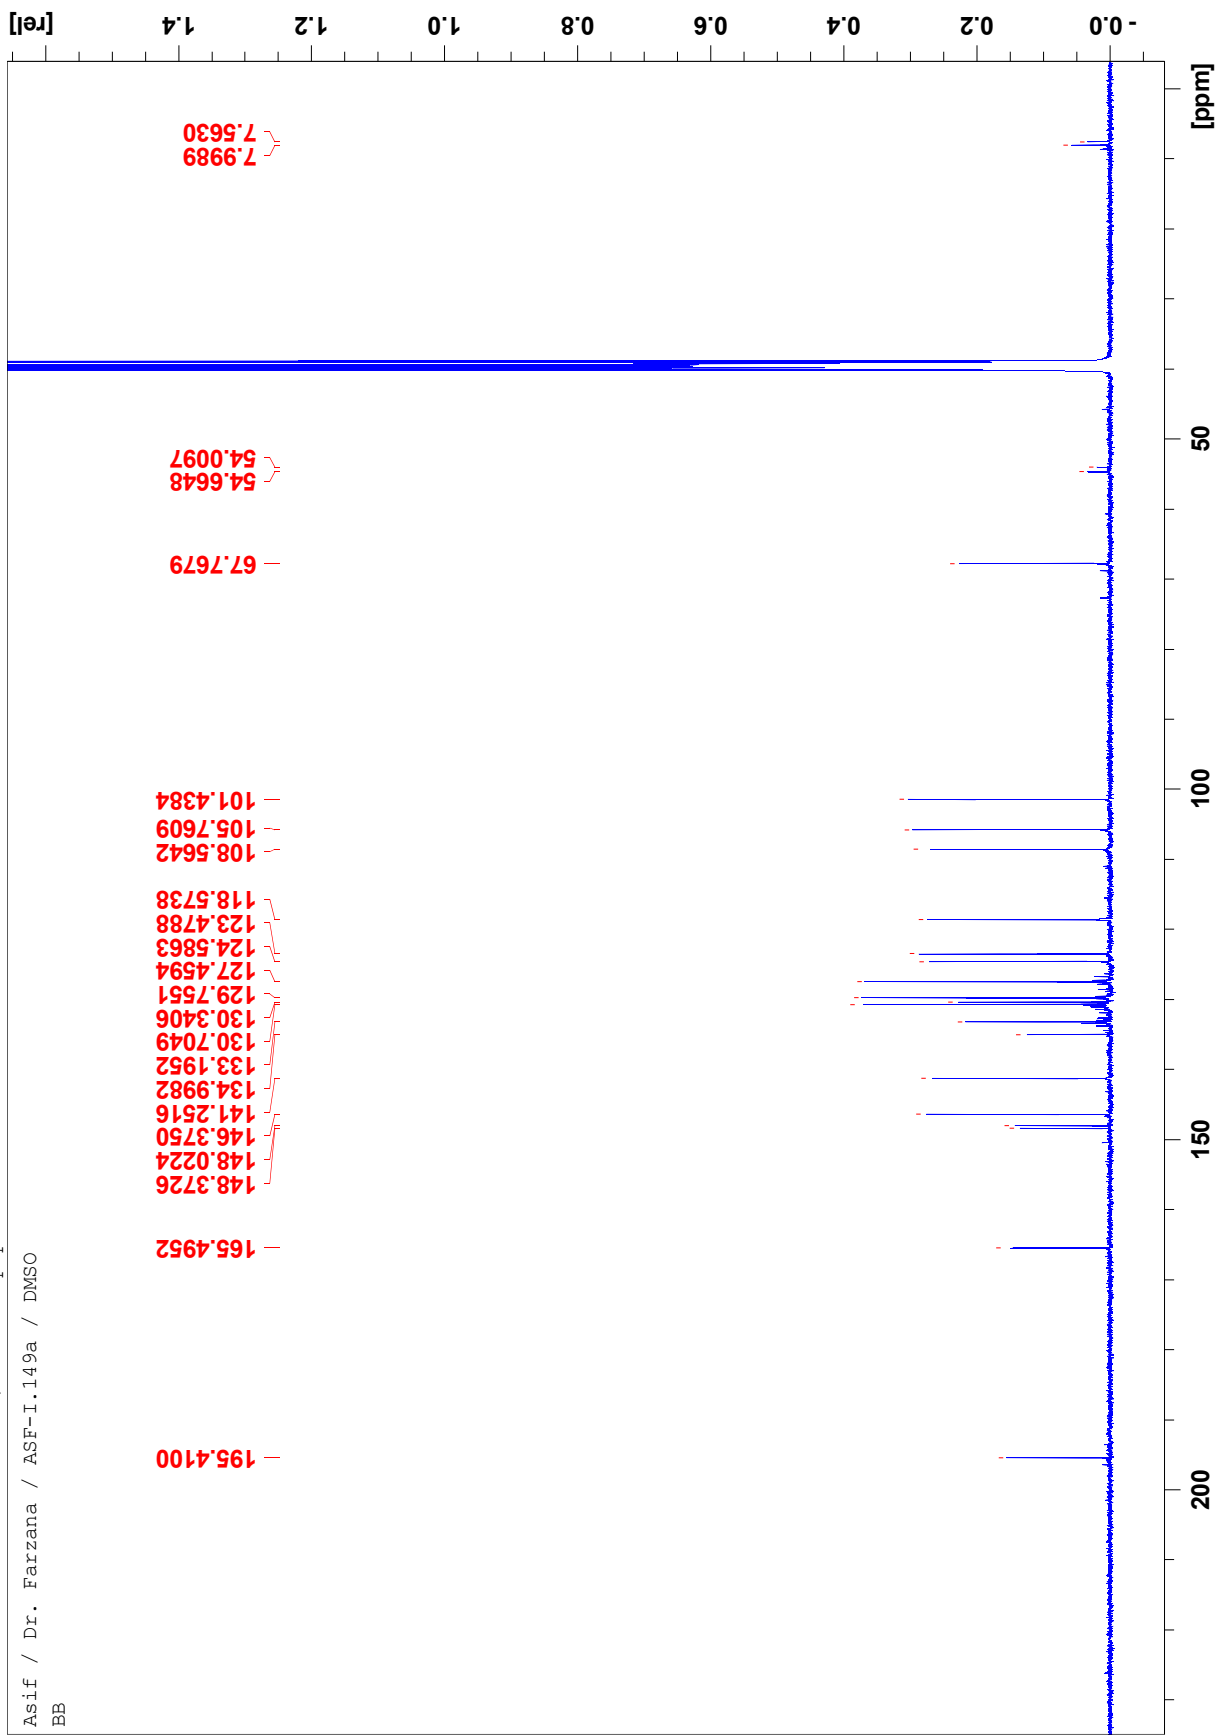

# Compound 22

"asf-i-149a bb" 3 1 "D:\Asif C13 piperic acid series"  
Asif / Dr. Farzana / ASF-I.149a / DMSO  
DEPT90

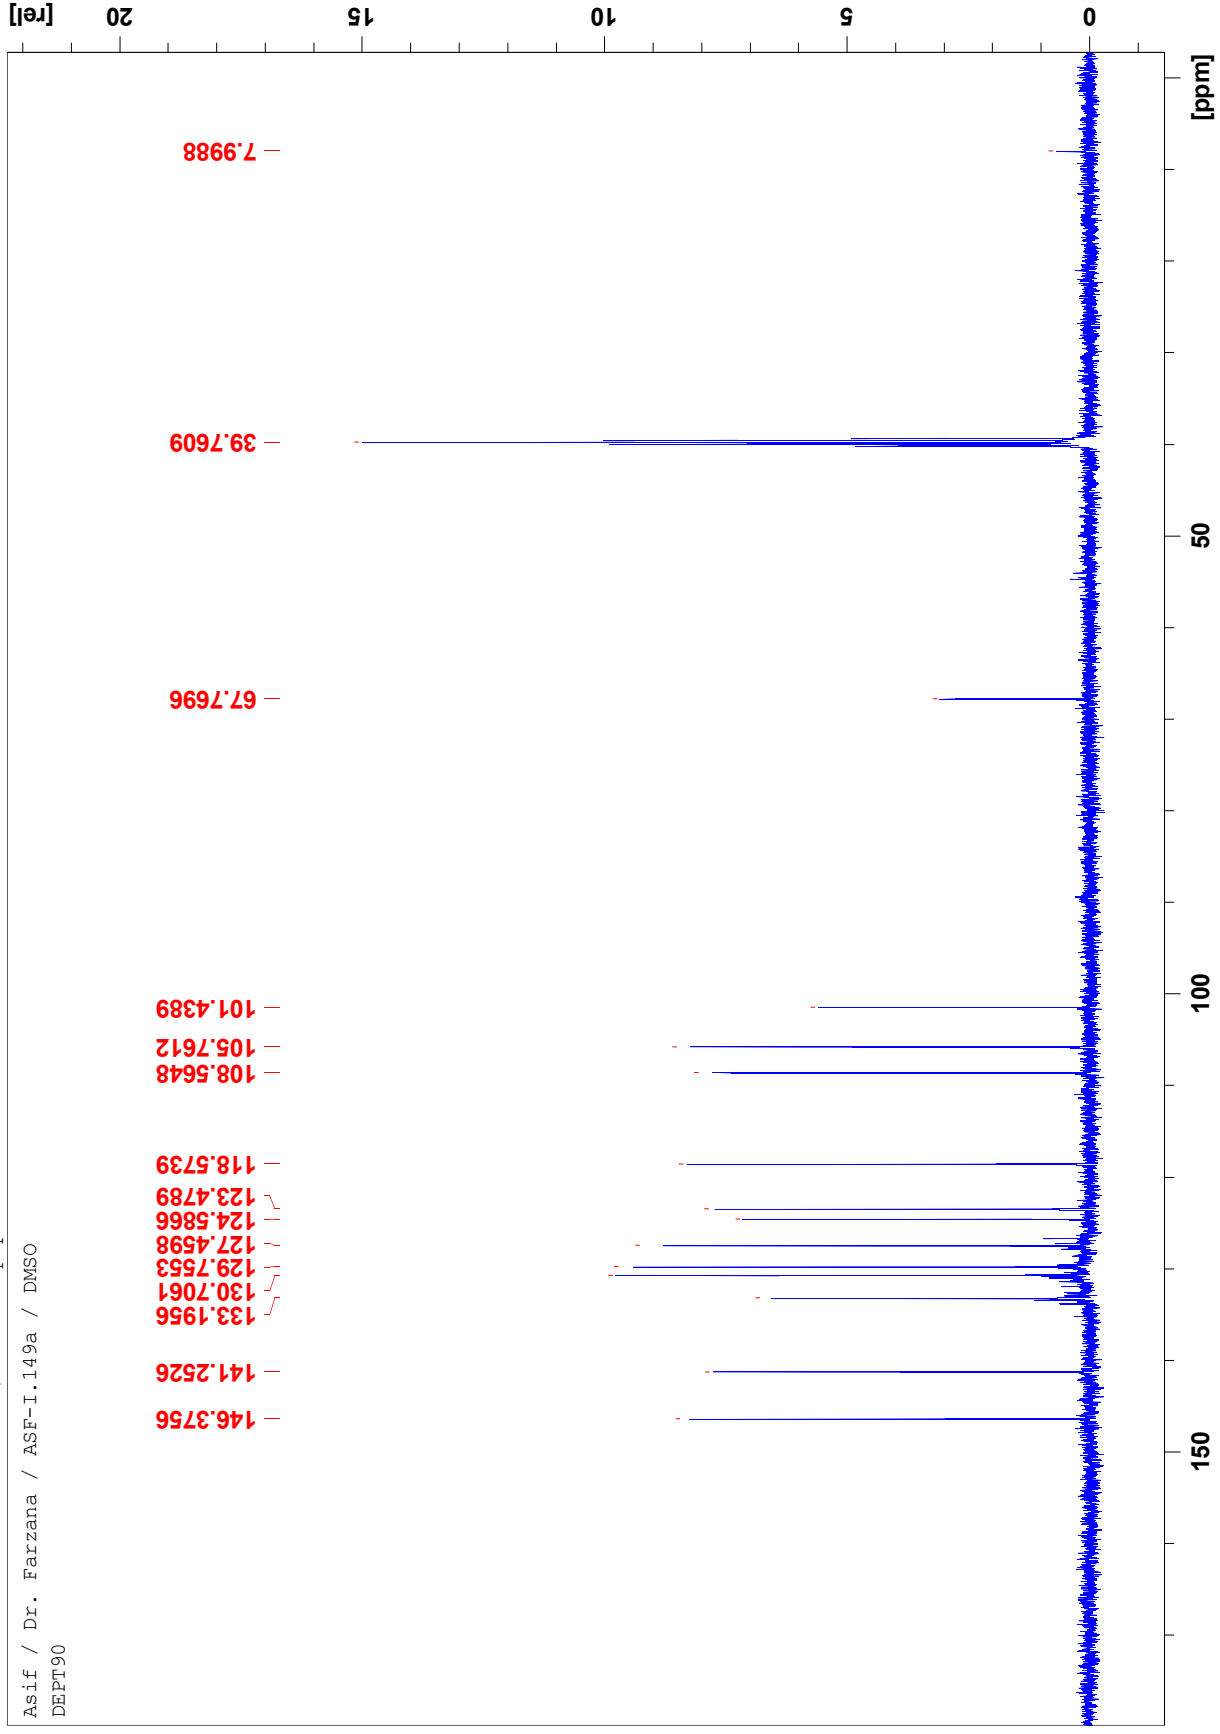

# Compound 22

"asf-i-149a bb" 2 1 "D:\Asif C13 piperic acid series"  
Asif / Dr. Farzana / ASF-I.149a / DMSO  
DEPT135

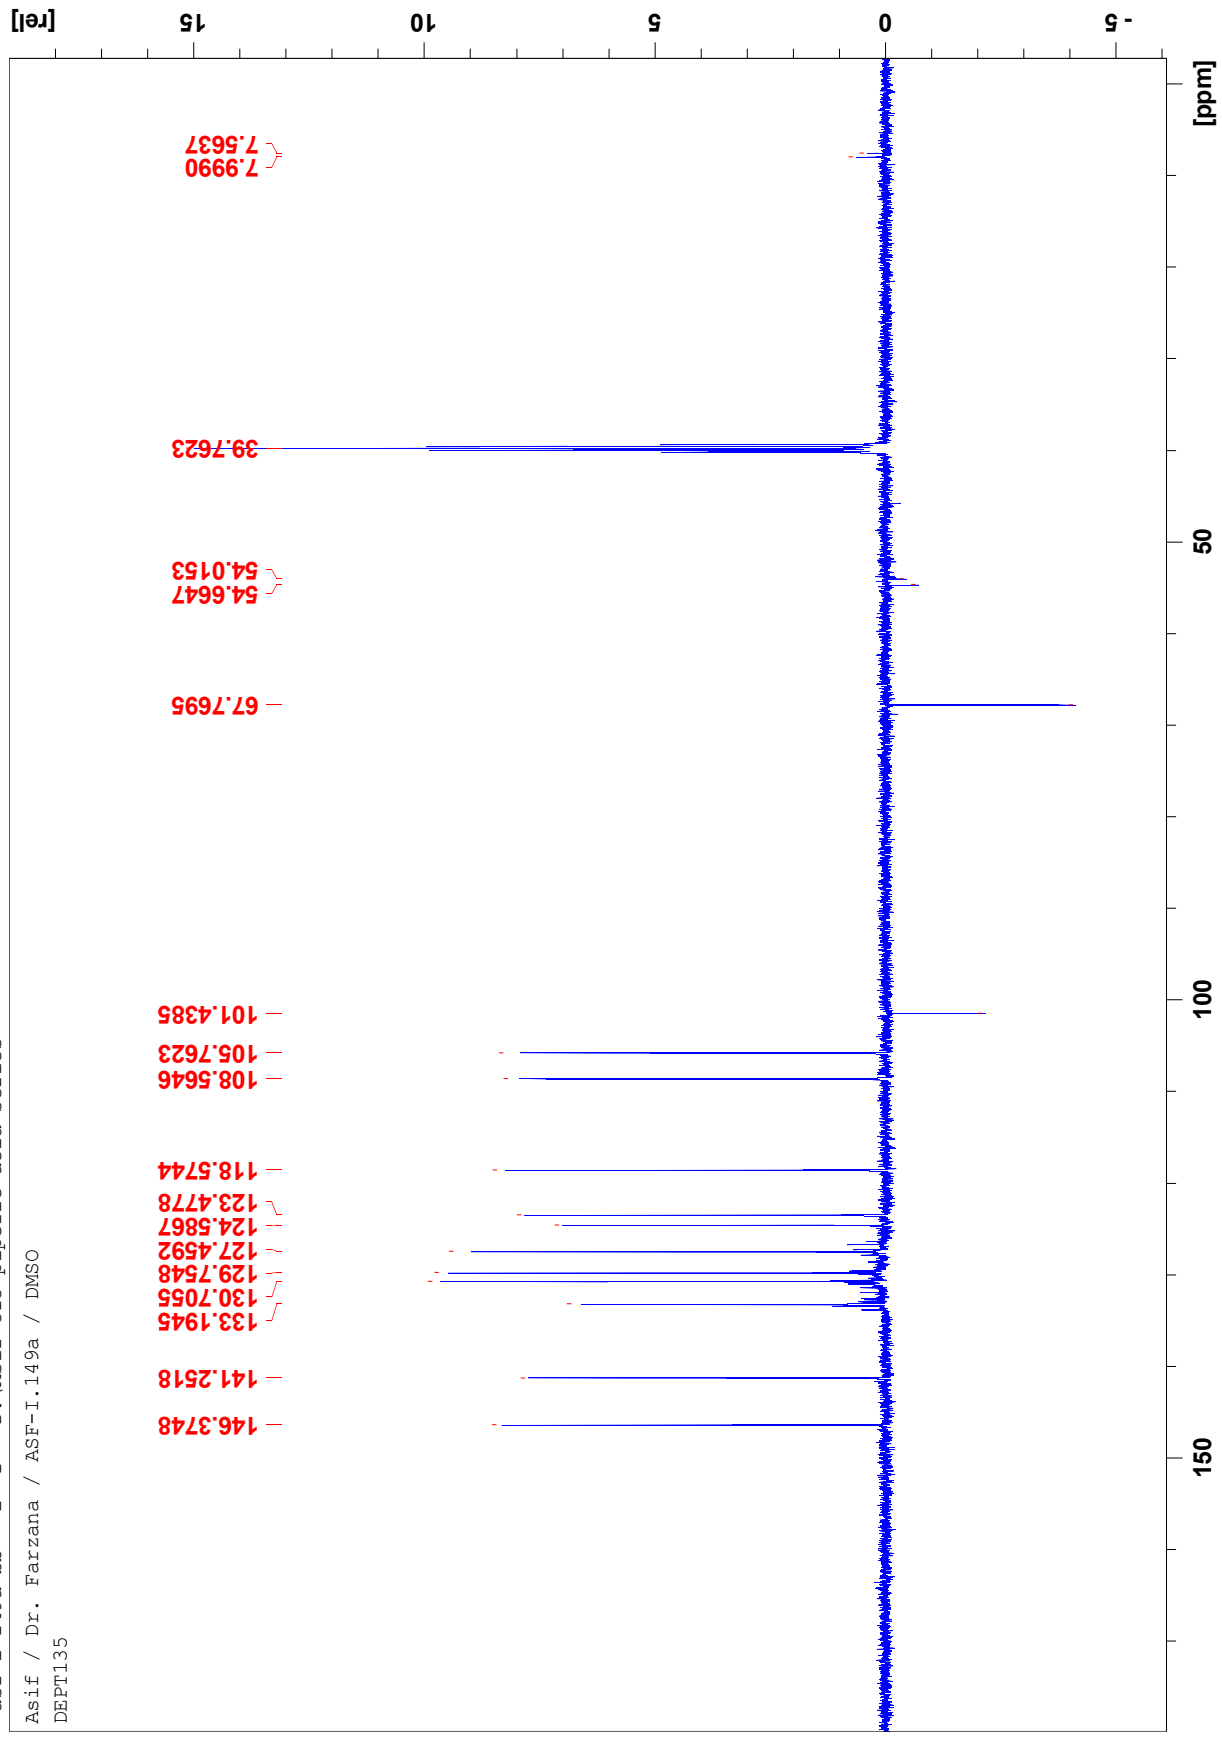

# Compound 23

asf-i-159a 1 1 "D:\Asif C13 piperinic acid series"

ASIF/DR.FARZANA/ASF.I.159A/DMSO

BB

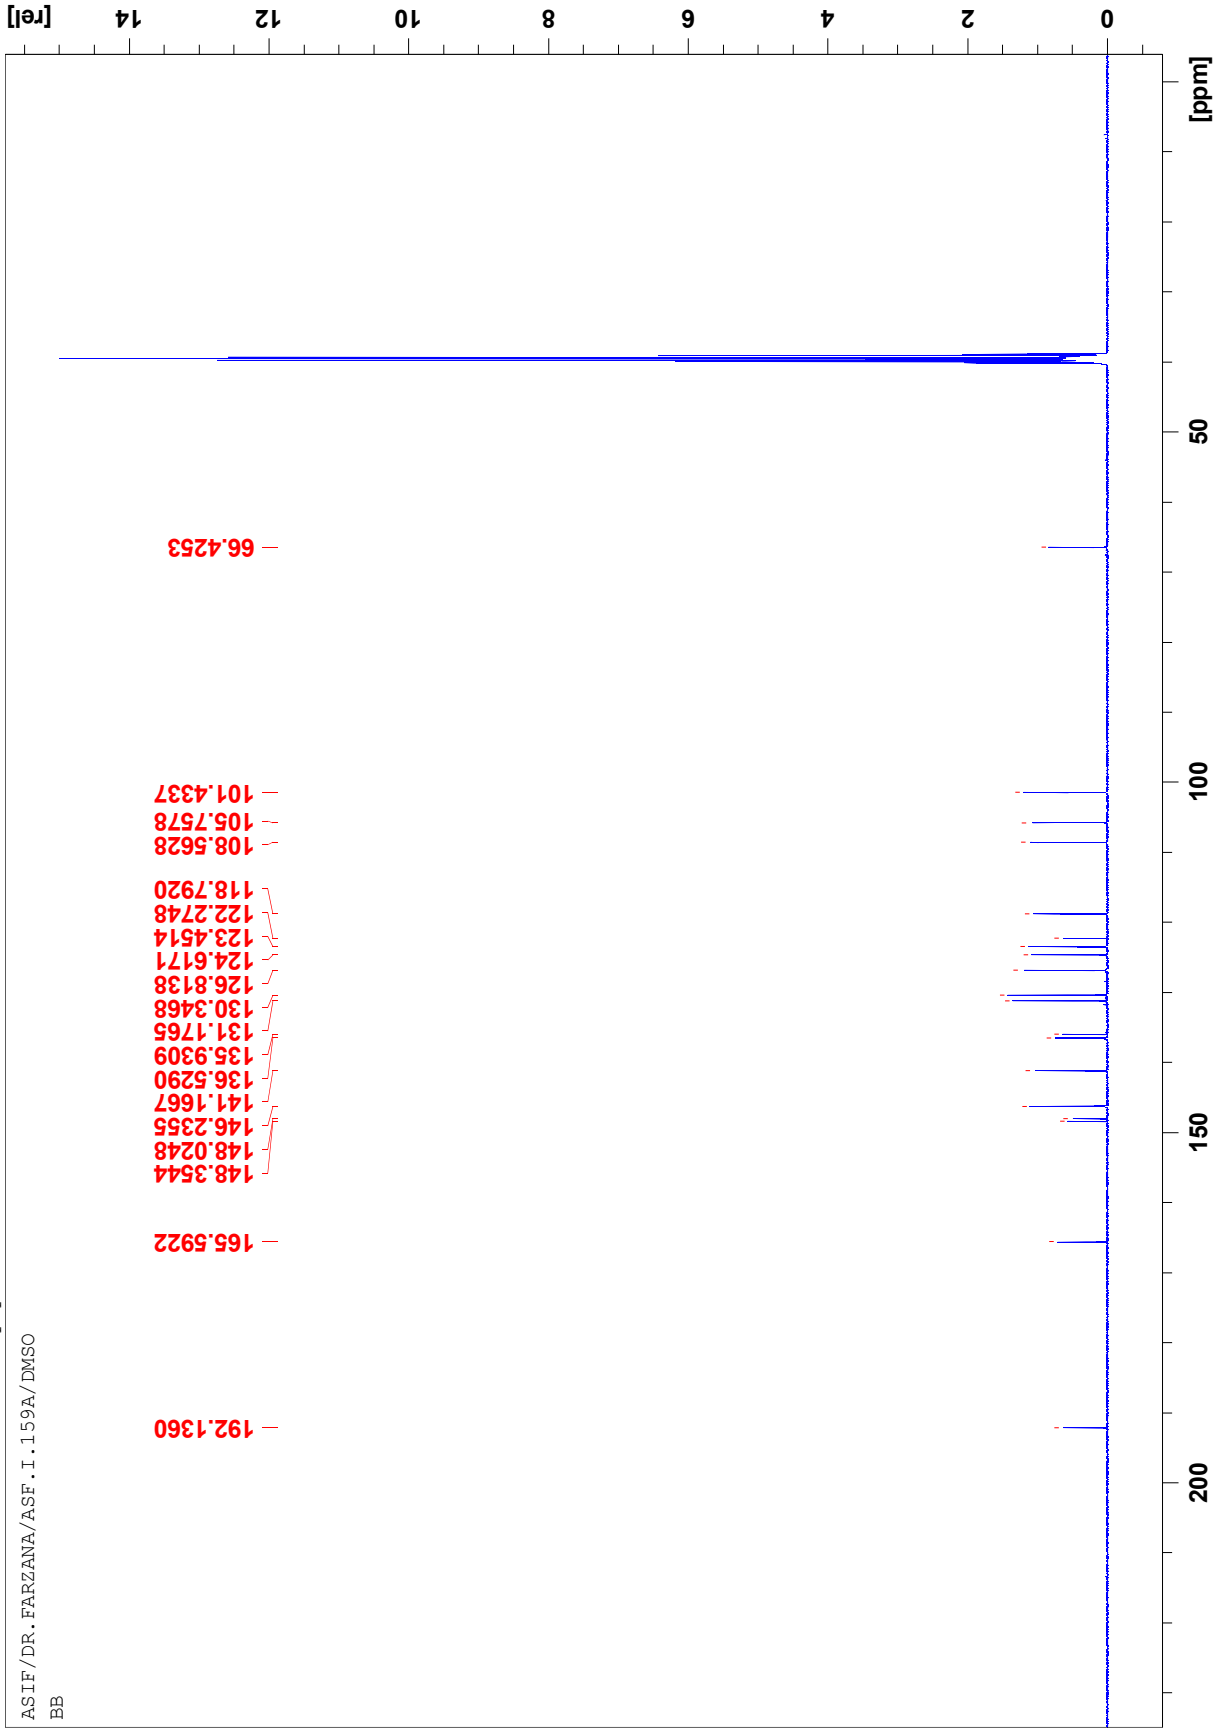

# Compound 23

asf-i-159a 3 1 "D:\Asif C13 piperic acid series"  
ASIF/DR.FARZANA/ASF.I.159A/DMSO  
DEPT90

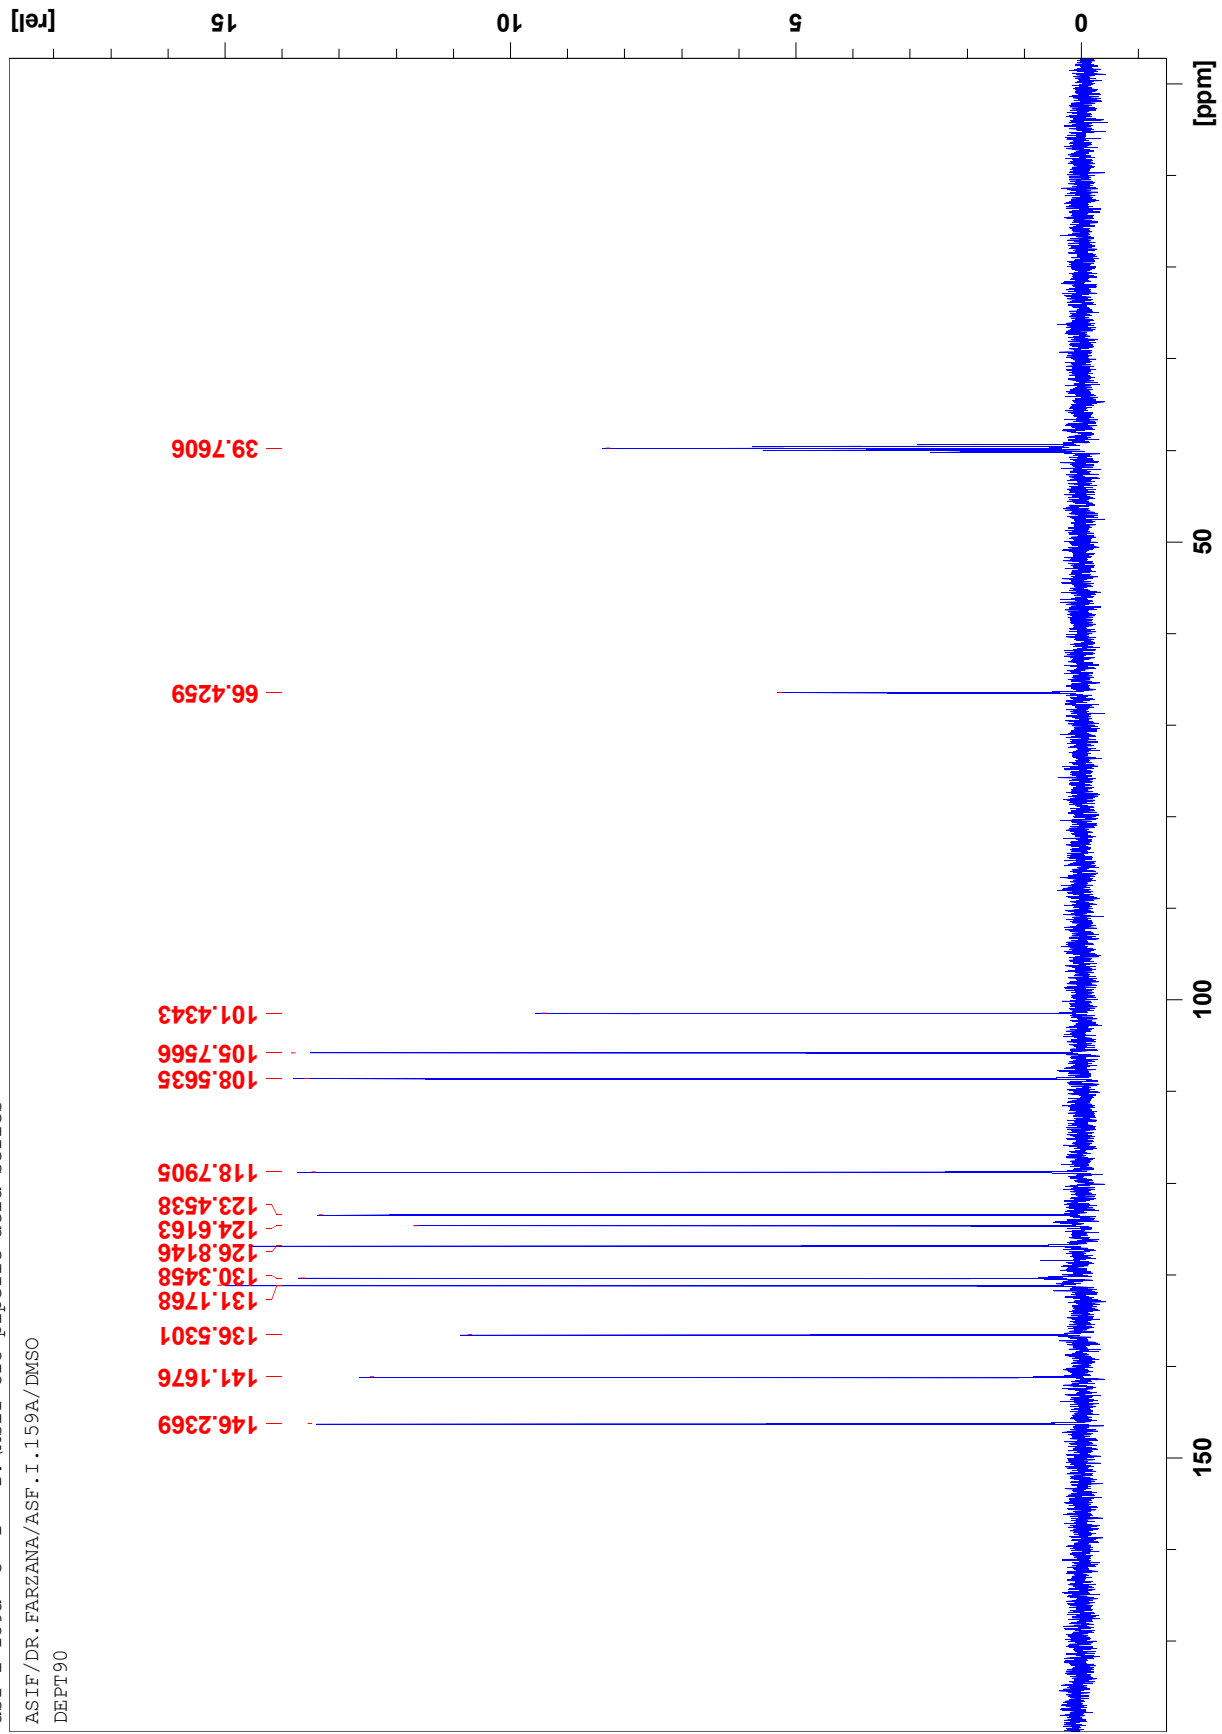

# Compound 23

asf-i-159a 2 1 "D:\Asif C13 piperic acid series"

ASIF/DR.FARZANA/ASF.I.159A/DMSO

DEPT135

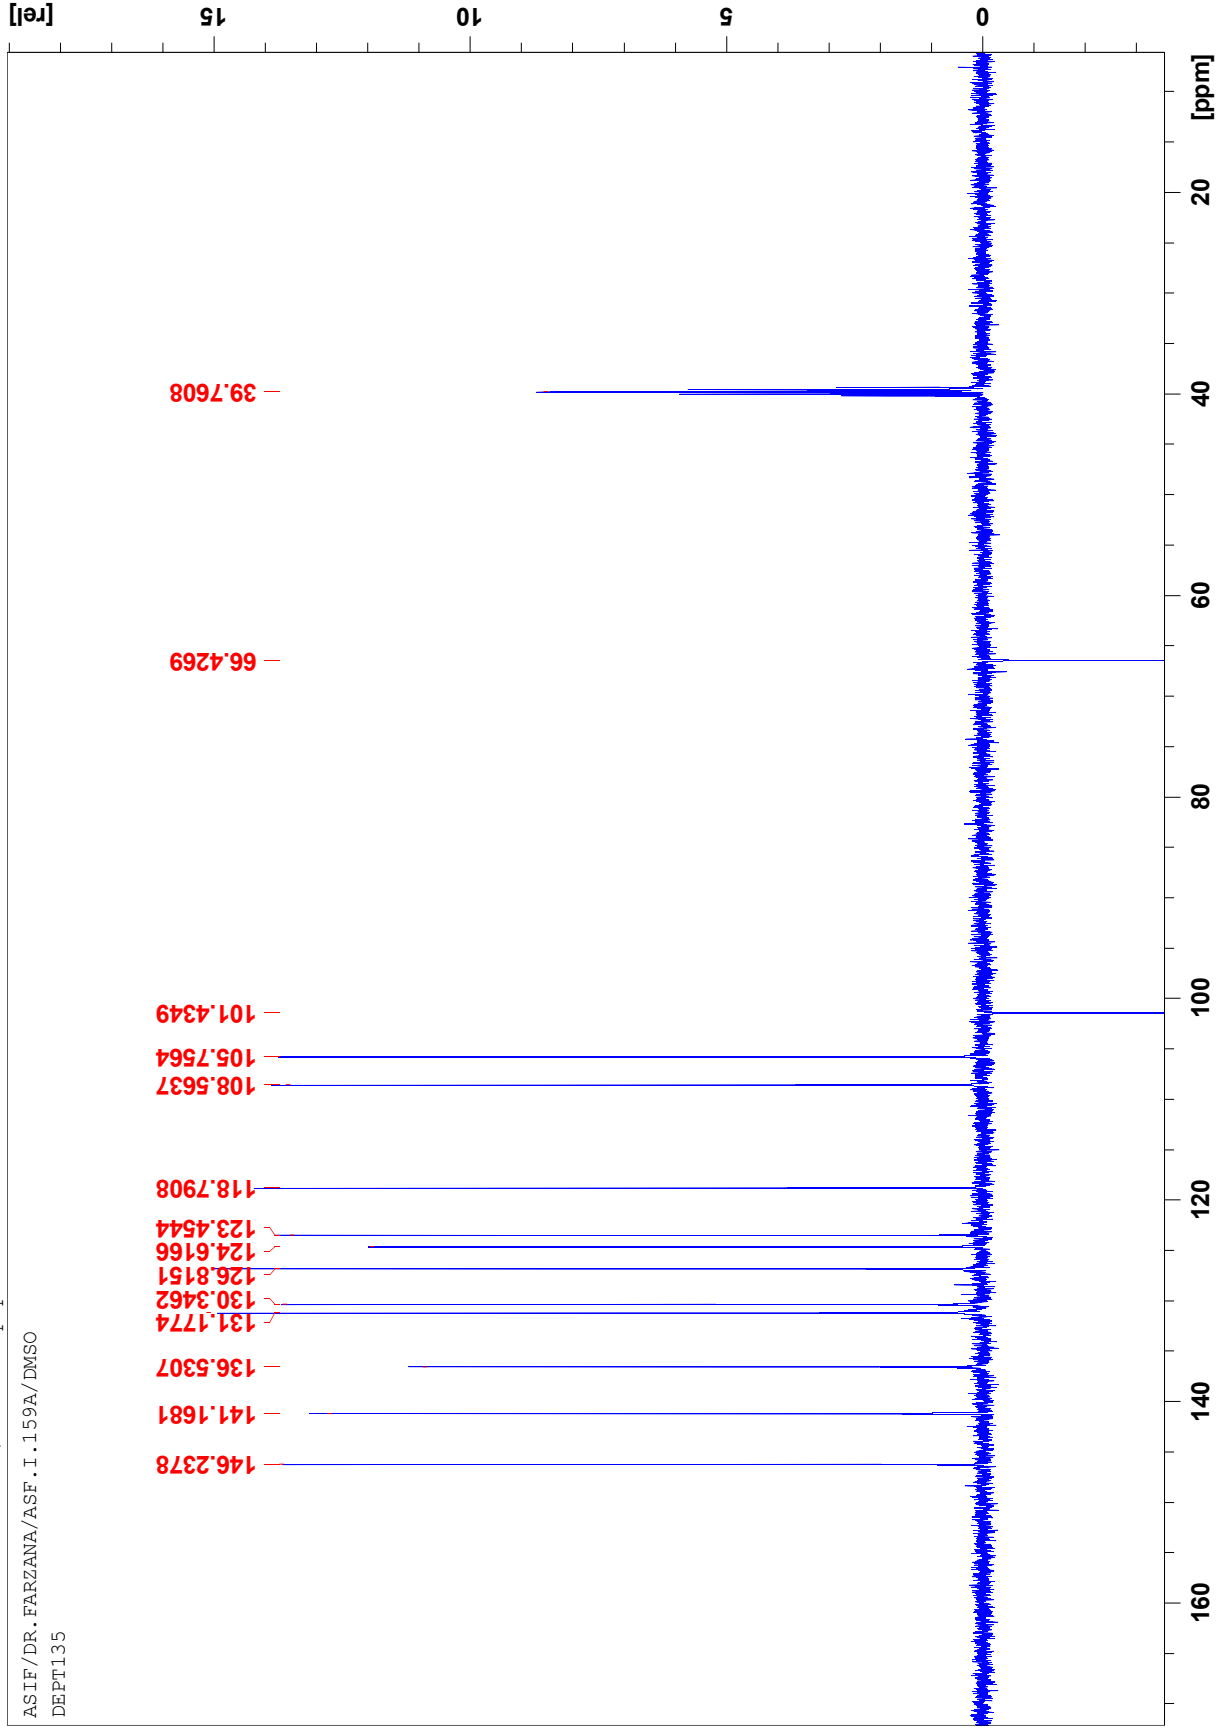

Supplement: d6ra00843g1.pdf [file d6ra00843g1.pdf]
