# Supplementary material for: Multitarget synthetic piperates against key drug targets of Alzheimer's and diabetes mellitus
Source: Royal Society of Chemistry journal article supplement (doi:10.1039/d6ra00843g), 2026-03-30

Compound 2

HEJ-ICCBS  
1/17/2024 1:00:42 PM

File: ASF-I-7a

Date Run: 01-17-2024 (Time Run: 12:50:41)

Sample: ASIF / PROF.DR. FARZANA SHAHEEN

Instrument: JEOL JMS 600H-1

Inlet: Direct Probe

Ionization mode: EI+

Run By: MASS LAB 104

Scan: 10

Base: m/z 115; 99.9%FS TIC: 7034117

#Ions: 323

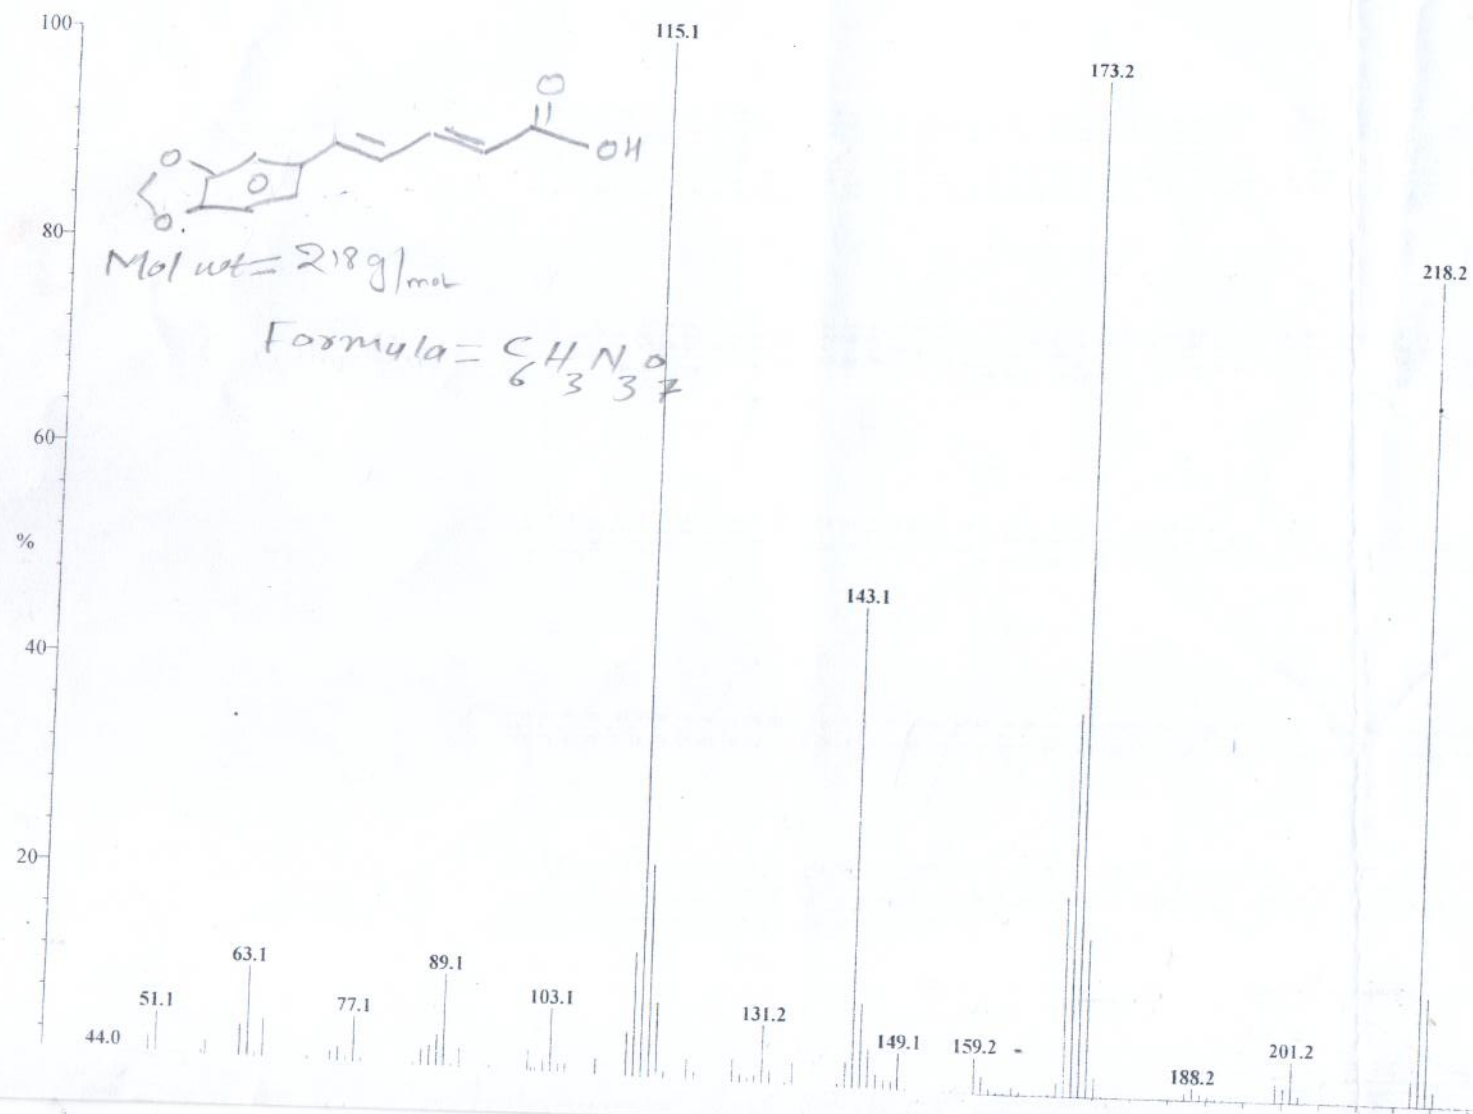

**Compound 3**

File: ASF-I-101a  
Sample: ASIF/PROF.DR.FARZANA SHAHEEN  
Instrument: JEOL JMS 600H-1  
Inlet: Direct Probe

Date Run: 03-12-2024 (Time Run: 09:54:57)

Run By: MASS LAB 104

Ionization mode: EI+

Scan: 7

#Ions: 351

Base: m/z 115; 99.9%FS TIC: 6932585

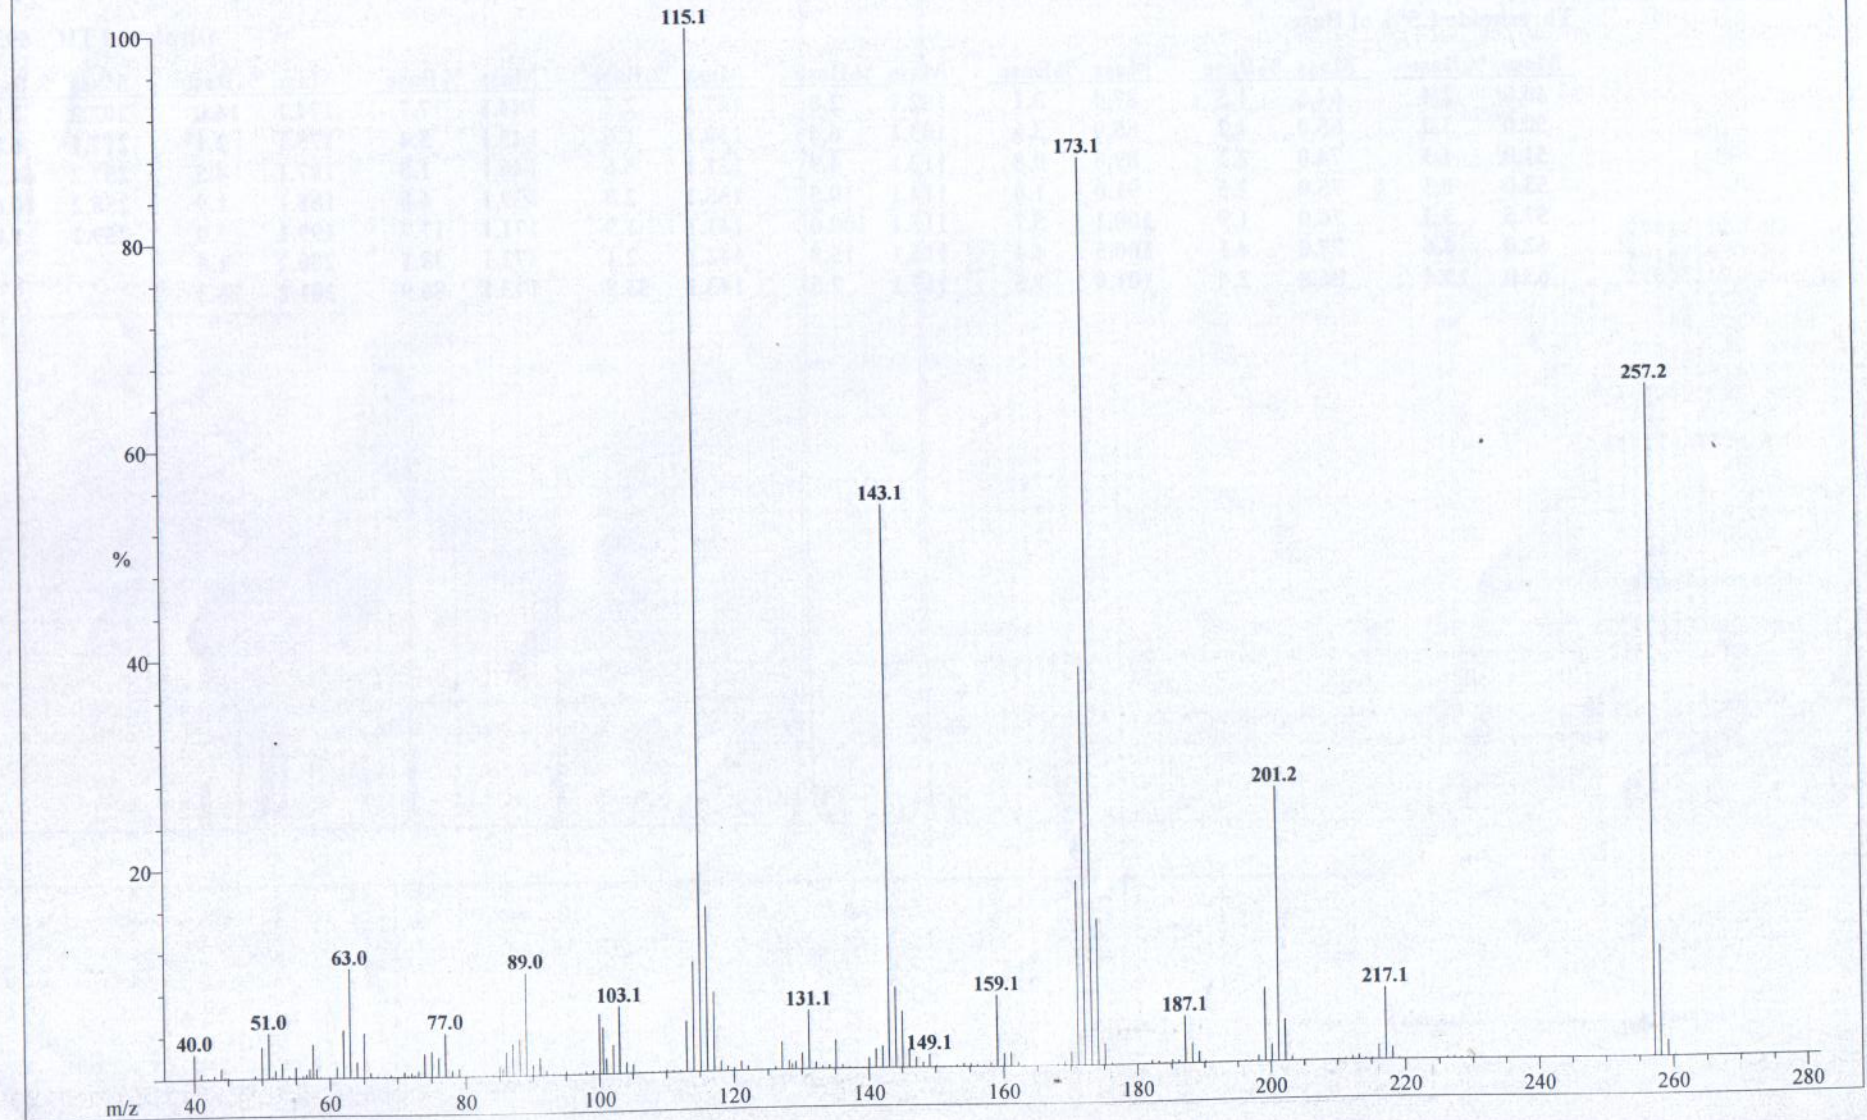

Compound 4

File: ASF-II-67a  
Sample: ASIF /PROF. DR. FARZANA  
Instrument: JEOL JMS 600H-1  
Inlet: Direct Probe

Date Run: 07-11-2024 (Time Run: 14:22:20)

Run By: MASS LAB 104

Ionization mode: EI+

Scan: 14

Base: m/z 173; 99.9%FS TIC: 7668170

#Ions: 278

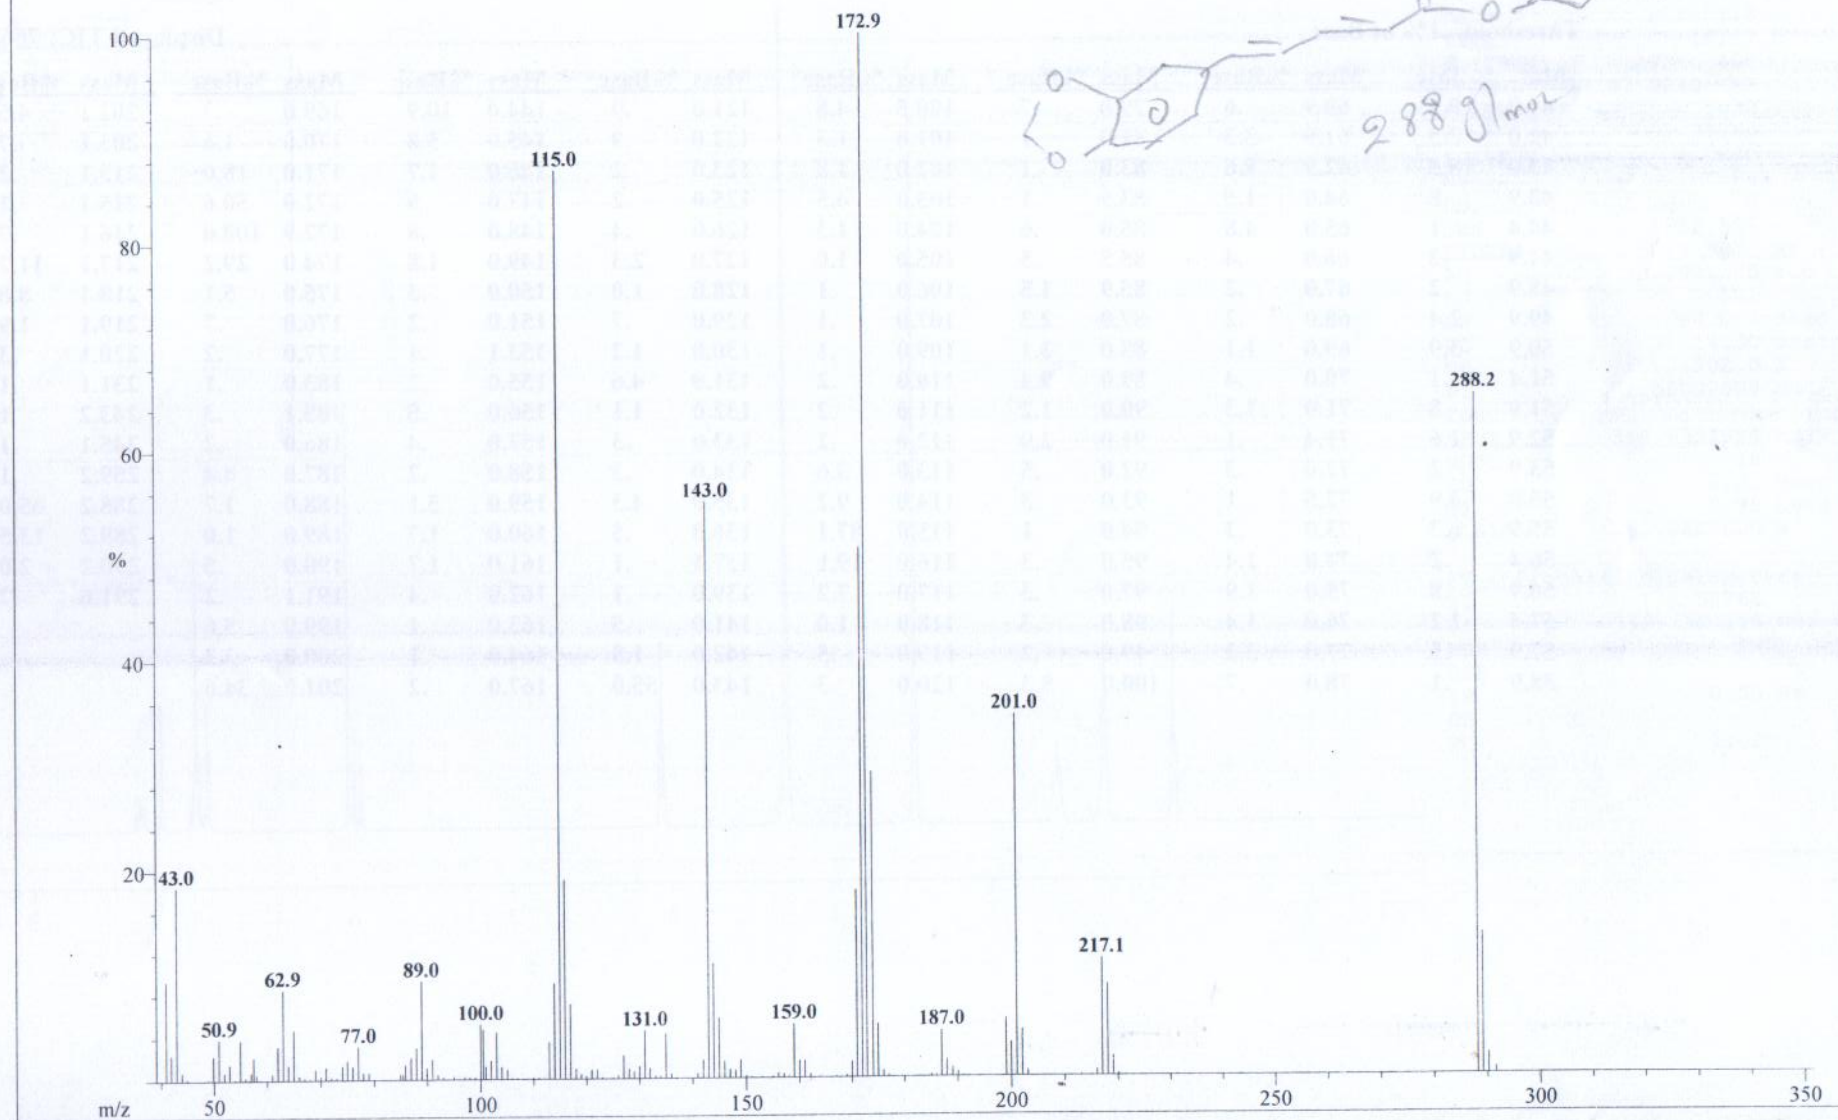

Compound 5

File: ASF-II-69a  
Sample: ASIF /PROF. DR. FARZANA  
Instrument: JEOL JMS 600H-1  
Inlet: Direct Probe

Date Run: 07-12-2024 (Time Run: 14:45:24)

Run By: MASS LAB 104

Ionization mode: EI+

Scan: 8  
Base: m/z 272; 35.1%FS TIC: 2216251

#Ions: 413

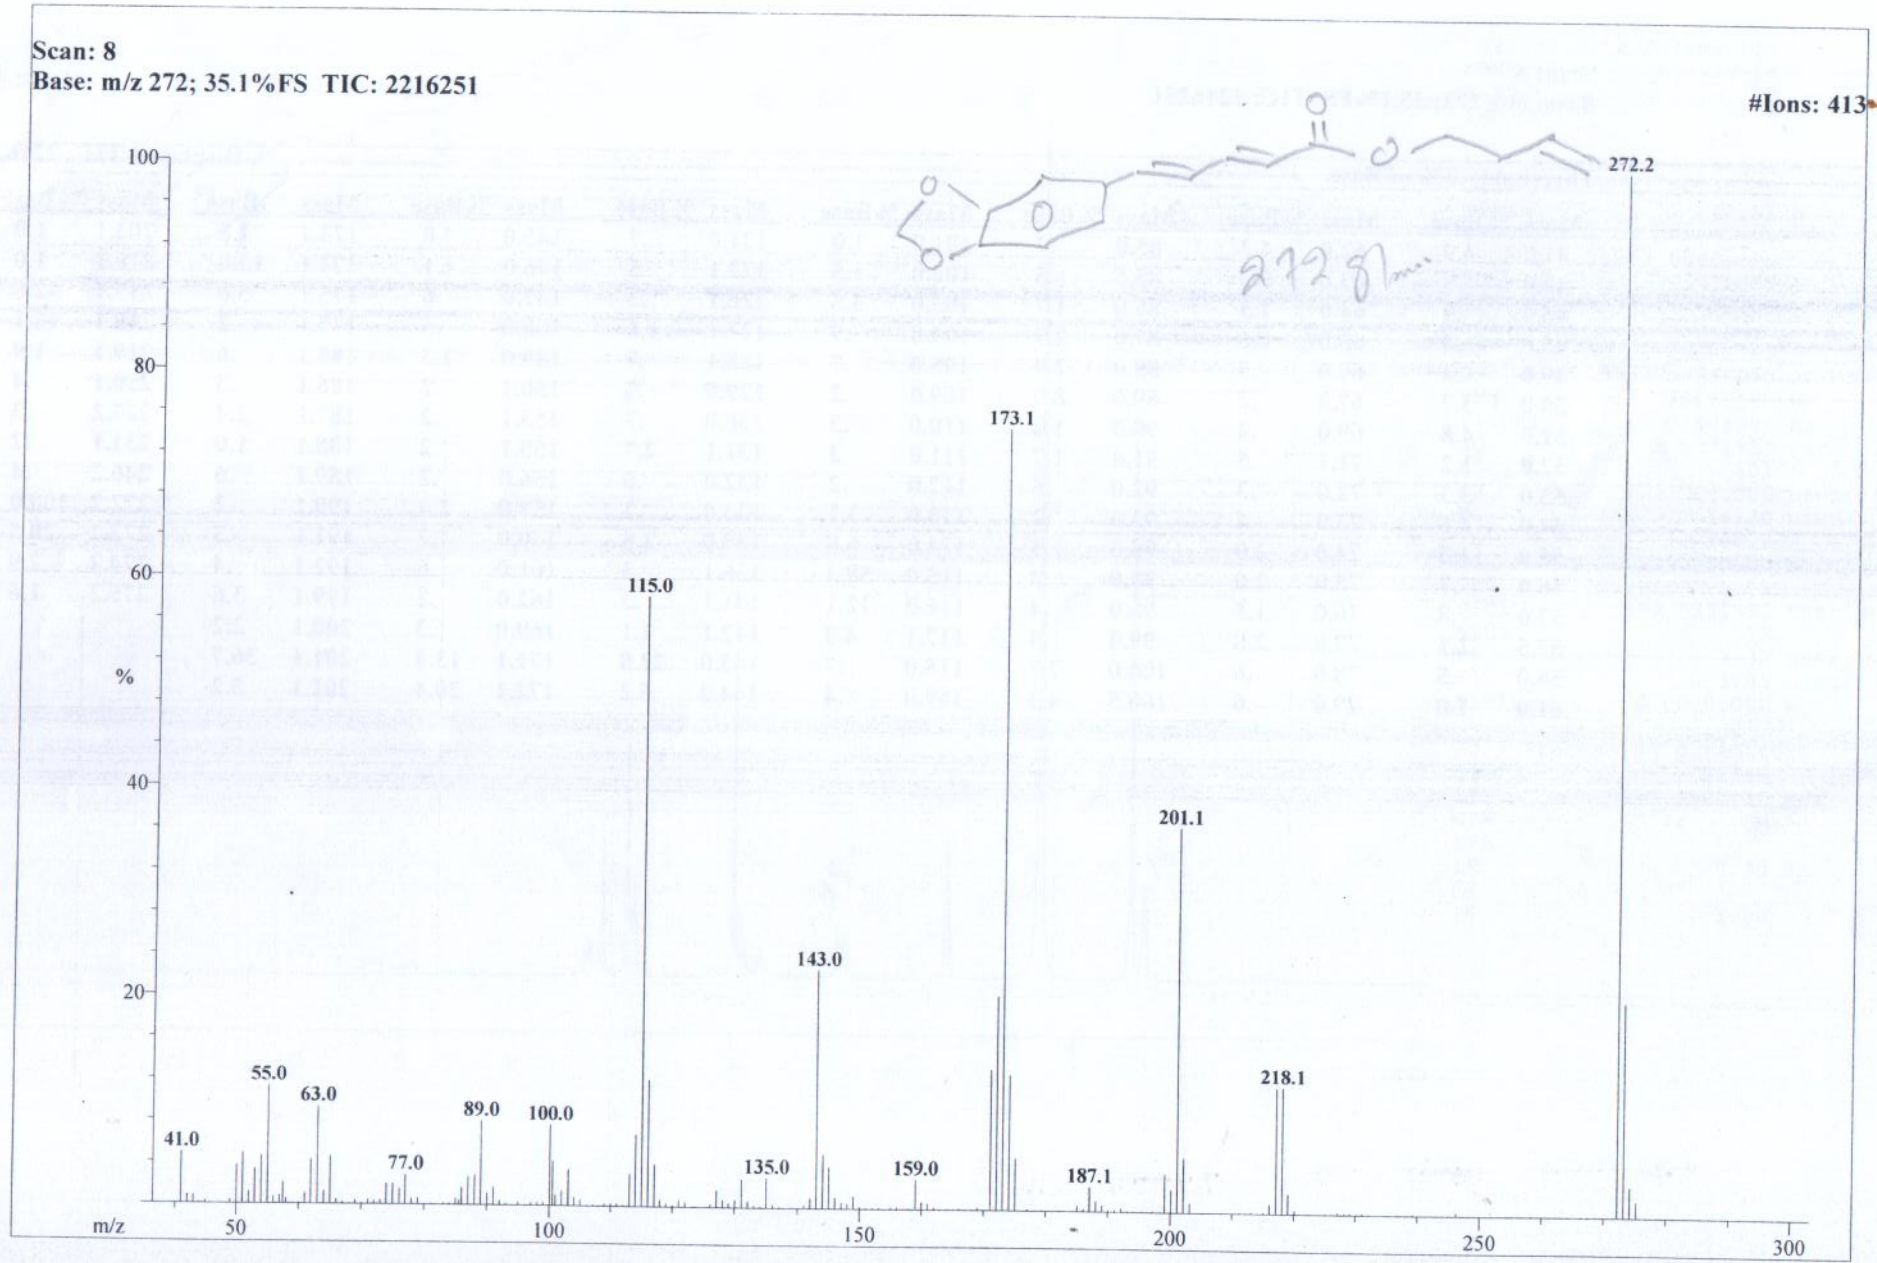

Compound 6

HEJ-ICCBS  
3/16/2024 10:32:23 AM

File: ASF-I-103a  
Sample: ASIF /PROF. DR. FARZANA  
Instrument: JEOL JMS 600H-1  
Inlet: Direct Probe

Date Run: 03-16-2024 (Time Run: 10:21:38)

Run By: MASS LAB 104

Ionization mode: EI+

Scan: 8

Base: m/z 217; 18.8%FS TIC: 1367660

#Ions: 612

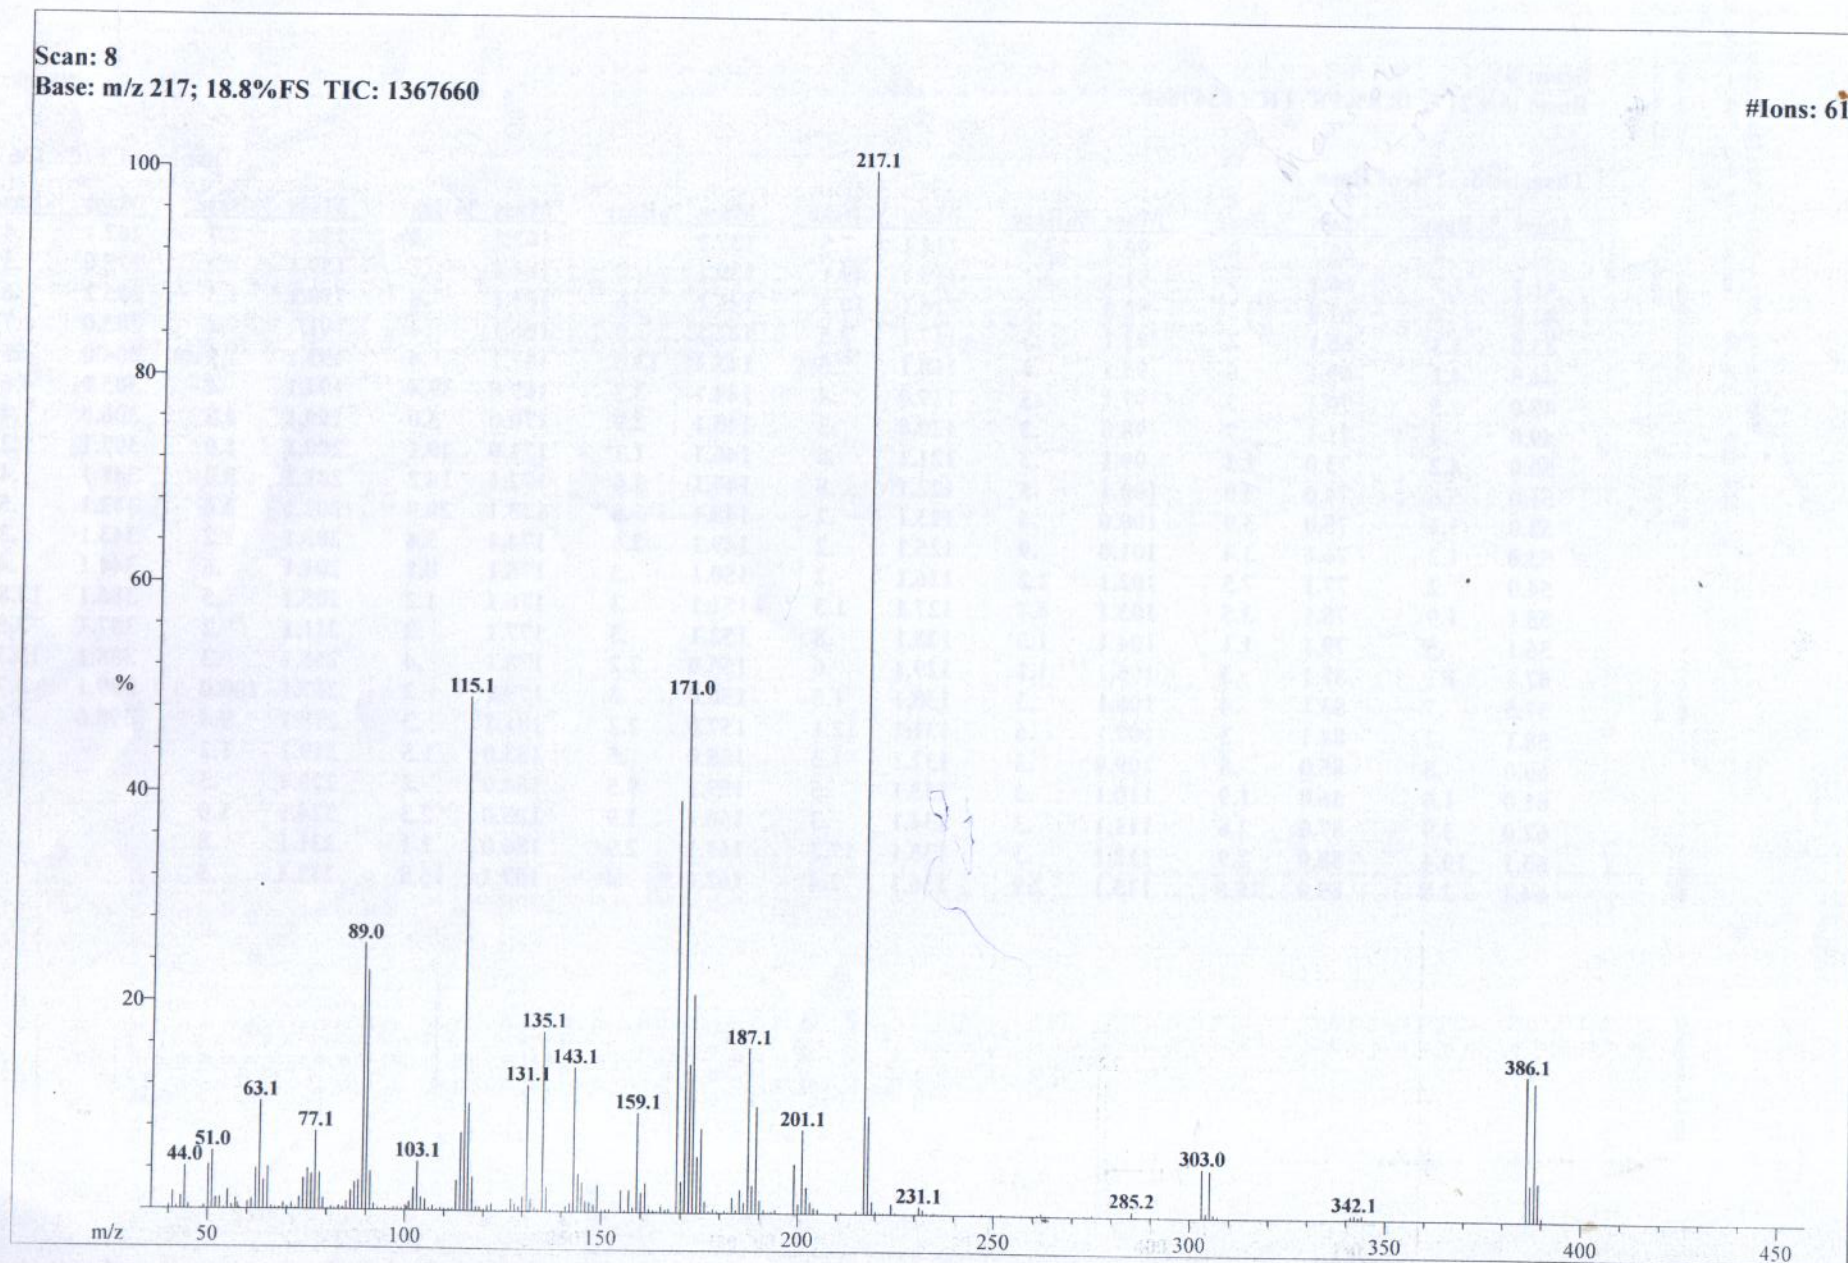

Compound 7

HEJ-ICCBS  
7/9/2024 3:39:02 PM

File: ASF-II-59a  
Sample: ASIF /PROF. DR. FARZANA  
Instrument: JEOL JMS 600H-1  
Inlet: Direct Probe

Date Run: 07-09-2024 (Time Run: 15:31:08)

Ionization mode: EI+

Run By: MASS LAB 104

Scan: 19-20  
Base: m/z 217; 63.1%FS TIC: 4015400

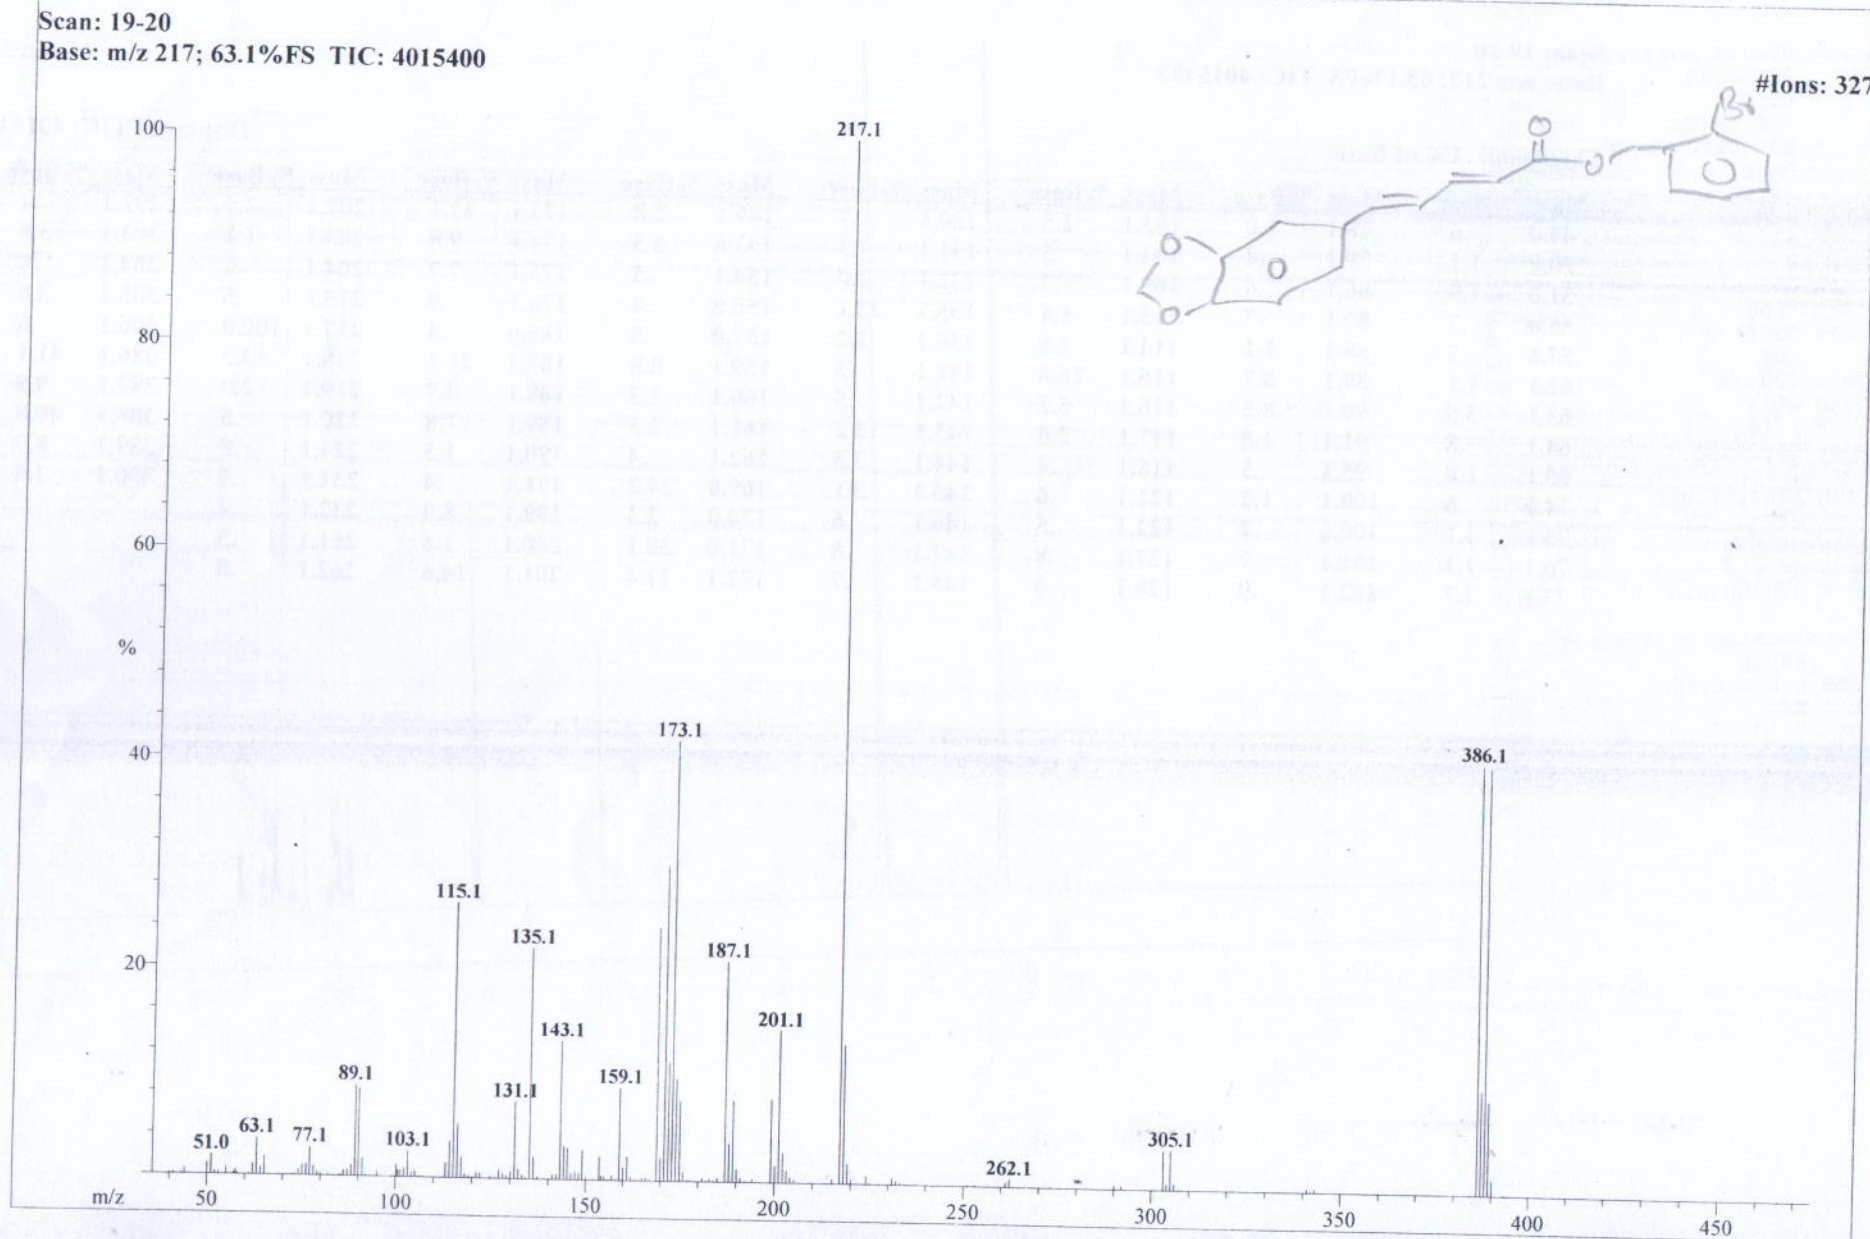

Compound 8

File: ASF-II-63a  
Sample: ASIF /PROF. DR. FARZANA  
Instrument: JEOL JMS 600H-1  
Inlet: Direct Probe

Date Run: 07-09-2024 (Time Run: 15:43:12)

Run By: MASS LAB 104

Ionization mode: EI+

Scan: 15-17  
Base: m/z 217; 88.7%FS TIC: 4613587

#Ions: 304

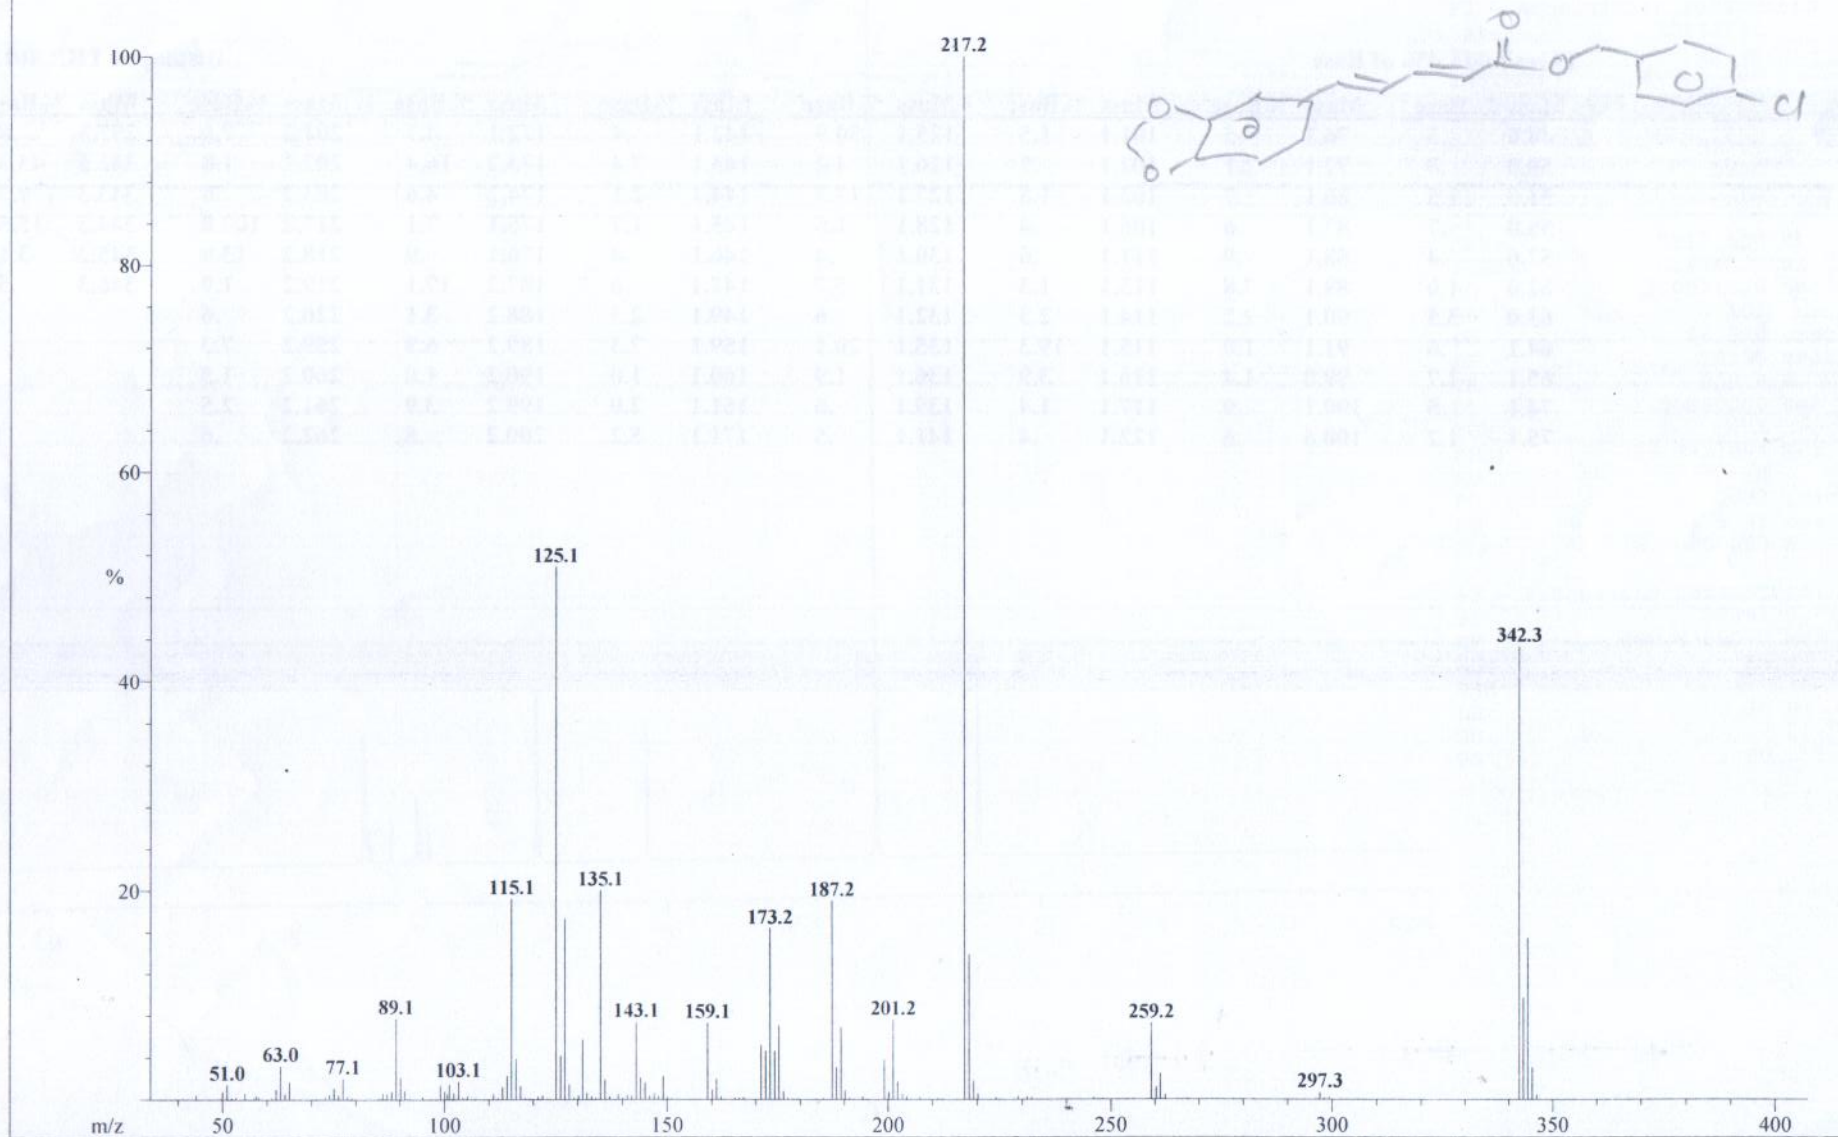

## Compound 9

File: ASF-II-53a

Date Run: 07-08-2024 (Time Run: 14:44:28)

Sample: ASIF /PROF. DR. FARZANA

Instrument: JEOL JMS 600H-1

Run By: MASS LAB 104

Inlet: Direct Probe

Ionization mode: EI+

Scan: 19

Base: m/z 217; 41.5%FS TIC: 3124130

#Ions: 366

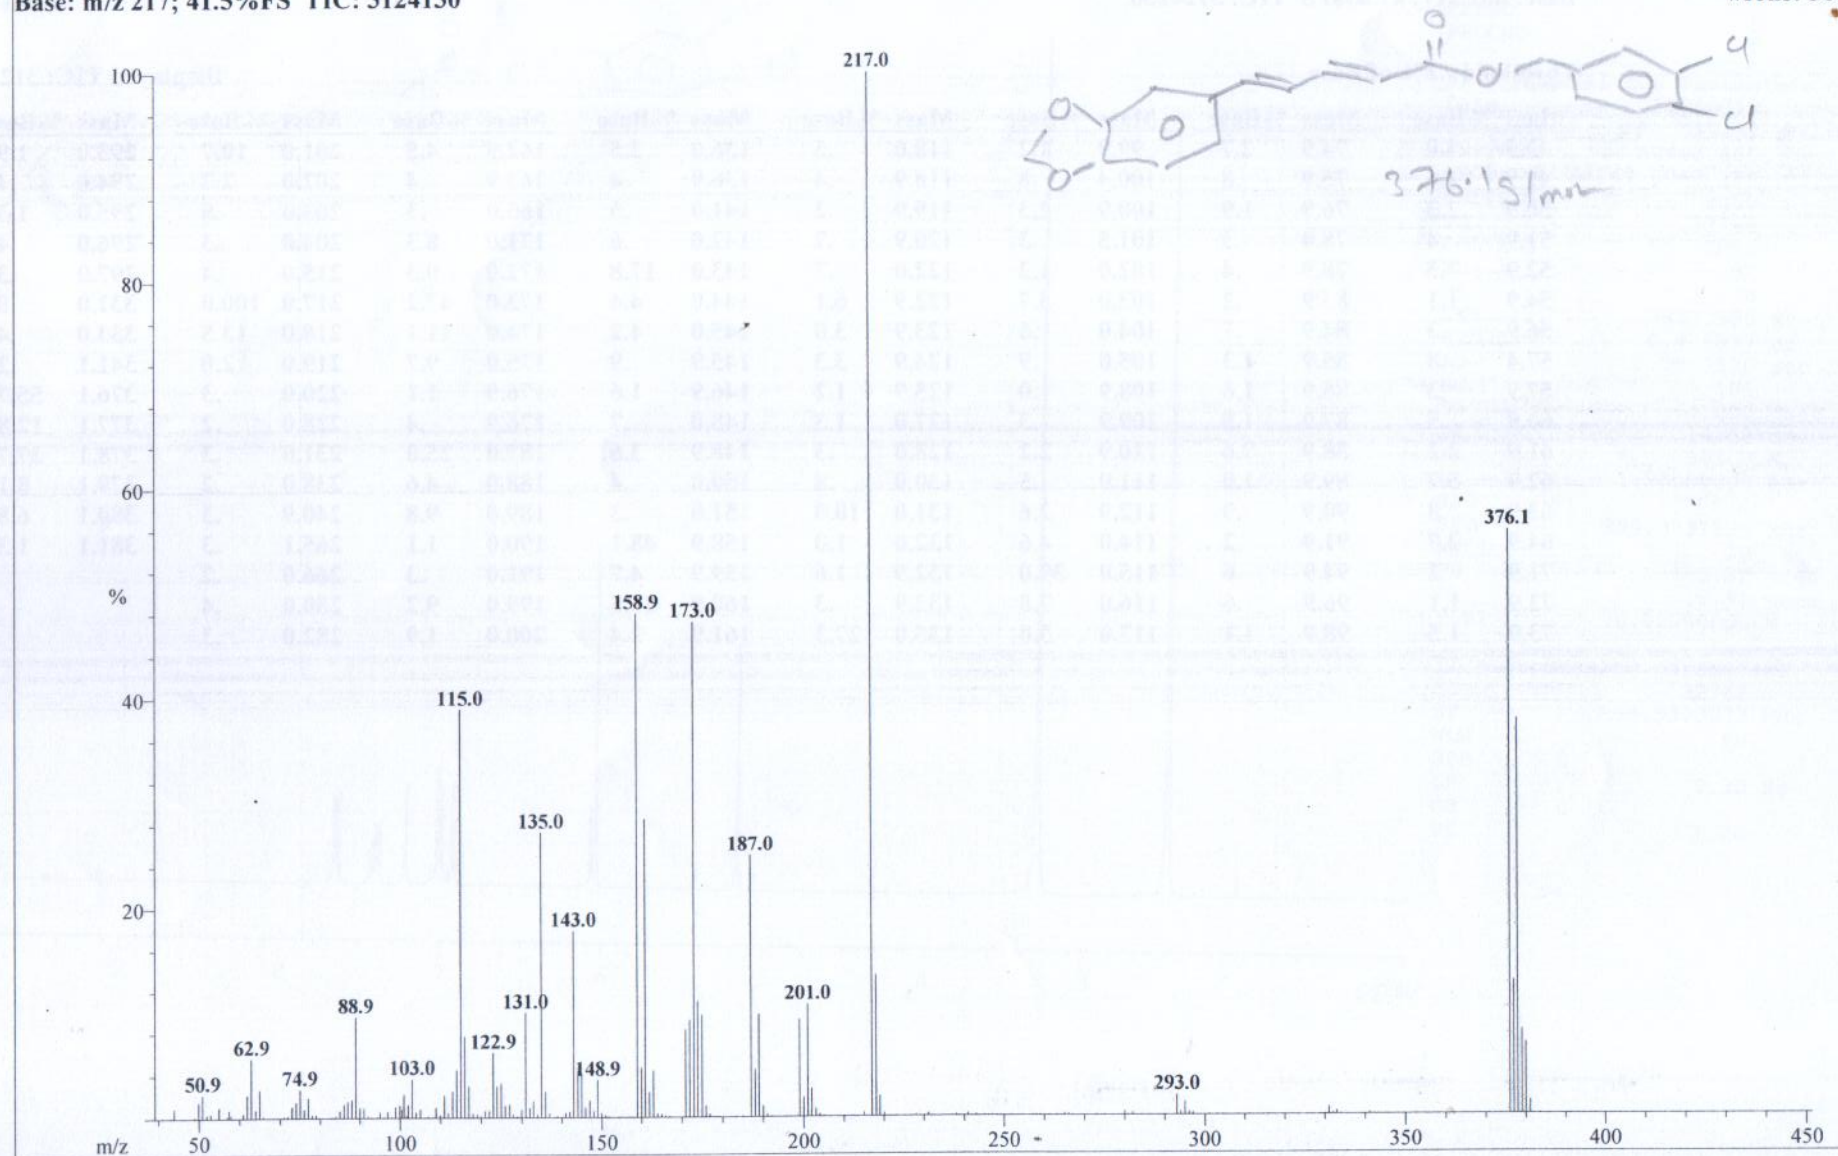

Compound 10

HEJ-ICCBS  
7/5/2024 4:33:06 PM

File: ASF-II-47a  
Sample: ASIF /PROF. DR. FARZANA  
Instrument: JEOL JMS 600H-1  
Inlet: Direct Probe

Date Run: 07-05-2024 (Time Run: 16:26:38)

Run By: MASS LAB 104

Ionization mode: EI+

Scan: 30-32  
Base: m/z 217; 97.1%FS TIC: 9128409

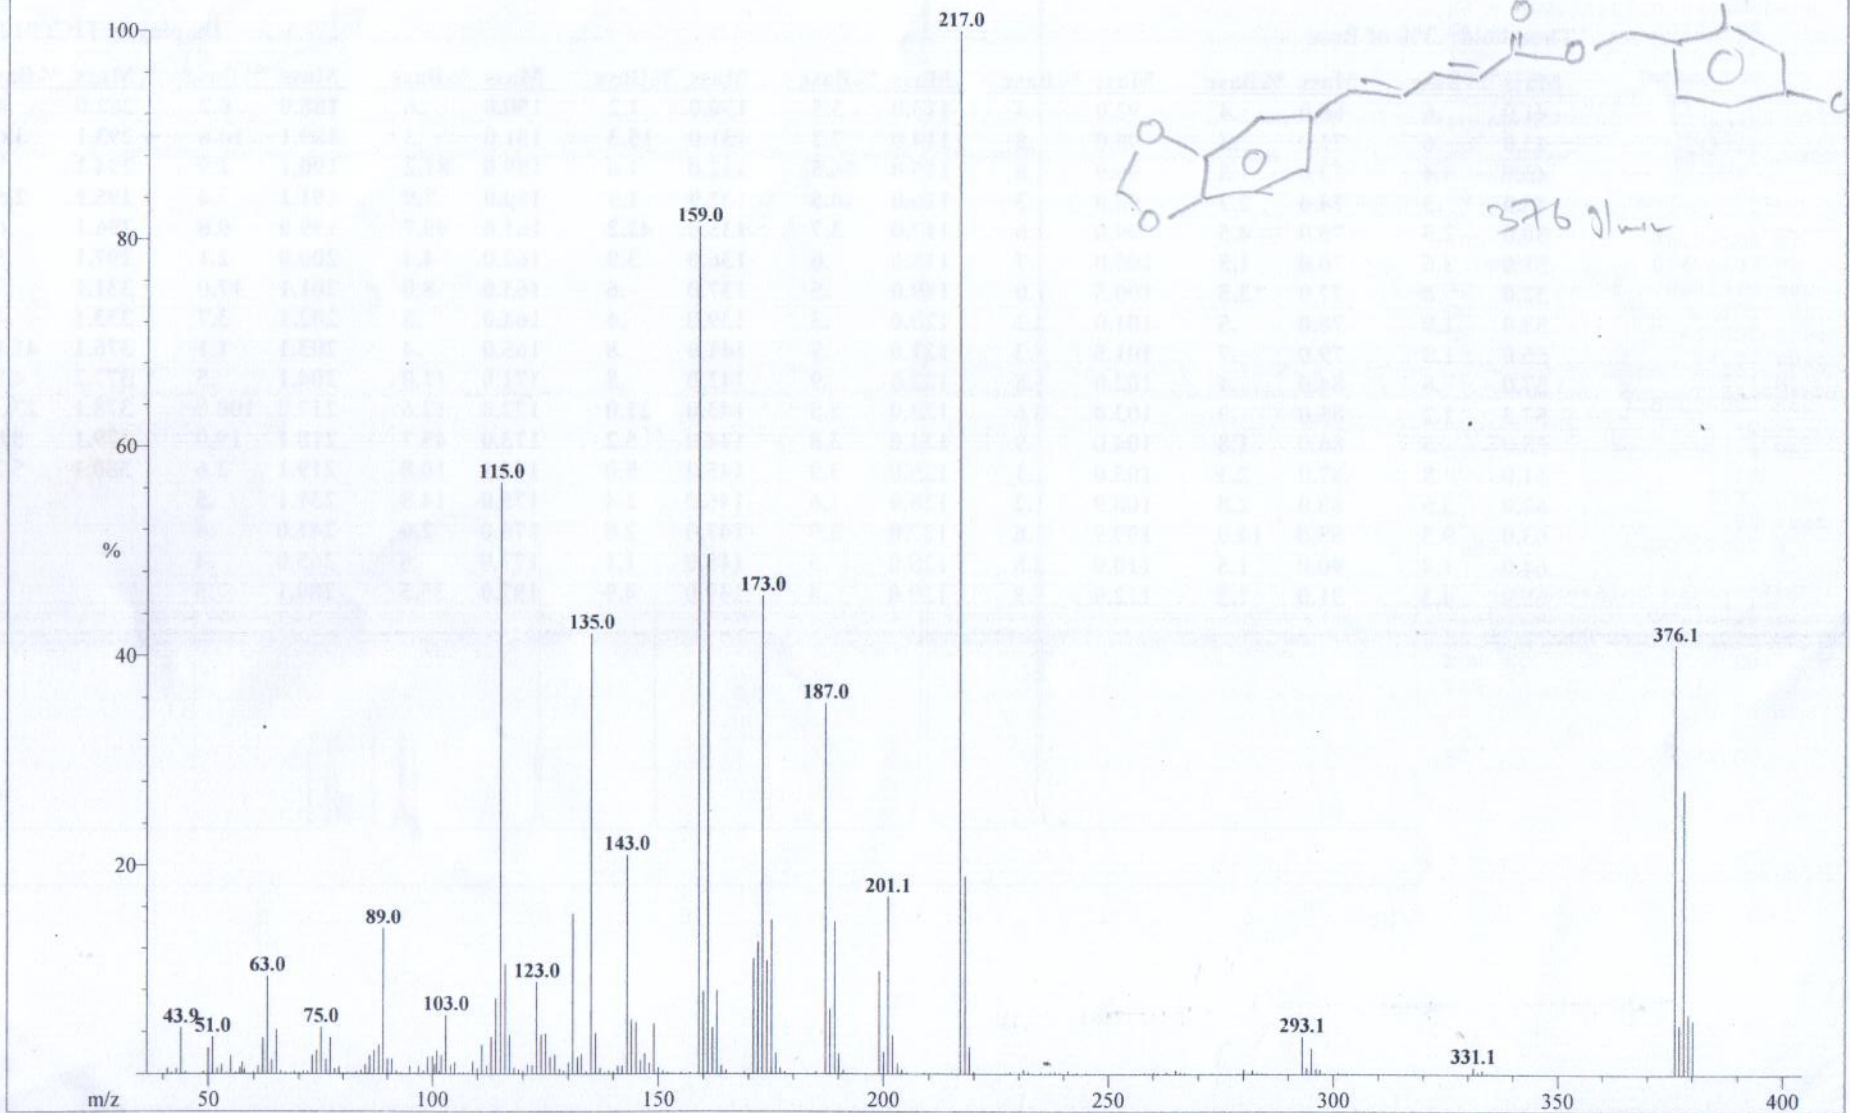

Compound 11

File: ASF-II-57a  
Sample: ASIF /PROF. DR. FARZANA  
Instrument: JEOL JMS 600H-1  
Inlet: Direct Probe

Date Run: 07-08-2024 (Time Run: 14:54:04)

Ionization mode: EI+

Run By: MASS LAB 104

Scan: 20  
Base: m/z 217; 35.8%FS TIC: 3092375

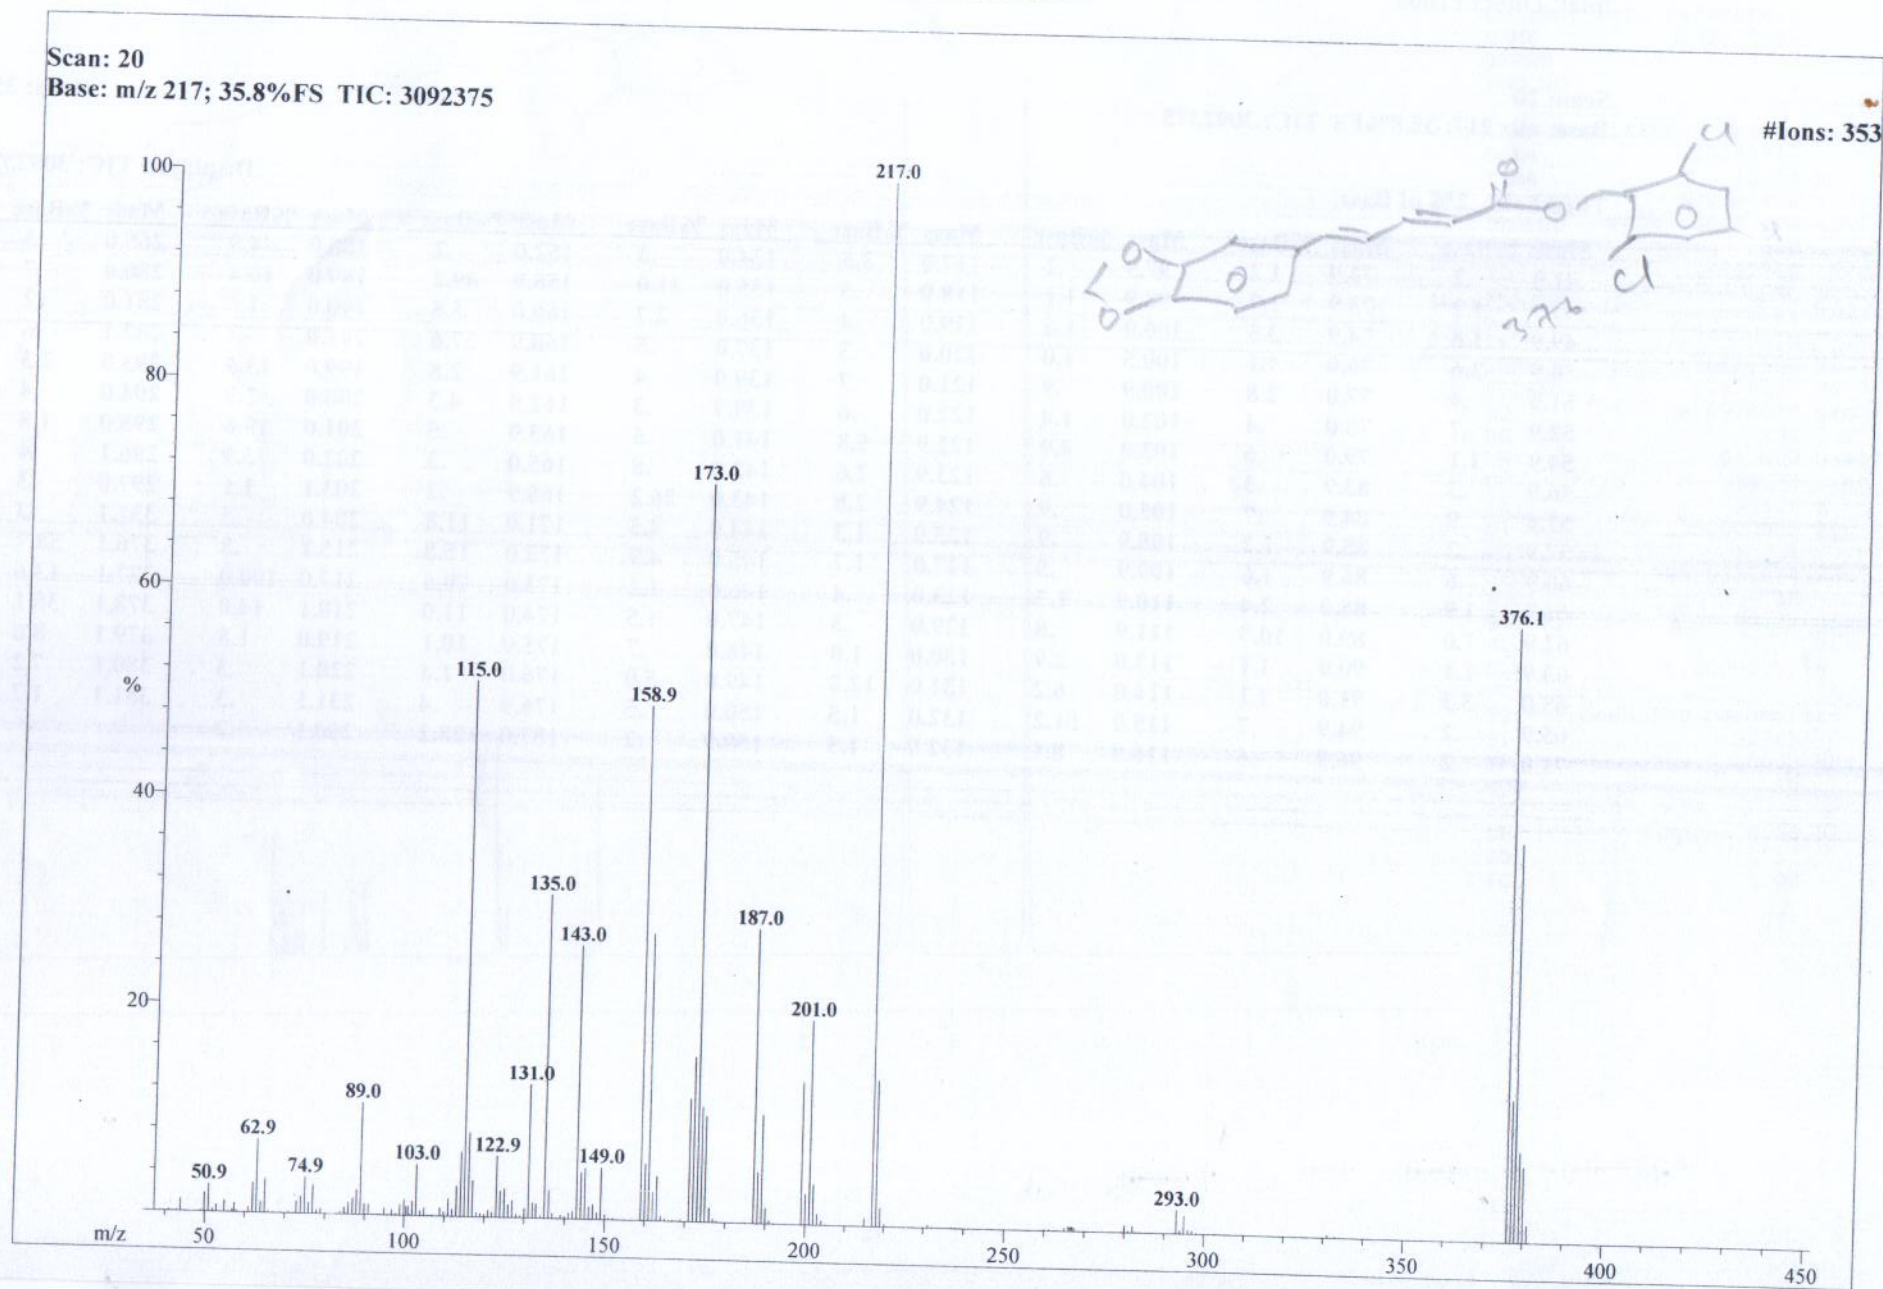

Compound 12

HEJ-ICCBS  
4/17/2024 12:51:55 PM

File: ASF-I-111a  
Sample: ASIF /PROF. DR. FARZANA  
Instrument: JEOL JMS 600H-1  
Inlet: Direct Probe

Date Run: 04-17-2024 (Time Run: 12:44:57)

Run By: MASS LAB 104

Ionization mode: EI+

Scan: 11

Base: m/z 218; 17.9%FS TIC: 1709136

#Ions: 240

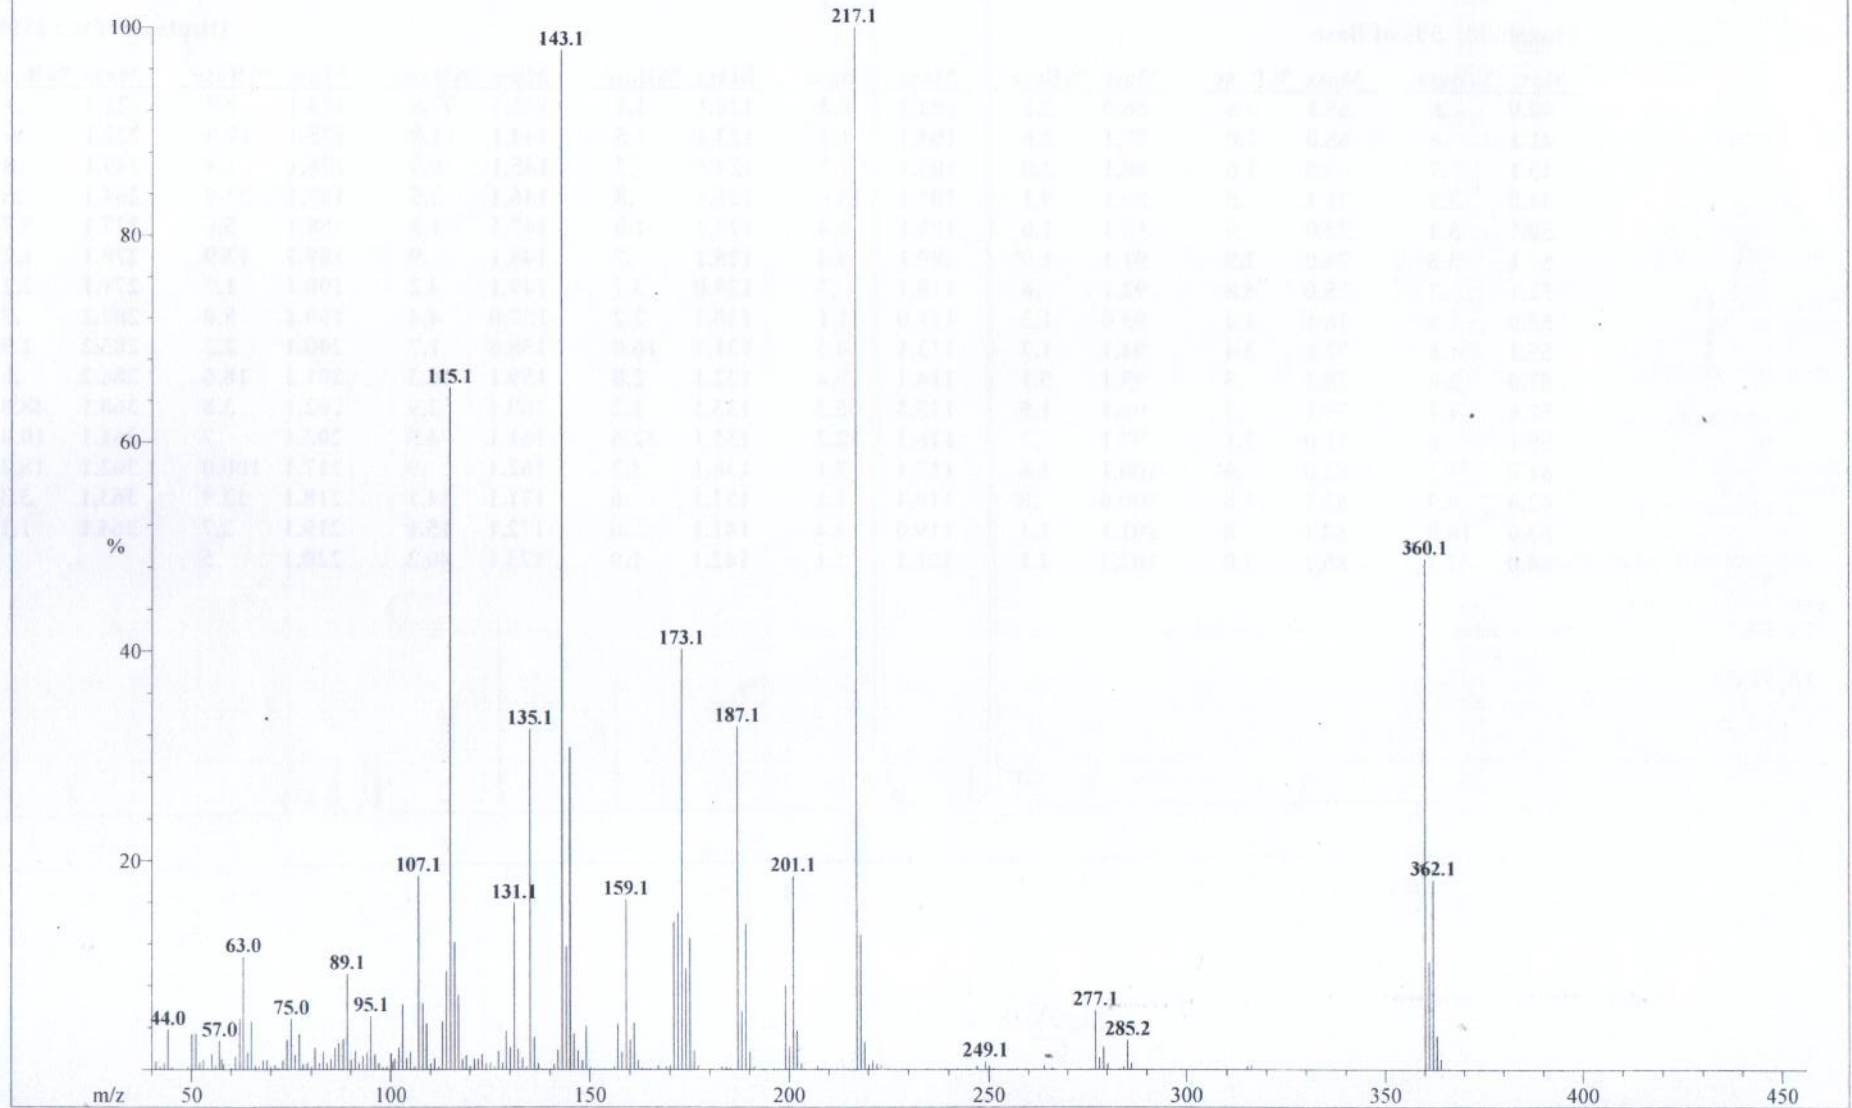

## Compound 13

File: ASF-I-109a

Date Run: 03-20-2024 (Time Run: 11:50:08)

Sample: ASIF / PROF.DR. FARZANA SHAHEEN

Instrument: JEOL JMS 600H-1

Inlet: Direct Probe

Ionization mode: EI+

Run By: MASS LAB 104

Scan: 9-11

Base: m/z 218; 30.9%FS TIC: 2836901

#Ions: 394

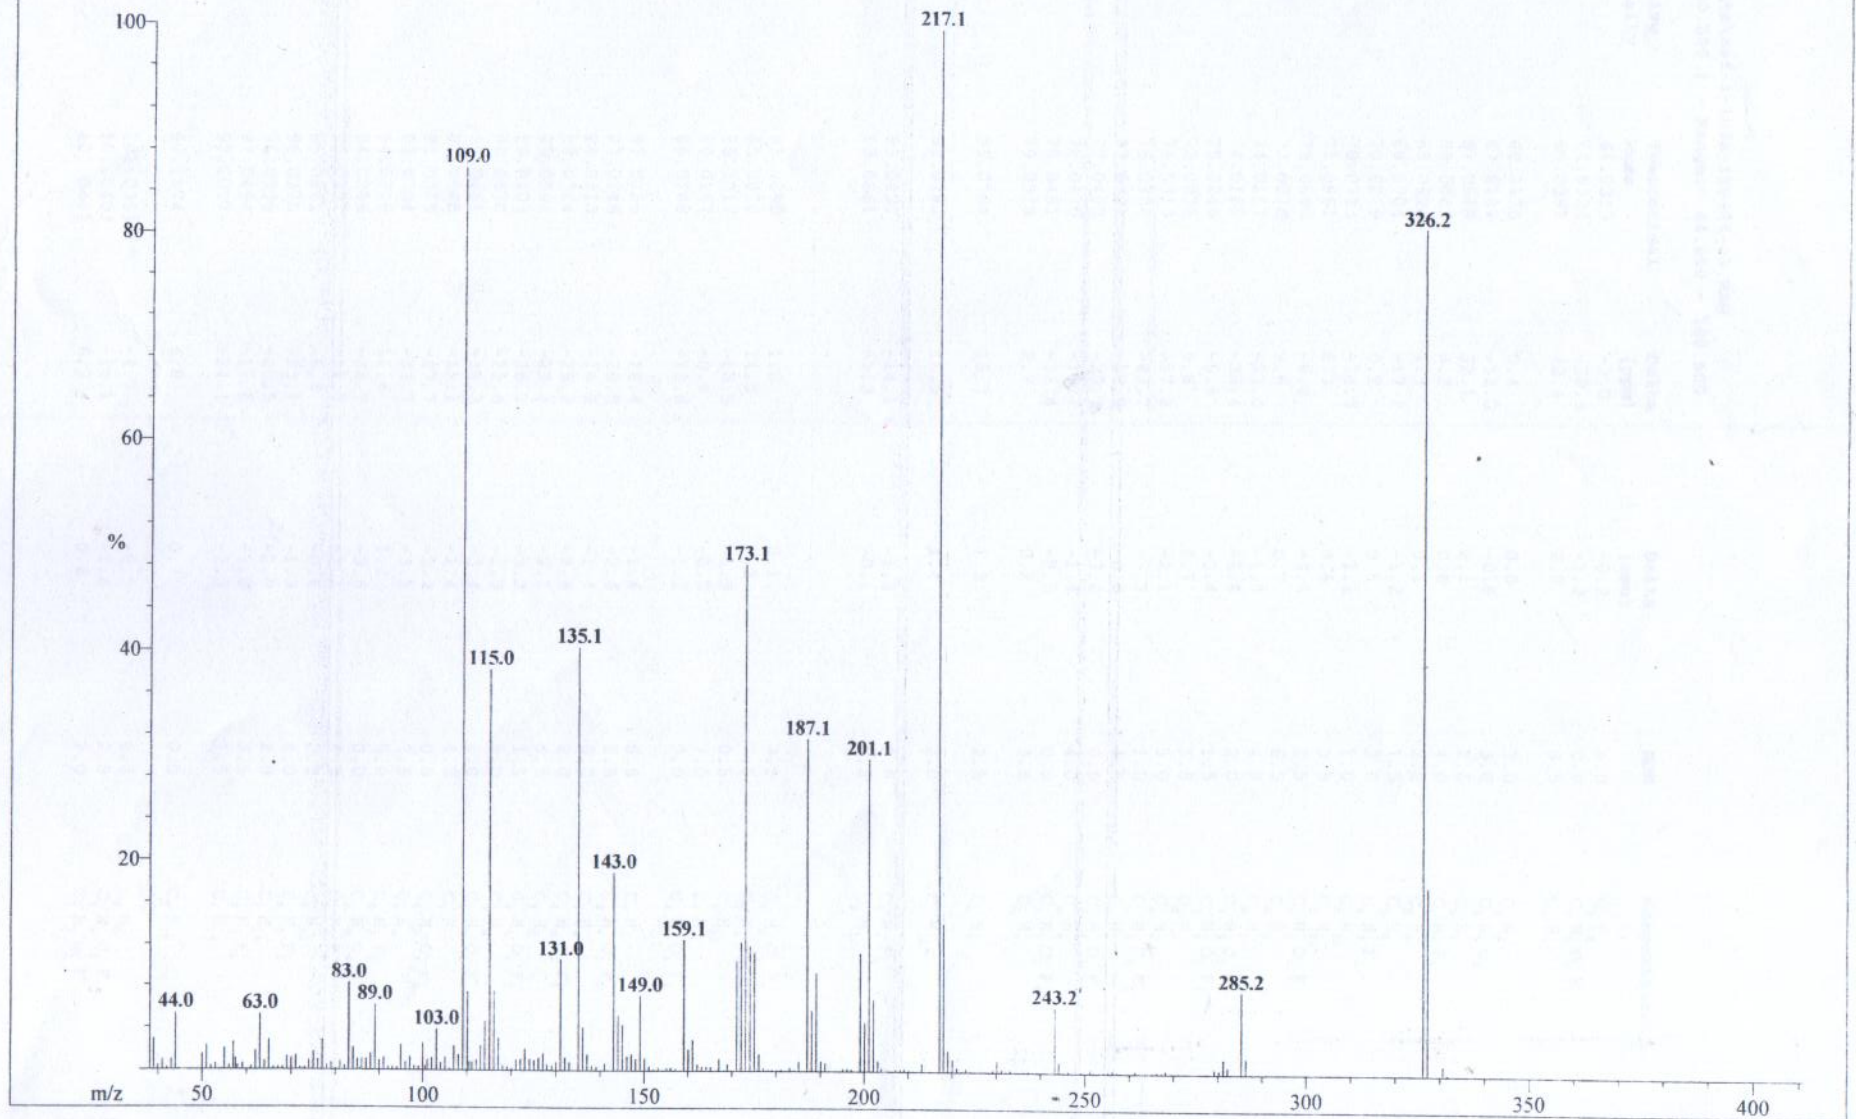

Compound 14

File: ASF-II-51a  
Sample: ASIF /PROF. DR. FARZANA  
Instrument: JEOL JMS 600H-1  
Inlet: Direct Probe

Date Run: 07-08-2024 (Time Run: 14:29:39)

Run By: MASS LAB 104

Ionization mode: EI+

Scan: 30

Base: m/z 376; 99.9%FS TIC: 8145338

#Ions: 374

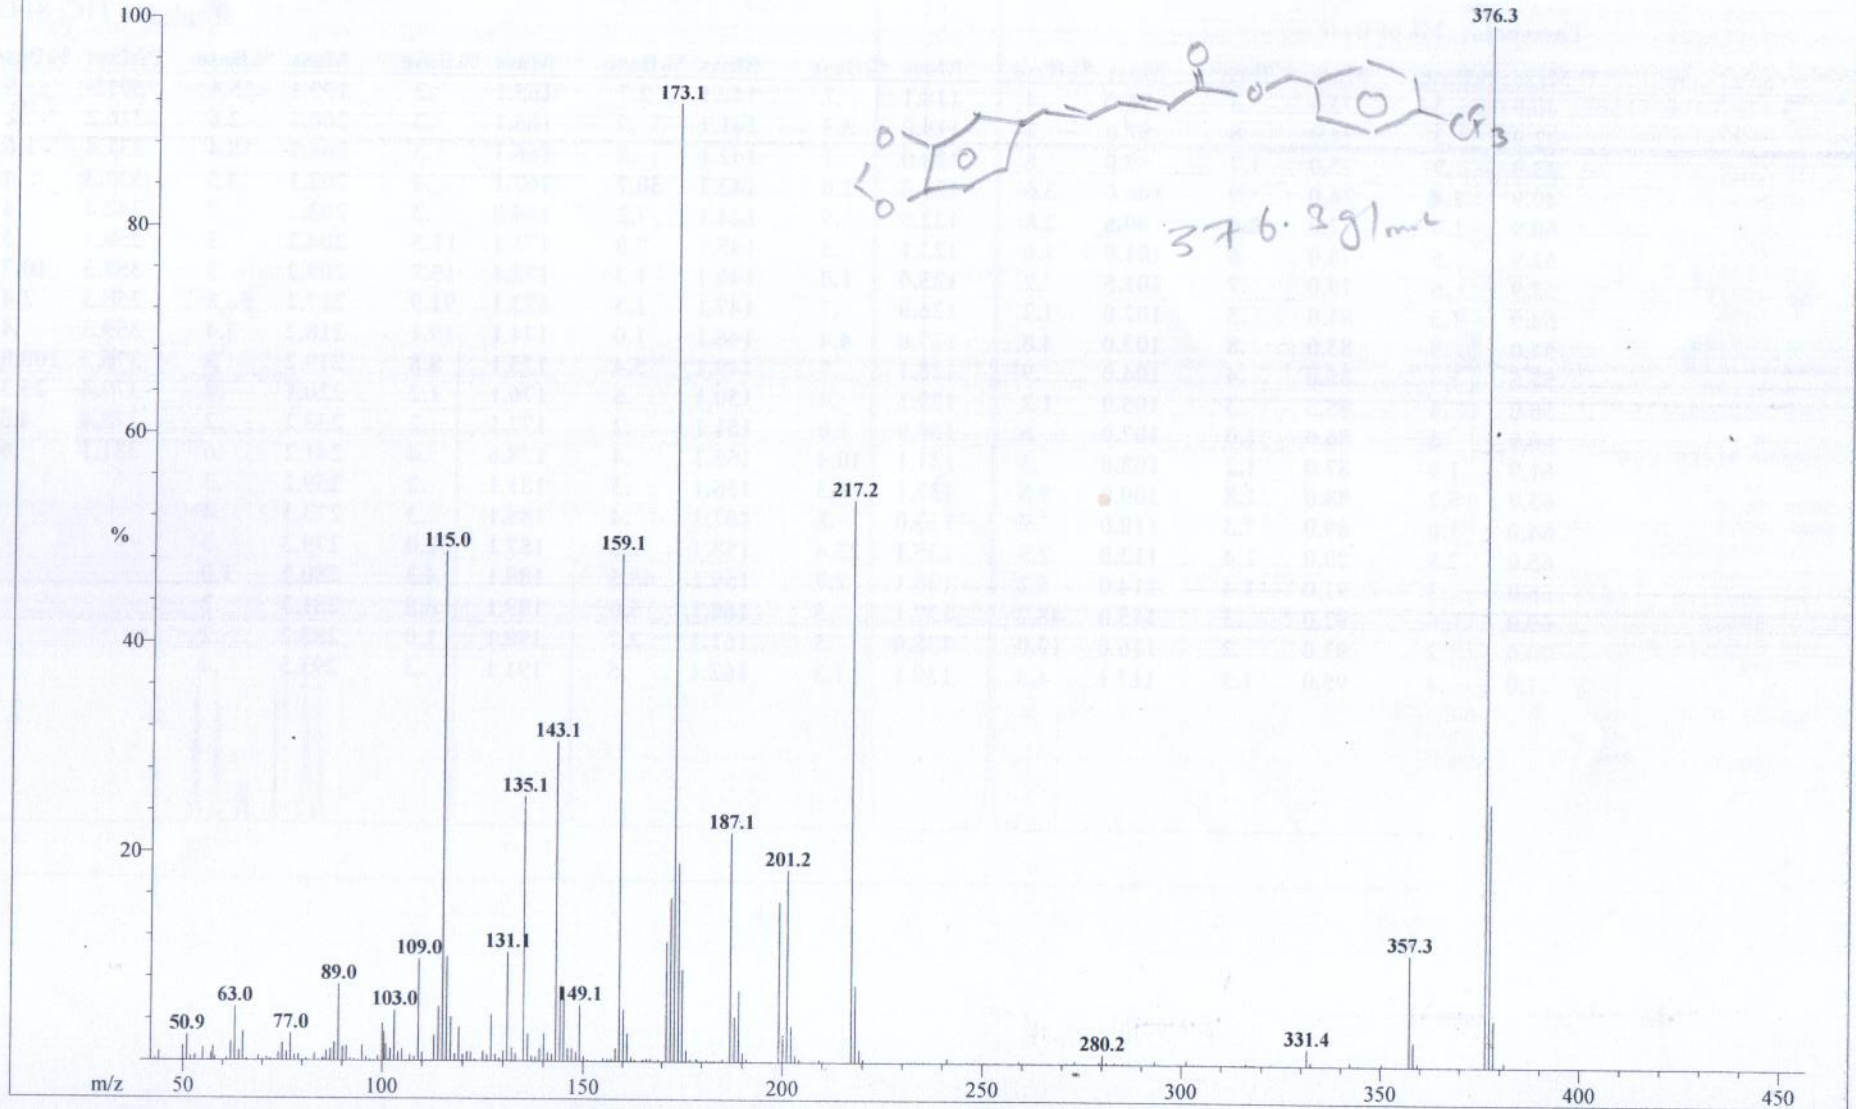

## Compound 15

File: ASF-II-61a

Date Run: 07-10-2024 (Time Run: 15:04:23)

Sample: ASIF /PROF. DR. FARZANA

Instrument: JEOL JMS 600H-1

Run By: MASS LAB 104

Inlet: Direct Probe

Ionization mode: EI+

Scan: 10-11

Base: m/z 376; 97.2%FS TIC: 9008717

#Ions: 363

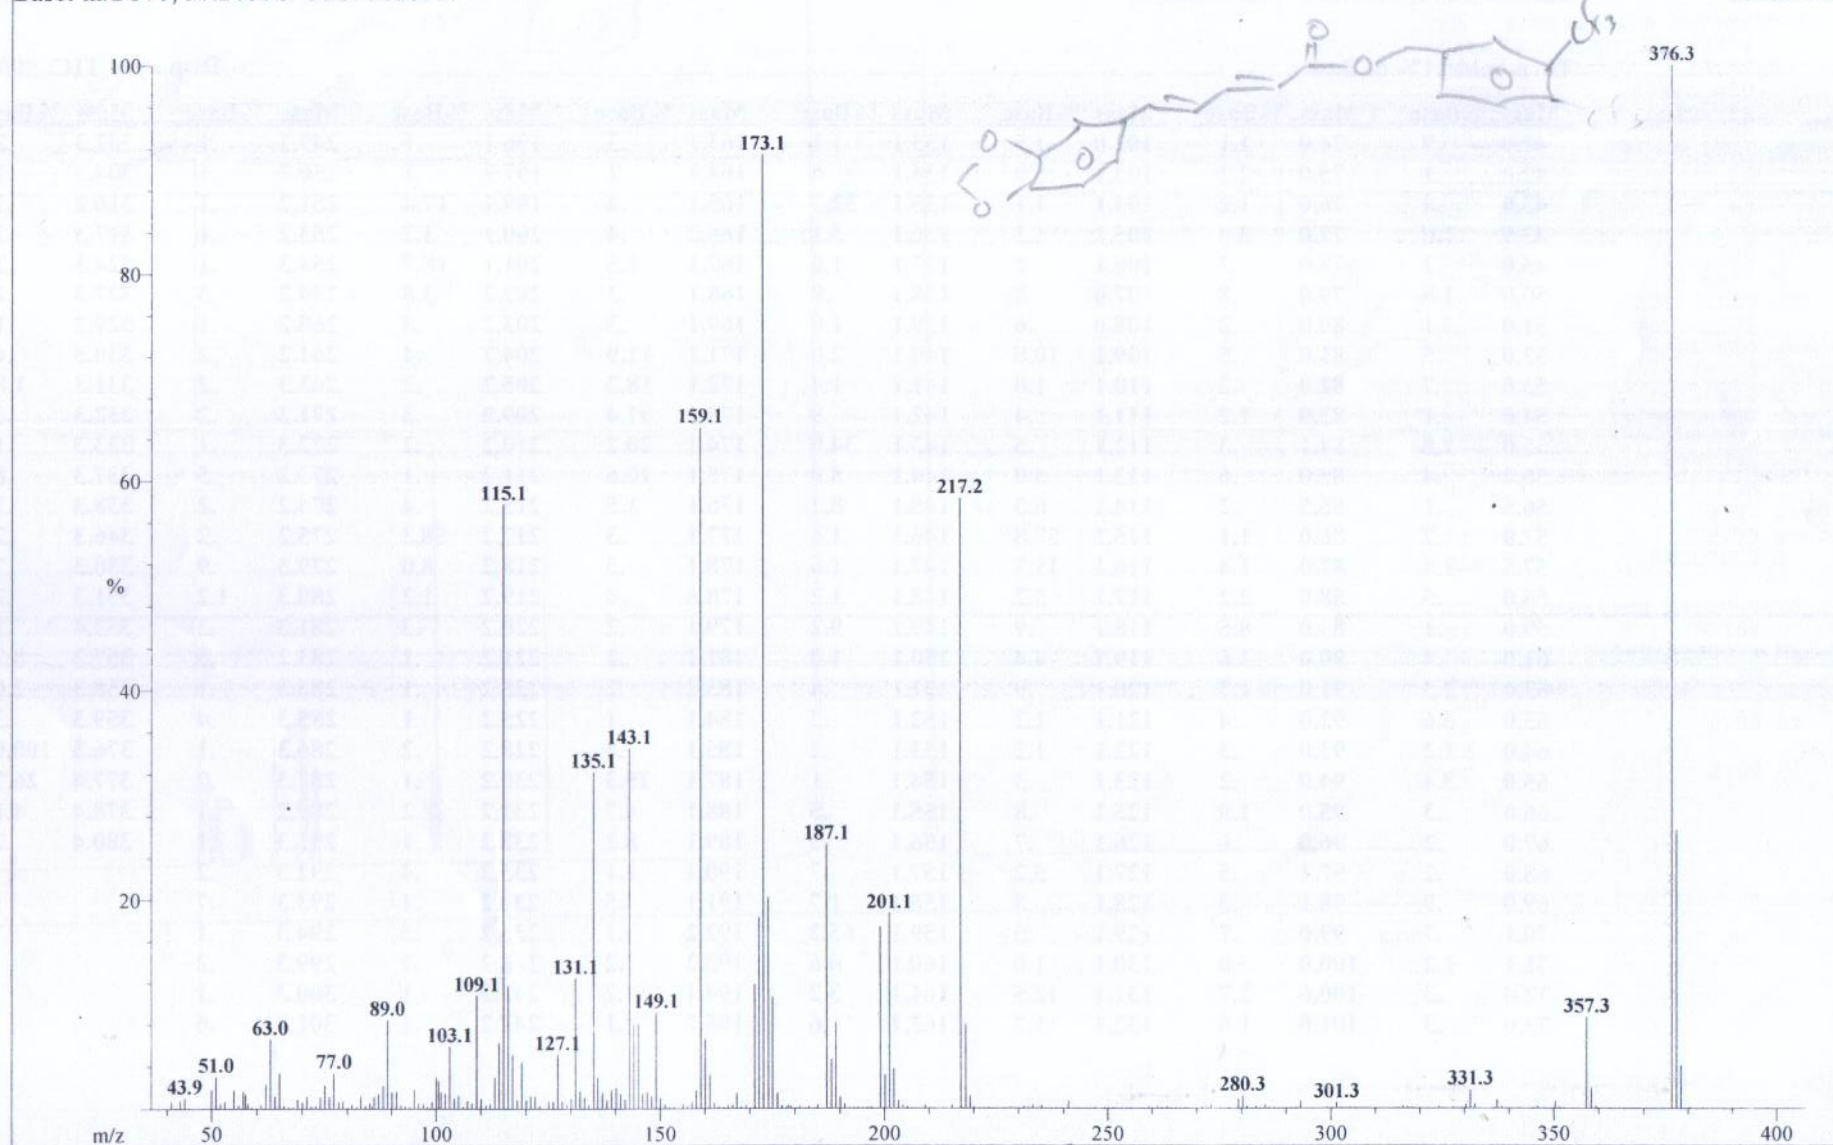

Compound 16

File: ASF-II-55a  
Sample: ASIF /PROF. DR. FARZANA  
Instrument: JEOL JMS 600H-1  
Inlet: Direct Probe

Date Run: 07-10-2024 (Time Run: 14:48:31)

Ionization mode: EI+

Run By: MASS LAB 104

Scan: 10-11  
Base: m/z 133; 99.9%FS TIC: 9306632

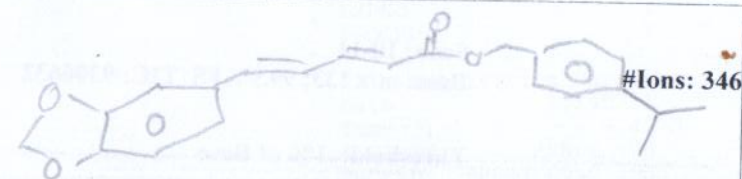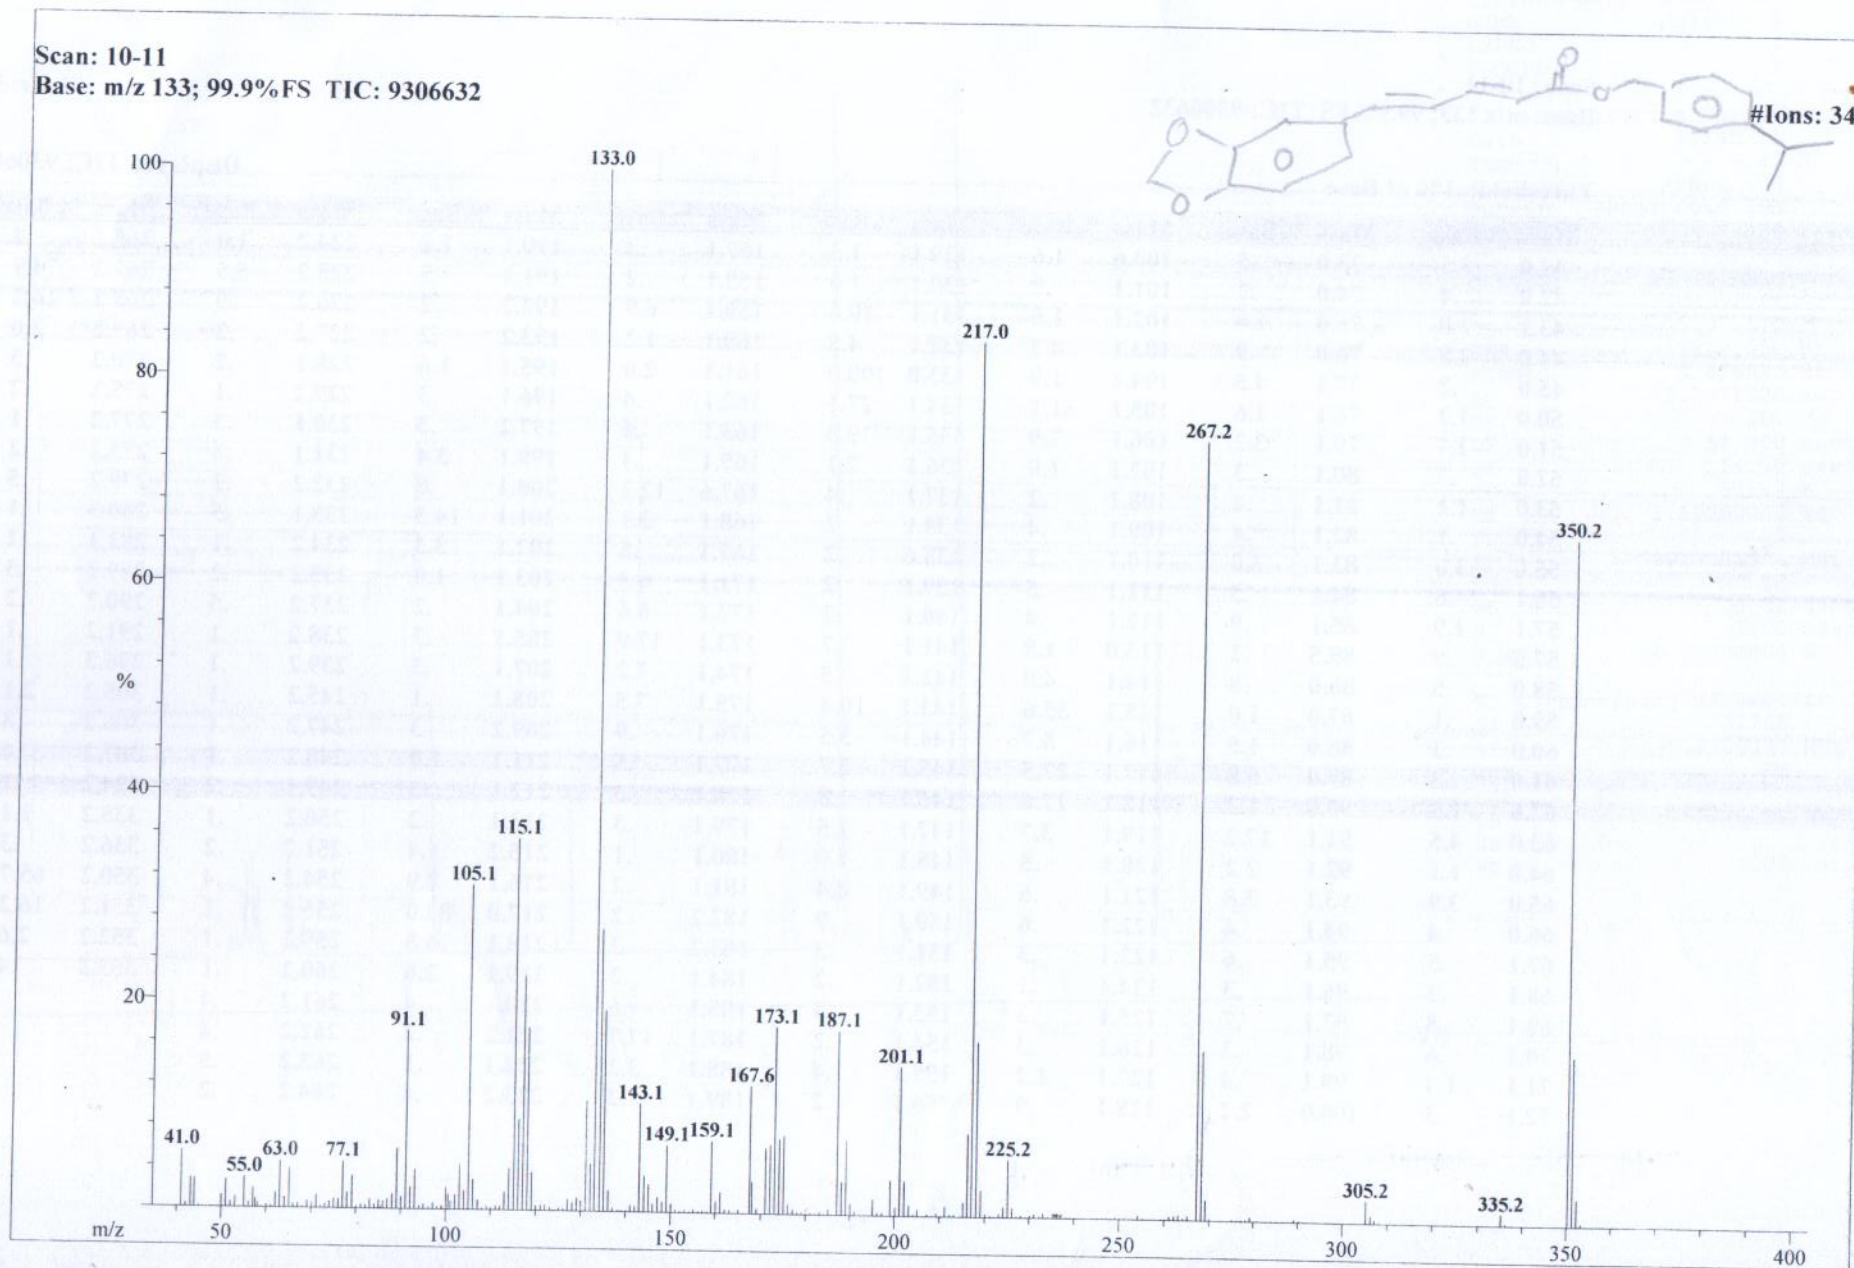

Compound 17

File: ASF-145a  
Sample: ASIF /PROF. DR. FARZANA  
Instrument: JEOL JMS 600H-1  
Inlet: Direct Probe

Date Run: 07-03-2024 (Time Run: 10:49:59)

Ionization mode: EI+

Run By: MASS LAB 104

Scan: 12

Base: m/z 218; 89.7%FS TIC: 5628234

#Ions: 502

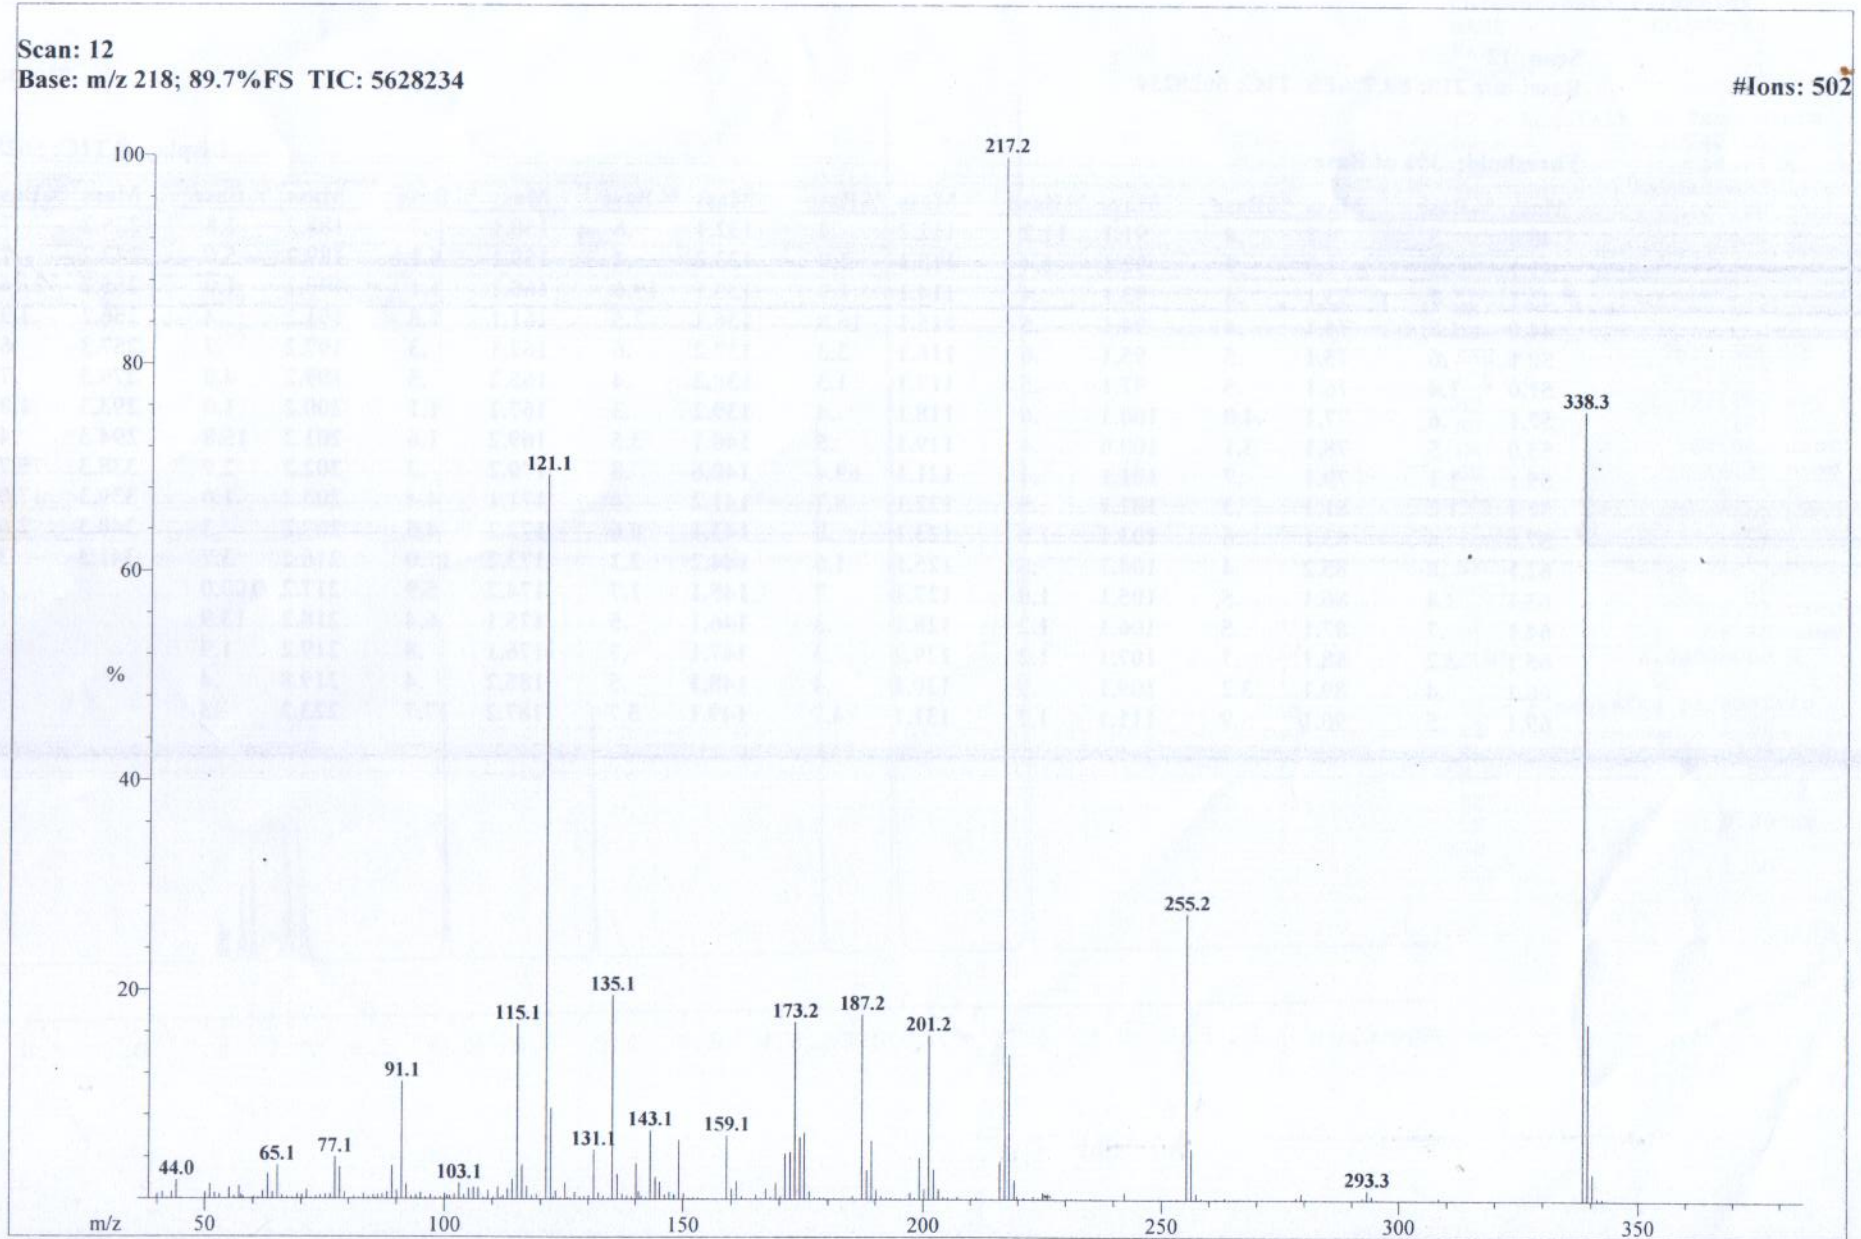

**Compound 18**

File: ASF-I-145a  
Sample: ASIF /PROF. DR. FARZANA  
Instrument: JEOL JMS 600H-1  
Inlet: Direct Probe

Date Run: 05-31-2024 (Time Run: 10:34:26)

Run By: MASS LAB 104

Ionization mode: EI+

Scan: 20-22  
Base: m/z 201; 14.9%FS TIC: 1610984

#Ions: 306

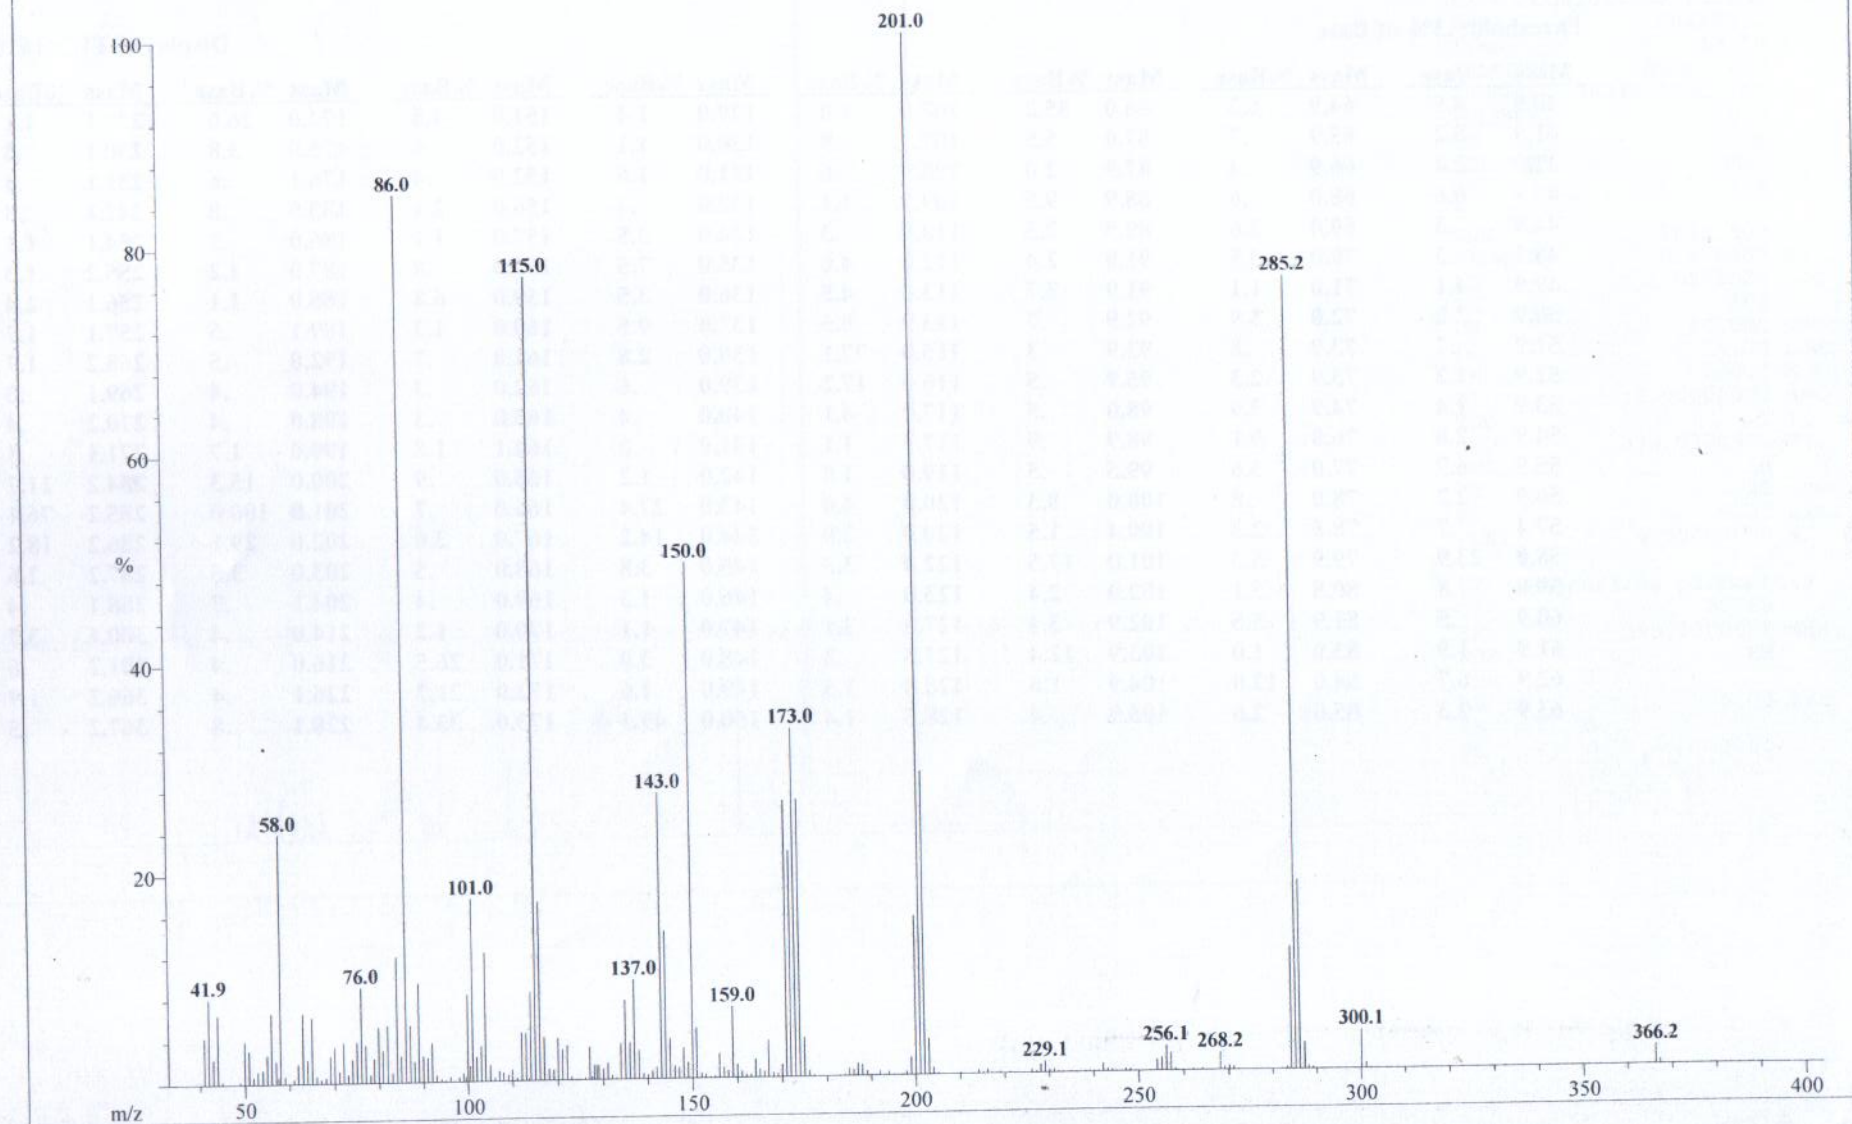

Compound 19

File: ASF-I-153a

Date Run: 06-06-2024 (Time Run: 15:06:50)

Sample: ASIF /PROF. DR. FARZANA

Instrument: JEOL JMS 600H-1

Run By: MASS LAB 104

Inlet: Direct Probe

Ionization mode: EI+

Scan: 16

Base: m/z 153; 13.3%FS TIC: 824344

#Ions: 232

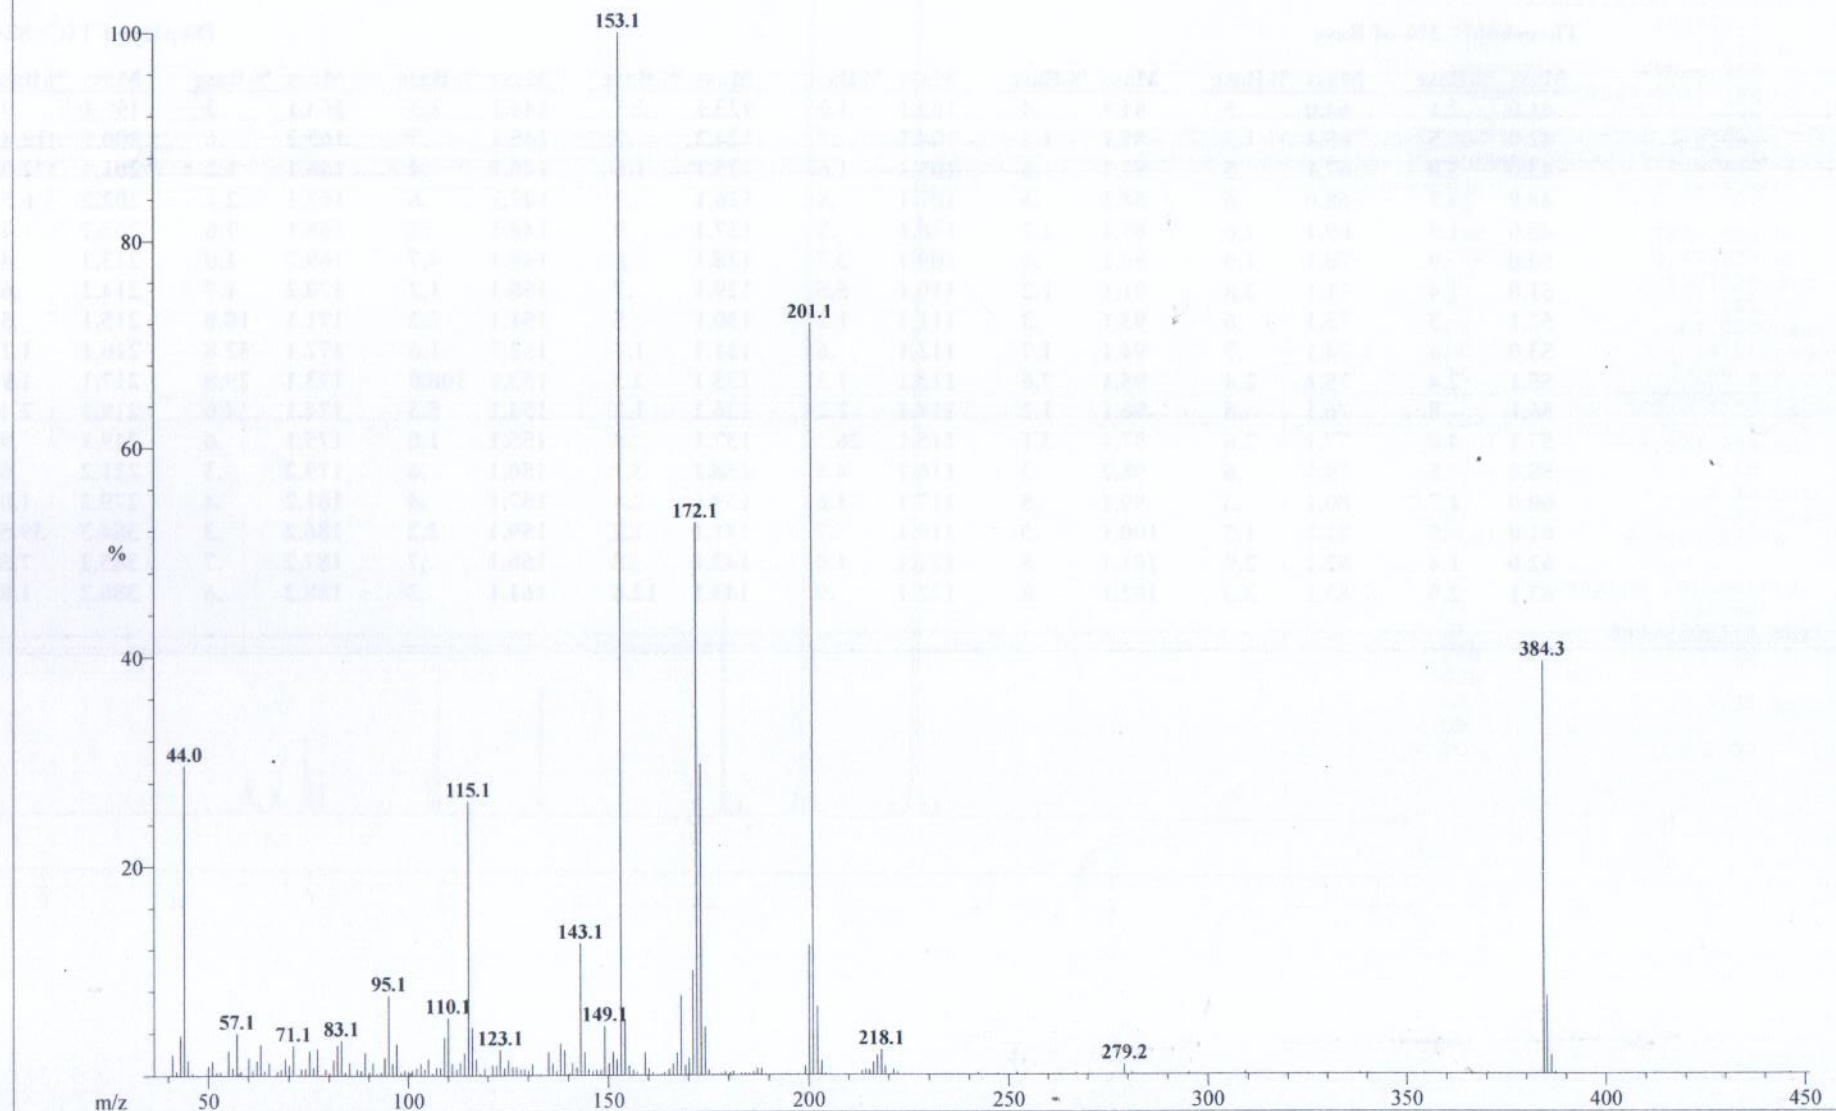

Compound 20

HEJ-ICCBS  
6/6/2024 3:41:35 PM

File: ASF-I-151a  
Sample: ASIF /PROF. DR. FARZANA  
Instrument: JEOL JMS 600H-1  
Inlet: Direct Probe

Date Run: 06-06-2024 (Time Run: 15:33:41)

Run By: MASS LAB 104

Ionization mode: EI+

Scan: 12

Base: m/z 201; 29.5%FS TIC: 2199673

#Ions: 511

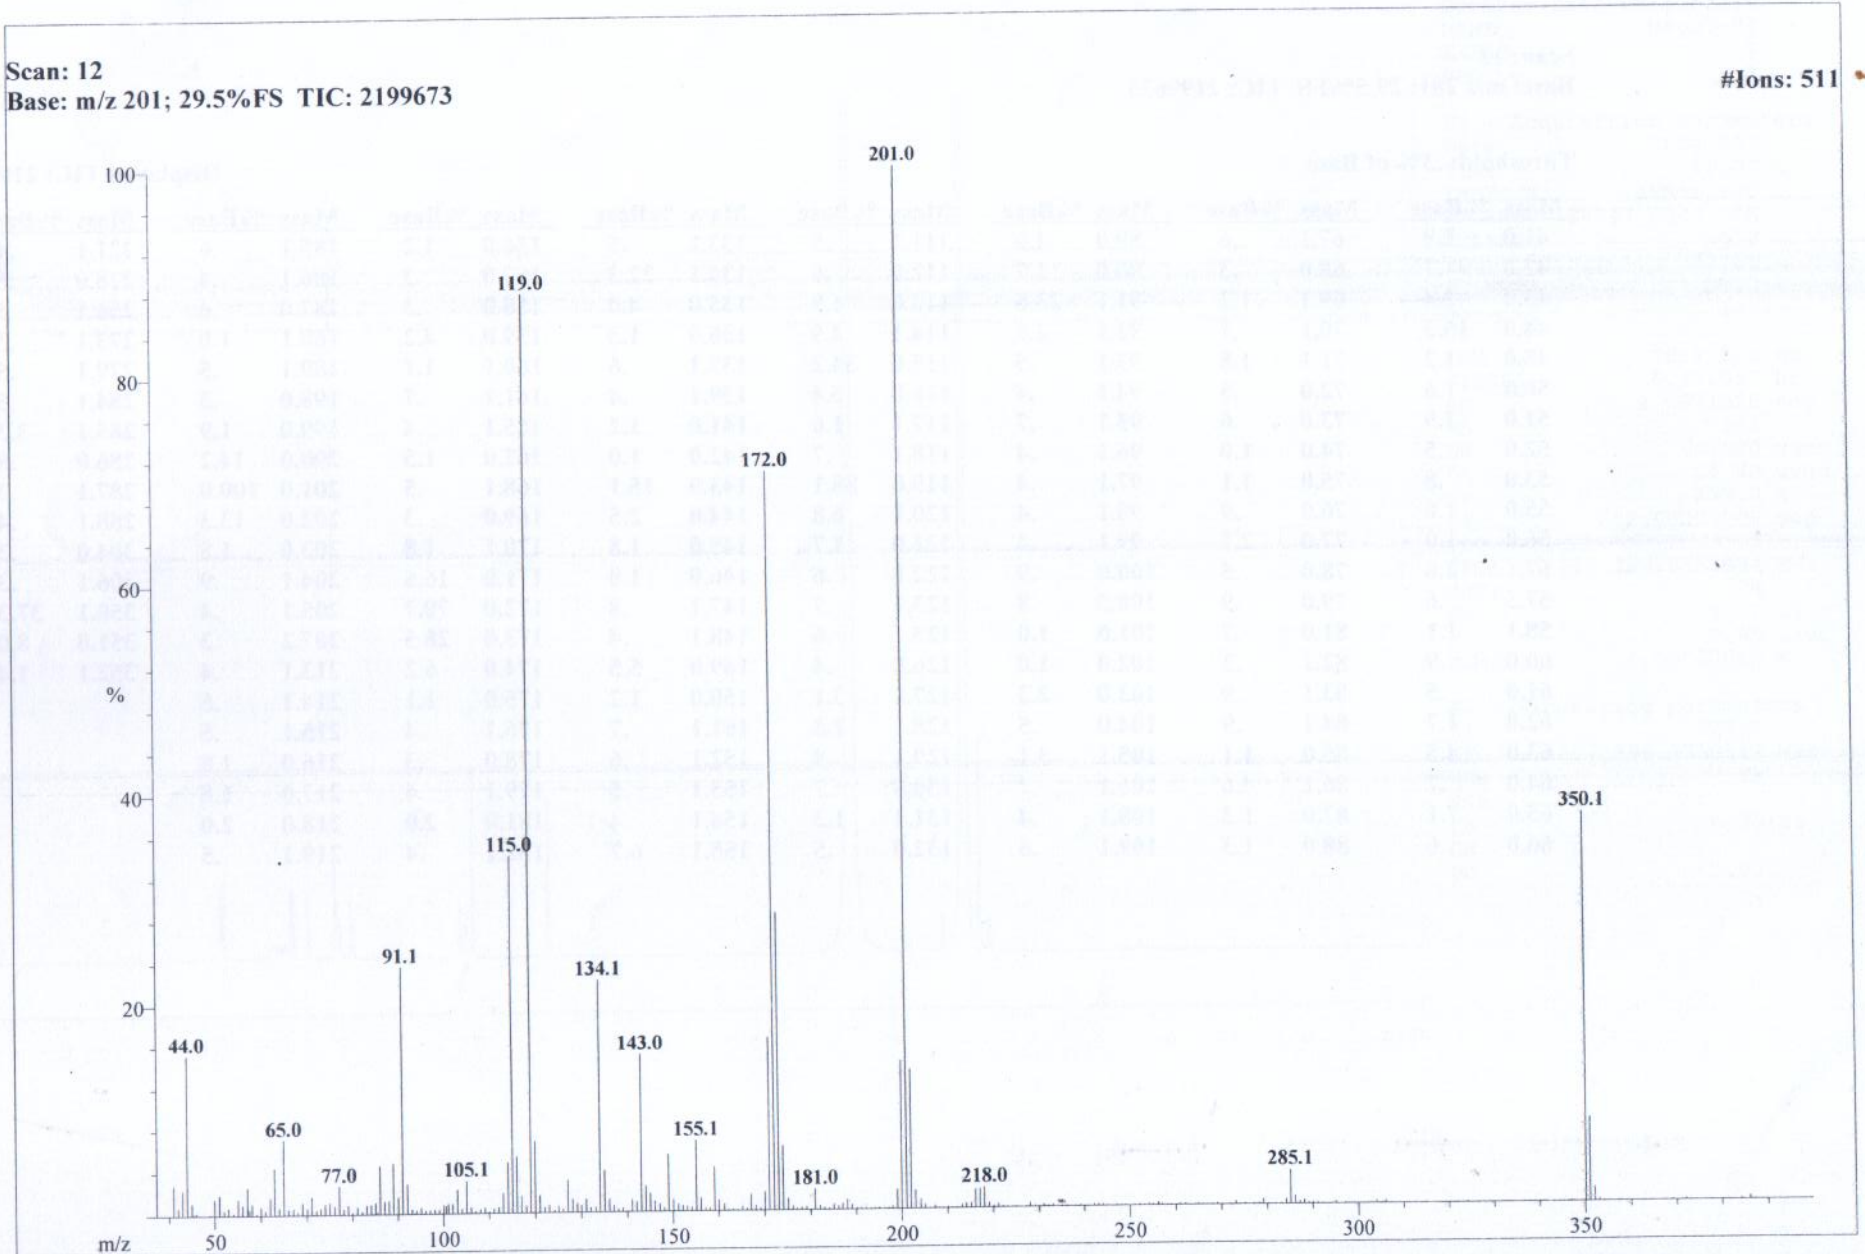

Compound 21

File: ASF-I-155a  
Sample: ASIF /PROF. DR. FARZANA  
Instrument: JEOL JMS 600H-1  
Inlet: Direct Probe

Date Run: 06-06-2024 (Time Run: 14:53:37)

Run By: MASS LAB 104

Ionization mode: EI+

Scan: 15

Base: m/z 173; 42.7%FS TIC: 2443270

#Ions: 314

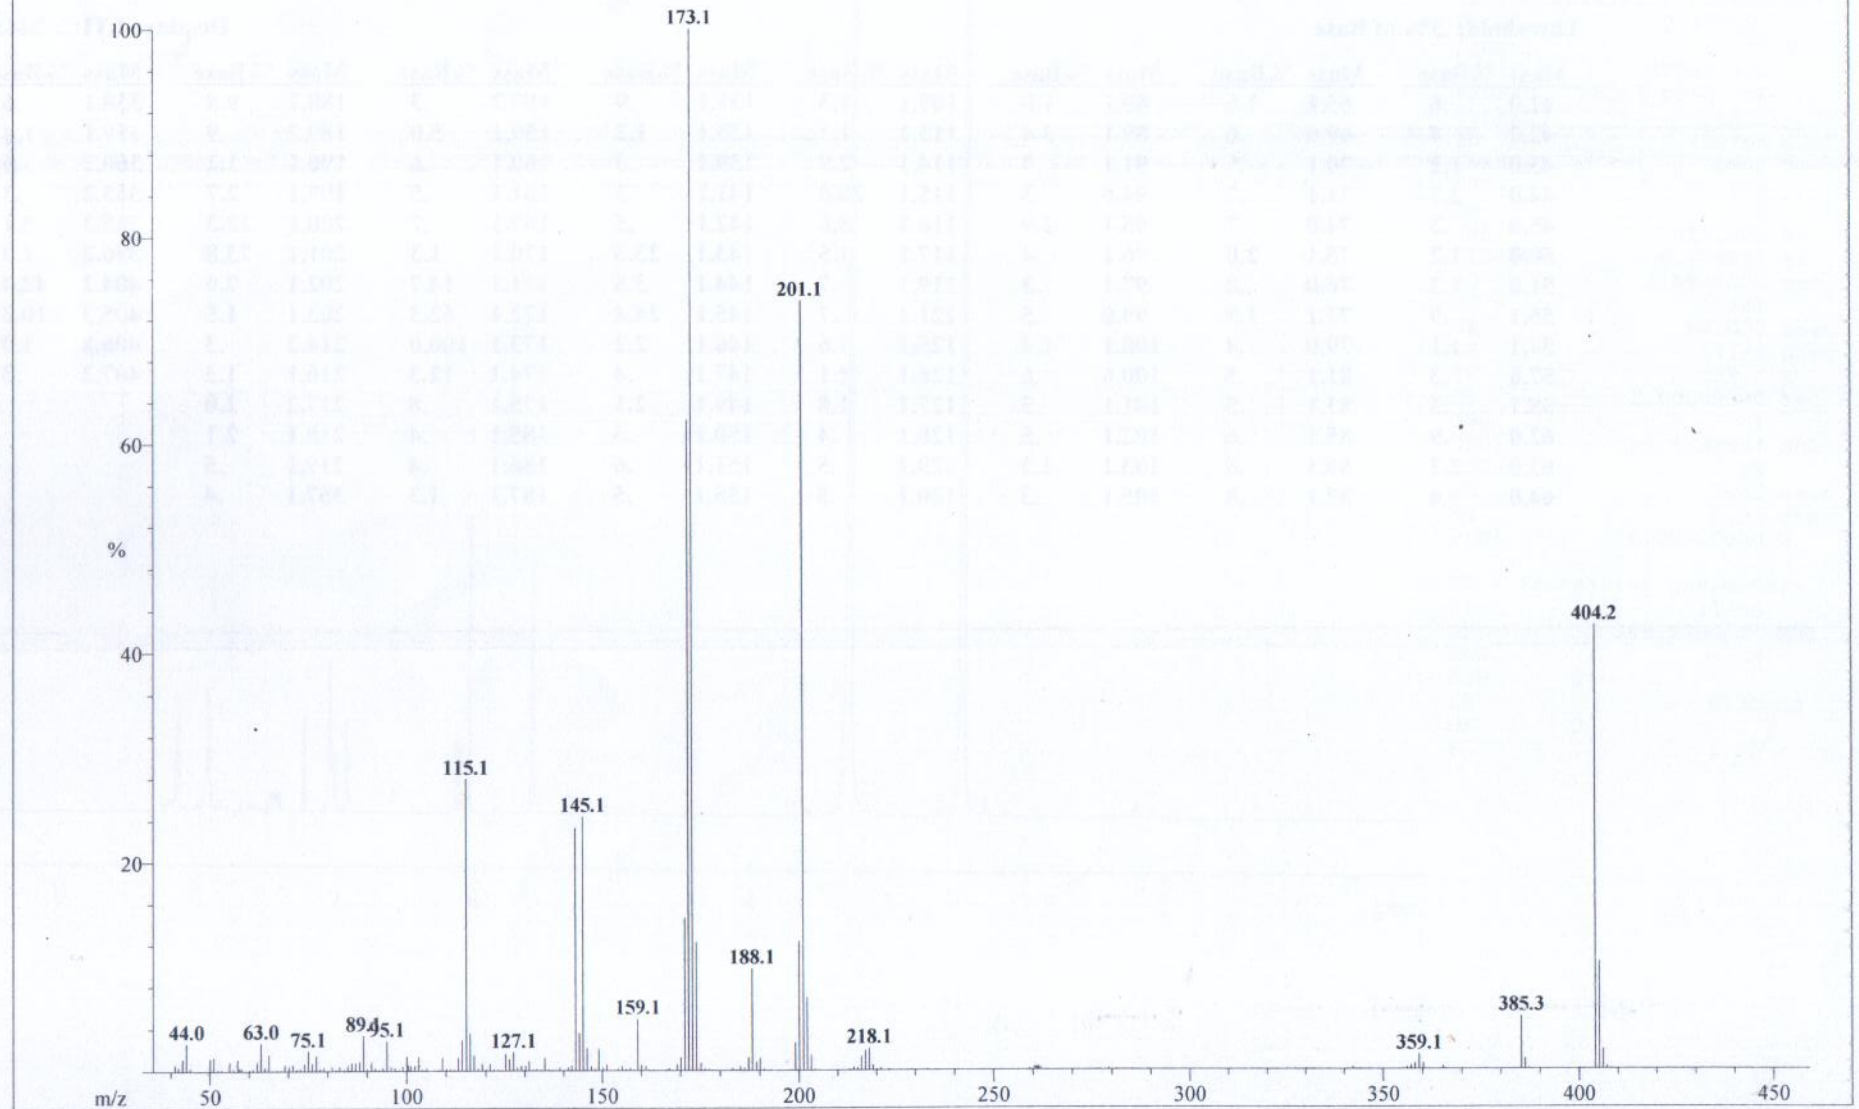

Compound 22

File: ASF-I-149a

Date Run: 06-06-2024 (Time Run: 14:39:46)

Sample: ASIF /PROF. DR. FARZANA

Instrument: JEOL JMS 600H-1

Run By: MASS LAB 104

Inlet: Direct Probe

Ionization mode: EI+

Scan: 17

Base: m/z 201; 75%FS TIC: 5354730

#Ions: 518

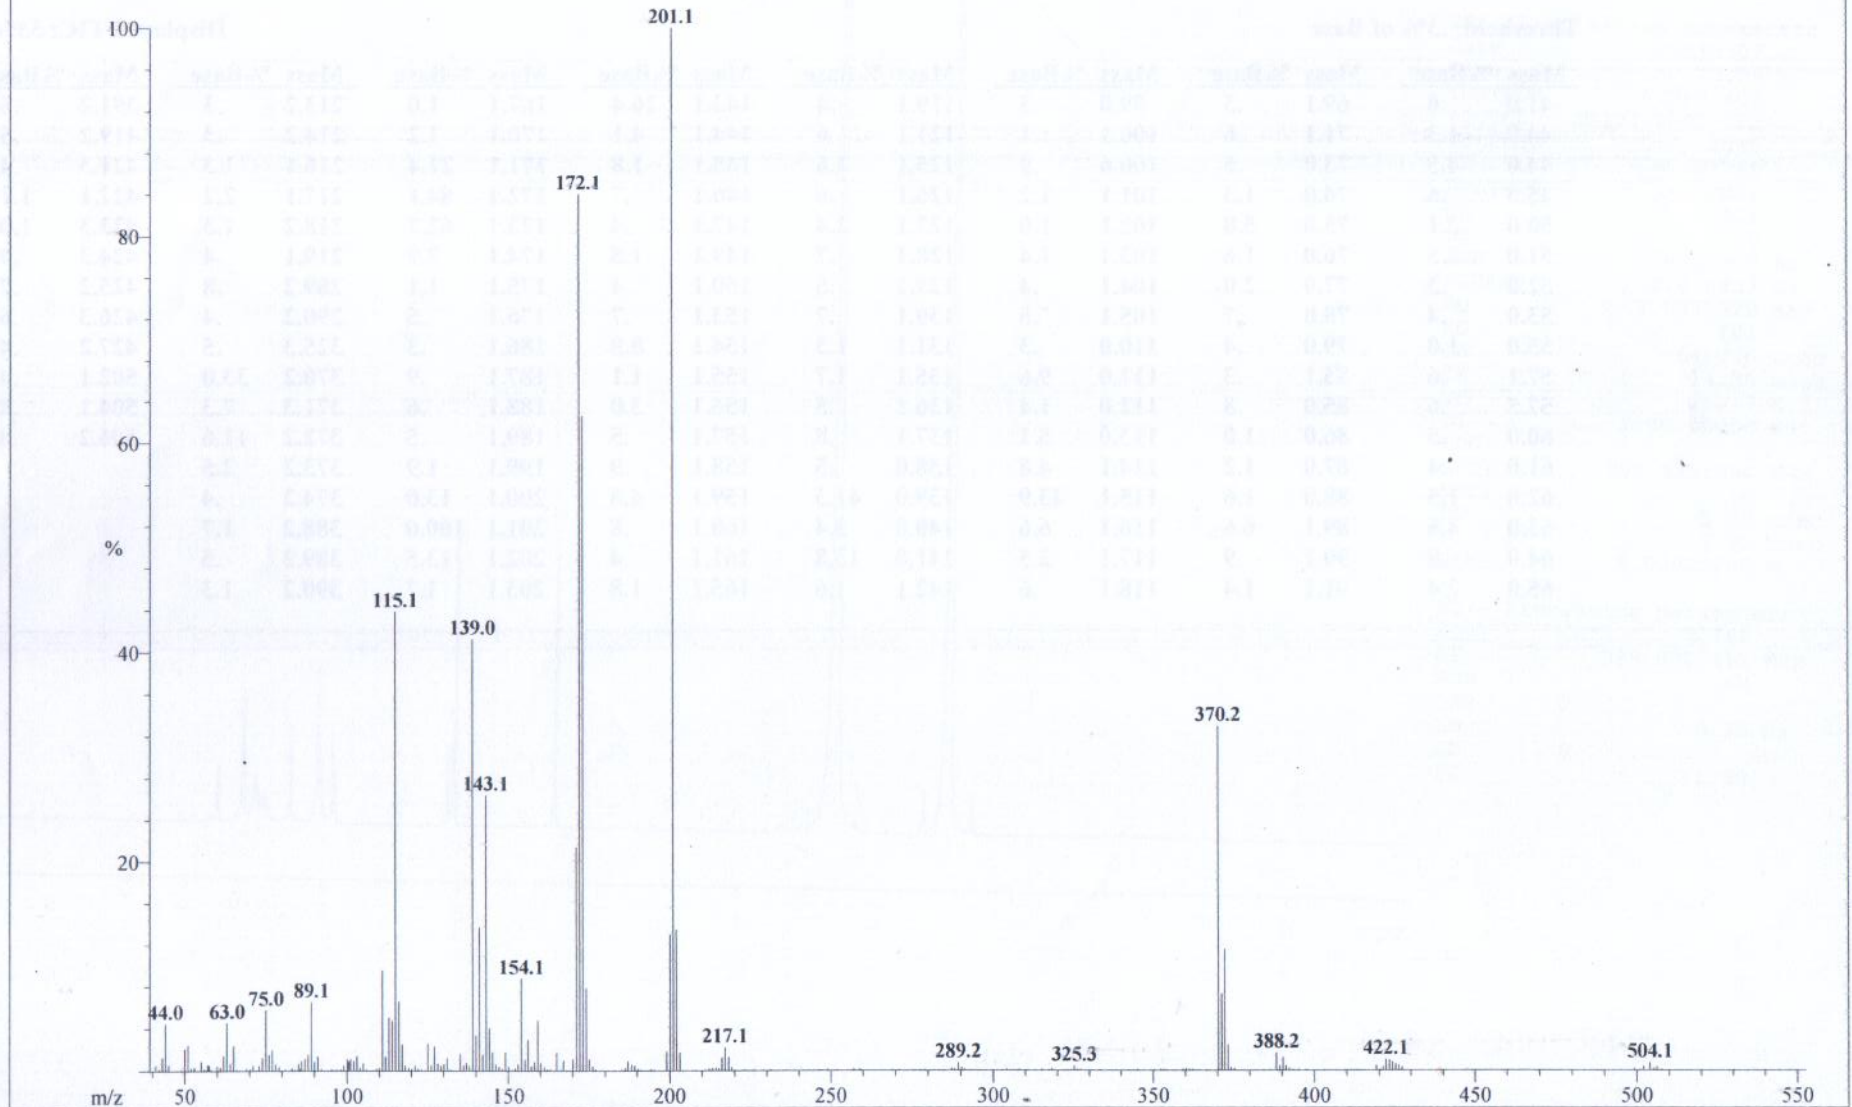

**Compound 23**

File: ASF-I-159a  
Sample: ASIF /PROF. DR. FARZANA  
Instrument: JEOL JMS 600H-1  
Inlet: Direct Probe

Date Run: 06-06-2024 (Time Run: 15:54:04)

Ionization mode: EI+

Run By: MASS LAB 104

Scan: 47

Base: m/z 172; 99.9%FS TIC: 6934554

#Ions: 742

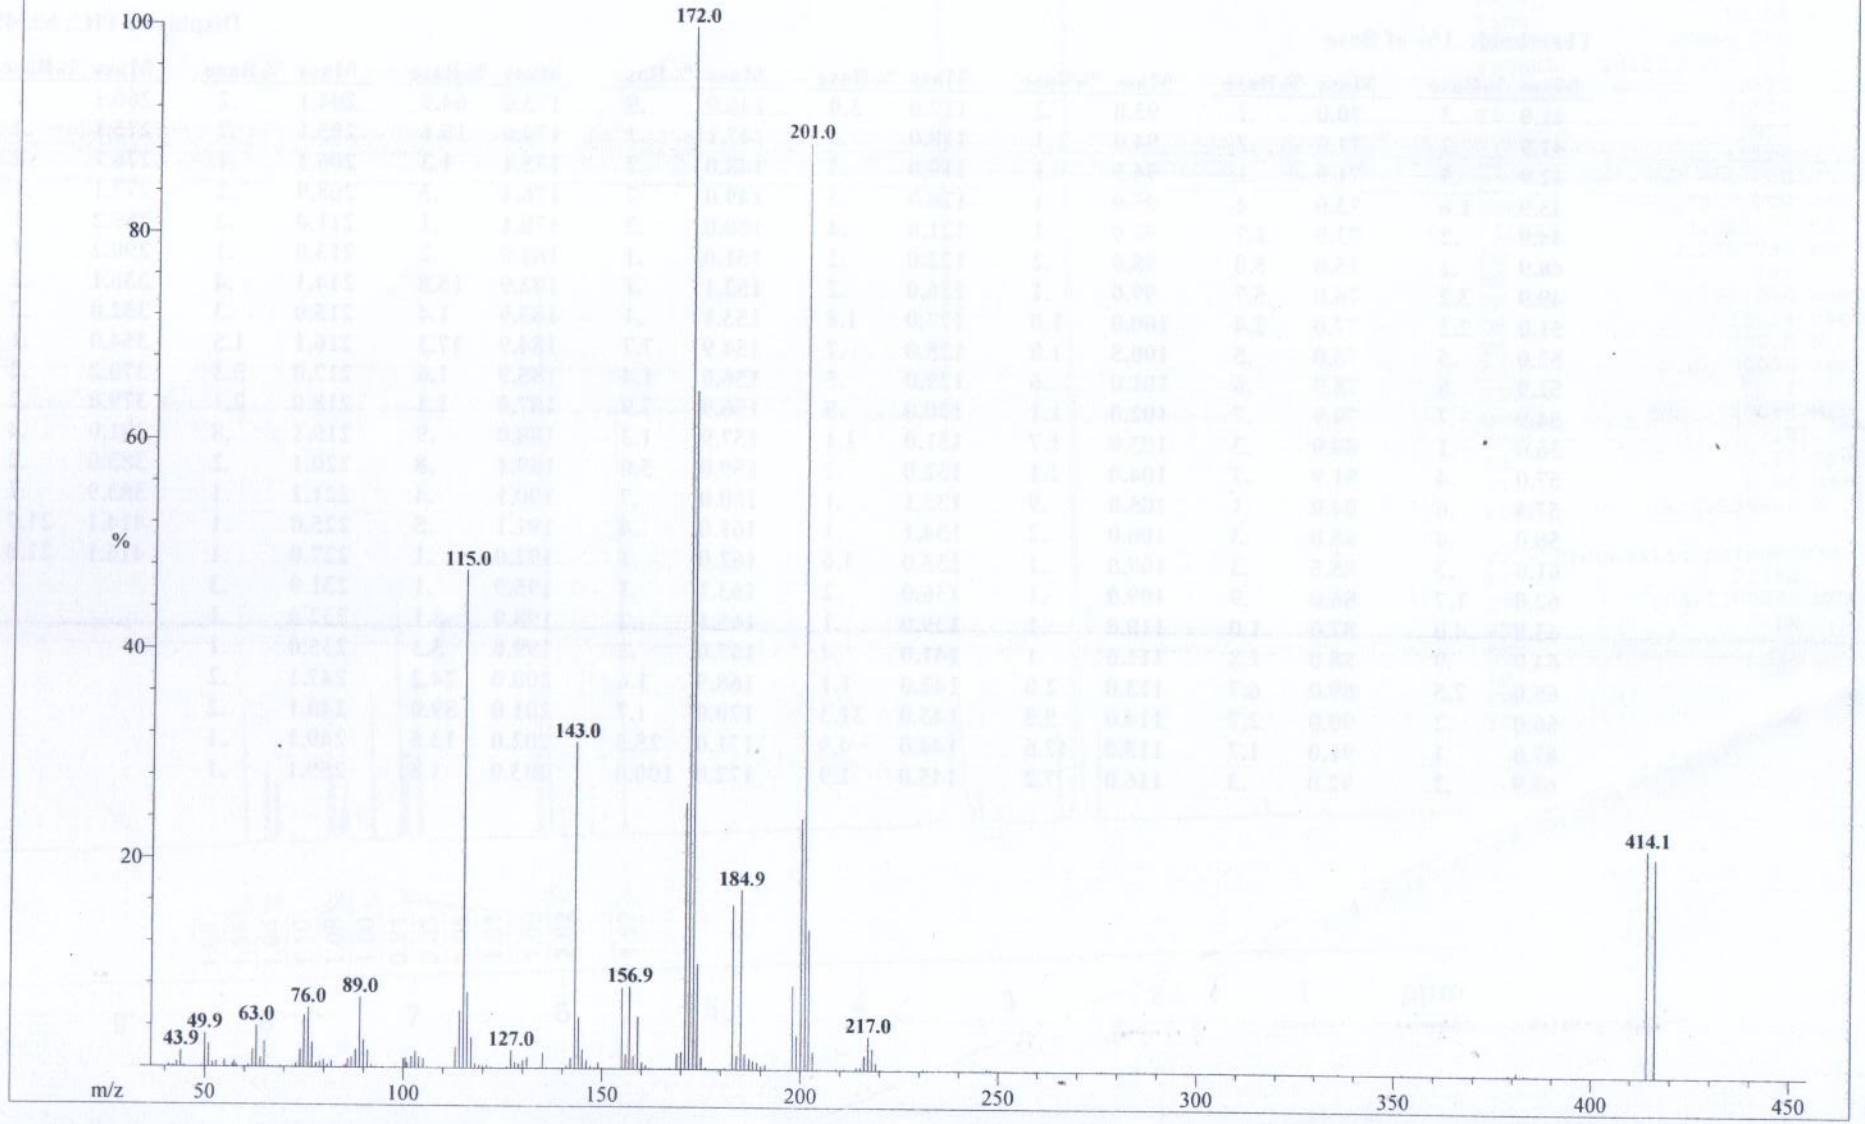

## Compound 24

File: ASF-II-43a

Date Run: 07-01-2024 (Time Run: 15:13:48)

Sample: ASIF /PROF. DR. FARZANA

Instrument: JEOL JMS 600H-1

Run By: MASS LAB 104

Inlet: Direct Probe

Ionization mode: EI+

Scan: 14-16

Base: m/z 217; 99.9%FS TIC: 6729201

#Ions: 444

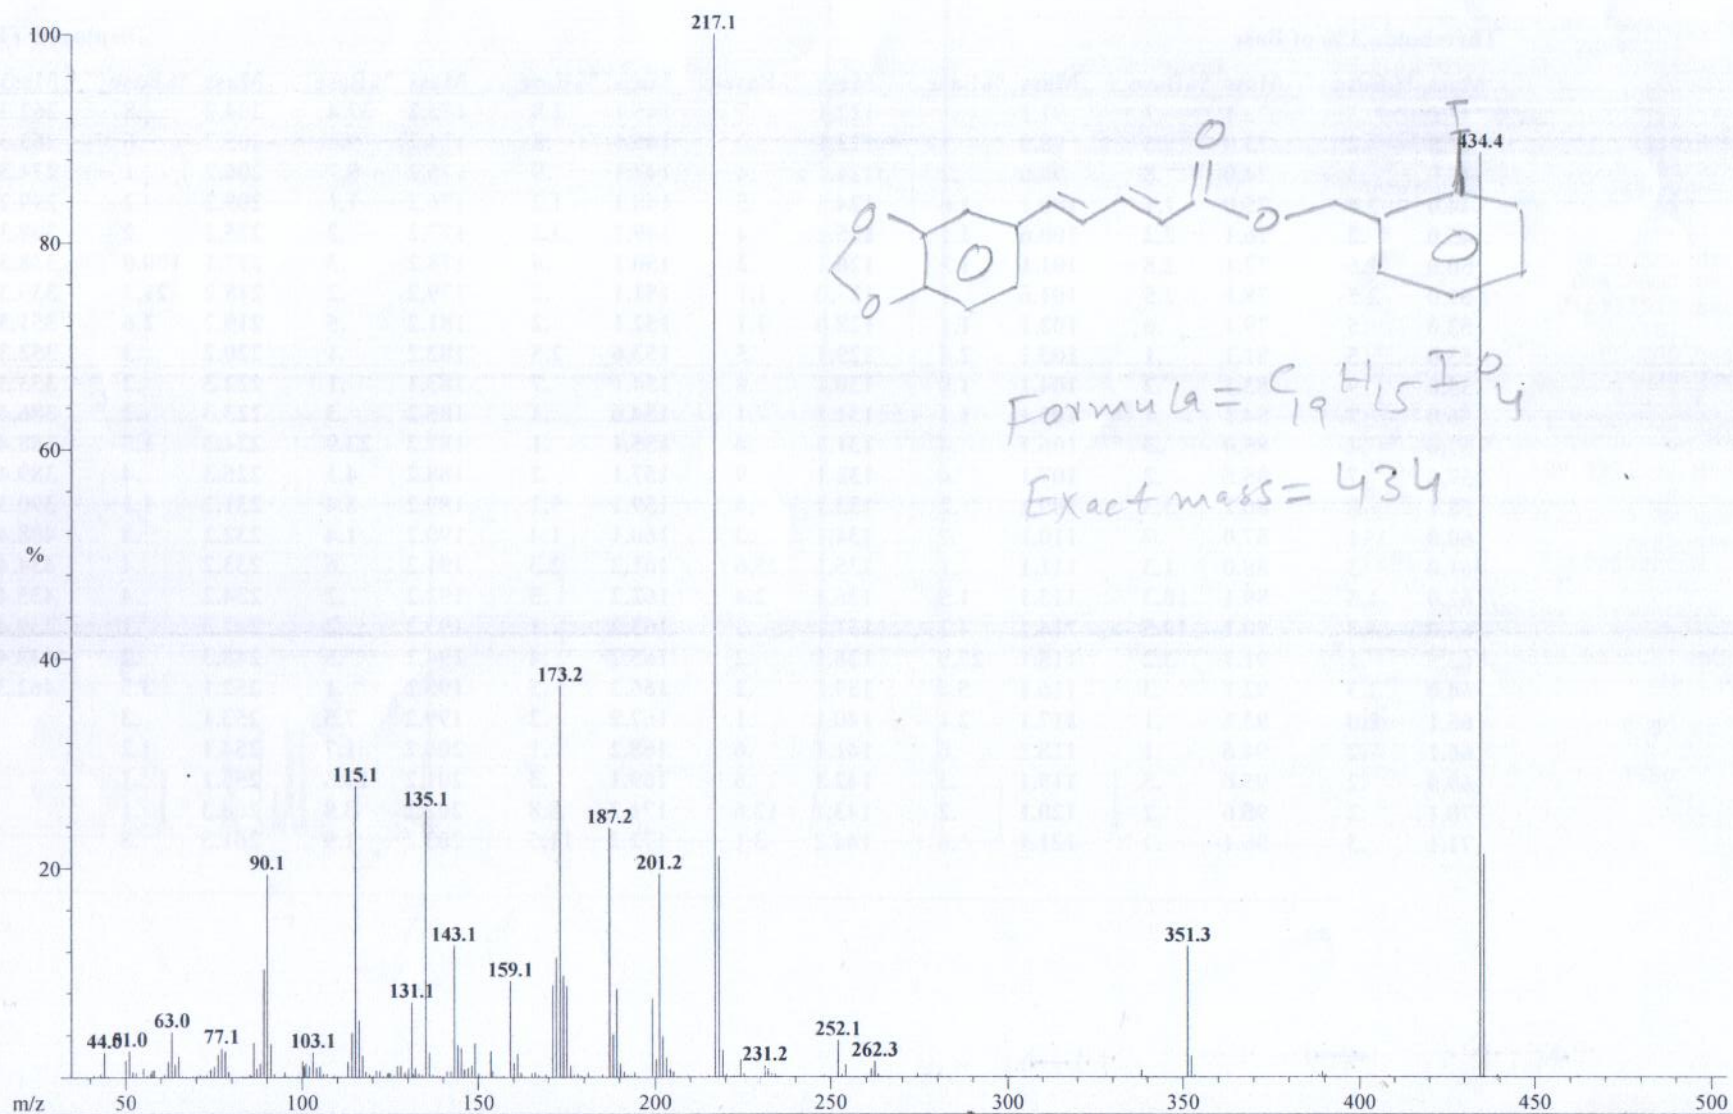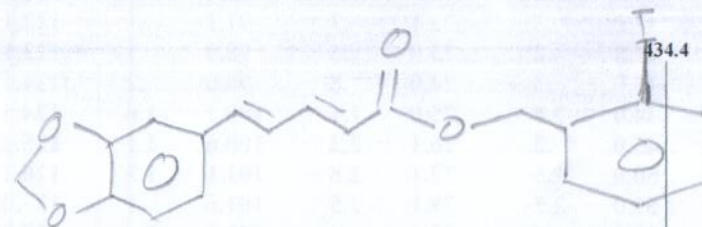

Formula =  $C_{19}H_{15}I_4$   
Exact mass = 434

**Compound 25**

File: ASF-II-89a  
Sample: ASIF /PROF. DR. FARZANA  
Instrument: JEOL JMS 600H-1  
Inlet: Direct Probe

Date Run: 07-26-2024 (Time Run: 14:56:32)

Run By: MASS LAB 104

Ionization mode: EI+

Scan: 20  
Base: m/z 201; 40.6%FS TIC: 2925992

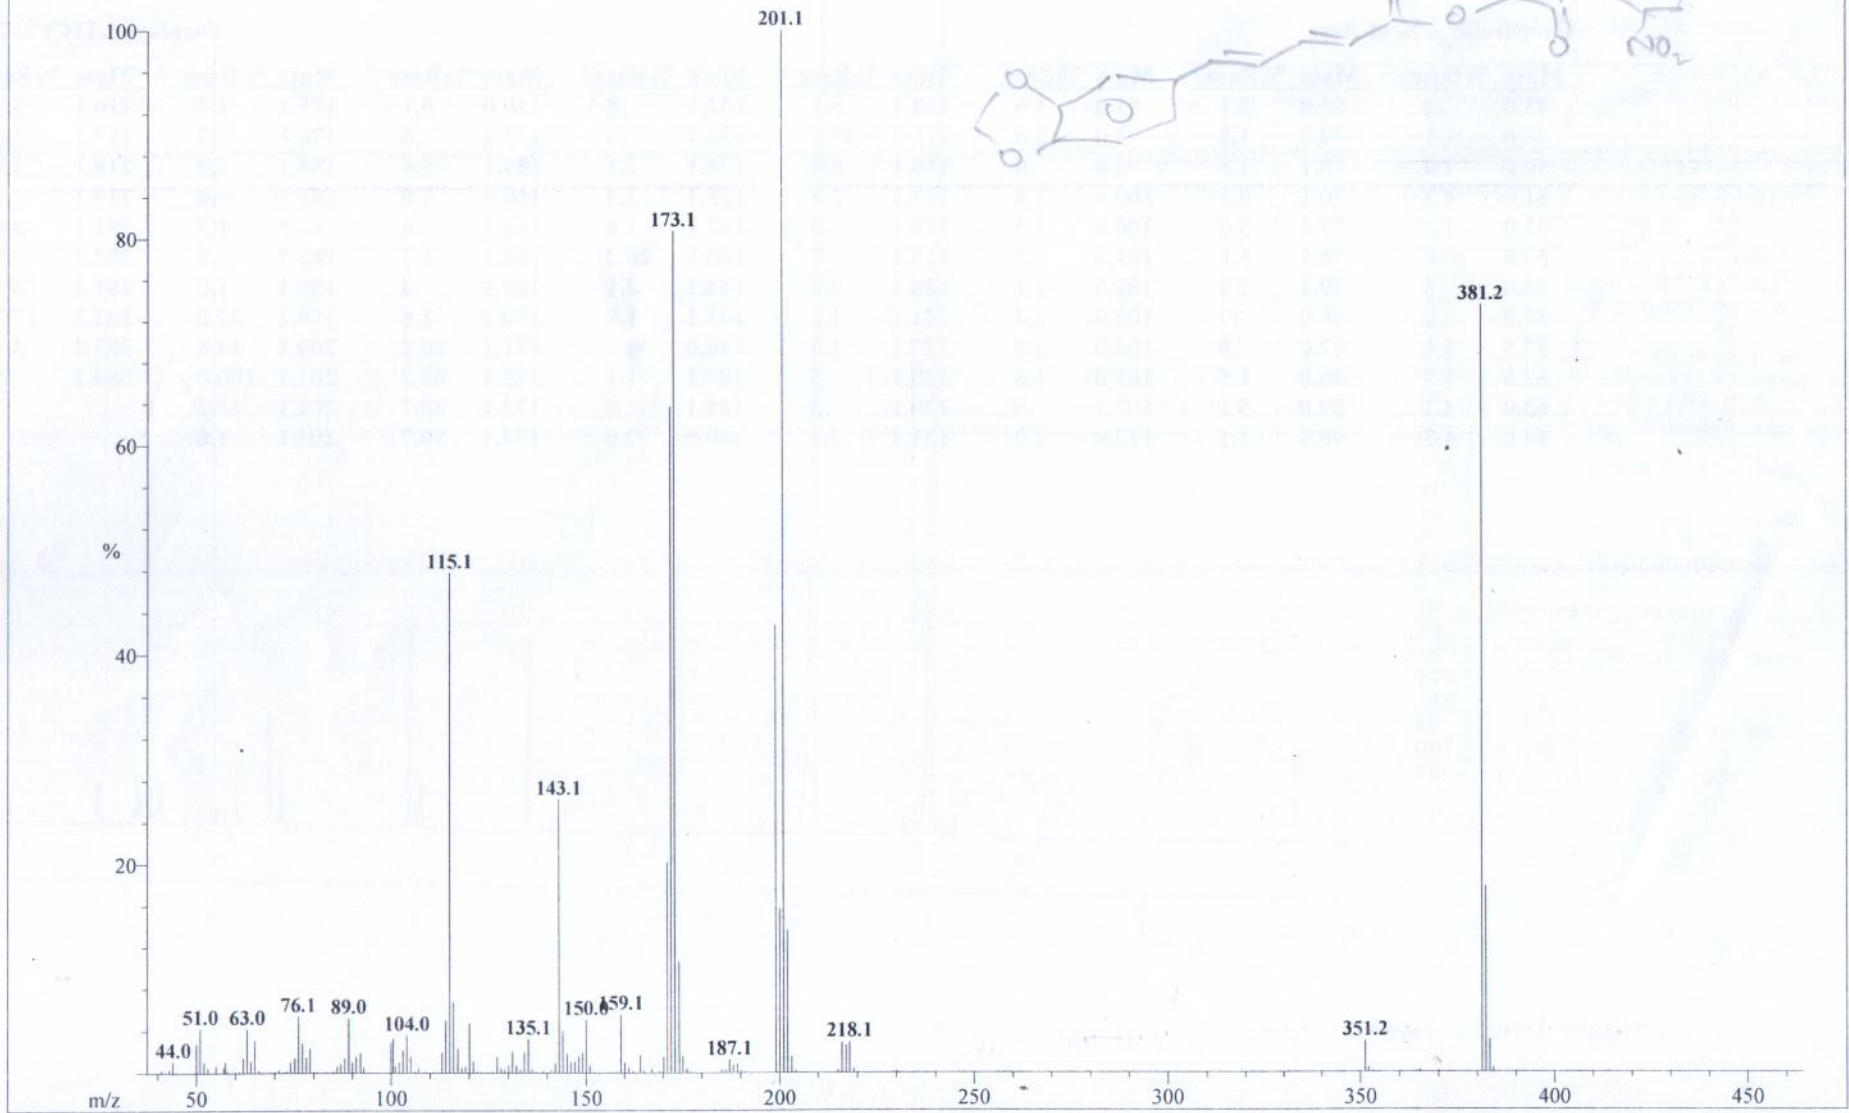

Supplement: d6ra00843g2.pdf [file d6ra00843g2.pdf]
