# Supplementary material for: Multitarget synthetic piperates against key drug targets of Alzheimer's and diabetes mellitus
Source: Royal Society of Chemistry journal article supplement (doi:10.1039/d6ra00843g), 2026-03-30
Supplement: d6ra00843g4.pdf [file d6ra00843g4.pdf]

Compound #2

File : C:\Xcalibur\data\asf-i-7a-180124-c11.RAW  
 Full ms [ 49.500 - 550.500 ] - Range: 63.000 - 220.000  
 Scan No. 1 of 1

| Mass     | Relative Intensity | Theoretical Mass | Delta [ppm] | Delta [mmu] | RDB | Composition                                    |
|----------|--------------------|------------------|-------------|-------------|-----|------------------------------------------------|
| 63.0251  | 2.1                | 63.0235          | 26.1        | 1.6         | 4.5 | C <sub>5</sub> H <sub>3</sub>                  |
| 64.0323  | 0.4                | 64.0313          | 15.4        | 1.0         | 4.0 | C <sub>5</sub> H <sub>4</sub>                  |
| 65.0407  | 1.1                | 65.0391          | 24.8        | 1.6         | 3.5 | C <sub>5</sub> H <sub>5</sub>                  |
| 67.0540  | 0.4                | 67.0548          | -10.9       | -0.7        | 2.5 | C <sub>5</sub> H <sub>7</sub>                  |
| 69.0694  | 0.5                | 69.0704          | -15.4       | -1.1        | 1.5 | C <sub>5</sub> H <sub>9</sub>                  |
| 71.0852  | 0.3                | 71.0861          | -11.9       | -0.8        | 0.5 | C <sub>5</sub> H <sub>11</sub>                 |
| 74.0153  | 0.5                | 74.0157          | -4.5        | -0.3        | 6.0 | C <sub>6</sub> H <sub>2</sub>                  |
| 75.0231  | 0.6                | 75.0235          | -4.5        | -0.3        | 5.5 | C <sub>6</sub> H <sub>3</sub>                  |
| 76.0280  | 0.4                | 76.0313          | -43.3       | -3.3        | 5.0 | C <sub>6</sub> H <sub>4</sub>                  |
| 77.0390  | 1.3                | 77.0391          | -1.4        | -0.1        | 4.5 | C <sub>6</sub> H <sub>5</sub>                  |
| 78.0481  | 0.5                | 78.0470          | 14.7        | 1.1         | 4.0 | C <sub>6</sub> H <sub>6</sub>                  |
| 79.0567  | 0.3                | 79.0548          | 24.4        | 1.9         | 3.5 | C <sub>6</sub> H <sub>7</sub>                  |
| 81.0726  | 0.3                | 81.0704          | 26.7        | 2.2         | 2.5 | C <sub>6</sub> H <sub>9</sub>                  |
| 83.0850  | 0.3                | 83.0861          | -12.7       | -1.1        | 1.5 | C <sub>6</sub> H <sub>11</sub>                 |
| 86.0244  | 0.5                |                  |             |             |     |                                                |
| 87.0230  | 0.5                | 87.0235          | -5.4        | -0.5        | 6.5 | C <sub>7</sub> H <sub>3</sub>                  |
| 88.0331  | 0.8                | 88.0313          | 20.9        | 1.8         | 6.0 | C <sub>7</sub> H <sub>4</sub>                  |
| 89.0403  | 1.9                | 89.0391          | 12.7        | 1.1         | 5.5 | C <sub>7</sub> H <sub>5</sub>                  |
| 91.0551  | 0.8                | 91.0548          | 3.1         | 0.3         | 4.5 | C <sub>7</sub> H <sub>7</sub>                  |
| 102.0490 | 0.5                | 102.0470         | 20.1        | 2.0         | 6.0 | C <sub>8</sub> H <sub>6</sub>                  |
| 103.0542 | 0.9                | 103.0548         | -5.2        | -0.5        | 5.5 | C <sub>8</sub> H <sub>7</sub>                  |
| 113.0362 | 0.7                | 113.0391         | -25.5       | -2.9        | 7.5 | C <sub>9</sub> H <sub>5</sub>                  |
| 114.0434 | 1.7                | 114.0470         | -31.2       | -3.6        | 7.0 | C <sub>9</sub> H <sub>6</sub>                  |
| 115.0516 | 10.0               | 115.0548         | -28.0       | -3.2        | 6.5 | C <sub>9</sub> H <sub>7</sub>                  |
| 116.0570 | 2.6                | 116.0626         | -48.5       | -5.6        | 6.0 | C <sub>9</sub> H <sub>8</sub>                  |
| 117.0665 | 0.7                | 117.0704         | -33.3       | -3.9        | 5.5 | C <sub>9</sub> H <sub>9</sub>                  |
| 121.0268 | 0.5                | 121.0290         | -17.8       | -2.1        | 5.5 | C <sub>7</sub> H <sub>5</sub> O <sub>2</sub>   |
| 127.0571 | 0.4                | 127.0548         | 17.9        | 2.3         | 7.5 | C <sub>10</sub> H <sub>7</sub>                 |
| 131.0550 | 0.9                | 131.0497         | 40.3        | 5.3         | 6.5 | C <sub>9</sub> H <sub>7</sub> O <sub>1</sub>   |
| 135.0450 | 0.3                | 135.0446         | 2.9         | 0.4         | 5.5 | C <sub>8</sub> H <sub>7</sub> O <sub>2</sub>   |
| 143.0498 | 4.2                | 143.0497         | 0.9         | 0.1         | 7.5 | C <sub>10</sub> H <sub>7</sub> O <sub>1</sub>  |
| 144.0569 | 1.1                | 144.0575         | -4.4        | -0.6        | 7.0 | C <sub>10</sub> H <sub>8</sub> O <sub>1</sub>  |
| 145.0682 | 0.4                | 145.0653         | 19.5        | 2.8         | 6.5 | C <sub>10</sub> H <sub>9</sub> O <sub>1</sub>  |
| 146.0400 | 0.4                | 146.0368         | 22.3        | 3.3         | 7.0 | C <sub>9</sub> H <sub>6</sub> O <sub>2</sub>   |
| 147.0529 | 0.4                |                  |             |             |     |                                                |
| 148.0577 | 0.4                | 148.0524         | 35.3        | 5.2         | 6.0 | C <sub>9</sub> H <sub>8</sub> O <sub>2</sub>   |
| 149.0292 | 0.4                | 149.0239         | 36.0        | 5.4         | 6.5 | C <sub>8</sub> H <sub>5</sub> O <sub>3</sub>   |
| 159.0522 | 0.4                | 159.0446         | 47.5        | 7.6         | 7.5 | C <sub>10</sub> H <sub>7</sub> O <sub>2</sub>  |
| 160.0536 | 0.3                | 160.0524         | 7.4         | 1.2         | 7.0 | C <sub>10</sub> H <sub>8</sub> O <sub>2</sub>  |
| 171.0405 | 1.6                | 171.0446         | -23.8       | -4.1        | 8.5 | C <sub>11</sub> H <sub>7</sub> O <sub>2</sub>  |
| 172.0537 | 2.6                | 172.0524         | 7.2         | 1.2         | 8.0 | C <sub>11</sub> H <sub>8</sub> O <sub>2</sub>  |
| 173.0547 | 8.9                | 173.0603         | -31.8       | -5.5        | 7.5 | C <sub>11</sub> H <sub>9</sub> O <sub>2</sub>  |
| 174.0657 | 1.6                | 174.0681         | -13.8       | -2.4        | 7.0 | C <sub>11</sub> H <sub>10</sub> O <sub>2</sub> |
| 200.0521 | 0.3                | 200.0473         | 24.0        | 4.8         | 9.0 | C <sub>12</sub> H <sub>8</sub> O <sub>3</sub>  |
| 202.0629 | 0.3                | 202.0630         | -0.4        | -0.1        | 8.0 | C <sub>12</sub> H <sub>10</sub> O <sub>3</sub> |
| 218.0587 | 4.5                | 218.0579         | 3.5         | 0.8         | 8.0 | C <sub>12</sub> H <sub>10</sub> O <sub>4</sub> |
| 219.0641 | 0.6                | 219.0657         | -7.6        | -1.7        | 7.5 | C <sub>12</sub> H <sub>11</sub> O <sub>4</sub> |

# Compound #3

| Mass     | Relative Intensity | Theoretical Mass | Delta [ppm] | Delta [mmu] | RDB  | Composition                                                   |
|----------|--------------------|------------------|-------------|-------------|------|---------------------------------------------------------------|
| 174.0625 | 2.3                | 174.0681         | -32.3       | -5.6        | 7.0  | C <sub>11</sub> H <sub>10</sub> O <sub>2</sub>                |
|          |                    | 174.0555         | 39.9        | 7.0         | 7.5  | C <sub>10</sub> H <sub>8</sub> O <sub>2</sub> N <sub>1</sub>  |
| 175.0635 | 0.5                | 175.0633         | 1.0         | 0.2         | 7.0  | C <sub>10</sub> H <sub>9</sub> O <sub>2</sub> N <sub>1</sub>  |
|          |                    | 175.0606         | 16.3        | 2.8         | 2.5  | C <sub>7</sub> H <sub>11</sub> O <sub>5</sub>                 |
| 179.0857 | 0.5                | 179.0861         | -2.1        | -0.4        | 9.5  | C <sub>14</sub> H <sub>11</sub>                               |
|          |                    | 179.0919         | -34.9       | -6.3        | 0.5  | C <sub>7</sub> H <sub>15</sub> O <sub>5</sub>                 |
|          |                    | 179.0794         | 35.3        | 6.3         | 1.0  | C <sub>6</sub> H <sub>13</sub> O <sub>5</sub> N <sub>1</sub>  |
| 183.2138 | 0.6                | 183.2113         | 13.7        | 2.5         | 0.5  | C <sub>13</sub> H <sub>27</sub>                               |
| 187.0562 | 0.8                | 187.0548         | 7.5         | 1.4         | 12.5 | C <sub>15</sub> H <sub>7</sub>                                |
|          |                    | 187.0606         | -23.9       | -4.5        | 3.5  | C <sub>8</sub> H <sub>11</sub> O <sub>5</sub>                 |
|          |                    | 187.0633         | -38.2       | -7.1        | 8.0  | C <sub>11</sub> H <sub>9</sub> O <sub>2</sub> N <sub>1</sub>  |
| 188.0612 | 0.6                | 188.0626         | -7.7        | -1.4        | 12.0 | C <sub>15</sub> H <sub>8</sub>                                |
|          |                    | 188.0559         | 28.0        | 5.3         | 3.5  | C <sub>7</sub> H <sub>10</sub> O <sub>5</sub> N <sub>1</sub>  |
|          |                    | 188.0685         | -38.9       | -7.3        | 3.0  | C <sub>8</sub> H <sub>12</sub> O <sub>5</sub>                 |
| 189.0658 | 0.6                | 189.0637         | 11.1        | 2.1         | 3.0  | C <sub>7</sub> H <sub>11</sub> O <sub>5</sub> N <sub>1</sub>  |
|          |                    | 189.0704         | -24.3       | -4.6        | 11.5 | C <sub>15</sub> H <sub>9</sub>                                |
| 194.0975 | 0.8                | 194.0970         | 2.8         | 0.5         | 9.5  | C <sub>14</sub> H <sub>12</sub> N <sub>1</sub>                |
|          |                    | 194.0943         | 16.6        | 3.2         | 5.0  | C <sub>11</sub> H <sub>14</sub> O <sub>3</sub>                |
|          |                    | 194.1028         | -27.5       | -5.3        | 0.5  | C <sub>7</sub> H <sub>16</sub> O <sub>5</sub> N <sub>1</sub>  |
| 199.0554 | 1.2                | 199.0548         | 3.1         | 0.6         | 13.5 | C <sub>16</sub> H <sub>7</sub>                                |
|          |                    | 199.0606         | -26.4       | -5.3        | 4.5  | C <sub>9</sub> H <sub>11</sub> O <sub>5</sub>                 |
|          |                    | 199.0481         | 36.8        | 7.3         | 5.0  | C <sub>8</sub> H <sub>9</sub> O <sub>5</sub> N <sub>1</sub>   |
|          |                    | 199.0633         | -39.9       | -7.9        | 9.0  | C <sub>12</sub> H <sub>9</sub> O <sub>2</sub> N <sub>1</sub>  |
| 201.0588 | 2.8                | 201.0578         | 4.8         | 1.0         | 13.0 | C <sub>15</sub> H <sub>7</sub> N <sub>1</sub>                 |
|          |                    | 201.0552         | 18.1        | 3.6         | 8.5  | C <sub>12</sub> H <sub>9</sub> O <sub>3</sub>                 |
|          |                    | 201.0637         | -24.5       | -4.9        | 4.0  | C <sub>8</sub> H <sub>11</sub> O <sub>5</sub> N <sub>1</sub>  |
| 202.0673 | 1.0                | 202.0657         | 8.3         | 1.7         | 12.5 | C <sub>15</sub> H <sub>8</sub> N <sub>1</sub>                 |
|          |                    | 202.0715         | -20.8       | -4.2        | 3.5  | C <sub>8</sub> H <sub>12</sub> O <sub>5</sub> N <sub>1</sub>  |
|          |                    | 202.0630         | 21.5        | 4.4         | 8.0  | C <sub>12</sub> H <sub>10</sub> O <sub>3</sub>                |
| 205.0864 | 0.6                | 205.0865         | -0.2        | -0.0        | 6.5  | C <sub>12</sub> H <sub>13</sub> O <sub>3</sub>                |
|          |                    | 205.0891         | -13.2       | -2.7        | 11.0 | C <sub>15</sub> H <sub>11</sub> N <sub>1</sub>                |
| 207.0405 | 1.8                | 207.0446         | -19.9       | -4.1        | 11.5 | C <sub>14</sub> H <sub>7</sub> O <sub>2</sub>                 |
| 240.9788 | 0.5                |                  |             |             |      |                                                               |
| 257.0699 | 5.6                | 257.0688         | 4.2         | 1.1         | 10.0 | C <sub>14</sub> H <sub>11</sub> O <sub>4</sub> N <sub>1</sub> |
|          |                    | 257.0603         | 37.5        | 9.6         | 14.5 | C <sub>18</sub> H <sub>9</sub> O <sub>2</sub>                 |
| 258.0693 | 1.1                | 258.0681         | 4.8         | 1.2         | 14.0 | C <sub>18</sub> H <sub>10</sub> O <sub>2</sub>                |
|          |                    | 258.0766         | -28.4       | -7.3        | 9.5  | C <sub>14</sub> H <sub>12</sub> O <sub>4</sub> N <sub>1</sub> |

Compound # 4

| Mass     | Relative Intensity | Theoretical Mass | Delta [ppm] | Delta [mmu] | RDB  | Composition                                    |
|----------|--------------------|------------------|-------------|-------------|------|------------------------------------------------|
| 178.0118 | 1.2                | 178.0055         | 35.7        | 6.3         | 12.0 | C <sub>12</sub> H <sub>2</sub> O <sub>2</sub>  |
|          |                    | 178.0266         | -83.0       | -14.8       | 7.0  | C <sub>9</sub> H <sub>6</sub> O <sub>4</sub>   |
| 181.9232 | 1.1                |                  |             |             |      |                                                |
| 185.0015 | 1.1                | 185.0027         | -6.5        | -1.2        | 14.5 | C <sub>14</sub> H <sub>1</sub> O <sub>1</sub>  |
|          |                    | 185.0086         | -38.2       | -7.1        | 5.5  | C <sub>7</sub> H <sub>5</sub> O <sub>6</sub>   |
|          |                    | 184.9875         | 76.0        | 14.1        | 10.5 | C <sub>10</sub> H <sub>1</sub> O <sub>4</sub>  |
| 185.9455 | 2.4                |                  |             |             |      |                                                |
| 188.0230 | 9.1                | 188.0262         | -17.3       | -3.2        | 13.0 | C <sub>14</sub> H <sub>4</sub> O <sub>1</sub>  |
|          |                    | 188.0321         | -48.5       | -9.1        | 4.0  | C <sub>7</sub> H <sub>8</sub> O <sub>6</sub>   |
|          |                    | 188.0110         | 63.9        | 12.0        | 9.0  | C <sub>10</sub> H <sub>4</sub> O <sub>4</sub>  |
| 189.0394 | 2.3                | 189.0399         | -2.6        | -0.5        | 3.5  | C <sub>7</sub> H <sub>9</sub> O <sub>6</sub>   |
|          |                    | 189.0340         | 28.5        | 5.4         | 12.5 | C <sub>14</sub> H <sub>5</sub> O <sub>1</sub>  |
|          |                    | 189.0552         | -83.3       | -15.7       | 7.5  | C <sub>11</sub> H <sub>9</sub> O <sub>3</sub>  |
| 190.0441 | 1.4                | 190.0419         | 11.6        | 2.2         | 12.0 | C <sub>14</sub> H <sub>6</sub> O <sub>1</sub>  |
|          |                    | 190.0477         | -19.4       | -3.7        | 3.0  | C <sub>7</sub> H <sub>10</sub> O <sub>6</sub>  |
|          |                    | 190.0266         | 91.8        | 17.5        | 8.0  | C <sub>10</sub> H <sub>6</sub> O <sub>4</sub>  |
| 192.0356 | 1.3                | 192.0423         | -34.7       | -6.7        | 7.0  | C <sub>10</sub> H <sub>8</sub> O <sub>4</sub>  |
|          |                    | 192.0211         | 75.3        | 14.5        | 12.0 | C <sub>13</sub> H <sub>4</sub> O <sub>2</sub>  |
| 199.0532 | 2.1                | 199.0548         | -7.8        | -1.6        | 13.5 | C <sub>16</sub> H <sub>7</sub>                 |
|          |                    | 199.0606         | -37.3       | -7.4        | 4.5  | C <sub>9</sub> H <sub>11</sub> O <sub>5</sub>  |
|          |                    | 199.0395         | 68.8        | 13.7        | 9.5  | C <sub>12</sub> H <sub>7</sub> O <sub>3</sub>  |
| 200.0608 | 1.4                | 200.0626         | -9.2        | -1.8        | 13.0 | C <sub>16</sub> H <sub>8</sub>                 |
|          |                    | 200.0685         | -38.6       | -7.7        | 4.0  | C <sub>9</sub> H <sub>12</sub> O <sub>5</sub>  |
|          |                    | 200.0473         | 67.1        | 13.4        | 9.0  | C <sub>12</sub> H <sub>8</sub> O <sub>3</sub>  |
| 201.0594 | 10.7               | 201.0552         | 21.2        | 4.3         | 8.5  | C <sub>12</sub> H <sub>9</sub> O <sub>3</sub>  |
|          |                    | 201.0704         | -54.7       | -11.0       | 12.5 | C <sub>16</sub> H <sub>9</sub>                 |
|          |                    | 201.0763         | -83.9       | -16.9       | 3.5  | C <sub>9</sub> H <sub>13</sub> O <sub>5</sub>  |
| 202.0657 | 3.3                | 202.0630         | 13.6        | 2.8         | 8.0  | C <sub>12</sub> H <sub>10</sub> O <sub>3</sub> |
|          |                    | 202.0783         | -61.9       | -12.5       | 12.0 | C <sub>16</sub> H <sub>10</sub>                |
|          |                    | 202.0477         | 89.1        | 18.0        | 4.0  | C <sub>8</sub> H <sub>10</sub> O <sub>6</sub>  |
| 207.0182 | 1.3                | 207.0235         | -25.5       | -5.3        | 16.5 | C <sub>17</sub> H <sub>3</sub>                 |
|          |                    | 207.0082         | 48.2        | 10.0        | 12.5 | C <sub>13</sub> H <sub>3</sub> O <sub>3</sub>  |
|          |                    | 207.0293         | -53.9       | -11.2       | 7.5  | C <sub>10</sub> H <sub>7</sub> O <sub>5</sub>  |
| 211.9446 | 1.6                |                  |             |             |      |                                                |
| 212.9698 | 1.2                | 212.9824         | -59.4       | -12.6       | 11.5 | C <sub>11</sub> H <sub>1</sub> O <sub>5</sub>  |
| 216.9739 | 3.6                | 216.9773         | -15.5       | -3.4        | 10.5 | C <sub>10</sub> H <sub>1</sub> O <sub>6</sub>  |
|          |                    | 216.9926         | -85.8       | -18.6       | 14.5 | C <sub>14</sub> H <sub>1</sub> O <sub>3</sub>  |
| 218.9018 | 10.0               |                  |             |             |      |                                                |
| 223.8808 | 1.1                |                  |             |             |      |                                                |
| 230.8755 | 12.9               |                  |             |             |      |                                                |
| 235.9193 | 1.2                |                  |             |             |      |                                                |
| 288.1358 | 9.5                | 288.1362         | -1.1        | -0.3        | 8.0  | C <sub>17</sub> H <sub>20</sub> O <sub>4</sub> |
|          |                    | 288.1514         | -54.1       | -15.6       | 12.0 | C <sub>21</sub> H <sub>20</sub> O <sub>1</sub> |
|          |                    | 288.1150         | 72.2        | 20.8        | 13.0 | C <sub>20</sub> H <sub>16</sub> O <sub>2</sub> |
| 289.1352 | 1.2                | 289.1440         | -30.3       | -8.8        | 7.5  | C <sub>17</sub> H <sub>21</sub> O <sub>4</sub> |
|          |                    | 289.1229         | 42.8        | 12.4        | 12.5 | C <sub>20</sub> H <sub>17</sub> O <sub>2</sub> |
|          |                    | 289.1592         | -83.1       | -24.0       | 11.5 | C <sub>21</sub> H <sub>21</sub> O <sub>1</sub> |

Compound # 5

| Mass     | Relative Intensity | Theoretical Mass | Delta [ppm] | Delta [mmu] | RDB  | Composition                                    |
|----------|--------------------|------------------|-------------|-------------|------|------------------------------------------------|
|          |                    | 218.0732         | -64.7       | -14.1       | 12.0 | C <sub>16</sub> H <sub>10</sub> O <sub>1</sub> |
|          |                    | 218.0790         | -91.6       | -20.0       | 3.0  | C <sub>9</sub> H <sub>14</sub> O <sub>6</sub>  |
| 219.0637 | 1.6                | 219.0657         | -9.1        | -2.0        | 7.5  | C <sub>12</sub> H <sub>11</sub> O <sub>4</sub> |
|          |                    | 219.0810         | -78.7       | -17.2       | 11.5 | C <sub>16</sub> H <sub>11</sub> O <sub>1</sub> |
|          |                    | 219.0446         | 87.4        | 19.1        | 12.5 | C <sub>15</sub> H <sub>7</sub> O <sub>2</sub>  |
| 224.0199 | 1.2                | 224.0262         | -28.3       | -6.3        | 16.0 | C <sub>17</sub> H <sub>4</sub> O <sub>1</sub>  |
|          |                    | 224.0110         | 39.8        | 8.9         | 12.0 | C <sub>13</sub> H <sub>4</sub> O <sub>4</sub>  |
|          |                    | 224.0321         | -54.6       | -12.2       | 7.0  | C <sub>10</sub> H <sub>8</sub> O <sub>6</sub>  |
| 225.0181 | 1.6                | 225.0188         | -2.8        | -0.6        | 11.5 | C <sub>13</sub> H <sub>5</sub> O <sub>4</sub>  |
|          |                    | 225.0340         | -70.6       | -15.9       | 15.5 | C <sub>17</sub> H <sub>5</sub> O <sub>1</sub>  |
|          |                    | 224.9977         | 91.1        | 20.5        | 16.5 | C <sub>16</sub> H <sub>1</sub> O <sub>2</sub>  |
| 226.0192 | 1.5                | 226.0266         | -32.9       | -7.4        | 11.0 | C <sub>13</sub> H <sub>6</sub> O <sub>4</sub>  |
|          |                    | 226.0055         | 60.5        | 13.7        | 16.0 | C <sub>16</sub> H <sub>2</sub> O <sub>2</sub>  |
| 230.8972 | 3.8                |                  |             |             |      |                                                |
| 242.0517 | 1.2                | 242.0579         | -25.6       | -6.2        | 10.0 | C <sub>14</sub> H <sub>10</sub> O <sub>4</sub> |
|          |                    | 242.0368         | 61.7        | 14.9        | 15.0 | C <sub>17</sub> H <sub>6</sub> O <sub>2</sub>  |
|          |                    | 242.0732         | -88.6       | -21.5       | 14.0 | C <sub>18</sub> H <sub>10</sub> O <sub>1</sub> |
| 268.0740 | 1.4                | 268.0736         | 1.6         | 0.4         | 11.0 | C <sub>16</sub> H <sub>12</sub> O <sub>4</sub> |
|          |                    | 268.0888         | -55.3       | -14.8       | 15.0 | C <sub>20</sub> H <sub>12</sub> O <sub>1</sub> |
|          |                    | 268.0947         | -77.2       | -20.7       | 6.0  | C <sub>13</sub> H <sub>16</sub> O <sub>6</sub> |
| 271.1041 | 1.1                | 271.0970         | 26.0        | 7.1         | 9.5  | C <sub>16</sub> H <sub>15</sub> O <sub>4</sub> |
|          |                    | 271.1123         | -30.2       | -8.2        | 13.5 | C <sub>20</sub> H <sub>15</sub> O <sub>1</sub> |
|          |                    | 271.1182         | -51.9       | -14.1       | 4.5  | C <sub>13</sub> H <sub>19</sub> O <sub>6</sub> |
| 272.1042 | 21.9               | 272.1049         | -2.4        | -0.7        | 9.0  | C <sub>16</sub> H <sub>16</sub> O <sub>4</sub> |
|          |                    | 272.1201         | -58.5       | -15.9       | 13.0 | C <sub>20</sub> H <sub>16</sub> O <sub>1</sub> |
|          |                    | 272.0837         | 75.2        | 20.5        | 14.0 | C <sub>19</sub> H <sub>12</sub> O <sub>2</sub> |
| 273.1080 | 4.0                | 273.1127         | -17.0       | -4.6        | 8.5  | C <sub>16</sub> H <sub>17</sub> O <sub>4</sub> |
|          |                    | 273.0916         | 60.4        | 16.5        | 13.5 | C <sub>19</sub> H <sub>13</sub> O <sub>2</sub> |
|          |                    | 273.1279         | -72.8       | -19.9       | 12.5 | C <sub>20</sub> H <sub>17</sub> O <sub>1</sub> |

# Compound # 6

File : C:\Xcalibur\data\asf-i-103a-180324-c2.RAW  
 Full ms [ 49.500 - 600.500 ] - Range: 63.000 - 600.500  
 Scan No. 1 of 1

| Mass     | Relative Intensity | Theoretical Mass | Delta [ppm] | Delta [mmu] | RDB  | Composition                                                    |
|----------|--------------------|------------------|-------------|-------------|------|----------------------------------------------------------------|
| 63.0245  | 1.4                | 63.0235          | 16.5        | 1.0         | 4.5  | C <sub>5</sub> H <sub>3</sub>                                  |
| 64.0335  | 0.3                | 64.0313          | 33.7        | 2.2         | 4.0  | C <sub>5</sub> H <sub>4</sub>                                  |
| 65.0386  | 0.8                | 65.0391          | -8.2        | -0.5        | 3.5  | C <sub>5</sub> H <sub>5</sub>                                  |
| 69.0683  | 0.5                | 69.0704          | -30.8       | -2.1        | 1.5  | C <sub>5</sub> H <sub>9</sub>                                  |
| 71.0845  | 0.5                | 71.0861          | -21.6       | -1.5        | 0.5  | C <sub>5</sub> H <sub>11</sub>                                 |
| 73.0074  | 0.5                | 73.0078          | -6.1        | -0.4        | 6.5  | C <sub>6</sub> H <sub>1</sub>                                  |
| 73.0457  | 0.4                |                  |             |             |      |                                                                |
| 74.0134  | 1.7                | 74.0157          | -30.5       | -2.3        | 6.0  | C <sub>6</sub> H <sub>2</sub>                                  |
| 75.0240  | 2.0                | 75.0235          | 7.0         | 0.5         | 5.5  | C <sub>6</sub> H <sub>3</sub>                                  |
| 76.0283  | 1.6                | 76.0313          | -39.4       | -3.0        | 5.0  | C <sub>6</sub> H <sub>4</sub>                                  |
| 77.0369  | 2.6                | 77.0391          | -28.7       | -2.2        | 4.5  | C <sub>6</sub> H <sub>5</sub>                                  |
| 78.0450  | 0.8                | 78.0470          | -25.5       | -2.0        | 4.0  | C <sub>6</sub> H <sub>6</sub>                                  |
| 79.0548  | 0.9                | 79.0548          | 0.5         | 0.0         | 3.5  | C <sub>6</sub> H <sub>7</sub>                                  |
| 83.0857  | 0.3                | 83.0861          | -4.5        | -0.4        | 1.5  | C <sub>6</sub> H <sub>11</sub>                                 |
| 85.1036  | 0.4                | 85.1017          | 21.7        | 1.8         | 0.5  | C <sub>6</sub> H <sub>13</sub>                                 |
| 88.0318  | 0.4                | 88.0313          | 6.1         | 0.5         | 6.0  | C <sub>7</sub> H <sub>4</sub>                                  |
| 89.0409  | 2.4                | 89.0391          | 20.4        | 1.8         | 5.5  | C <sub>7</sub> H <sub>5</sub>                                  |
| 90.0466  | 2.3                | 90.0470          | -4.4        | -0.4        | 5.0  | C <sub>7</sub> H <sub>6</sub>                                  |
| 91.0542  | 1.6                | 91.0548          | -6.6        | -0.6        | 4.5  | C <sub>7</sub> H <sub>7</sub>                                  |
| 102.0430 | 0.6                | 102.0470         | -38.7       | -3.9        | 6.0  | C <sub>8</sub> H <sub>6</sub>                                  |
| 103.0532 | 0.6                | 103.0548         | -15.5       | -1.6        | 5.5  | C <sub>8</sub> H <sub>7</sub>                                  |
| 107.0501 | 0.4                | 107.0497         | 3.9         | 0.4         | 4.5  | C <sub>7</sub> H <sub>7</sub> O <sub>1</sub>                   |
| 114.0451 | 0.6                | 114.0470         | -16.2       | -1.8        | 7.0  | C <sub>9</sub> H <sub>6</sub>                                  |
| 115.0526 | 3.5                | 115.0548         | -18.6       | -2.1        | 6.5  | C <sub>9</sub> H <sub>7</sub>                                  |
| 116.0571 | 0.7                |                  |             |             |      |                                                                |
| 131.0519 | 1.0                | 131.0497         | 16.7        | 2.2         | 6.5  | C <sub>9</sub> H <sub>7</sub> O <sub>1</sub>                   |
| 135.0445 | 1.9                | 135.0446         | -0.7        | -0.1        | 5.5  | C <sub>8</sub> H <sub>7</sub> O <sub>2</sub>                   |
| 143.0507 | 1.0                | 143.0497         | 7.0         | 1.0         | 7.5  | C <sub>10</sub> H <sub>7</sub> O <sub>1</sub>                  |
| 144.0566 | 0.3                | 144.0575         | -6.4        | -0.9        | 7.0  | C <sub>10</sub> H <sub>8</sub> O <sub>1</sub>                  |
| 149.0294 | 0.4                | 149.0239         | 37.2        | 5.5         | 6.5  | C <sub>8</sub> H <sub>5</sub> O <sub>3</sub>                   |
| 154.9481 | 1.5                | 154.9496         | -9.9        | -1.5        | 4.5  | C <sub>6</sub> H <sub>4</sub> Br <sub>1</sub>                  |
| 156.9476 | 1.6                |                  |             |             |      |                                                                |
| 159.0455 | 0.9                | 159.0446         | 5.7         | 0.9         | 7.5  | C <sub>10</sub> H <sub>7</sub> O <sub>2</sub>                  |
| 169.9809 | 1.0                |                  |             |             |      |                                                                |
| 171.0438 | 0.7                | 171.0446         | -4.7        | -0.8        | 8.5  | C <sub>11</sub> H <sub>7</sub> O <sub>2</sub>                  |
| 171.9719 | 0.6                |                  |             |             |      |                                                                |
| 172.0558 | 0.7                | 172.0524         | 19.3        | 3.3         | 8.0  | C <sub>11</sub> H <sub>8</sub> O <sub>2</sub>                  |
| 173.0598 | 2.0                | 173.0603         | -2.7        | -0.5        | 7.5  | C <sub>11</sub> H <sub>9</sub> O <sub>2</sub>                  |
| 174.0670 | 0.4                | 174.0681         | -5.9        | -1.0        | 7.0  | C <sub>11</sub> H <sub>10</sub> O <sub>2</sub>                 |
| 175.0410 | 0.5                | 175.0395         | 8.3         | 1.5         | 7.5  | C <sub>10</sub> H <sub>7</sub> O <sub>3</sub>                  |
| 182.9489 | 2.8                | 182.9446         | 23.9        | 4.4         | 5.5  | C <sub>7</sub> H <sub>4</sub> O <sub>1</sub> Br <sub>1</sub>   |
| 183.9523 | 2.0                | 183.9524         | -0.2        | -0.0        | 5.0  | C <sub>7</sub> H <sub>5</sub> O <sub>1</sub> Br <sub>1</sub>   |
| 184.9471 | 3.1                | 184.9449         | 11.8        | 2.2         | 0.5  | C <sub>3</sub> H <sub>6</sub> O <sub>4</sub> Br <sub>1</sub>   |
| 185.9564 | 2.1                | 185.9528         | 19.5        | 3.6         | 0.0  | C <sub>3</sub> H <sub>7</sub> O <sub>4</sub> Br <sub>1</sub>   |
| 187.0435 | 1.9                | 187.0395         | 21.4        | 4.0         | 8.5  | C <sub>11</sub> H <sub>7</sub> O <sub>3</sub>                  |
| 188.0485 | 0.3                | 188.0473         | 5.9         | 1.1         | 8.0  | C <sub>11</sub> H <sub>8</sub> O <sub>3</sub>                  |
| 189.0579 | 0.8                | 189.0552         | 14.3        | 2.7         | 7.5  | C <sub>11</sub> H <sub>9</sub> O <sub>3</sub>                  |
| 199.0474 | 0.5                | 199.0548         | -37.2       | -7.4        | 13.5 | C <sub>16</sub> H <sub>7</sub>                                 |
|          |                    | 199.0395         | 39.4        | 7.9         | 9.5  | C <sub>12</sub> H <sub>7</sub> O <sub>3</sub>                  |
| 201.0563 | 0.5                | 201.0552         | 5.7         | 1.1         | 8.5  | C <sub>12</sub> H <sub>9</sub> O <sub>3</sub>                  |
| 207.0383 | 0.4                | 207.0385         | -1.0        | -0.2        | 0.5  | C <sub>8</sub> H <sub>16</sub> O <sub>1</sub> Br <sub>1</sub>  |
|          |                    | 207.0446         | -30.7       | -6.3        | 11.5 | C <sub>14</sub> H <sub>7</sub> O <sub>2</sub>                  |
| 217.0460 | 6.2                | 217.0501         | -18.7       | -4.1        | 8.5  | C <sub>12</sub> H <sub>9</sub> O <sub>4</sub>                  |
| 218.0490 | 1.0                |                  |             |             |      |                                                                |
| 328.9926 | 0.4                | 328.9966         | -12.3       | -4.0        | 15.5 | C <sub>20</sub> H <sub>10</sub> Br <sub>1</sub>                |
|          |                    | 328.9875         | 15.4        | 5.1         | 22.5 | C <sub>22</sub> H <sub>1</sub> O <sub>4</sub>                  |
|          |                    | 329.0027         | -31.0       | -10.2       | 26.5 | C <sub>26</sub> H <sub>1</sub> O <sub>1</sub>                  |
| 386.0147 | 1.4                | 386.0154         | -1.6        | -0.6        | 12.0 | C <sub>19</sub> H <sub>15</sub> O <sub>4</sub> Br <sub>1</sub> |
|          |                    | 386.0157         | -2.4        | -0.9        | 32.0 | C <sub>32</sub> H <sub>2</sub>                                 |
|          |                    | 386.0004         | 37.2        | 14.3        | 28.0 | C <sub>28</sub> H <sub>2</sub> O <sub>3</sub>                  |
| 387.0195 | 0.3                | 387.0232         | -9.4        | -3.6        | 11.5 | C <sub>19</sub> H <sub>16</sub> O <sub>4</sub> Br <sub>1</sub> |
|          |                    | 387.0235         | -10.1       | -3.9        | 31.5 | C <sub>32</sub> H <sub>3</sub>                                 |
|          |                    | 387.0082         | 29.3        | 11.3        | 27.5 | C <sub>28</sub> H <sub>3</sub> O <sub>3</sub>                  |
| 388.0160 | 1.4                | 388.0160         | -0.1        | -0.0        | 27.0 | C <sub>28</sub> H <sub>4</sub> O <sub>3</sub>                  |
|          |                    | 388.0099         | 15.8        | 6.1         | 16.0 | C <sub>22</sub> H <sub>13</sub> O <sub>2</sub> Br <sub>1</sub> |
|          |                    | 388.0310         | -38.7       | -15.0       | 11.0 | C <sub>19</sub> H <sub>17</sub> O <sub>4</sub> Br <sub>1</sub> |

Compound # 7

| Mass     | Relative Intensity | Theoretical Mass | Delta [ppm] | Delta [mmu] | RDB  | Composition                                                    |
|----------|--------------------|------------------|-------------|-------------|------|----------------------------------------------------------------|
|          |                    | 175.0122         | 19.7        | 3.5         | 1.5  | C <sub>7</sub> H <sub>12</sub> Br <sub>1</sub>                 |
|          |                    | 175.0031         | 71.7        | 12.6        | 8.5  | C <sub>9</sub> H <sub>3</sub> O <sub>4</sub>                   |
| 187.0407 | 3.1                | 187.0395         | 6.5         | 1.2         | 8.5  | C <sub>11</sub> H <sub>7</sub> O <sub>3</sub>                  |
|          |                    | 187.0548         | -75.1       | -14.0       | 12.5 | C <sub>15</sub> H <sub>7</sub>                                 |
| 188.0485 | 0.7                | 188.0473         | 5.9         | 1.1         | 8.0  | C <sub>11</sub> H <sub>8</sub> O <sub>3</sub>                  |
|          |                    | 188.0626         | -75.2       | -14.1       | 12.0 | C <sub>15</sub> H <sub>8</sub>                                 |
| 189.0585 | 1.6                | 189.0552         | 17.6        | 3.3         | 7.5  | C <sub>11</sub> H <sub>9</sub> O <sub>3</sub>                  |
|          |                    | 189.0704         | -63.0       | -11.9       | 11.5 | C <sub>15</sub> H <sub>9</sub>                                 |
| 199.0416 | 1.4                | 199.0395         | 10.5        | 2.1         | 9.5  | C <sub>12</sub> H <sub>7</sub> O <sub>3</sub>                  |
|          |                    | 199.0548         | -66.2       | -13.2       | 13.5 | C <sub>16</sub> H <sub>7</sub>                                 |
| 201.0569 | 1.7                | 201.0552         | 8.5         | 1.7         | 8.5  | C <sub>12</sub> H <sub>9</sub> O <sub>3</sub>                  |
|          |                    | 201.0704         | -67.4       | -13.5       | 12.5 | C <sub>16</sub> H <sub>9</sub>                                 |
| 202.0681 | 0.7                | 202.0630         | 25.3        | 5.1         | 8.0  | C <sub>12</sub> H <sub>10</sub> O <sub>3</sub>                 |
|          |                    | 202.0783         | -50.2       | -10.1       | 12.0 | C <sub>16</sub> H <sub>10</sub>                                |
| 203.0805 | 0.5                | 203.0861         | -27.7       | -5.6        | 11.5 | C <sub>16</sub> H <sub>11</sub>                                |
|          |                    | 203.0708         | 47.5        | 9.6         | 7.5  | C <sub>12</sub> H <sub>11</sub> O <sub>3</sub>                 |
| 216.9774 | 10.0               | 216.9864         | -41.5       | -9.0        | 3.5  | C <sub>8</sub> H <sub>10</sub> O <sub>2</sub> Br <sub>1</sub>  |
|          |                    | 216.9653         | 55.9        | 12.1        | 8.5  | C <sub>11</sub> H <sub>6</sub> Br <sub>1</sub>                 |
|          |                    | 216.9926         | -69.8       | -15.1       | 14.5 | C <sub>14</sub> H <sub>1</sub> O <sub>3</sub>                  |
| 217.9792 | 1.6                | 217.9731         | 27.7        | 6.0         | 8.0  | C <sub>11</sub> H <sub>7</sub> Br <sub>1</sub>                 |
|          |                    | 217.9942         | -69.2       | -15.1       | 3.0  | C <sub>8</sub> H <sub>11</sub> O <sub>2</sub> Br <sub>1</sub>  |
|          |                    | 218.0004         | -97.4       | -21.2       | 14.0 | C <sub>14</sub> H <sub>2</sub> O <sub>3</sub>                  |
|          |                    | 217.9579         | 97.7        | 21.3        | 4.0  | C <sub>7</sub> H <sub>7</sub> O <sub>3</sub> Br <sub>1</sub>   |
| 279.1575 | 6.6                | 279.1596         | -7.7        | -2.2        | 5.5  | C <sub>16</sub> H <sub>23</sub> O <sub>4</sub>                 |
|          |                    | 279.1749         | -62.4       | -17.4       | 9.5  | C <sub>20</sub> H <sub>23</sub> O <sub>1</sub>                 |
|          |                    | 279.1385         | 68.0        | 19.0        | 10.5 | C <sub>19</sub> H <sub>19</sub> O <sub>2</sub>                 |
| 280.1617 | 1.3                | 280.1675         | -20.4       | -5.7        | 5.0  | C <sub>16</sub> H <sub>24</sub> O <sub>4</sub>                 |
|          |                    | 280.1463         | 55.0        | 15.4        | 10.0 | C <sub>19</sub> H <sub>20</sub> O <sub>2</sub>                 |
|          |                    | 280.1827         | -74.9       | -21.0       | 9.0  | C <sub>20</sub> H <sub>24</sub> O <sub>1</sub>                 |
| 386.0143 | 1.9                | 386.0154         | -2.9        | -1.1        | 12.0 | C <sub>19</sub> H <sub>15</sub> O <sub>4</sub> Br <sub>1</sub> |
|          |                    | 386.0157         | -3.6        | -1.4        | 32.0 | C <sub>32</sub> H <sub>2</sub>                                 |
|          |                    | 386.0004         | 35.9        | 13.9        | 28.0 | C <sub>28</sub> H <sub>2</sub> O <sub>3</sub>                  |
|          |                    | 386.0306         | -42.4       | -16.4       | 16.0 | C <sub>23</sub> H <sub>15</sub> O <sub>1</sub> Br <sub>1</sub> |
| 388.0135 | 2.0                | 388.0160         | -6.6        | -2.5        | 27.0 | C <sub>28</sub> H <sub>4</sub> O <sub>3</sub>                  |
|          |                    | 388.0099         | 9.3         | 3.6         | 16.0 | C <sub>22</sub> H <sub>13</sub> O <sub>2</sub> Br <sub>1</sub> |
|          |                    | 388.0310         | -45.2       | -17.5       | 11.0 | C <sub>19</sub> H <sub>17</sub> O <sub>4</sub> Br <sub>1</sub> |
|          |                    | 388.0313         | -45.9       | -17.8       | 31.0 | C <sub>32</sub> H <sub>4</sub>                                 |

# Compound # 8

| Mass     | Relative Intensity | Theoretical Mass | Delta [ppm] | Delta [mmu] | RDB  | Composition                                                    |
|----------|--------------------|------------------|-------------|-------------|------|----------------------------------------------------------------|
| 226.0646 | 1.1                | 226.0630         | 6.9         | 1.6         | 10.0 | C <sub>14</sub> H <sub>10</sub> O <sub>3</sub>                 |
|          |                    | 226.0549         | 42.6        | 9.6         | 10.0 | C <sub>15</sub> H <sub>11</sub> Cl <sub>1</sub>                |
|          |                    | 226.0761         | -50.8       | -11.5       | 5.0  | C <sub>12</sub> H <sub>15</sub> O <sub>2</sub> Cl <sub>1</sub> |
| 259.0476 | 1.4                | 259.0526         | -19.4       | -5.0        | 9.5  | C <sub>15</sub> H <sub>12</sub> O <sub>2</sub> Cl <sub>1</sub> |
|          |                    | 259.0548         | -27.8       | -7.2        | 18.5 | C <sub>21</sub> H <sub>7</sub>                                 |
|          |                    | 259.0395         | 31.0        | 8.0         | 14.5 | C <sub>17</sub> H <sub>7</sub> O <sub>3</sub>                  |
| 342.0668 | 3.5                | 342.0659         | 2.6         | 0.9         | 12.0 | C <sub>19</sub> H <sub>15</sub> O <sub>4</sub> Cl <sub>1</sub> |
|          |                    | 342.0681         | -3.8        | -1.3        | 21.0 | C <sub>25</sub> H <sub>10</sub> O <sub>2</sub>                 |
|          |                    | 342.0811         | -42.0       | -14.4       | 16.0 | C <sub>23</sub> H <sub>15</sub> O <sub>1</sub> Cl <sub>1</sub> |
| 344.0710 | 2.2                | 344.0626         | 24.4        | 8.4         | 25.0 | C <sub>28</sub> H <sub>8</sub>                                 |
|          |                    | 344.0815         | -30.6       | -10.5       | 11.0 | C <sub>19</sub> H <sub>17</sub> O <sub>4</sub> Cl <sub>1</sub> |
|          |                    | 344.0604         | 30.8        | 10.6        | 16.0 | C <sub>22</sub> H <sub>13</sub> O <sub>2</sub> Cl <sub>1</sub> |

Compound # 9

| Mass     | Relative Intensity | Theoretical Mass | Delta [ppm] | Delta [mmu] | RDB  | Composition                                                    |
|----------|--------------------|------------------|-------------|-------------|------|----------------------------------------------------------------|
|          |                    | 186.0003         | 47.3        | 8.8         | 5.0  | C <sub>9</sub> H <sub>8</sub> Cl <sub>2</sub>                  |
|          |                    | 186.0214         | -66.3       | -12.3       | 0.0  | C <sub>6</sub> H <sub>12</sub> O <sub>2</sub> Cl <sub>2</sub>  |
| 187.0608 | 8.7                | 187.0548         | 32.5        | 6.1         | 12.5 | C <sub>15</sub> H <sub>7</sub>                                 |
|          |                    | 187.0526         | 44.2        | 8.3         | 3.5  | C <sub>9</sub> H <sub>12</sub> O <sub>2</sub> Cl <sub>1</sub>  |
|          |                    | 187.0759         | -80.5       | -15.1       | 7.5  | C <sub>12</sub> H <sub>11</sub> O <sub>2</sub>                 |
| 188.0688 | 1.5                | 188.0626         | 33.0        | 6.2         | 12.0 | C <sub>15</sub> H <sub>8</sub>                                 |
|          |                    | 188.0604         | 44.7        | 8.4         | 3.0  | C <sub>9</sub> H <sub>13</sub> O <sub>2</sub> Cl <sub>1</sub>  |
|          |                    | 188.0837         | -79.3       | -14.9       | 7.0  | C <sub>12</sub> H <sub>12</sub> O <sub>2</sub>                 |
| 189.0810 | 3.6                | 189.0704         | 55.8        | 10.5        | 11.5 | C <sub>15</sub> H <sub>9</sub>                                 |
|          |                    | 189.0916         | -56.0       | -10.6       | 6.5  | C <sub>12</sub> H <sub>13</sub> O <sub>2</sub>                 |
|          |                    | 189.0682         | 67.4        | 12.7        | 2.5  | C <sub>9</sub> H <sub>14</sub> O <sub>2</sub> Cl <sub>1</sub>  |
| 199.0585 | 10.7               | 199.0548         | 18.9        | 3.8         | 13.5 | C <sub>16</sub> H <sub>7</sub>                                 |
|          |                    | 199.0526         | 29.9        | 6.0         | 4.5  | C <sub>10</sub> H <sub>12</sub> O <sub>2</sub> Cl <sub>1</sub> |
|          |                    | 199.0759         | -87.2       | -17.4       | 8.5  | C <sub>13</sub> H <sub>11</sub> O <sub>2</sub>                 |
|          |                    | 199.0395         | 95.5        | 19.0        | 9.5  | C <sub>12</sub> H <sub>7</sub> O <sub>3</sub>                  |
| 200.0620 | 2.2                | 200.0626         | -3.0        | -0.6        | 13.0 | C <sub>16</sub> H <sub>8</sub>                                 |
|          |                    | 200.0604         | 7.9         | 1.6         | 4.0  | C <sub>10</sub> H <sub>13</sub> O <sub>2</sub> Cl <sub>1</sub> |
|          |                    | 200.0473         | 73.2        | 14.6        | 9.0  | C <sub>12</sub> H <sub>8</sub> O <sub>3</sub>                  |
| 201.0678 | 7.7                | 201.0682         | -2.2        | -0.4        | 3.5  | C <sub>10</sub> H <sub>14</sub> O <sub>2</sub> Cl <sub>1</sub> |
|          |                    | 201.0704         | -13.1       | -2.6        | 12.5 | C <sub>16</sub> H <sub>9</sub>                                 |
|          |                    | 201.0552         | 62.7        | 12.6        | 8.5  | C <sub>12</sub> H <sub>9</sub> O <sub>3</sub>                  |
| 202.0746 | 2.5                | 202.0761         | -7.0        | -1.4        | 3.0  | C <sub>10</sub> H <sub>15</sub> O <sub>2</sub> Cl <sub>1</sub> |
|          |                    | 202.0783         | -17.9       | -3.6        | 12.0 | C <sub>16</sub> H <sub>10</sub>                                |
|          |                    | 202.0630         | 57.6        | 11.6        | 8.0  | C <sub>12</sub> H <sub>10</sub> O <sub>3</sub>                 |
|          |                    | 202.0549         | 97.5        | 19.7        | 8.0  | C <sub>13</sub> H <sub>11</sub> Cl <sub>1</sub>                |
| 203.0840 | 0.9                | 203.0839         | 0.4         | 0.1         | 2.5  | C <sub>10</sub> H <sub>16</sub> O <sub>2</sub> Cl <sub>1</sub> |
|          |                    | 203.0861         | -10.4       | -2.1        | 11.5 | C <sub>16</sub> H <sub>11</sub>                                |
|          |                    | 203.0708         | 64.8        | 13.2        | 7.5  | C <sub>12</sub> H <sub>11</sub> O <sub>3</sub>                 |
| 216.0393 | 0.9                | 216.0423         | -13.5       | -2.9        | 9.0  | C <sub>12</sub> H <sub>8</sub> O <sub>4</sub>                  |
|          |                    | 216.0342         | 23.8        | 5.1         | 9.0  | C <sub>13</sub> H <sub>9</sub> O <sub>1</sub> Cl <sub>1</sub>  |
|          |                    | 216.0320         | 34.0        | 7.3         | 0.0  | C <sub>7</sub> H <sub>4</sub> O <sub>3</sub> Cl <sub>2</sub>   |
|          |                    | 216.0473         | -36.6       | -7.9        | 4.0  | C <sub>11</sub> H <sub>14</sub> Cl <sub>2</sub>                |
| 217.0496 | 55.5               | 217.0501         | -2.3        | -0.5        | 8.5  | C <sub>12</sub> H <sub>9</sub> O <sub>4</sub>                  |
|          |                    | 217.0551         | -25.3       | -5.5        | 3.5  | C <sub>11</sub> H <sub>15</sub> Cl <sub>2</sub>                |
|          |                    | 217.0420         | 34.9        | 7.6         | 8.5  | C <sub>13</sub> H <sub>10</sub> O <sub>1</sub> Cl <sub>1</sub> |
|          |                    | 217.0631         | -62.4       | -13.6       | 3.5  | C <sub>10</sub> H <sub>14</sub> O <sub>3</sub> Cl <sub>1</sub> |
| 218.0542 | 7.3                | 218.0579         | -17.0       | -3.7        | 8.0  | C <sub>12</sub> H <sub>10</sub> O <sub>4</sub>                 |
|          |                    | 218.0498         | 19.9        | 4.3         | 8.0  | C <sub>13</sub> H <sub>11</sub> O <sub>1</sub> Cl <sub>1</sub> |
|          |                    | 218.0629         | -40.0       | -8.7        | 3.0  | C <sub>11</sub> H <sub>16</sub> Cl <sub>2</sub>                |
|          |                    | 218.0710         | -77.0       | -16.8       | 3.0  | C <sub>10</sub> H <sub>15</sub> O <sub>3</sub> Cl <sub>1</sub> |
| 312.9658 | 0.7                | 312.9692         | -11.0       | -3.5        | 18.5 | C <sub>19</sub> H <sub>2</sub> O <sub>3</sub> Cl <sub>1</sub>  |
|          |                    | 312.9612         | 14.7        | 4.6         | 18.5 | C <sub>20</sub> H <sub>3</sub> Cl <sub>2</sub>                 |
|          |                    | 312.9823         | -52.8       | -16.5       | 13.5 | C <sub>17</sub> H <sub>7</sub> O <sub>2</sub> Cl <sub>2</sub>  |
|          |                    | 312.9845         | -59.8       | -18.7       | 22.5 | C <sub>23</sub> H <sub>2</sub> Cl <sub>1</sub>                 |
| 314.9608 | 0.7                | 314.9616         | -2.5        | -0.8        | 13.5 | C <sub>16</sub> H <sub>5</sub> O <sub>3</sub> Cl <sub>2</sub>  |
|          |                    | 314.9638         | -9.5        | -3.0        | 22.5 | C <sub>22</sub> O <sub>1</sub> Cl <sub>1</sub>                 |
|          |                    | 314.9485         | 39.0        | 12.3        | 18.5 | C <sub>18</sub> O <sub>4</sub> Cl <sub>1</sub>                 |
|          |                    | 314.9768         | -50.9       | -16.0       | 17.5 | C <sub>20</sub> H <sub>5</sub> Cl <sub>2</sub>                 |
| 347.9392 | 0.8                | 347.9381         | 3.2         | 1.1         | 18.0 | C <sub>19</sub> H <sub>2</sub> O <sub>3</sub> Cl <sub>2</sub>  |
|          |                    | 347.9534         | -40.6       | -14.1       | 22.0 | C <sub>23</sub> H <sub>2</sub> Cl <sub>2</sub>                 |
|          |                    | 347.9614         | -63.8       | -22.2       | 22.0 | C <sub>22</sub> H <sub>1</sub> O <sub>3</sub> Cl <sub>1</sub>  |
| 349.9209 | 0.7                | 349.9174         | 10.1        | 3.5         | 18.0 | C <sub>18</sub> O <sub>4</sub> Cl <sub>2</sub>                 |
|          |                    | 349.9326         | -33.5       | -11.7       | 22.0 | C <sub>22</sub> O <sub>1</sub> Cl <sub>2</sub>                 |
|          |                    | 349.9537         | -93.8       | -32.8       | 17.0 | C <sub>19</sub> H <sub>4</sub> O <sub>3</sub> Cl <sub>2</sub>  |
| 376.0257 | 9.1                | 376.0269         | -3.1        | -1.2        | 12.0 | C <sub>19</sub> H <sub>14</sub> O <sub>4</sub> Cl <sub>2</sub> |
|          |                    | 376.0291         | -8.9        | -3.4        | 21.0 | C <sub>25</sub> H <sub>9</sub> O <sub>2</sub> Cl <sub>1</sub>  |
|          |                    | 376.0313         | -14.8       | -5.6        | 30.0 | C <sub>31</sub> H <sub>4</sub>                                 |
|          |                    | 376.0160         | 25.8        | 9.7         | 26.0 | C <sub>27</sub> H <sub>4</sub> O <sub>3</sub>                  |
| 377.0280 | 2.1                | 377.0239         | 10.9        | 4.1         | 25.5 | C <sub>27</sub> H <sub>5</sub> O <sub>3</sub>                  |
|          |                    | 377.0347         | -18.0       | -6.8        | 11.5 | C <sub>19</sub> H <sub>15</sub> O <sub>4</sub> Cl <sub>2</sub> |
|          |                    | 377.0369         | -23.8       | -9.0        | 20.5 | C <sub>25</sub> H <sub>10</sub> O <sub>2</sub> Cl <sub>1</sub> |
|          |                    | 377.0391         | -29.6       | -11.2       | 29.5 | C <sub>31</sub> H <sub>5</sub>                                 |

# Compound # 10

| Mass     | Relative Intensity | Theoretical Mass | Delta [ppm] | Delta [mmu] | RDB  | Composition                                                    |
|----------|--------------------|------------------|-------------|-------------|------|----------------------------------------------------------------|
|          |                    | 201.0188         | 17.3        | 3.5         | 9.5  | C <sub>11</sub> H <sub>5</sub> O <sub>4</sub>                  |
|          |                    | 201.0318         | -47.7       | -9.6        | 4.5  | C <sub>9</sub> H <sub>10</sub> O <sub>3</sub> Cl <sub>1</sub>  |
| 202.0456 | 1.5                | 202.0419         | 18.3        | 3.7         | 13.0 | C <sub>15</sub> H <sub>6</sub> O <sub>1</sub>                  |
|          |                    | 202.0397         | 29.1        | 5.9         | 4.0  | C <sub>9</sub> H <sub>11</sub> O <sub>3</sub> Cl <sub>1</sub>  |
|          |                    | 202.0549         | -46.4       | -9.4        | 8.0  | C <sub>13</sub> H <sub>11</sub> Cl <sub>1</sub>                |
| 217.0583 | 35.1               | 217.0551         | 14.9        | 3.2         | 3.5  | C <sub>11</sub> H <sub>15</sub> Cl <sub>2</sub>                |
|          |                    | 217.0631         | -22.3       | -4.8        | 3.5  | C <sub>10</sub> H <sub>14</sub> O <sub>3</sub> Cl <sub>1</sub> |
|          |                    | 217.0653         | -32.4       | -7.0        | 12.5 | C <sub>16</sub> H <sub>9</sub> O <sub>1</sub>                  |
| 218.0592 | 5.7                | 218.0579         | 5.9         | 1.3         | 8.0  | C <sub>12</sub> H <sub>10</sub> O <sub>4</sub>                 |
|          |                    | 218.0629         | -17.0       | -3.7        | 3.0  | C <sub>11</sub> H <sub>16</sub> Cl <sub>2</sub>                |
|          |                    | 218.0498         | 42.9        | 9.3         | 8.0  | C <sub>13</sub> H <sub>11</sub> O <sub>1</sub> Cl <sub>1</sub> |
| 219.0602 | 1.2                | 219.0577         | 11.5        | 2.5         | 7.5  | C <sub>13</sub> H <sub>12</sub> O <sub>1</sub> Cl <sub>1</sub> |
|          |                    | 219.0657         | -25.3       | -5.5        | 7.5  | C <sub>12</sub> H <sub>11</sub> O <sub>4</sub>                 |
|          |                    | 219.0707         | -48.1       | -10.5       | 2.5  | C <sub>11</sub> H <sub>17</sub> Cl <sub>2</sub>                |
| 230.8980 | 6.6                |                  |             |             |      |                                                                |
| 376.0273 | 7.1                | 376.0269         | 1.1         | 0.4         | 12.0 | C <sub>19</sub> H <sub>14</sub> O <sub>4</sub> Cl <sub>2</sub> |
|          |                    | 376.0291         | -4.7        | -1.8        | 21.0 | C <sub>25</sub> H <sub>9</sub> O <sub>2</sub> Cl <sub>1</sub>  |
|          |                    | 376.0313         | -10.6       | -4.0        | 30.0 | C <sub>31</sub> H <sub>4</sub>                                 |
| 377.0252 | 1.8                | 377.0239         | 3.6         | 1.4         | 25.5 | C <sub>27</sub> H <sub>5</sub> O <sub>3</sub>                  |
|          |                    | 377.0217         | 9.5         | 3.6         | 16.5 | C <sub>21</sub> H <sub>10</sub> O <sub>5</sub> Cl <sub>1</sub> |
|          |                    | 377.0158         | 25.0        | 9.4         | 25.5 | C <sub>28</sub> H <sub>6</sub> Cl <sub>1</sub>                 |
| 378.0265 | 4.7                | 378.0236         | 7.7         | 2.9         | 25.0 | C <sub>28</sub> H <sub>7</sub> Cl <sub>1</sub>                 |
|          |                    | 378.0295         | -7.8        | -3.0        | 16.0 | C <sub>21</sub> H <sub>11</sub> O <sub>5</sub> Cl <sub>1</sub> |
|          |                    | 378.0214         | 13.5        | 5.1         | 16.0 | C <sub>22</sub> H <sub>12</sub> O <sub>2</sub> Cl <sub>2</sub> |
| 379.0199 | 1.1                | 379.0184         | 4.1         | 1.6         | 29.5 | C <sub>30</sub> H <sub>3</sub> O <sub>1</sub>                  |
|          |                    | 379.0162         | 9.9         | 3.7         | 20.5 | C <sub>24</sub> H <sub>8</sub> O <sub>3</sub> Cl <sub>1</sub>  |
|          |                    | 379.0140         | 15.7        | 5.9         | 11.5 | C <sub>18</sub> H <sub>13</sub> O <sub>5</sub> Cl <sub>2</sub> |
| 380.0234 | 1.1                | 380.0240         | -1.6        | -0.6        | 20.0 | C <sub>24</sub> H <sub>9</sub> O <sub>3</sub> Cl <sub>1</sub>  |
|          |                    | 380.0218         | 4.1         | 1.6         | 11.0 | C <sub>18</sub> H <sub>14</sub> O <sub>5</sub> Cl <sub>2</sub> |
|          |                    | 380.0262         | -7.4        | -2.8        | 29.0 | C <sub>30</sub> H <sub>4</sub> O <sub>1</sub>                  |

Compound # 11

| Mass     | Relative Intensity | Theoretical Mass | Delta [ppm] | Delta [mmu] | RDB                                           | Composition                                                    |      |                                                                |
|----------|--------------------|------------------|-------------|-------------|-----------------------------------------------|----------------------------------------------------------------|------|----------------------------------------------------------------|
| 188.0453 | 1.3                | 188.0473         | -10.7       | -2.0        | 8.0                                           | C <sub>11</sub> H <sub>8</sub> O <sub>3</sub>                  |      |                                                                |
|          |                    | 188.0393         | 32.2        | 6.1         | 8.0                                           | C <sub>12</sub> H <sub>9</sub> Cl <sub>1</sub>                 |      |                                                                |
|          |                    | 188.0604         | -80.2       | -15.1       | 3.0                                           | C <sub>9</sub> H <sub>13</sub> O <sub>2</sub> Cl <sub>1</sub>  |      |                                                                |
|          |                    | 188.0626         | -91.8       | -17.3       | 12.0                                          | C <sub>15</sub> H <sub>8</sub>                                 |      |                                                                |
| 189.0600 | 2.2                | 189.0552         | 25.8        | 4.9         | 7.5                                           | C <sub>11</sub> H <sub>9</sub> O <sub>3</sub>                  |      |                                                                |
|          |                    | 189.0682         | -43.3       | -8.2        | 2.5                                           | C <sub>9</sub> H <sub>14</sub> O <sub>2</sub> Cl <sub>1</sub>  |      |                                                                |
|          |                    | 189.0704         | -54.9       | -10.4       | 11.5                                          | C <sub>15</sub> H <sub>9</sub>                                 |      |                                                                |
|          |                    | 189.0471         | 68.4        | 12.9        | 7.5                                           | C <sub>12</sub> H <sub>10</sub> Cl <sub>1</sub>                |      |                                                                |
|          |                    | 199.0394         | 2.6         | 199.0395    | -0.7                                          | -0.1                                                           | 9.5  | C <sub>12</sub> H <sub>7</sub> O <sub>3</sub>                  |
| 199.0394 | 2.6                | 199.0315         | 39.9        | 7.9         | 9.5                                           | C <sub>13</sub> H <sub>8</sub> Cl <sub>1</sub>                 |      |                                                                |
|          |                    | 199.0293         | 50.9        | 10.1        | 0.5                                           | C <sub>7</sub> H <sub>13</sub> O <sub>2</sub> Cl <sub>2</sub>  |      |                                                                |
|          |                    | 199.0526         | -66.3       | -13.2       | 4.5                                           | C <sub>10</sub> H <sub>12</sub> O <sub>2</sub> Cl <sub>1</sub> |      |                                                                |
|          |                    | 200.0464         | 0.8         | 200.0473    | -4.8                                          | -1.0                                                           | 9.0  | C <sub>12</sub> H <sub>8</sub> O <sub>3</sub>                  |
|          |                    | 200.0393         | 35.5        | 7.1         | 9.0                                           | C <sub>13</sub> H <sub>9</sub> Cl <sub>1</sub>                 |      |                                                                |
| 200.0464 | 0.8                | 200.0371         | 46.5        | 9.3         | 0.0                                           | C <sub>7</sub> H <sub>14</sub> O <sub>2</sub> Cl <sub>2</sub>  |      |                                                                |
|          |                    | 200.0604         | -70.1       | -14.0       | 4.0                                           | C <sub>10</sub> H <sub>13</sub> O <sub>2</sub> Cl <sub>1</sub> |      |                                                                |
|          |                    | 201.0532         | 2.9         | 201.0552    | -9.7                                          | -2.0                                                           | 8.5  | C <sub>12</sub> H <sub>9</sub> O <sub>3</sub>                  |
|          |                    | 201.0471         | 30.4        | 6.1         | 8.5                                           | C <sub>13</sub> H <sub>10</sub> Cl <sub>1</sub>                |      |                                                                |
|          |                    | 201.0682         | -74.7       | -15.0       | 3.5                                           | C <sub>10</sub> H <sub>14</sub> O <sub>2</sub> Cl <sub>1</sub> |      |                                                                |
| 201.0532 | 2.9                | 201.0704         | -85.6       | -17.2       | 12.5                                          | C <sub>16</sub> H <sub>9</sub>                                 |      |                                                                |
|          |                    | 202.0667         | 1.0         | 202.0630    | 18.3                                          | 3.7                                                            | 8.0  | C <sub>12</sub> H <sub>10</sub> O <sub>3</sub>                 |
|          |                    | 202.0761         | -46.3       | -9.4        | 3.0                                           | C <sub>10</sub> H <sub>15</sub> O <sub>2</sub> Cl <sub>1</sub> |      |                                                                |
|          |                    | 202.0783         | -57.2       | -11.6       | 12.0                                          | C <sub>16</sub> H <sub>10</sub>                                |      |                                                                |
|          |                    | 202.0549         | 58.3        | 11.8        | 8.0                                           | C <sub>13</sub> H <sub>11</sub> Cl <sub>1</sub>                |      |                                                                |
| 216.0475 | 0.6                | 216.0473         | 1.0         | 0.2         | 4.0                                           | C <sub>11</sub> H <sub>14</sub> Cl <sub>2</sub>                |      |                                                                |
|          |                    | 216.0423         | 24.1        | 5.2         | 9.0                                           | C <sub>12</sub> H <sub>8</sub> O <sub>4</sub>                  |      |                                                                |
|          |                    | 216.0553         | -36.4       | -7.9        | 4.0                                           | C <sub>10</sub> H <sub>13</sub> O <sub>3</sub> Cl <sub>1</sub> |      |                                                                |
|          |                    | 216.0575         | -46.5       | -10.0       | 13.0                                          | C <sub>16</sub> H <sub>8</sub> O <sub>1</sub>                  |      |                                                                |
|          |                    | 217.0498         | 14.2        | 217.0501    | -1.5                                          | -0.3                                                           | 8.5  | C <sub>12</sub> H <sub>9</sub> O <sub>4</sub>                  |
| 217.0498 | 14.2               | 217.0551         | -24.5       | -5.3        | 3.5                                           | C <sub>11</sub> H <sub>15</sub> Cl <sub>2</sub>                |      |                                                                |
|          |                    | 217.0420         | 35.7        | 7.7         | 8.5                                           | C <sub>13</sub> H <sub>10</sub> O <sub>1</sub> Cl <sub>1</sub> |      |                                                                |
|          |                    | 217.0631         | -61.7       | -13.4       | 3.5                                           | C <sub>10</sub> H <sub>14</sub> O <sub>3</sub> Cl <sub>1</sub> |      |                                                                |
|          |                    | 218.0567         | 2.5         | 218.0579    | -5.4                                          | -1.2                                                           | 8.0  | C <sub>12</sub> H <sub>10</sub> O <sub>4</sub>                 |
|          |                    | 218.0629         | -28.3       | -6.2        | 3.0                                           | C <sub>11</sub> H <sub>16</sub> Cl <sub>2</sub>                |      |                                                                |
| 218.0567 | 2.5                | 218.0498         | 31.6        | 6.9         | 8.0                                           | C <sub>13</sub> H <sub>11</sub> O <sub>1</sub> Cl <sub>1</sub> |      |                                                                |
|          |                    | 218.0710         | -65.3       | -14.2       | 3.0                                           | C <sub>10</sub> H <sub>15</sub> O <sub>3</sub> Cl <sub>1</sub> |      |                                                                |
|          |                    | 273.1272         | 1.2         | 273.1279    | -2.6                                          | -0.7                                                           | 12.5 | C <sub>20</sub> H <sub>17</sub> O <sub>1</sub>                 |
|          |                    | 273.1257         | 5.4         | 1.5         | 3.5                                           | C <sub>14</sub> H <sub>22</sub> O <sub>3</sub> Cl <sub>1</sub> |      |                                                                |
|          |                    | 273.1177         | 34.9        | 9.5         | 3.5                                           | C <sub>15</sub> H <sub>23</sub> Cl <sub>2</sub>                |      |                                                                |
| 273.1272 | 1.2                | 273.1410         | -50.5       | -13.8       | 7.5                                           | C <sub>18</sub> H <sub>22</sub> Cl <sub>1</sub>                |      |                                                                |
|          |                    | 274.1351         | 0.9         | 274.1358    | -2.3                                          | -0.6                                                           | 12.0 | C <sub>20</sub> H <sub>18</sub> O <sub>1</sub>                 |
|          |                    | 274.1336         | 5.7         | 1.6         | 3.0                                           | C <sub>14</sub> H <sub>23</sub> O <sub>3</sub> Cl <sub>1</sub> |      |                                                                |
|          |                    | 274.1255         | 35.1        | 9.6         | 3.0                                           | C <sub>15</sub> H <sub>24</sub> Cl <sub>2</sub>                |      |                                                                |
|          |                    | 274.1488         | -49.9       | -13.7       | 7.0                                           | C <sub>18</sub> H <sub>23</sub> Cl <sub>1</sub>                |      |                                                                |
| 331.9937 | 0.5                | 331.9898         | 11.6        | 3.8         | 26.0                                          | C <sub>25</sub> O <sub>2</sub>                                 |      |                                                                |
|          |                    | 331.9876         | 18.2        | 6.0         | 17.0                                          | C <sub>19</sub> H <sub>5</sub> O <sub>4</sub> Cl <sub>1</sub>  |      |                                                                |
|          |                    | 332.0007         | -21.2       | -7.0        | 12.0                                          | C <sub>17</sub> H <sub>10</sub> O <sub>3</sub> Cl <sub>2</sub> |      |                                                                |
|          |                    | 332.0029         | -27.8       | -9.2        | 21.0                                          | C <sub>23</sub> H <sub>5</sub> O <sub>1</sub> Cl <sub>1</sub>  |      |                                                                |
|          |                    | 376.0276         | 4.7         | 376.0269    | 1.7                                           | 0.6                                                            | 12.0 | C <sub>19</sub> H <sub>14</sub> O <sub>4</sub> Cl <sub>2</sub> |
| 376.0276 | 4.7                | 376.0291         | -4.1        | -1.6        | 21.0                                          | C <sub>25</sub> H <sub>9</sub> O <sub>2</sub> Cl <sub>1</sub>  |      |                                                                |
|          |                    | 376.0313         | -10.0       | -3.7        | 30.0                                          | C <sub>31</sub> H <sub>4</sub>                                 |      |                                                                |
|          |                    | 376.0160         | 30.6        | 11.5        | 26.0                                          | C <sub>27</sub> H <sub>8</sub> O <sub>3</sub>                  |      |                                                                |
|          |                    | 377.0286         | 1.1         | 377.0239    | 12.4                                          | 4.7                                                            | 25.5 | C <sub>27</sub> H <sub>5</sub> O <sub>3</sub>                  |
|          |                    | 377.0347         | -16.4       | -6.2        | 11.5                                          | C <sub>19</sub> H <sub>15</sub> O <sub>4</sub> Cl <sub>2</sub> |      |                                                                |
| 377.0286 | 1.1                | 377.0369         | -22.2       | -8.4        | 20.5                                          | C <sub>25</sub> H <sub>10</sub> O <sub>2</sub> Cl <sub>1</sub> |      |                                                                |
|          |                    | 377.0391         | -28.0       | -10.6       | 29.5                                          | C <sub>31</sub> H <sub>5</sub>                                 |      |                                                                |
|          |                    | 378.0259         | 3.1         | 378.0236    | 6.0                                           | 2.3                                                            | 25.0 | C <sub>28</sub> H <sub>7</sub> Cl <sub>1</sub>                 |
|          |                    | 378.0214         | 11.8        | 4.5         | 16.0                                          | C <sub>22</sub> H <sub>12</sub> O <sub>2</sub> Cl <sub>2</sub> |      |                                                                |
|          |                    | 378.0317         | -15.3       | -5.8        | 25.0                                          | C <sub>27</sub> H <sub>6</sub> O <sub>3</sub>                  |      |                                                                |
| 378.0106 | 40.6               | 40.6             | 15.3        | 30.0        | C <sub>30</sub> H <sub>2</sub> O <sub>1</sub> |                                                                |      |                                                                |

Compound # 12

| Mass     | Relative Intensity | Theoretical Mass | Delta [ppm] | Delta [mmu] | RDB  | Composition                                                                   |
|----------|--------------------|------------------|-------------|-------------|------|-------------------------------------------------------------------------------|
|          |                    | 201.0563         | -5.0        | -1.0        | 4.5  | C <sub>9</sub> H <sub>10</sub> O <sub>4</sub> F <sub>1</sub>                  |
|          |                    | 201.0482         | 35.1        | 7.1         | 4.5  | C <sub>10</sub> H <sub>11</sub> O <sub>1</sub> Cl <sub>1</sub> F <sub>1</sub> |
| 202.0603 | 2.2                | 202.0630         | -13.3       | -2.7        | 8.0  | C <sub>12</sub> H <sub>10</sub> O <sub>3</sub>                                |
|          |                    | 202.0641         | -19.0       | -3.8        | 4.0  | C <sub>9</sub> H <sub>11</sub> O <sub>4</sub> F <sub>1</sub>                  |
|          |                    | 202.0561         | 20.9        | 4.2         | 4.0  | C <sub>10</sub> H <sub>12</sub> O <sub>1</sub> Cl <sub>1</sub> F <sub>1</sub> |
| 207.0572 | 0.6                | 207.0577         | -2.3        | -0.5        | 6.5  | C <sub>12</sub> H <sub>12</sub> O <sub>1</sub> Cl <sub>1</sub>                |
|          |                    | 207.0588         | -7.8        | -1.6        | 2.5  | C <sub>9</sub> H <sub>13</sub> O <sub>2</sub> Cl <sub>1</sub> F <sub>1</sub>  |
|          |                    | 207.0610         | -18.4       | -3.8        | 11.5 | C <sub>15</sub> H <sub>8</sub> F <sub>1</sub>                                 |
| 216.0431 | 1.5                | 216.0434         | -1.2        | -0.3        | 5.0  | C <sub>9</sub> H <sub>9</sub> O <sub>5</sub> F <sub>1</sub>                   |
|          |                    | 216.0423         | 4.1         | 0.9         | 9.0  | C <sub>12</sub> H <sub>8</sub> O <sub>4</sub>                                 |
|          |                    | 216.0401         | 14.3        | 3.1         | 0.0  | C <sub>6</sub> H <sub>13</sub> O <sub>6</sub> Cl <sub>1</sub>                 |
| 217.0490 | 95.7               | 217.0501         | -4.8        | -1.0        | 8.5  | C <sub>12</sub> H <sub>9</sub> O <sub>4</sub>                                 |
|          |                    | 217.0512         | -10.0       | -2.2        | 4.5  | C <sub>9</sub> H <sub>10</sub> O <sub>5</sub> F <sub>1</sub>                  |
|          |                    | 217.0454         | 17.0        | 3.7         | 13.5 | C <sub>16</sub> H <sub>6</sub> F <sub>1</sub>                                 |
| 218.0521 | 13.7               | 218.0532         | -4.9        | -1.1        | 13.0 | C <sub>16</sub> H <sub>7</sub> F <sub>1</sub>                                 |
|          |                    | 218.0510         | 5.2         | 1.1         | 4.0  | C <sub>10</sub> H <sub>12</sub> O <sub>2</sub> Cl <sub>1</sub> F <sub>1</sub> |
|          |                    | 218.0498         | 10.4        | 2.3         | 8.0  | C <sub>13</sub> H <sub>11</sub> O <sub>1</sub> Cl <sub>1</sub>                |
| 219.0522 | 2.3                | 219.0505         | 7.7         | 1.7         | 3.5  | C <sub>8</sub> H <sub>11</sub> O <sub>7</sub>                                 |
|          |                    | 219.0577         | -25.2       | -5.5        | 7.5  | C <sub>13</sub> H <sub>12</sub> O <sub>1</sub> Cl <sub>1</sub>                |
|          |                    | 219.0457         | 29.2        | 6.4         | 8.5  | C <sub>12</sub> H <sub>8</sub> O <sub>3</sub> F <sub>1</sub>                  |
| 220.0667 | 1.2                | 220.0666         | 0.4         | 0.1         | 3.0  | C <sub>10</sub> H <sub>14</sub> O <sub>2</sub> Cl <sub>1</sub> F <sub>1</sub> |
|          |                    | 220.0655         | 5.6         | 1.2         | 7.0  | C <sub>13</sub> H <sub>13</sub> O <sub>1</sub> Cl <sub>1</sub>                |
|          |                    | 220.0688         | -9.6        | -2.1        | 12.0 | C <sub>16</sub> H <sub>9</sub> F <sub>1</sub>                                 |
| 221.0754 | 1.2                | 221.0745         | 4.3         | 0.9         | 2.5  | C <sub>10</sub> H <sub>15</sub> O <sub>2</sub> Cl <sub>1</sub> F <sub>1</sub> |
|          |                    | 221.0767         | -5.7        | -1.3        | 11.5 | C <sub>16</sub> H <sub>10</sub> F <sub>1</sub>                                |
|          |                    | 221.0733         | 9.4         | 2.1         | 6.5  | C <sub>13</sub> H <sub>14</sub> O <sub>1</sub> Cl <sub>1</sub>                |
| 222.0823 | 0.7                | 222.0823         | 0.1         | 0.0         | 2.0  | C <sub>10</sub> H <sub>16</sub> O <sub>2</sub> Cl <sub>1</sub> F <sub>1</sub> |
|          |                    | 222.0811         | 5.2         | 1.2         | 6.0  | C <sub>13</sub> H <sub>15</sub> O <sub>1</sub> Cl <sub>1</sub>                |
|          |                    | 222.0845         | -9.8        | -2.2        | 11.0 | C <sub>16</sub> H <sub>11</sub> F <sub>1</sub>                                |
| 247.0363 | 0.5                | 247.0373         | -4.3        | -1.1        | 4.5  | C <sub>10</sub> H <sub>12</sub> O <sub>5</sub> Cl <sub>1</sub>                |
|          |                    | 247.0385         | -8.9        | -2.2        | 0.5  | C <sub>7</sub> H <sub>13</sub> O <sub>6</sub> Cl <sub>1</sub> F <sub>1</sub>  |
|          |                    | 247.0395         | -13.2       | -3.3        | 13.5 | C <sub>16</sub> H <sub>7</sub> O <sub>3</sub>                                 |
| 249.0646 | 0.7                | 249.0682         | -14.5       | -3.6        | 7.5  | C <sub>14</sub> H <sub>14</sub> O <sub>2</sub> Cl <sub>1</sub>                |
|          |                    | 249.0694         | -19.1       | -4.8        | 3.5  | C <sub>11</sub> H <sub>15</sub> O <sub>3</sub> Cl <sub>1</sub> F <sub>1</sub> |
|          |                    | 249.0704         | -23.3       | -5.8        | 16.5 | C <sub>20</sub> H <sub>9</sub>                                                |
| 277.0415 | 4.4                | 277.0420         | -1.8        | -0.5        | 13.5 | C <sub>18</sub> H <sub>10</sub> O <sub>1</sub> Cl <sub>1</sub>                |
|          |                    | 277.0432         | -5.9        | -1.6        | 9.5  | C <sub>15</sub> H <sub>11</sub> O <sub>2</sub> Cl <sub>1</sub> F <sub>1</sub> |
|          |                    | 277.0454         | -13.8       | -3.8        | 18.5 | C <sub>21</sub> H <sub>6</sub> F <sub>1</sub>                                 |
| 278.0469 | 0.8                | 278.0498         | -10.5       | -2.9        | 13.0 | C <sub>18</sub> H <sub>11</sub> O <sub>1</sub> Cl <sub>1</sub>                |
|          |                    | 278.0510         | -14.6       | -4.1        | 9.0  | C <sub>15</sub> H <sub>12</sub> O <sub>2</sub> Cl <sub>1</sub> F <sub>1</sub> |
|          |                    | 278.0427         | 15.4        | 4.3         | 9.0  | C <sub>13</sub> H <sub>10</sub> O <sub>7</sub>                                |
| 279.0412 | 1.8                | 279.0424         | -4.5        | -1.3        | 8.5  | C <sub>14</sub> H <sub>12</sub> O <sub>4</sub> Cl <sub>1</sub>                |
|          |                    | 279.0436         | -8.6        | -2.4        | 4.5  | C <sub>11</sub> H <sub>13</sub> O <sub>5</sub> Cl <sub>1</sub> F <sub>1</sub> |
|          |                    | 279.0446         | -12.3       | -3.4        | 17.5 | C <sub>20</sub> H <sub>7</sub> O <sub>2</sub>                                 |
| 280.0709 | 0.5                | 280.0714         | -1.6        | -0.5        | 3.0  | C <sub>11</sub> H <sub>17</sub> O <sub>6</sub> Cl <sub>1</sub>                |
|          |                    | 280.0688         | 7.4         | 2.1         | 17.0 | C <sub>21</sub> H <sub>9</sub> F <sub>1</sub>                                 |
|          |                    | 280.0736         | -9.4        | -2.6        | 12.0 | C <sub>17</sub> H <sub>12</sub> O <sub>4</sub>                                |
| 360.0565 | 23.9               | 360.0565         | 0.1         | 0.0         | 12.0 | C <sub>19</sub> H <sub>14</sub> O <sub>4</sub> Cl <sub>1</sub> F <sub>1</sub> |
|          |                    | 360.0575         | -2.8        | -1.0        | 25.0 | C <sub>28</sub> H <sub>8</sub> O <sub>1</sub>                                 |
|          |                    | 360.0553         | 3.3         | 1.2         | 16.0 | C <sub>22</sub> H <sub>13</sub> O <sub>3</sub> Cl <sub>1</sub>                |
| 361.0603 | 4.8                | 361.0631         | -8.0        | -2.9        | 15.5 | C <sub>22</sub> H <sub>14</sub> O <sub>3</sub> Cl <sub>1</sub>                |
|          |                    | 361.0643         | -11.2       | -4.0        | 11.5 | C <sub>19</sub> H <sub>15</sub> O <sub>4</sub> Cl <sub>1</sub> F <sub>1</sub> |
|          |                    | 361.0653         | -14.1       | -5.1        | 24.5 | C <sub>28</sub> H <sub>9</sub> O <sub>1</sub>                                 |
| 362.0580 | 8.3                | 362.0579         | 0.3         | 0.1         | 20.0 | C <sub>24</sub> H <sub>10</sub> O <sub>4</sub>                                |
|          |                    | 362.0591         | -2.8        | -1.0        | 16.0 | C <sub>21</sub> H <sub>11</sub> O <sub>5</sub> F <sub>1</sub>                 |
|          |                    | 362.0569         | 3.2         | 1.2         | 7.0  | C <sub>15</sub> H <sub>16</sub> O <sub>7</sub> Cl <sub>1</sub> F <sub>1</sub> |

Compound # 13

| Mass     | Relative Intensity | Theoretical Mass | Delta [ppm] | Delta [mmu] | RDB  | Composition                                                   |
|----------|--------------------|------------------|-------------|-------------|------|---------------------------------------------------------------|
| 147.0449 | 1.0                | 145.0665         | -18.2       | -2.6        | 2.5  | C <sub>7</sub> H <sub>10</sub> O <sub>2</sub> F <sub>1</sub>  |
|          |                    | 147.0446         | 2.3         | 0.3         | 6.5  | C <sub>9</sub> H <sub>7</sub> O <sub>2</sub>                  |
|          |                    | 147.0457         | -5.5        | -0.8        | 2.5  | C <sub>6</sub> H <sub>8</sub> O <sub>3</sub> F <sub>1</sub>   |
| 149.0237 | 10.7               | 149.0239         | -1.0        | -0.1        | 6.5  | C <sub>8</sub> H <sub>5</sub> O <sub>3</sub>                  |
|          |                    | 149.0250         | -8.7        | -1.3        | 2.5  | C <sub>5</sub> H <sub>6</sub> O <sub>4</sub> F <sub>1</sub>   |
| 150.0240 | 1.3                |                  |             |             |      |                                                               |
| 159.0397 | 7.3                | 159.0446         | -30.9       | -4.9        | 7.5  | C <sub>10</sub> H <sub>7</sub> O <sub>2</sub>                 |
|          |                    | 159.0457         | -38.1       | -6.1        | 3.5  | C <sub>7</sub> H <sub>8</sub> O <sub>3</sub> F <sub>1</sub>   |
| 160.0461 | 1.0                | 160.0524         | -39.5       | -6.3        | 7.0  | C <sub>10</sub> H <sub>8</sub> O <sub>2</sub>                 |
|          |                    | 160.0536         | -46.7       | -7.5        | 3.0  | C <sub>7</sub> H <sub>9</sub> O <sub>3</sub> F <sub>1</sub>   |
| 161.0622 | 1.4                | 161.0614         | 5.1         | 0.8         | 2.5  | C <sub>7</sub> H <sub>10</sub> O <sub>3</sub> F <sub>1</sub>  |
|          |                    | 161.0603         | 12.2        | 2.0         | 6.5  | C <sub>10</sub> H <sub>9</sub> O <sub>2</sub>                 |
| 167.0320 | 2.7                | 167.0297         | 13.6        | 2.3         | 10.5 | C <sub>12</sub> H <sub>4</sub> F <sub>1</sub>                 |
|          |                    | 167.0344         | -14.7       | -2.5        | 5.5  | C <sub>8</sub> H <sub>7</sub> O <sub>4</sub>                  |
|          |                    | 167.0356         | -21.6       | -3.6        | 1.5  | C <sub>5</sub> H <sub>8</sub> O <sub>5</sub> F <sub>1</sub>   |
| 171.0510 | 4.5                | 171.0457         | 30.7        | 5.3         | 4.5  | C <sub>8</sub> H <sub>8</sub> O <sub>3</sub> F <sub>1</sub>   |
|          |                    | 171.0446         | 37.4        | 6.4         | 8.5  | C <sub>11</sub> H <sub>7</sub> O <sub>2</sub>                 |
| 172.0495 | 4.5                | 172.0524         | -16.9       | -2.9        | 8.0  | C <sub>11</sub> H <sub>8</sub> O <sub>2</sub>                 |
|          |                    | 172.0536         | -23.6       | -4.1        | 4.0  | C <sub>8</sub> H <sub>9</sub> O <sub>3</sub> F <sub>1</sub>   |
| 173.0624 | 17.6               | 173.0614         | 6.0         | 1.0         | 3.5  | C <sub>9</sub> H <sub>10</sub> O <sub>3</sub> F <sub>1</sub>  |
|          |                    | 173.0603         | 12.6        | 2.2         | 7.5  | C <sub>11</sub> H <sub>9</sub> O <sub>2</sub>                 |
| 174.0670 | 4.0                | 174.0681         | -6.0        | -1.0        | 7.0  | C <sub>11</sub> H <sub>10</sub> O <sub>2</sub>                |
|          |                    | 174.0692         | -12.6       | -2.2        | 3.0  | C <sub>8</sub> H <sub>11</sub> O <sub>3</sub> F <sub>1</sub>  |
| 175.0425 | 3.4                | 175.0407         | 10.3        | 1.8         | 3.5  | C <sub>7</sub> H <sub>8</sub> O <sub>4</sub> F <sub>1</sub>   |
|          |                    | 175.0395         | 16.8        | 2.9         | 7.5  | C <sub>10</sub> H <sub>7</sub> O <sub>3</sub>                 |
| 185.0714 | 0.5                | 185.0767         | -28.3       | -5.2        | 8.5  | C <sub>13</sub> H <sub>10</sub> F <sub>1</sub>                |
| 187.0358 | 9.7                | 187.0395         | -19.6       | -3.7        | 8.5  | C <sub>11</sub> H <sub>7</sub> O <sub>3</sub>                 |
|          |                    | 187.0407         | -25.7       | -4.8        | 4.5  | C <sub>8</sub> H <sub>8</sub> O <sub>4</sub> F <sub>1</sub>   |
| 188.0470 | 1.8                | 188.0473         | -1.9        | -0.4        | 8.0  | C <sub>11</sub> H <sub>8</sub> O <sub>3</sub>                 |
|          |                    | 188.0485         | -8.0        | -1.5        | 4.0  | C <sub>8</sub> H <sub>9</sub> O <sub>4</sub> F <sub>1</sub>   |
| 189.0564 | 3.7                | 189.0563         | 0.7         | 0.1         | 3.5  | C <sub>8</sub> H <sub>10</sub> O <sub>4</sub> F <sub>1</sub>  |
|          |                    | 189.0552         | 6.7         | 1.3         | 7.5  | C <sub>11</sub> H <sub>9</sub> O <sub>3</sub>                 |
| 190.0584 | 0.6                | 190.0630         | -24.3       | -4.6        | 7.0  | C <sub>11</sub> H <sub>10</sub> O <sub>3</sub>                |
|          |                    | 190.0641         | -30.3       | -5.8        | 3.0  | C <sub>8</sub> H <sub>11</sub> O <sub>4</sub> F <sub>1</sub>  |
| 199.0393 | 4.5                | 199.0395         | -1.1        | -0.2        | 9.5  | C <sub>12</sub> H <sub>7</sub> O <sub>3</sub>                 |
|          |                    | 199.0407         | -6.8        | -1.4        | 5.5  | C <sub>9</sub> H <sub>8</sub> O <sub>4</sub> F <sub>1</sub>   |
| 200.0488 | 1.2                | 200.0485         | 1.4         | 0.3         | 5.0  | C <sub>9</sub> H <sub>9</sub> O <sub>4</sub> F <sub>1</sub>   |
|          |                    | 200.0473         | 7.1         | 1.4         | 9.0  | C <sub>12</sub> H <sub>8</sub> O <sub>3</sub>                 |
| 201.0533 | 4.8                | 201.0552         | -9.5        | -1.9        | 8.5  | C <sub>12</sub> H <sub>9</sub> O <sub>3</sub>                 |
|          |                    | 201.0563         | -15.2       | -3.1        | 4.5  | C <sub>9</sub> H <sub>10</sub> O <sub>4</sub> F <sub>1</sub>  |
| 202.0618 | 1.4                | 202.0630         | -5.9        | -1.2        | 8.0  | C <sub>12</sub> H <sub>10</sub> O <sub>3</sub>                |
|          |                    | 202.0641         | -11.6       | -2.3        | 4.0  | C <sub>9</sub> H <sub>11</sub> O <sub>4</sub> F <sub>1</sub>  |
| 216.0350 | 0.7                | 216.0375         | -11.7       | -2.5        | 14.0 | C <sub>16</sub> H <sub>5</sub> F <sub>1</sub>                 |
|          |                    | 216.0423         | -33.6       | -7.3        | 9.0  | C <sub>12</sub> H <sub>8</sub> O <sub>4</sub>                 |
|          |                    | 216.0434         | -38.9       | -8.4        | 5.0  | C <sub>9</sub> H <sub>9</sub> O <sub>5</sub> F <sub>1</sub>   |
| 217.0478 | 26.0               | 217.0501         | -10.3       | -2.2        | 8.5  | C <sub>12</sub> H <sub>9</sub> O <sub>4</sub>                 |
|          |                    | 217.0454         | 11.5        | 2.5         | 13.5 | C <sub>16</sub> H <sub>6</sub> F <sub>1</sub>                 |
|          |                    | 217.0512         | -15.6       | -3.4        | 4.5  | C <sub>9</sub> H <sub>10</sub> O <sub>5</sub> F <sub>1</sub>  |
| 218.0483 | 3.8                | 218.0532         | -22.5       | -4.9        | 13.0 | C <sub>16</sub> H <sub>7</sub> F <sub>1</sub>                 |
|          |                    | 218.0579         | -44.2       | -9.6        | 8.0  | C <sub>12</sub> H <sub>10</sub> O <sub>4</sub>                |
|          |                    | 218.0379         | 47.5        | 10.4        | 9.0  | C <sub>12</sub> H <sub>7</sub> O <sub>3</sub> F <sub>1</sub>  |
| 219.0587 | 0.8                | 219.0610         | -10.5       | -2.3        | 12.5 | C <sub>16</sub> H <sub>8</sub> F <sub>1</sub>                 |
|          |                    | 219.0657         | -32.1       | -7.0        | 7.5  | C <sub>12</sub> H <sub>11</sub> O <sub>4</sub>                |
|          |                    | 219.0669         | -37.3       | -8.2        | 3.5  | C <sub>9</sub> H <sub>12</sub> O <sub>5</sub> F <sub>1</sub>  |
| 243.0795 | 1.8                | 243.0810         | -6.2        | -1.5        | 13.5 | C <sub>18</sub> H <sub>11</sub> O <sub>1</sub>                |
|          |                    | 243.0821         | -10.9       | -2.6        | 9.5  | C <sub>15</sub> H <sub>12</sub> O <sub>2</sub> F <sub>1</sub> |
| 279.1564 | 0.7                | 279.1549         | 5.3         | 1.5         | 10.5 | C <sub>20</sub> H <sub>20</sub> F <sub>1</sub>                |
|          |                    | 279.1596         | -11.6       | -3.2        | 5.5  | C <sub>16</sub> H <sub>23</sub> O <sub>4</sub>                |
|          |                    | 279.1608         | -15.7       | -4.4        | 1.5  | C <sub>13</sub> H <sub>24</sub> O <sub>5</sub> F <sub>1</sub> |
| 285.1333 | 0.7                | 285.1291         | 14.9        | 4.2         | 9.5  | C <sub>18</sub> H <sub>18</sub> O <sub>2</sub> F <sub>1</sub> |
|          |                    | 285.1279         | 18.9        | 5.4         | 13.5 | C <sub>21</sub> H <sub>17</sub> O <sub>1</sub>                |
| 326.0962 | 14.3               | 326.0954         | 2.4         | 0.8         | 12.0 | C <sub>19</sub> H <sub>15</sub> O <sub>4</sub> F <sub>1</sub> |
|          |                    | 326.0943         | 5.9         | 1.9         | 16.0 | C <sub>22</sub> H <sub>14</sub> O <sub>3</sub>                |
|          |                    | 326.1096         | -40.9       | -13.3       | 20.0 | C <sub>26</sub> H <sub>14</sub>                               |
| 327.1074 | 3.0                | 327.1033         | 12.6        | 4.1         | 11.5 | C <sub>19</sub> H <sub>16</sub> O <sub>4</sub> F <sub>1</sub> |
|          |                    | 327.1021         | 16.1        | 5.3         | 15.5 | C <sub>22</sub> H <sub>15</sub> O <sub>3</sub>                |
|          |                    | 327.1174         | -30.5       | -10.0       | 19.5 | C <sub>26</sub> H <sub>15</sub>                               |
| 328.1088 | 0.5                | 328.1099         | -3.4        | -1.1        | 15.0 | C <sub>22</sub> H <sub>16</sub> O <sub>3</sub>                |
|          |                    | 328.1111         | -6.9        | -2.3        | 11.0 | C <sub>19</sub> H <sub>17</sub> O <sub>4</sub> F <sub>1</sub> |
|          |                    | 328.1252         | -49.9       | -16.4       | 19.0 | C <sub>26</sub> H <sub>16</sub>                               |

# Compound # 14

| Mass     | Relative Intensity | Theoretical Mass | Delta [ppm] | Delta [mmu] | RDB  | Composition                                                   |
|----------|--------------------|------------------|-------------|-------------|------|---------------------------------------------------------------|
| 218.0570 | 2.4                | 218.0579         | -4.1        | -0.9        | 8.0  | C <sub>12</sub> H <sub>10</sub> O <sub>4</sub>                |
|          |                    | 218.0555         | 7.1         | 1.6         | 5.0  | C <sub>10</sub> H <sub>9</sub> O <sub>2</sub> F <sub>3</sub>  |
|          |                    | 218.0591         | -9.3        | -2.0        | 4.0  | C <sub>9</sub> H <sub>11</sub> O <sub>5</sub> F <sub>1</sub>  |
|          |                    | 218.0543         | 12.4        | 2.7         | 9.0  | C <sub>13</sub> H <sub>8</sub> O <sub>1</sub> F <sub>2</sub>  |
| 230.8785 | 10.3               |                  |             |             |      |                                                               |
| 235.9138 | 1.2                |                  |             |             |      |                                                               |
| 301.1058 | 1.8                | 301.1052         | 2.2         | 0.7         | 6.5  | C <sub>15</sub> H <sub>16</sub> O <sub>3</sub> F <sub>3</sub> |
|          |                    | 301.1076         | -6.0        | -1.8        | 9.5  | C <sub>17</sub> H <sub>17</sub> O <sub>5</sub>                |
|          |                    | 301.1040         | 6.0         | 1.8         | 10.5 | C <sub>18</sub> H <sub>15</sub> O <sub>2</sub> F <sub>2</sub> |
|          |                    | 301.1029         | 9.8         | 2.9         | 14.5 | C <sub>21</sub> H <sub>14</sub> O <sub>1</sub> F <sub>1</sub> |
| 357.0867 | 1.3                | 357.0891         | -6.8        | -2.4        | 17.5 | C <sub>24</sub> H <sub>12</sub> F <sub>3</sub>                |
|          |                    | 357.0916         | -13.6       | -4.9        | 20.5 | C <sub>26</sub> H <sub>13</sub> O <sub>2</sub>                |
|          |                    | 357.0927         | -16.8       | -6.0        | 16.5 | C <sub>23</sub> H <sub>14</sub> O <sub>3</sub> F <sub>1</sub> |
|          |                    | 357.0938         | -20.0       | -7.1        | 12.5 | C <sub>20</sub> H <sub>15</sub> O <sub>4</sub> F <sub>2</sub> |
|          |                    | 376.0911         | -0.3        | -0.1        | 16.0 | C <sub>23</sub> H <sub>14</sub> O <sub>3</sub> F <sub>2</sub> |
|          |                    | 376.0900         | 2.7         | 1.0         | 20.0 | C <sub>26</sub> H <sub>13</sub> O <sub>2</sub> F <sub>1</sub> |
|          |                    | 376.0922         | -3.3        | -1.3        | 12.0 | C <sub>20</sub> H <sub>15</sub> O <sub>4</sub> F <sub>3</sub> |
|          |                    | 376.0888         | 5.8         | 2.2         | 24.0 | C <sub>29</sub> H <sub>12</sub> O <sub>1</sub>                |
| 377.0939 | 1.5                | 377.0966         | -7.3        | -2.7        | 23.5 | C <sub>29</sub> H <sub>13</sub> O <sub>1</sub>                |
|          |                    | 377.0978         | -10.3       | -3.9        | 19.5 | C <sub>26</sub> H <sub>14</sub> O <sub>2</sub> F <sub>1</sub> |
|          |                    | 377.0989         | -13.4       | -5.0        | 15.5 | C <sub>23</sub> H <sub>15</sub> O <sub>3</sub> F <sub>2</sub> |
|          |                    | 377.1001         | -16.4       | -6.2        | 11.5 | C <sub>20</sub> H <sub>16</sub> O <sub>4</sub> F <sub>3</sub> |
|          |                    |                  |             |             |      |                                                               |

Compound # 15

| Mass     | Relative Intensity | Theoretical Mass | Delta [ppm] | Delta [mmu] | RDB  | Composition                                                   |
|----------|--------------------|------------------|-------------|-------------|------|---------------------------------------------------------------|
| 149.0268 | 100.0              | 149.0250         | 12.0        | 1.8         | 2.5  | C <sub>5</sub> H <sub>6</sub> O <sub>4</sub> F <sub>1</sub>   |
|          |                    | 149.0239         | 19.7        | 2.9         | 6.5  | C <sub>8</sub> H <sub>5</sub> O <sub>3</sub>                  |
| 150.0306 | 10.8               | 150.0317         | -7.3        | -1.1        | 6.0  | C <sub>8</sub> H <sub>6</sub> O <sub>3</sub>                  |
|          |                    | 150.0292         | 9.0         | 1.3         | 3.0  | C <sub>6</sub> H <sub>5</sub> O <sub>1</sub> F <sub>3</sub>   |
|          |                    | 150.0328         | -14.9       | -2.2        | 2.0  | C <sub>5</sub> H <sub>7</sub> O <sub>4</sub> F <sub>1</sub>   |
|          |                    | 150.0281         | 16.6        | 2.5         | 7.0  | C <sub>9</sub> H <sub>4</sub> F <sub>2</sub>                  |
| 151.0344 | 1.7                | 151.0359         | -10.3       | -1.6        | 6.5  | C <sub>9</sub> H <sub>5</sub> F <sub>2</sub>                  |
|          |                    | 151.0371         | -17.9       | -2.7        | 2.5  | C <sub>6</sub> H <sub>6</sub> O <sub>1</sub> F <sub>3</sub>   |
| 155.0755 | 1.1                |                  |             |             |      |                                                               |
| 159.0430 | 8.3                | 159.0422         | 5.3         | 0.8         | 4.5  | C <sub>8</sub> H <sub>6</sub> F <sub>3</sub>                  |
|          |                    | 159.0446         | -10.0       | -1.6        | 7.5  | C <sub>10</sub> H <sub>7</sub> O <sub>2</sub>                 |
|          |                    | 159.0457         | -17.2       | -2.7        | 3.5  | C <sub>7</sub> H <sub>8</sub> O <sub>3</sub> F <sub>1</sub>   |
| 160.0493 | 1.7                | 160.0500         | -4.6        | -0.7        | 4.0  | C <sub>8</sub> H <sub>7</sub> F <sub>3</sub>                  |
|          |                    | 160.0524         | -19.8       | -3.2        | 7.0  | C <sub>10</sub> H <sub>8</sub> O <sub>2</sub>                 |
| 167.0347 | 30.7               | 167.0344         | 1.4         | 0.2         | 5.5  | C <sub>8</sub> H <sub>7</sub> O <sub>4</sub>                  |
|          |                    | 167.0356         | -5.4        | -0.9        | 1.5  | C <sub>5</sub> H <sub>8</sub> O <sub>5</sub> F <sub>1</sub>   |
|          |                    | 167.0320         | 16.1        | 2.7         | 2.5  | C <sub>6</sub> H <sub>6</sub> O <sub>2</sub> F <sub>3</sub>   |
| 168.0379 | 2.9                | 168.0375         | 2.5         | 0.4         | 10.0 | C <sub>12</sub> H <sub>5</sub> F <sub>1</sub>                 |
|          |                    | 168.0387         | -4.3        | -0.7        | 6.0  | C <sub>9</sub> H <sub>6</sub> O <sub>1</sub> F <sub>2</sub>   |
|          |                    | 168.0398         | -11.1       | -1.9        | 2.0  | C <sub>6</sub> H <sub>7</sub> O <sub>2</sub> F <sub>3</sub>   |
| 171.0454 | 2.2                | 171.0457         | -1.9        | -0.3        | 4.5  | C <sub>8</sub> H <sub>8</sub> O <sub>3</sub> F <sub>1</sub>   |
|          |                    | 171.0446         | 4.8         | 0.8         | 8.5  | C <sub>11</sub> H <sub>7</sub> O <sub>2</sub>                 |
|          |                    | 171.0469         | -8.6        | -1.5        | 0.5  | C <sub>5</sub> H <sub>9</sub> O <sub>4</sub> F <sub>2</sub>   |
|          |                    | 171.0422         | 19.1        | 3.3         | 5.5  | C <sub>9</sub> H <sub>6</sub> F <sub>3</sub>                  |
| 172.0529 | 2.7                | 172.0524         | 2.5         | 0.4         | 8.0  | C <sub>11</sub> H <sub>8</sub> O <sub>2</sub>                 |
|          |                    | 172.0536         | -4.1        | -0.7        | 4.0  | C <sub>8</sub> H <sub>9</sub> O <sub>3</sub> F <sub>1</sub>   |
|          |                    | 172.0547         | -10.8       | -1.9        | 0.0  | C <sub>5</sub> H <sub>10</sub> O <sub>4</sub> F <sub>2</sub>  |
|          |                    | 172.0500         | 16.7        | 2.9         | 5.0  | C <sub>9</sub> H <sub>7</sub> F <sub>3</sub>                  |
| 173.0608 | 11.6               | 173.0603         | 3.0         | 0.5         | 7.5  | C <sub>11</sub> H <sub>9</sub> O <sub>2</sub>                 |
|          |                    | 173.0614         | -3.6        | -0.6        | 3.5  | C <sub>8</sub> H <sub>10</sub> O <sub>3</sub> F <sub>1</sub>  |
|          |                    | 173.0578         | 17.1        | 3.0         | 4.5  | C <sub>9</sub> H <sub>8</sub> F <sub>3</sub>                  |
| 174.0638 | 2.7                | 174.0656         | -10.8       | -1.9        | 4.0  | C <sub>9</sub> H <sub>9</sub> F <sub>3</sub>                  |
| 175.0433 | 1.5                | 175.0407         | 15.1        | 2.6         | 3.5  | C <sub>7</sub> H <sub>8</sub> O <sub>4</sub> F <sub>1</sub>   |
| 187.0403 | 3.0                | 187.0407         | -2.0        | -0.4        | 4.5  | C <sub>8</sub> H <sub>8</sub> O <sub>4</sub> F <sub>1</sub>   |
|          |                    | 187.0395         | 4.1         | 0.8         | 8.5  | C <sub>11</sub> H <sub>7</sub> O <sub>3</sub>                 |
|          |                    | 187.0418         | -8.2        | -1.5        | 0.5  | C <sub>5</sub> H <sub>9</sub> O <sub>5</sub> F <sub>2</sub>   |
|          |                    | 187.0371         | 17.1        | 3.2         | 5.5  | C <sub>9</sub> H <sub>6</sub> O <sub>1</sub> F <sub>3</sub>   |
| 189.0599 | 1.3                | 189.0563         | 19.1        | 3.6         | 3.5  | C <sub>8</sub> H <sub>10</sub> O <sub>4</sub> F <sub>1</sub>  |
| 199.0384 | 2.0                | 199.0395         | -5.6        | -1.1        | 9.5  | C <sub>12</sub> H <sub>9</sub> O <sub>3</sub>                 |
|          |                    | 199.0371         | 6.6         | 1.3         | 6.5  | C <sub>10</sub> H <sub>6</sub> O <sub>1</sub> F <sub>3</sub>  |
|          |                    | 199.0407         | -11.4       | -2.3        | 5.5  | C <sub>9</sub> H <sub>8</sub> O <sub>4</sub> F <sub>1</sub>   |
|          |                    | 199.0359         | 12.4        | 2.5         | 10.5 | C <sub>13</sub> H <sub>5</sub> F <sub>2</sub>                 |
| 201.0532 | 1.7                | 201.0527         | 2.3         | 0.5         | 5.5  | C <sub>10</sub> H <sub>8</sub> O <sub>1</sub> F <sub>3</sub>  |
|          |                    | 201.0516         | 8.0         | 1.6         | 9.5  | C <sub>13</sub> H <sub>7</sub> F <sub>2</sub>                 |
|          |                    | 201.0552         | -9.9        | -2.0        | 8.5  | C <sub>12</sub> H <sub>9</sub> O <sub>3</sub>                 |
|          |                    | 201.0563         | -15.5       | -3.1        | 4.5  | C <sub>9</sub> H <sub>10</sub> O <sub>4</sub> F <sub>1</sub>  |
| 217.0478 | 5.2                | 217.0476         | 0.8         | 0.2         | 5.5  | C <sub>10</sub> H <sub>8</sub> O <sub>2</sub> F <sub>3</sub>  |
|          |                    | 217.0465         | 6.1         | 1.3         | 9.5  | C <sub>13</sub> H <sub>7</sub> O <sub>1</sub> F <sub>2</sub>  |
|          |                    | 217.0501         | -10.5       | -2.3        | 8.5  | C <sub>12</sub> H <sub>9</sub> O <sub>4</sub>                 |
|          |                    | 217.0454         | 11.3        | 2.5         | 13.5 | C <sub>16</sub> H <sub>6</sub> F <sub>1</sub>                 |
| 218.0596 | 1.0                | 218.0591         | 2.5         | 0.5         | 4.0  | C <sub>9</sub> H <sub>11</sub> O <sub>5</sub> F <sub>1</sub>  |
|          |                    | 218.0579         | 7.7         | 1.7         | 8.0  | C <sub>12</sub> H <sub>10</sub> O <sub>4</sub>                |
|          |                    | 218.0555         | 18.9        | 4.1         | 5.0  | C <sub>10</sub> H <sub>9</sub> O <sub>2</sub> F <sub>3</sub>  |
| 279.1589 | 6.4                | 279.1596         | -2.5        | -0.7        | 5.5  | C <sub>16</sub> H <sub>23</sub> O <sub>4</sub>                |
|          |                    | 279.1572         | 6.2         | 1.7         | 2.5  | C <sub>14</sub> H <sub>22</sub> O <sub>2</sub> F <sub>3</sub> |
|          |                    | 279.1608         | -6.6        | -1.8        | 1.5  | C <sub>13</sub> H <sub>24</sub> O <sub>5</sub> F <sub>1</sub> |
|          |                    | 279.1560         | 10.3        | 2.9         | 6.5  | C <sub>17</sub> H <sub>21</sub> O <sub>1</sub> F <sub>2</sub> |
| 280.1631 | 1.4                | 280.1627         | 1.2         | 0.3         | 10.0 | C <sub>20</sub> H <sub>21</sub> F <sub>1</sub>                |
|          |                    | 280.1639         | -2.9        | -0.8        | 6.0  | C <sub>17</sub> H <sub>22</sub> O <sub>1</sub> F <sub>2</sub> |
|          |                    | 280.1650         | -7.0        | -2.0        | 2.0  | C <sub>14</sub> H <sub>23</sub> O <sub>2</sub> F <sub>3</sub> |
|          |                    | 280.1675         | -15.7       | -4.4        | 5.0  | C <sub>16</sub> H <sub>24</sub> O <sub>4</sub>                |
| 376.0931 | 5.2                | 376.0922         | 2.4         | 0.9         | 12.0 | C <sub>20</sub> H <sub>15</sub> O <sub>4</sub> F <sub>3</sub> |
|          |                    | 376.0911         | 5.4         | 2.0         | 16.0 | C <sub>23</sub> H <sub>14</sub> O <sub>3</sub> F <sub>2</sub> |
|          |                    | 376.0900         | 8.5         | 3.2         | 20.0 | C <sub>26</sub> H <sub>13</sub> O <sub>2</sub> F <sub>1</sub> |
|          |                    | 376.0888         | 11.5        | 4.3         | 24.0 | C <sub>29</sub> H <sub>12</sub> O <sub>1</sub>                |
| 377.0953 | 1.2                | 377.0966         | -3.6        | -1.3        | 23.5 | C <sub>29</sub> H <sub>13</sub> O <sub>1</sub>                |
|          |                    | 377.0978         | -6.6        | -2.5        | 19.5 | C <sub>26</sub> H <sub>14</sub> O <sub>2</sub> F <sub>1</sub> |
|          |                    | 377.0989         | -9.6        | -3.6        | 15.5 | C <sub>23</sub> H <sub>15</sub> O <sub>3</sub> F <sub>2</sub> |
|          |                    | 377.1001         | -12.7       | -4.8        | 11.5 | C <sub>20</sub> H <sub>16</sub> O <sub>4</sub> F <sub>3</sub> |

# Compound # 16

| Mass     | Relative Intensity | Theoretical Mass | Delta [ppm] | Delta [mmu] | RDB  | Composition                                    |
|----------|--------------------|------------------|-------------|-------------|------|------------------------------------------------|
| 217.0925 | 0.9                | 215.0497         | -97.1       | -20.9       | 13.5 | C <sub>16</sub> H <sub>7</sub> O <sub>1</sub>  |
|          |                    | 217.0865         | 27.9        | 6.1         | 7.5  | C <sub>13</sub> H <sub>13</sub> O <sub>3</sub> |
|          |                    | 217.1017         | -42.4       | -9.2        | 11.5 | C <sub>17</sub> H <sub>13</sub>                |
|          |                    | 218.0004         | -83.6       | -18.2       | 14.0 | C <sub>14</sub> H <sub>2</sub> O <sub>3</sub>  |
| 217.9822 | 3.8                |                  |             |             |      |                                                |
| 218.9070 | 1.6                |                  |             |             |      |                                                |
| 230.8678 | 2.1                |                  |             |             |      |                                                |
| 242.8927 | 1.3                |                  |             |             |      |                                                |
| 263.0661 | 1.0                | 263.0708         | -17.8       | -4.7        | 12.5 | C <sub>17</sub> H <sub>11</sub> O <sub>3</sub> |
|          |                    | 263.0497         | 62.5        | 16.4        | 17.5 | C <sub>20</sub> H <sub>7</sub> O <sub>1</sub>  |
|          |                    | 263.0861         | -75.8       | -19.9       | 16.5 | C <sub>21</sub> H <sub>11</sub>                |
|          |                    | 267.0082         | 12.5        | 3.3         | 17.5 | C <sub>18</sub> H <sub>3</sub> O <sub>3</sub>  |
| 267.0115 | 6.1                | 267.0235         | -44.7       | -11.9       | 21.5 | C <sub>22</sub> H <sub>3</sub>                 |
|          |                    | 268.0160         | -21.6       | -5.8        | 17.0 | C <sub>18</sub> H <sub>4</sub> O <sub>3</sub>  |
| 268.0103 | 1.4                | 267.9949         | 57.3        | 15.4        | 22.0 | C <sub>21</sub> O <sub>1</sub>                 |
|          |                    | 268.0313         | -78.5       | -21.0       | 21.0 | C <sub>22</sub> H <sub>4</sub>                 |
| 268.8420 | 0.6                |                  |             |             |      |                                                |
| 279.1399 | 6.1                | 279.1385         | 4.8         | 1.4         | 10.5 | C <sub>19</sub> H <sub>19</sub> O <sub>2</sub> |
|          |                    | 279.1596         | -70.8       | -19.8       | 5.5  | C <sub>16</sub> H <sub>23</sub> O <sub>4</sub> |
|          |                    | 279.1174         | 80.5        | 22.5        | 15.5 | C <sub>22</sub> H <sub>15</sub>                |
|          |                    | 280.1675         | -36.3       | -10.2       | 5.0  | C <sub>16</sub> H <sub>24</sub> O <sub>4</sub> |
| 280.1573 | 1.2                | 280.1463         | 39.2        | 11.0        | 10.0 | C <sub>19</sub> H <sub>20</sub> O <sub>2</sub> |
|          |                    | 280.1827         | -90.7       | -25.4       | 9.0  | C <sub>20</sub> H <sub>24</sub> O <sub>1</sub> |
| 350.1520 | 2.5                | 350.1518         | 0.5         | 0.2         | 12.0 | C <sub>22</sub> H <sub>22</sub> O <sub>4</sub> |
|          |                    | 350.1671         | -43.1       | -15.1       | 16.0 | C <sub>26</sub> H <sub>22</sub> O <sub>1</sub> |
|          |                    | 350.1307         | 60.8        | 21.3        | 17.0 | C <sub>25</sub> H <sub>18</sub> O <sub>2</sub> |
|          |                    | 351.1596         | -1.8        | -0.6        | 11.5 | C <sub>22</sub> H <sub>23</sub> O <sub>4</sub> |
| 351.1590 | 0.7                | 351.1749         | -45.2       | -15.9       | 15.5 | C <sub>26</sub> H <sub>23</sub> O <sub>1</sub> |
|          |                    | 351.1385         | 58.4        | 20.5        | 16.5 | C <sub>25</sub> H <sub>19</sub> O <sub>2</sub> |

Compound # 17

| Mass     | Relative Intensity | Theoretical Mass | Delta [ppm] | Delta [mmu] | RDB  | Composition                                    |
|----------|--------------------|------------------|-------------|-------------|------|------------------------------------------------|
| 203.0712 | 1.3                | 203.0708         | 1.8         | 0.4         | 7.5  | C <sub>12</sub> H <sub>11</sub> O <sub>3</sub> |
|          |                    | 203.0861         | -73.3       | -14.9       | 11.5 | C <sub>16</sub> H <sub>11</sub>                |
|          |                    | 203.0556         | 77.0        | 15.6        | 3.5  | C <sub>8</sub> H <sub>11</sub> O <sub>6</sub>  |
| 216.0432 | 3.9                | 216.0423         | 4.4         | 1.0         | 9.0  | C <sub>12</sub> H <sub>8</sub> O <sub>4</sub>  |
|          |                    | 216.0575         | -66.2       | -14.3       | 13.0 | C <sub>16</sub> H <sub>8</sub> O <sub>1</sub>  |
|          |                    | 216.0270         | 75.0        | 16.2        | 5.0  | C <sub>8</sub> H <sub>8</sub> O <sub>7</sub>   |
| 217.0494 | 89.1               | 217.0501         | -3.3        | -0.7        | 8.5  | C <sub>12</sub> H <sub>9</sub> O <sub>4</sub>  |
|          |                    | 217.0348         | 67.0        | 14.5        | 4.5  | C <sub>8</sub> H <sub>9</sub> O <sub>7</sub>   |
|          |                    | 217.0653         | -73.6       | -16.0       | 12.5 | C <sub>16</sub> H <sub>9</sub> O <sub>1</sub>  |
| 218.0525 | 11.7               | 218.0579         | -24.9       | -5.4        | 8.0  | C <sub>12</sub> H <sub>10</sub> O <sub>4</sub> |
|          |                    | 218.0427         | 45.1        | 9.8         | 4.0  | C <sub>8</sub> H <sub>10</sub> O <sub>7</sub>  |
|          |                    | 218.0368         | 72.0        | 15.7        | 13.0 | C <sub>15</sub> H <sub>6</sub> O <sub>2</sub>  |
| 219.0606 | 2.5                | 219.0657         | -23.3       | -5.1        | 7.5  | C <sub>12</sub> H <sub>11</sub> O <sub>4</sub> |
|          |                    | 219.0505         | 46.3        | 10.2        | 3.5  | C <sub>8</sub> H <sub>11</sub> O <sub>7</sub>  |
|          |                    | 219.0446         | 73.2        | 16.0        | 12.5 | C <sub>15</sub> H <sub>7</sub> O <sub>2</sub>  |
| 225.0895 | 1.6                | 225.0916         | -9.1        | -2.0        | 9.5  | C <sub>15</sub> H <sub>13</sub> O <sub>2</sub> |
|          |                    | 225.0974         | -35.2       | -7.9        | 0.5  | C <sub>8</sub> H <sub>17</sub> O <sub>7</sub>  |
|          |                    | 225.0763         | 58.7        | 13.2        | 5.5  | C <sub>11</sub> H <sub>13</sub> O <sub>5</sub> |
| 255.1011 | 27.3               | 255.1021         | -3.8        | -1.0        | 9.5  | C <sub>16</sub> H <sub>15</sub> O <sub>3</sub> |
|          |                    | 255.0869         | 56.0        | 14.3        | 5.5  | C <sub>12</sub> H <sub>15</sub> O <sub>6</sub> |
|          |                    | 255.1174         | -63.6       | -16.2       | 13.5 | C <sub>20</sub> H <sub>15</sub>                |
| 256.1072 | 4.5                | 256.1099         | -10.8       | -2.8        | 9.0  | C <sub>16</sub> H <sub>16</sub> O <sub>3</sub> |
|          |                    | 256.0947         | 48.7        | 12.5        | 5.0  | C <sub>12</sub> H <sub>16</sub> O <sub>6</sub> |
|          |                    | 256.1252         | -70.4       | -18.0       | 13.0 | C <sub>20</sub> H <sub>16</sub>                |
| 338.1148 | 37.3               | 338.1154         | -1.9        | -0.6        | 12.0 | C <sub>20</sub> H <sub>18</sub> O <sub>5</sub> |
|          |                    | 338.1096         | 15.5        | 5.2         | 21.0 | C <sub>27</sub> H <sub>14</sub>                |
|          |                    | 338.1307         | -47.0       | -15.9       | 16.0 | C <sub>24</sub> H <sub>18</sub> O <sub>2</sub> |
| 339.1203 | 7.6                | 339.1174         | 8.6         | 2.9         | 20.5 | C <sub>27</sub> H <sub>15</sub>                |
|          |                    | 339.1232         | -8.7        | -3.0        | 11.5 | C <sub>20</sub> H <sub>19</sub> O <sub>5</sub> |
|          |                    | 339.1021         | 53.6        | 18.2        | 16.5 | C <sub>23</sub> H <sub>15</sub> O <sub>3</sub> |
| 340.1221 | 1.5                | 340.1252         | -9.2        | -3.1        | 20.0 | C <sub>27</sub> H <sub>16</sub>                |
|          |                    | 340.1311         | -26.5       | -9.0        | 11.0 | C <sub>20</sub> H <sub>20</sub> O <sub>5</sub> |
|          |                    | 340.1099         | 35.7        | 12.1        | 16.0 | C <sub>23</sub> H <sub>16</sub> O <sub>3</sub> |

Compound # 18

| Mass     | Relative Intensity | Theoretical Mass | Delta [ppm] | Delta [mmu] | RDB  | Composition                                    |
|----------|--------------------|------------------|-------------|-------------|------|------------------------------------------------|
| 151.0661 | 2.7                | 151.0606         | 36.2        | 5.5         | 0.5  | C <sub>5</sub> H <sub>11</sub> O <sub>5</sub>  |
|          |                    | 151.0759         | -64.8       | -9.8        | 4.5  | C <sub>9</sub> H <sub>11</sub> O <sub>2</sub>  |
|          |                    | 151.0548         | 75.1        | 11.3        | 9.5  | C <sub>12</sub> H <sub>7</sub>                 |
| 152.0469 | 19.3               | 152.0473         | -3.2        | -0.5        | 5.0  | C <sub>8</sub> H <sub>8</sub> O <sub>3</sub>   |
|          |                    | 152.0321         | 97.1        | 14.8        | 1.0  | C <sub>4</sub> H <sub>8</sub> O <sub>6</sub>   |
| 153.0506 | 1.9                | 153.0552         | -29.8       | -4.6        | 4.5  | C <sub>6</sub> H <sub>9</sub> O <sub>3</sub>   |
|          |                    | 153.0399         | 69.8        | 10.7        | 0.5  | C <sub>4</sub> H <sub>9</sub> O <sub>6</sub>   |
| 159.0455 | 4.2                | 159.0446         | 5.5         | 0.9         | 7.5  | C <sub>10</sub> H <sub>7</sub> O <sub>2</sub>  |
| 160.0518 | 1.1                | 160.0524         | -3.8        | -0.6        | 7.0  | C <sub>10</sub> H <sub>8</sub> O <sub>2</sub>  |
|          |                    | 160.0372         | 91.6        | 14.7        | 3.0  | C <sub>6</sub> H <sub>8</sub> O <sub>5</sub>   |
| 164.0487 | 1.1                | 164.0473         | 8.2         | 1.3         | 6.0  | C <sub>9</sub> H <sub>8</sub> O <sub>3</sub>   |
|          |                    | 164.0626         | -84.8       | -13.9       | 10.0 | C <sub>13</sub> H <sub>8</sub>                 |
| 171.0453 | 17.7               | 171.0446         | 4.1         | 0.7         | 8.5  | C <sub>11</sub> H <sub>7</sub> O <sub>2</sub>  |
|          |                    | 171.0293         | 93.3        | 16.0        | 4.5  | C <sub>7</sub> H <sub>7</sub> O <sub>5</sub>   |
| 172.0525 | 54.3               | 172.0524         | 0.2         | 0.0         | 8.0  | C <sub>11</sub> H <sub>8</sub> O <sub>2</sub>  |
|          |                    | 172.0372         | 88.8        | 15.3        | 4.0  | C <sub>7</sub> H <sub>8</sub> O <sub>5</sub>   |
| 173.0601 | 29.7               | 173.0603         | -0.7        | -0.1        | 7.5  | C <sub>11</sub> H <sub>9</sub> O <sub>2</sub>  |
|          |                    | 173.0450         | 87.5        | 15.1        | 3.5  | C <sub>7</sub> H <sub>9</sub> O <sub>5</sub>   |
| 174.0658 | 5.2                | 174.0681         | -12.9       | -2.3        | 7.0  | C <sub>11</sub> H <sub>10</sub> O <sub>2</sub> |
|          |                    | 174.0528         | 74.7        | 13.0        | 3.0  | C <sub>7</sub> H <sub>10</sub> O <sub>5</sub>  |
| 185.0596 | 1.2                | 185.0603         | -3.7        | -0.7        | 8.5  | C <sub>12</sub> H <sub>9</sub> O <sub>2</sub>  |
|          |                    | 185.0450         | 78.8        | 14.6        | 4.5  | C <sub>8</sub> H <sub>9</sub> O <sub>5</sub>   |
| 187.0644 | 1.1                | 187.0606         | 19.9        | 3.7         | 3.5  | C <sub>8</sub> H <sub>11</sub> O <sub>5</sub>  |
|          |                    | 187.0548         | 51.3        | 9.6         | 12.5 | C <sub>15</sub> H <sub>7</sub>                 |
|          |                    | 187.0759         | -61.6       | -11.5       | 7.5  | C <sub>12</sub> H <sub>11</sub> O <sub>2</sub> |
| 189.0703 | 1.1                | 189.0704         | -0.6        | -0.1        | 11.5 | C <sub>15</sub> H <sub>9</sub>                 |
|          |                    | 189.0763         | -31.6       | -6.0        | 2.5  | C <sub>8</sub> H <sub>13</sub> O <sub>5</sub>  |
|          |                    | 189.0552         | 80.1        | 15.1        | 7.5  | C <sub>11</sub> H <sub>9</sub> O <sub>3</sub>  |
| 199.0427 | 1.8                | 199.0395         | 15.8        | 3.2         | 9.5  | C <sub>12</sub> H <sub>7</sub> O <sub>3</sub>  |
|          |                    | 199.0548         | -60.8       | -12.1       | 13.5 | C <sub>16</sub> H <sub>7</sub>                 |
|          |                    | 199.0606         | -90.3       | -18.0       | 4.5  | C <sub>9</sub> H <sub>11</sub> O <sub>5</sub>  |
| 200.0477 | 9.8                | 200.0473         | 1.8         | 0.4         | 9.0  | C <sub>12</sub> H <sub>8</sub> O <sub>3</sub>  |
|          |                    | 200.0626         | -74.5       | -14.9       | 13.0 | C <sub>16</sub> H <sub>8</sub>                 |
|          |                    | 200.0321         | 78.1        | 15.6        | 5.0  | C <sub>8</sub> H <sub>8</sub> O <sub>6</sub>   |
| 201.0538 | 66.5               | 201.0552         | -6.8        | -1.4        | 8.5  | C <sub>12</sub> H <sub>9</sub> O <sub>3</sub>  |
|          |                    | 201.0399         | 69.1        | 13.9        | 4.5  | C <sub>8</sub> H <sub>9</sub> O <sub>6</sub>   |
|          |                    | 201.0704         | -82.7       | -16.6       | 12.5 | C <sub>16</sub> H <sub>9</sub>                 |
| 202.0594 | 9.5                | 202.0630         | -17.6       | -3.5        | 8.0  | C <sub>12</sub> H <sub>10</sub> O <sub>3</sub> |
|          |                    | 202.0477         | 57.9        | 11.7        | 4.0  | C <sub>8</sub> H <sub>10</sub> O <sub>6</sub>  |
|          |                    | 202.0419         | 87.0        | 17.6        | 13.0 | C <sub>15</sub> H <sub>6</sub> O <sub>1</sub>  |
| 203.0651 | 1.4                | 203.0708         | -28.0       | -5.7        | 7.5  | C <sub>12</sub> H <sub>11</sub> O <sub>3</sub> |
|          |                    | 203.0556         | 47.1        | 9.6         | 3.5  | C <sub>8</sub> H <sub>11</sub> O <sub>6</sub>  |
|          |                    | 203.0497         | 76.0        | 15.4        | 12.5 | C <sub>15</sub> H <sub>7</sub> O <sub>1</sub>  |
| 213.0549 | 1.2                | 213.0552         | -1.0        | -0.2        | 9.5  | C <sub>13</sub> H <sub>9</sub> O <sub>3</sub>  |
|          |                    | 213.0399         | 70.6        | 15.0        | 5.5  | C <sub>9</sub> H <sub>9</sub> O <sub>6</sub>   |
|          |                    | 213.0704         | -72.6       | -15.5       | 13.5 | C <sub>17</sub> H <sub>9</sub>                 |
| 214.0633 | 2.7                | 214.0630         | 1.7         | 0.4         | 9.0  | C <sub>13</sub> H <sub>10</sub> O <sub>3</sub> |
|          |                    | 214.0783         | -69.6       | -14.9       | 13.0 | C <sub>17</sub> H <sub>10</sub>                |
|          |                    | 214.0477         | 72.9        | 15.6        | 5.0  | C <sub>9</sub> H <sub>10</sub> O <sub>6</sub>  |
| 216.0653 | 2.1                | 216.0634         | 8.9         | 1.9         | 4.0  | C <sub>9</sub> H <sub>12</sub> O <sub>6</sub>  |
|          |                    | 216.0575         | 36.1        | 7.8         | 13.0 | C <sub>16</sub> H <sub>8</sub> O <sub>1</sub>  |
|          |                    | 216.0786         | -61.7       | -13.3       | 8.0  | C <sub>13</sub> H <sub>12</sub> O <sub>3</sub> |
| 217.0506 | 1.3                | 217.0501         | 2.4         | 0.5         | 8.5  | C <sub>12</sub> H <sub>9</sub> O <sub>4</sub>  |
|          |                    | 217.0653         | -67.8       | -14.7       | 12.5 | C <sub>16</sub> H <sub>9</sub> O <sub>1</sub>  |
|          |                    | 217.0348         | 72.7        | 15.8        | 4.5  | C <sub>8</sub> H <sub>9</sub> O <sub>7</sub>   |
| 218.0592 | 3.0                | 218.0579         | 5.9         | 1.3         | 8.0  | C <sub>12</sub> H <sub>10</sub> O <sub>4</sub> |
|          |                    | 218.0732         | -64.1       | -14.0       | 12.0 | C <sub>16</sub> H <sub>10</sub> O <sub>1</sub> |
|          |                    | 218.0427         | 75.8        | 16.5        | 4.0  | C <sub>8</sub> H <sub>10</sub> O <sub>7</sub>  |
| 285.1367 | 1.5                | 285.1338         | 10.0        | 2.9         | 4.5  | C <sub>14</sub> H <sub>21</sub> O <sub>6</sub> |
|          |                    | 285.1279         | 30.6        | 8.7         | 13.5 | C <sub>21</sub> H <sub>17</sub> O <sub>1</sub> |
|          |                    | 285.1491         | -43.5       | -12.4       | 8.5  | C <sub>18</sub> H <sub>21</sub> O <sub>3</sub> |
| 320.1062 | 2.6                | 320.1049         | 4.3         | 1.4         | 13.0 | C <sub>20</sub> H <sub>16</sub> O <sub>4</sub> |
|          |                    | 320.1201         | -43.4       | -13.9       | 17.0 | C <sub>24</sub> H <sub>16</sub> O <sub>1</sub> |
|          |                    | 320.0896         | 52.0        | 16.6        | 9.0  | C <sub>16</sub> H <sub>16</sub> O <sub>7</sub> |
| 366.1093 | 21.4               | 366.1103         | -2.8        | -1.0        | 13.0 | C <sub>21</sub> H <sub>18</sub> O <sub>6</sub> |
|          |                    | 366.1045         | 13.3        | 4.9         | 22.0 | C <sub>28</sub> H <sub>14</sub> O <sub>1</sub> |
|          |                    | 366.1256         | -44.5       | -16.3       | 17.0 | C <sub>25</sub> H <sub>18</sub> O <sub>3</sub> |
| 367.1133 | 4.8                | 367.1123         | 2.7         | 1.0         | 21.5 | C <sub>28</sub> H <sub>15</sub> O <sub>1</sub> |
|          |                    | 367.1182         | -13.3       | -4.9        | 12.5 | C <sub>21</sub> H <sub>19</sub> O <sub>6</sub> |
|          |                    | 367.0970         | 44.3        | 16.2        | 17.5 | C <sub>24</sub> H <sub>15</sub> O <sub>4</sub> |

Compound # 19

| Mass     | Relative Intensity | Theoretical Mass | Delta [ppm] | Delta [mmu] | RDB  | Composition                                                   |
|----------|--------------------|------------------|-------------|-------------|------|---------------------------------------------------------------|
| 218.0552 | 1.1                | 218.0532         | 9.4         | 2.1         | 13.0 | C <sub>16</sub> H <sub>7</sub> F <sub>1</sub>                 |
|          |                    | 218.0579         | -12.2       | -2.7        | 8.0  | C <sub>12</sub> H <sub>10</sub> O <sub>4</sub>                |
|          |                    | 218.0591         | -17.5       | -3.8        | 4.0  | C <sub>9</sub> H <sub>11</sub> O <sub>5</sub> F <sub>1</sub>  |
|          |                    | 218.0427         | 57.7        | 12.6        | 4.0  | C <sub>8</sub> H <sub>10</sub> O <sub>7</sub>                 |
|          |                    | 338.0999         | 0.6         | 338.0954    | 13.3 | 4.5                                                           |
| 384.1007 | 11.2               | 338.0943         | 16.7        | 5.7         | 17.0 | C <sub>23</sub> H <sub>14</sub> O <sub>3</sub>                |
|          |                    | 338.1096         | -28.4       | -9.6        | 21.0 | C <sub>27</sub> H <sub>14</sub>                               |
|          |                    | 338.1107         | -31.8       | -10.7       | 17.0 | C <sub>24</sub> H <sub>15</sub> O <sub>1</sub> F <sub>1</sub> |
|          |                    | 384.1009         | -0.7        | -0.3        | 13.0 | C <sub>21</sub> H <sub>17</sub> O <sub>6</sub> F <sub>1</sub> |
|          |                    | 384.0998         | 2.3         | 0.9         | 17.0 | C <sub>24</sub> H <sub>16</sub> O <sub>5</sub>                |
|          |                    | 384.0950         | 14.6        | 5.6         | 22.0 | C <sub>28</sub> H <sub>13</sub> O <sub>1</sub> F <sub>1</sub> |
|          |                    | 384.0939         | 17.6        | 6.8         | 26.0 | C <sub>31</sub> H <sub>12</sub>                               |
|          |                    | 385.1029         | 3.9         | 1.5         | 21.5 | C <sub>28</sub> H <sub>14</sub> O <sub>1</sub> F <sub>1</sub> |
|          |                    | 385.1017         | 6.8         | 2.6         | 25.5 | C <sub>31</sub> H <sub>13</sub>                               |
|          |                    | 385.1076         | -8.4        | -3.2        | 16.5 | C <sub>24</sub> H <sub>17</sub> O <sub>5</sub>                |
| 385.1044 | 2.5                | 385.1087         | -11.4       | -4.4        | 12.5 | C <sub>21</sub> H <sub>18</sub> O <sub>6</sub> F <sub>1</sub> |

# Compound # 20

| Mass     | Relative Intensity | Theoretical Mass | Delta [ppm] | Delta [mmu] | RDB  | Composition                                    |
|----------|--------------------|------------------|-------------|-------------|------|------------------------------------------------|
| 201.0482 | 10.3               | 201.0552         | -34.5       | -6.9        | 8.5  | C <sub>12</sub> H <sub>9</sub> O <sub>3</sub>  |
|          |                    | 201.0399         | 41.4        | 8.3         | 4.5  | C <sub>8</sub> H <sub>9</sub> O <sub>6</sub>   |
|          |                    | 201.0340         | 70.6        | 14.2        | 13.5 | C <sub>15</sub> H <sub>5</sub> O <sub>1</sub>  |
| 202.0558 | 1.7                | 202.0630         | -35.6       | -7.2        | 8.0  | C <sub>12</sub> H <sub>10</sub> O <sub>3</sub> |
|          |                    | 202.0477         | 39.9        | 8.1         | 4.0  | C <sub>8</sub> H <sub>10</sub> O <sub>6</sub>  |
|          |                    | 202.0419         | 69.0        | 13.9        | 13.0 | C <sub>15</sub> H <sub>6</sub> O <sub>1</sub>  |
| 350.1150 | 6.4                | 350.1154         | -1.2        | -0.4        | 13.0 | C <sub>21</sub> H <sub>18</sub> O <sub>5</sub> |
|          |                    | 350.1096         | 15.6        | 5.5         | 22.0 | C <sub>28</sub> H <sub>14</sub>                |
|          |                    | 350.1307         | -44.7       | -15.7       | 17.0 | C <sub>25</sub> H <sub>18</sub> O <sub>2</sub> |
| 351.1143 | 1.0                | 351.1174         | -8.7        | -3.1        | 21.5 | C <sub>28</sub> H <sub>15</sub>                |
|          |                    | 351.1232         | -25.4       | -8.9        | 12.5 | C <sub>21</sub> H <sub>19</sub> O <sub>5</sub> |
|          |                    | 351.1021         | 34.7        | 12.2        | 17.5 | C <sub>24</sub> H <sub>15</sub> O <sub>3</sub> |

# Compound # 21

| Mass     | Relative Intensity | Theoretical Mass | Delta [ppm] | Delta [mmu] | RDB  | Composition                                                   |                                                |
|----------|--------------------|------------------|-------------|-------------|------|---------------------------------------------------------------|------------------------------------------------|
| 357.0522 | 1.2                | 357.0527         | -1.5        | -0.5        | 18.5 | C <sub>23</sub> H <sub>9</sub> O <sub>1</sub> F <sub>3</sub>  |                                                |
|          |                    | 357.0516         | 1.7         | 0.6         | 22.5 | C <sub>26</sub> H <sub>7</sub> F <sub>2</sub>                 |                                                |
|          |                    | 357.0552         | -8.3        | -3.0        | 21.5 | C <sub>25</sub> H <sub>9</sub> O <sub>3</sub>                 |                                                |
|          |                    | 357.0563         | -11.5       | -4.1        | 17.5 | C <sub>22</sub> H <sub>10</sub> O <sub>4</sub> F <sub>1</sub> |                                                |
|          |                    | 357.0575         | -14.7       | -5.3        | 13.5 | C <sub>19</sub> H <sub>11</sub> O <sub>5</sub> F <sub>2</sub> |                                                |
| 359.0434 | 7.6                | 359.0497         | -17.5       | -6.3        | 25.5 | C <sub>28</sub> H <sub>7</sub> O <sub>1</sub>                 |                                                |
|          |                    | 359.0508         | -20.7       | -7.4        | 21.5 | C <sub>25</sub> H <sub>8</sub> O <sub>2</sub> F <sub>1</sub>  |                                                |
|          |                    | 359.0356         | 21.8        | 7.8         | 17.5 | C <sub>21</sub> H <sub>8</sub> O <sub>5</sub> F <sub>1</sub>  |                                                |
|          |                    | 359.0520         | -23.9       | -8.6        | 17.5 | C <sub>22</sub> H <sub>9</sub> O <sub>3</sub> F <sub>2</sub>  |                                                |
|          |                    | 359.0344         | 25.0        | 9.0         | 21.5 | C <sub>24</sub> H <sub>7</sub> O <sub>4</sub>                 |                                                |
|          |                    | 360.0434         | 16.7        | 6.0         | 17.0 | C <sub>21</sub> H <sub>9</sub> O <sub>5</sub> F <sub>1</sub>  |                                                |
|          |                    | 360.0423         | 19.8        | 7.1         | 21.0 | C <sub>24</sub> H <sub>8</sub> O <sub>4</sub>                 |                                                |
| 360.0494 | 1.9                | 360.0575         | -22.5       | -8.1        | 25.0 | C <sub>28</sub> H <sub>8</sub> O <sub>1</sub>                 |                                                |
|          |                    | 360.0587         | -25.7       | -9.3        | 21.0 | C <sub>25</sub> H <sub>9</sub> O <sub>2</sub> F <sub>1</sub>  |                                                |
|          |                    | 360.0398         | 26.6        | 9.6         | 18.0 | C <sub>22</sub> H <sub>7</sub> O <sub>2</sub> F <sub>3</sub>  |                                                |
|          |                    | 385.0816         | 1.1         | -3.4        | -1.3 | 22.5                                                          | C <sub>28</sub> H <sub>11</sub> F <sub>2</sub> |
|          |                    | 385.0840         | -6.4        | -2.5        | 18.5 | C <sub>25</sub> H <sub>12</sub> O <sub>1</sub> F <sub>3</sub> |                                                |
|          |                    | 385.0865         | -12.7       | -4.9        | 21.5 | C <sub>27</sub> H <sub>13</sub> O <sub>3</sub>                |                                                |
|          |                    | 385.0876         | -15.7       | -6.0        | 17.5 | C <sub>24</sub> H <sub>14</sub> O <sub>4</sub> F <sub>1</sub> |                                                |
| 404.0866 | 6.7                | 385.0888         | -18.7       | -7.2        | 13.5 | C <sub>21</sub> H <sub>15</sub> O <sub>5</sub> F <sub>2</sub> |                                                |
|          |                    | 404.0872         | -1.3        | -0.5        | 13.0 | C <sub>21</sub> H <sub>15</sub> O <sub>5</sub> F <sub>3</sub> |                                                |
|          |                    | 404.0860         | 1.6         | 0.6         | 17.0 | C <sub>24</sub> H <sub>14</sub> O <sub>4</sub> F <sub>2</sub> |                                                |
|          |                    | 404.0849         | 4.4         | 1.8         | 21.0 | C <sub>27</sub> H <sub>13</sub> O <sub>3</sub> F <sub>1</sub> |                                                |
|          |                    | 404.0837         | 7.2         | 2.9         | 25.0 | C <sub>30</sub> H <sub>12</sub> O <sub>2</sub>                |                                                |
|          |                    | 404.0813         | 13.3        | 5.4         | 22.0 | C <sub>28</sub> H <sub>11</sub> F <sub>3</sub>                |                                                |
|          |                    | 405.0868         | 1.6         | -5.6        | -2.3 | 21.5                                                          | C <sub>28</sub> H <sub>12</sub> F <sub>3</sub> |
| 405.0888 | 1.6                | 405.0891         | -5.6        | -2.3        | 21.5 | C <sub>28</sub> H <sub>12</sub> F <sub>3</sub>                |                                                |
|          |                    | 405.0916         | -11.6       | -4.7        | 24.5 | C <sub>30</sub> H <sub>13</sub> O <sub>2</sub>                |                                                |
|          |                    | 405.0927         | -14.5       | -5.9        | 20.5 | C <sub>27</sub> H <sub>14</sub> O <sub>3</sub> F <sub>1</sub> |                                                |
|          |                    | 405.0938         | -17.3       | -7.0        | 16.5 | C <sub>24</sub> H <sub>15</sub> O <sub>4</sub> F <sub>2</sub> |                                                |
|          |                    | 405.0950         | -20.1       | -8.1        | 12.5 | C <sub>21</sub> H <sub>16</sub> O <sub>5</sub> F <sub>3</sub> |                                                |

# Compound #22

| Mass     | Relative Intensity | Theoretical Mass | Delta [ppm] | Delta [mmu] | RDB  | Composition                                                    |
|----------|--------------------|------------------|-------------|-------------|------|----------------------------------------------------------------|
| 173.0601 | 13.0               | 173.0603         | -1.0        | -0.2        | 7.5  | C <sub>11</sub> H <sub>9</sub> O <sub>2</sub>                  |
|          |                    | 173.0733         | -76.5       | -13.2       | 2.5  | C <sub>9</sub> H <sub>14</sub> O <sub>1</sub> Cl <sub>1</sub>  |
|          |                    | 173.0450         | 87.2        | 15.1        | 3.5  | C <sub>7</sub> H <sub>9</sub> O <sub>5</sub>                   |
| 174.0658 | 1.8                | 174.0681         | -12.8       | -2.2        | 7.0  | C <sub>11</sub> H <sub>10</sub> O <sub>2</sub>                 |
|          |                    | 174.0528         | 74.8        | 13.0        | 3.0  | C <sub>7</sub> H <sub>10</sub> O <sub>5</sub>                  |
|          |                    | 174.0811         | -87.9       | -15.3       | 2.0  | C <sub>9</sub> H <sub>15</sub> O <sub>1</sub> Cl <sub>1</sub>  |
| 200.0518 | 3.0                | 200.0473         | 22.1        | 4.4         | 9.0  | C <sub>12</sub> H <sub>8</sub> O <sub>3</sub>                  |
|          |                    | 200.0452         | 33.1        | 6.6         | 0.0  | C <sub>6</sub> H <sub>13</sub> O <sub>5</sub> Cl <sub>1</sub>  |
|          |                    | 200.0604         | -43.2       | -8.6        | 4.0  | C <sub>10</sub> H <sub>13</sub> O <sub>2</sub> Cl <sub>1</sub> |
| 201.0551 | 18.9               | 200.0626         | -54.2       | -10.8       | 13.0 | C <sub>16</sub> H <sub>8</sub>                                 |
|          |                    | 201.0552         | -0.2        | -0.0        | 8.5  | C <sub>12</sub> H <sub>9</sub> O <sub>3</sub>                  |
|          |                    | 201.0471         | 39.9        | 8.0         | 8.5  | C <sub>13</sub> H <sub>10</sub> Cl <sub>1</sub>                |
| 202.0586 | 2.5                | 201.0682         | -65.2       | -13.1       | 3.5  | C <sub>10</sub> H <sub>14</sub> O <sub>2</sub> Cl <sub>1</sub> |
|          |                    | 201.0399         | 75.6        | 15.2        | 4.5  | C <sub>9</sub> H <sub>9</sub> O <sub>6</sub>                   |
|          |                    | 202.0549         | 18.0        | 3.6         | 8.0  | C <sub>13</sub> H <sub>11</sub> Cl <sub>1</sub>                |
| 216.0717 | 1.0                | 202.0630         | -21.9       | -4.4        | 8.0  | C <sub>12</sub> H <sub>10</sub> O <sub>3</sub>                 |
|          |                    | 202.0477         | 53.6        | 10.8        | 4.0  | C <sub>9</sub> H <sub>10</sub> O <sub>6</sub>                  |
|          |                    | 202.0419         | 82.7        | 16.7        | 13.0 | C <sub>15</sub> H <sub>6</sub> O <sub>1</sub>                  |
| 370.0596 | 6.3                | 216.0706         | 5.4         | 1.2         | 8.0  | C <sub>14</sub> H <sub>13</sub> Cl <sub>1</sub>                |
|          |                    | 216.0786         | -32.0       | -6.9        | 8.0  | C <sub>13</sub> H <sub>12</sub> O <sub>3</sub>                 |
|          |                    | 216.0634         | 38.6        | 8.3         | 4.0  | C <sub>9</sub> H <sub>12</sub> O <sub>6</sub>                  |
| 371.0629 | 1.3                | 216.0575         | 65.8        | 14.2        | 13.0 | C <sub>16</sub> H <sub>9</sub> O <sub>1</sub>                  |
|          |                    | 370.0608         | -3.2        | -1.2        | 13.0 | C <sub>20</sub> H <sub>15</sub> O <sub>5</sub> Cl <sub>1</sub> |
|          |                    | 370.0630         | -9.1        | -3.4        | 22.0 | C <sub>26</sub> H <sub>10</sub> O <sub>3</sub>                 |
| 371.0629 | 1.3                | 370.0549         | 12.7        | 4.7         | 22.0 | C <sub>27</sub> H <sub>11</sub> Cl <sub>1</sub>                |
|          |                    | 370.0477         | 32.1        | 11.9        | 18.0 | C <sub>22</sub> H <sub>10</sub> O <sub>6</sub>                 |
|          |                    | 371.0628         | 0.3         | 0.1         | 21.5 | C <sub>27</sub> H <sub>12</sub> Cl <sub>1</sub>                |
|          |                    | 371.0686         | -15.5       | -5.8        | 12.5 | C <sub>20</sub> H <sub>16</sub> O <sub>5</sub> Cl <sub>1</sub> |
|          |                    | 371.0556         | 19.7        | 7.3         | 17.5 | C <sub>22</sub> H <sub>11</sub> O <sub>6</sub>                 |
|          |                    | 371.0708         | -21.4       | -8.0        | 21.5 | C <sub>26</sub> H <sub>11</sub> O <sub>3</sub>                 |

# Compound # 23

| Mass     | Relative Intensity | Theoretical Mass | Delta [ppm] | Delta [mmu] | RDB  | Composition                                                    |
|----------|--------------------|------------------|-------------|-------------|------|----------------------------------------------------------------|
|          |                    | 201.9629         | -89.0       | -18.0       | 4.0  | C <sub>7</sub> H <sub>7</sub> O <sub>2</sub> Br <sub>1</sub>   |
|          |                    | 201.9266         | 91.2        | 18.4        | 5.0  | C <sub>6</sub> H <sub>2</sub> O <sub>3</sub> Br <sub>1</sub>   |
| 202.0629 | 3.0                | 202.0630         | -0.4        | -0.1        | 8.0  | C <sub>12</sub> H <sub>10</sub> O <sub>3</sub>                 |
|          |                    | 202.0783         | -75.9       | -15.3       | 12.0 | C <sub>16</sub> H <sub>10</sub>                                |
| 203.0791 | 1.0                | 203.0861         | -34.2       | -7.0        | 11.5 | C <sub>16</sub> H <sub>11</sub>                                |
|          |                    | 203.0708         | 40.9        | 8.3         | 7.5  | C <sub>12</sub> H <sub>11</sub> O <sub>3</sub>                 |
|          |                    | 203.0919         | -63.2       | -12.8       | 2.5  | C <sub>9</sub> H <sub>15</sub> O <sub>5</sub>                  |
| 204.0801 | 0.5                | 204.0786         | 7.0         | 1.4         | 7.0  | C <sub>12</sub> H <sub>12</sub> O <sub>3</sub>                 |
|          |                    | 204.0939         | -67.8       | -13.8       | 11.0 | C <sub>16</sub> H <sub>12</sub>                                |
|          |                    | 204.0998         | -96.5       | -19.7       | 2.0  | C <sub>9</sub> H <sub>16</sub> O <sub>5</sub>                  |
| 205.0846 | 0.8                | 205.0865         | -9.4        | -1.9        | 6.5  | C <sub>12</sub> H <sub>13</sub> O <sub>3</sub>                 |
|          |                    | 205.1017         | -83.7       | -17.2       | 10.5 | C <sub>16</sub> H <sub>13</sub>                                |
|          |                    | 205.0653         | 93.7        | 19.2        | 11.5 | C <sub>15</sub> H <sub>9</sub> O <sub>1</sub>                  |
| 213.0673 | 0.6                | 213.0704         | -14.8       | -3.2        | 13.5 | C <sub>17</sub> H <sub>9</sub>                                 |
|          |                    | 213.0763         | -42.4       | -9.0        | 4.5  | C <sub>10</sub> H <sub>13</sub> O <sub>5</sub>                 |
|          |                    | 213.0552         | 56.8        | 12.1        | 9.5  | C <sub>13</sub> H <sub>9</sub> O <sub>3</sub>                  |
| 213.1820 | 0.6                | 213.1855         | -16.3       | -3.5        | 1.5  | C <sub>13</sub> H <sub>25</sub> O <sub>2</sub>                 |
|          |                    | 213.1643         | 82.8        | 17.6        | 6.5  | C <sub>16</sub> H <sub>21</sub>                                |
| 214.0691 | 0.7                | 214.0630         | 28.4        | 6.1         | 9.0  | C <sub>13</sub> H <sub>10</sub> O <sub>3</sub>                 |
|          |                    | 214.0783         | -42.8       | -9.2        | 13.0 | C <sub>17</sub> H <sub>10</sub>                                |
|          |                    | 214.0841         | -70.3       | -15.0       | 4.0  | C <sub>10</sub> H <sub>14</sub> O <sub>5</sub>                 |
| 215.0737 | 0.8                | 215.0708         | 13.6        | 2.9         | 8.5  | C <sub>13</sub> H <sub>11</sub> O <sub>3</sub>                 |
|          |                    | 215.0861         | -57.4       | -12.3       | 12.5 | C <sub>17</sub> H <sub>11</sub>                                |
|          |                    | 215.0919         | -84.7       | -18.2       | 3.5  | C <sub>10</sub> H <sub>15</sub> O <sub>5</sub>                 |
| 216.0814 | 1.2                | 216.0786         | 12.8        | 2.8         | 8.0  | C <sub>13</sub> H <sub>12</sub> O <sub>3</sub>                 |
|          |                    | 216.0939         | -57.8       | -12.5       | 12.0 | C <sub>17</sub> H <sub>12</sub>                                |
|          |                    | 216.0998         | -85.0       | -18.4       | 3.0  | C <sub>10</sub> H <sub>16</sub> O <sub>5</sub>                 |
| 217.1869 | 0.5                | 217.1804         | 29.9        | 6.5         | 0.5  | C <sub>12</sub> H <sub>25</sub> O <sub>3</sub>                 |
|          |                    | 217.1956         | -40.3       | -8.8        | 4.5  | C <sub>16</sub> H <sub>25</sub>                                |
| 217.9743 | 0.6                | 217.9731         | 5.3         | 1.2         | 8.0  | C <sub>11</sub> H <sub>7</sub> Br <sub>1</sub>                 |
|          |                    | 217.9579         | 75.3        | 16.4        | 4.0  | C <sub>7</sub> H <sub>7</sub> O <sub>3</sub> Br <sub>1</sub>   |
|          |                    | 217.9942         | -91.6       | -20.0       | 3.0  | C <sub>8</sub> H <sub>11</sub> O <sub>2</sub> Br <sub>1</sub>  |
| 218.0560 | 3.8                | 218.0579         | -8.6        | -1.9        | 8.0  | C <sub>12</sub> H <sub>10</sub> O <sub>4</sub>                 |
|          |                    | 218.0670         | -50.3       | -11.0       | 1.0  | C <sub>10</sub> H <sub>19</sub> Br <sub>1</sub>                |
|          |                    | 218.0732         | -78.5       | -17.1       | 12.0 | C <sub>16</sub> H <sub>10</sub> O <sub>1</sub>                 |
|          |                    | 218.0368         | 88.4        | 19.3        | 13.0 | C <sub>15</sub> H <sub>6</sub> O <sub>2</sub>                  |
| 220.0817 | 0.6                | 220.0827         | -4.2        | -0.9        | 0.0  | C <sub>10</sub> H <sub>21</sub> Br <sub>1</sub>                |
|          |                    | 220.0888         | -32.2       | -7.1        | 11.0 | C <sub>16</sub> H <sub>12</sub> O <sub>1</sub>                 |
|          |                    | 220.0736         | 37.1        | 8.2         | 7.0  | C <sub>12</sub> H <sub>12</sub> O <sub>4</sub>                 |
| 263.1572 | 0.5                | 263.1647         | -28.6       | -7.5        | 5.5  | C <sub>16</sub> H <sub>23</sub> O <sub>3</sub>                 |
|          |                    | 263.1436         | 51.7        | 13.6        | 10.5 | C <sub>19</sub> H <sub>19</sub> O <sub>1</sub>                 |
|          |                    | 263.1800         | -86.6       | -22.8       | 9.5  | C <sub>20</sub> H <sub>23</sub>                                |
| 279.1609 | 6.9                | 279.1596         | 4.5         | 1.2         | 5.5  | C <sub>16</sub> H <sub>23</sub> O <sub>4</sub>                 |
|          |                    | 279.1749         | -50.2       | -14.0       | 9.5  | C <sub>20</sub> H <sub>23</sub> O <sub>1</sub>                 |
|          |                    | 279.1385         | 80.2        | 22.4        | 10.5 | C <sub>19</sub> H <sub>19</sub> O <sub>2</sub>                 |
| 280.1626 | 1.4                | 280.1675         | -17.2       | -4.8        | 5.0  | C <sub>16</sub> H <sub>24</sub> O <sub>4</sub>                 |
|          |                    | 280.1463         | 58.2        | 16.3        | 10.0 | C <sub>19</sub> H <sub>20</sub> O <sub>2</sub>                 |
|          |                    | 280.1827         | -71.7       | -20.1       | 9.0  | C <sub>20</sub> H <sub>24</sub> O <sub>1</sub>                 |
| 281.2768 | 0.6                | 281.2844         | -27.2       | -7.6        | 1.5  | C <sub>19</sub> H <sub>37</sub> O <sub>1</sub>                 |
| 414.0087 | 2.0                | 414.0103         | -3.9        | -1.6        | 13.0 | C <sub>20</sub> H <sub>15</sub> O <sub>5</sub> Br <sub>1</sub> |
|          |                    | 414.0106         | -4.6        | -1.9        | 33.0 | C <sub>33</sub> H <sub>2</sub> O <sub>1</sub>                  |
|          |                    | 414.0044         | 10.3        | 4.2         | 22.0 | C <sub>27</sub> H <sub>11</sub> Br <sub>1</sub>                |
|          |                    | 413.9953         | 32.2        | 13.3        | 29.0 | C <sub>29</sub> H <sub>2</sub> O <sub>4</sub>                  |
|          |                    | 414.0255         | -40.8       | -16.9       | 17.0 | C <sub>24</sub> H <sub>15</sub> O <sub>2</sub> Br <sub>1</sub> |
|          |                    | 413.9892         | 47.1        | 19.5        | 18.0 | C <sub>23</sub> H <sub>11</sub> O <sub>3</sub> Br <sub>1</sub> |
| 414.9984 | 0.6                | 414.9970         | 3.4         | 1.4         | 17.5 | C <sub>23</sub> H <sub>12</sub> O <sub>3</sub> Br <sub>1</sub> |
|          |                    | 415.0031         | -11.4       | -4.7        | 28.5 | C <sub>29</sub> H <sub>3</sub> O <sub>4</sub>                  |
|          |                    | 415.0122         | -33.4       | -13.8       | 21.5 | C <sub>27</sub> H <sub>12</sub> Br <sub>1</sub>                |
|          |                    | 415.0181         | -47.5       | -19.7       | 12.5 | C <sub>20</sub> H <sub>16</sub> O <sub>5</sub> Br <sub>1</sub> |
|          |                    | 415.0184         | -48.2       | -20.0       | 32.5 | C <sub>33</sub> H <sub>3</sub> O <sub>1</sub>                  |
|          |                    | 414.9759         | 54.3        | 22.5        | 22.5 | C <sub>26</sub> H <sub>9</sub> O <sub>1</sub> Br <sub>1</sub>  |
| 416.0040 | 2.0                | 416.0048         | -1.9        | -0.8        | 17.0 | C <sub>23</sub> H <sub>13</sub> O <sub>3</sub> Br <sub>1</sub> |
|          |                    | 416.0110         | -16.7       | -7.0        | 28.0 | C <sub>29</sub> H <sub>4</sub> O <sub>4</sub>                  |
|          |                    | 415.9898         | 34.1        | 14.2        | 33.0 | C <sub>32</sub> O <sub>2</sub>                                 |
|          |                    | 416.0201         | -38.6       | -16.1       | 21.0 | C <sub>27</sub> H <sub>13</sub> Br <sub>1</sub>                |
|          |                    | 415.9837         | 48.9        | 20.3        | 22.0 | C <sub>26</sub> H <sub>9</sub> O <sub>1</sub> Br <sub>1</sub>  |
|          |                    | 416.0259         | -52.7       | -21.9       | 12.0 | C <sub>20</sub> H <sub>17</sub> O <sub>5</sub> Br <sub>1</sub> |

Compound #24

| Mass     | Relative Intensity | Theoretical Mass                             | Delta [ppm]                     | Delta [mmu]                    | RDB                          | Composition                                                                                                                                                                                                       |
|----------|--------------------|----------------------------------------------|---------------------------------|--------------------------------|------------------------------|-------------------------------------------------------------------------------------------------------------------------------------------------------------------------------------------------------------------|
| 161.0092 | 1.3                | 161.0027<br>161.0239                         | 40.1<br>-91.1                   | 6.5<br>-14.7                   | 12.5<br>7.5                  | C <sub>12</sub> H <sub>11</sub> O <sub>1</sub><br>C <sub>9</sub> H <sub>5</sub> O <sub>3</sub>                                                                                                                    |
| 161.9483 | 1.4                |                                              |                                 |                                |                              |                                                                                                                                                                                                                   |
| 165.0451 | 1.8                | 165.0552<br>165.0340                         | -61.2<br>66.8                   | -10.1<br>11.0                  | 5.5<br>10.5                  | C <sub>9</sub> H <sub>9</sub> O <sub>3</sub><br>C <sub>12</sub> H <sub>5</sub> O <sub>1</sub>                                                                                                                     |
| 171.0465 | 3.4                | 171.0446                                     | 11.3                            | 1.9                            | 8.5                          | C <sub>11</sub> H <sub>7</sub> O <sub>2</sub>                                                                                                                                                                     |
| 172.0540 | 3.6                | 172.0524<br>172.0372                         | 8.9<br>97.6                     | 1.5<br>16.8                    | 8.0<br>4.0                   | C <sub>11</sub> H <sub>8</sub> O <sub>2</sub><br>C <sub>7</sub> H <sub>8</sub> O <sub>5</sub>                                                                                                                     |
| 173.0631 | 9.9                | 173.0603                                     | 16.5                            | 2.9                            | 7.5                          | C <sub>11</sub> H <sub>9</sub> O <sub>2</sub>                                                                                                                                                                     |
| 174.0686 | 2.8                | 174.0681<br>174.0528                         | 3.1<br>90.7                     | 0.5<br>15.8                    | 7.0<br>3.0                   | C <sub>11</sub> H <sub>10</sub> O <sub>2</sub><br>C <sub>7</sub> H <sub>10</sub> O <sub>5</sub>                                                                                                                   |
| 175.0462 | 1.8                | 175.0395<br>175.0548<br>175.0606             | 38.4<br>-48.8<br>-82.3          | 6.7<br>-8.5<br>-14.4           | 7.5<br>11.5<br>2.5           | C <sub>10</sub> H <sub>7</sub> O <sub>3</sub><br>C <sub>14</sub> H <sub>7</sub><br>C <sub>7</sub> H <sub>11</sub> O <sub>5</sub>                                                                                  |
| 178.0810 | 1.4                | 178.0783<br>178.0841                         | 15.6<br>-17.4                   | 2.8<br>-3.1                    | 10.0<br>1.0                  | C <sub>14</sub> H <sub>10</sub><br>C <sub>7</sub> H <sub>14</sub> O <sub>5</sub>                                                                                                                                  |
| 187.0416 | 4.3                | 187.0395<br>187.0548                         | 10.9<br>-70.7                   | 2.0<br>-13.2                   | 8.5<br>12.5                  | C <sub>11</sub> H <sub>7</sub> O <sub>3</sub><br>C <sub>15</sub> H <sub>7</sub>                                                                                                                                   |
| 188.0495 | 1.2                | 188.0473<br>188.0626                         | 11.3<br>-69.8                   | 2.1<br>-13.1                   | 8.0<br>12.0                  | C <sub>11</sub> H <sub>8</sub> O <sub>3</sub><br>C <sub>15</sub> H <sub>8</sub>                                                                                                                                   |
| 189.0613 | 2.7                | 189.0552<br>189.0704<br>189.0763             | 32.2<br>-48.5<br>-79.6          | 6.1<br>-9.2<br>-15.0           | 7.5<br>11.5<br>2.5           | C <sub>11</sub> H <sub>9</sub> O <sub>3</sub><br>C <sub>15</sub> H <sub>9</sub><br>C <sub>8</sub> H <sub>13</sub> O <sub>5</sub>                                                                                  |
| 199.0410 | 1.7                | 199.0395<br>199.0548<br>199.0606             | 7.5<br>-69.1<br>-98.6           | 1.5<br>-13.8<br>-19.6          | 9.5<br>13.5<br>4.5           | C <sub>12</sub> H <sub>7</sub> O <sub>3</sub><br>C <sub>16</sub> H <sub>7</sub><br>C <sub>9</sub> H <sub>11</sub> O <sub>5</sub>                                                                                  |
| 201.0563 | 2.6                | 201.0552<br>201.0704<br>201.0763             | 5.9<br>-70.0<br>-99.2           | 1.2<br>-14.1<br>-20.0          | 8.5<br>12.5<br>3.5           | C <sub>12</sub> H <sub>9</sub> O <sub>3</sub><br>C <sub>16</sub> H <sub>9</sub><br>C <sub>9</sub> H <sub>13</sub> O <sub>5</sub>                                                                                  |
| 202.0691 | 1.7                | 202.0630<br>202.0783<br>202.0841             | 30.2<br>-45.3<br>-74.4          | 6.1<br>-9.2<br>-15.0           | 8.0<br>12.0<br>3.0           | C <sub>12</sub> H <sub>10</sub> O <sub>3</sub><br>C <sub>16</sub> H <sub>10</sub><br>C <sub>9</sub> H <sub>14</sub> O <sub>5</sub>                                                                                |
| 203.0799 | 1.1                | 203.0861<br>203.0708<br>203.0919             | -30.3<br>44.9<br>-59.2          | -6.1<br>9.1<br>-12.0           | 11.5<br>7.5<br>2.5           | C <sub>16</sub> H <sub>11</sub><br>C <sub>12</sub> H <sub>11</sub> O <sub>3</sub><br>C <sub>9</sub> H <sub>15</sub> O <sub>5</sub>                                                                                |
| 216.9564 | 62.7               | 216.9514<br>216.9362                         | 22.8<br>93.1                    | 4.9<br>20.2                    | 4.5<br>0.5                   | C <sub>7</sub> H <sub>6</sub> I <sub>1</sub><br>C <sub>3</sub> H <sub>6</sub> O <sub>3</sub> I <sub>1</sub>                                                                                                       |
| 217.0561 | 15.4               | 217.0501<br>217.0653                         | 27.8<br>-42.5                   | 6.0<br>-9.2                    | 8.5<br>12.5                  | C <sub>12</sub> H <sub>9</sub> O <sub>4</sub><br>C <sub>16</sub> H <sub>9</sub> O <sub>1</sub>                                                                                                                    |
| 217.9635 | 14.8               | 217.9592<br>217.9440                         | 19.4<br>89.4                    | 4.2<br>19.5                    | 4.0<br>0.0                   | C <sub>7</sub> H <sub>7</sub> I <sub>1</sub><br>C <sub>3</sub> H <sub>7</sub> O <sub>3</sub> I <sub>1</sub>                                                                                                       |
| 218.0637 | 3.4                | 218.0579<br>218.0732                         | 26.7<br>-43.3                   | 5.8<br>-9.4                    | 8.0<br>12.0                  | C <sub>12</sub> H <sub>10</sub> O <sub>4</sub><br>C <sub>16</sub> H <sub>10</sub> O <sub>1</sub>                                                                                                                  |
| 219.0760 | 1.1                | 219.0810<br>219.0657                         | -22.6<br>47.0                   | -5.0<br>10.3                   | 11.5<br>7.5                  | C <sub>16</sub> H <sub>11</sub> O <sub>1</sub><br>C <sub>12</sub> H <sub>11</sub> O <sub>4</sub>                                                                                                                  |
| 231.9443 | 1.4                | 231.9385<br>231.9596<br>231.9233             | 24.9<br>-66.2<br>90.7           | 5.8<br>-15.4<br>21.0           | 5.0<br>0.0<br>1.0            | C <sub>7</sub> H <sub>5</sub> O <sub>1</sub> I <sub>1</sub><br>C <sub>4</sub> H <sub>9</sub> O <sub>3</sub> I <sub>1</sub><br>C <sub>3</sub> H <sub>5</sub> O <sub>4</sub> I <sub>1</sub>                         |
| 233.9552 | 2.1                | 233.9542<br>233.9389                         | 4.4<br>69.6                     | 1.0<br>16.3                    | 4.0<br>0.0                   | C <sub>7</sub> H <sub>7</sub> O <sub>1</sub> I <sub>1</sub><br>C <sub>3</sub> H <sub>7</sub> O <sub>4</sub> I <sub>1</sub>                                                                                        |
| 251.9194 | 6.9                | 251.9283<br>251.9072<br>251.9436             | -35.4<br>48.5<br>-95.9          | -8.9<br>12.2<br>-24.2          | 4.0<br>9.0<br>8.0            | C <sub>6</sub> H <sub>5</sub> O <sub>3</sub> I <sub>1</sub><br>C <sub>9</sub> H <sub>1</sub> O <sub>1</sub> I <sub>1</sub><br>C <sub>10</sub> H <sub>5</sub> I <sub>1</sub>                                       |
| 253.9156 | 2.3                | 253.9229<br>253.9076                         | -28.4<br>31.7                   | -7.2<br>8.0                    | 8.0<br>4.0                   | C <sub>9</sub> H <sub>3</sub> O <sub>1</sub> I <sub>1</sub><br>C <sub>5</sub> H <sub>3</sub> O <sub>4</sub> I <sub>1</sub>                                                                                        |
| 274.0084 | 3.0                | 274.0066<br>274.0055<br>274.0218<br>273.9902 | 6.6<br>10.7<br>-49.1<br>66.3    | 1.8<br>2.9<br>-13.4<br>18.2    | 0.0<br>20.0<br>4.0<br>16.0   | C <sub>7</sub> H <sub>15</sub> O <sub>3</sub> I <sub>1</sub><br>C <sub>20</sub> H <sub>2</sub> O <sub>2</sub><br>C <sub>11</sub> H <sub>15</sub> I <sub>1</sub><br>C <sub>16</sub> H <sub>2</sub> O <sub>5</sub>  |
| 343.8484 | 1.4                |                                              |                                 |                                |                              |                                                                                                                                                                                                                   |
| 434.0002 | 4.7                | 434.0004<br>434.0015<br>434.0157<br>434.0168 | -0.5<br>-3.0<br>-35.6<br>-38.2  | -0.2<br>-1.3<br>-15.5<br>-16.6 | 32.0<br>12.0<br>36.0<br>16.0 | C <sub>32</sub> H <sub>2</sub> O <sub>3</sub><br>C <sub>19</sub> H <sub>15</sub> O <sub>4</sub> I <sub>1</sub><br>C <sub>36</sub> H <sub>2</sub><br>C <sub>23</sub> H <sub>15</sub> O <sub>1</sub> I <sub>1</sub> |
| 435.0002 | 1.0                | 435.0082<br>435.0093<br>434.9882<br>435.0235 | -18.5<br>-21.0<br>27.6<br>-53.5 | -8.0<br>-9.1<br>12.0<br>-23.3  | 31.5<br>11.5<br>16.5<br>35.5 | C <sub>32</sub> H <sub>3</sub> O <sub>3</sub><br>C <sub>19</sub> H <sub>16</sub> O <sub>4</sub> I <sub>1</sub><br>C <sub>22</sub> H <sub>12</sub> O <sub>2</sub> I <sub>1</sub><br>C <sub>36</sub> H <sub>3</sub> |

Compound # 25

| Mass     | Relative Intensity | Theoretical Mass | Delta [ppm] | Delta [mmu] | RDB  | Composition                                                   |
|----------|--------------------|------------------|-------------|-------------|------|---------------------------------------------------------------|
| 189.0642 | 1.0                | 188.0559         | -24.6       | -4.6        | 3.5  | C <sub>7</sub> H <sub>10</sub> O <sub>5</sub> N <sub>1</sub>  |
|          |                    | 189.0637         | 2.6         | 0.5         | 3.0  | C <sub>7</sub> H <sub>11</sub> O <sub>5</sub> N <sub>1</sub>  |
|          |                    | 189.0704         | -32.9       | -6.2        | 11.5 | C <sub>15</sub> H <sub>9</sub>                                |
| 190.0650 | 1.1                | 189.0578         | 33.6        | 6.4         | 12.0 | C <sub>14</sub> H <sub>7</sub> N <sub>1</sub>                 |
|          |                    | 190.0657         | -3.4        | -0.6        | 11.5 | C <sub>14</sub> H <sub>8</sub> N <sub>1</sub>                 |
|          |                    | 190.0630         | 10.7        | 2.0         | 7.0  | C <sub>11</sub> H <sub>10</sub> O <sub>3</sub>                |
| 199.0399 | 13.4               | 190.0715         | -34.3       | -6.5        | 2.5  | C <sub>7</sub> H <sub>12</sub> O <sub>5</sub> N <sub>1</sub>  |
|          |                    | 199.0395         | 1.8         | 0.4         | 9.5  | C <sub>12</sub> H <sub>7</sub> O <sub>3</sub>                 |
|          |                    | 199.0422         | -11.6       | -2.3        | 14.0 | C <sub>15</sub> H <sub>5</sub> N <sub>1</sub>                 |
| 200.0470 | 5.4                | 199.0454         | -27.7       | -5.5        | 0.5  | C <sub>5</sub> H <sub>11</sub> O <sub>8</sub>                 |
|          |                    | 200.0473         | -1.9        | -0.4        | 9.0  | C <sub>12</sub> H <sub>8</sub> O <sub>3</sub>                 |
|          |                    | 200.0500         | -15.3       | -3.1        | 13.5 | C <sub>15</sub> H <sub>6</sub> N <sub>1</sub>                 |
| 201.0537 | 22.7               | 200.0532         | -31.3       | -6.3        | 0.0  | C <sub>5</sub> H <sub>12</sub> O <sub>8</sub>                 |
|          |                    | 201.0552         | -7.4        | -1.5        | 8.5  | C <sub>12</sub> H <sub>8</sub> O <sub>3</sub>                 |
|          |                    | 201.0578         | -20.7       | -4.2        | 13.0 | C <sub>15</sub> H <sub>9</sub> N <sub>1</sub>                 |
| 202.0584 | 4.2                | 201.0485         | 25.9        | 5.2         | 0.0  | C <sub>4</sub> H <sub>11</sub> O <sub>8</sub> N <sub>1</sub>  |
|          |                    | 202.0630         | -22.8       | -4.6        | 8.0  | C <sub>12</sub> H <sub>10</sub> O <sub>3</sub>                |
|          |                    | 202.0657         | -36.1       | -7.3        | 12.5 | C <sub>15</sub> H <sub>8</sub> N <sub>1</sub>                 |
| 216.0422 | 1.8                | 202.0504         | 39.4        | 8.0         | 8.5  | C <sub>11</sub> H <sub>8</sub> O <sub>3</sub> N <sub>1</sub>  |
|          |                    | 216.0423         | -0.5        | -0.1        | 9.0  | C <sub>12</sub> H <sub>8</sub> O <sub>4</sub>                 |
|          |                    | 216.0449         | -12.9       | -2.8        | 13.5 | C <sub>15</sub> H <sub>6</sub> O <sub>1</sub> N <sub>1</sub>  |
| 217.0489 | 2.0                | 216.0508         | -40.1       | -8.7        | 4.5  | C <sub>8</sub> H <sub>10</sub> O <sub>6</sub> N <sub>1</sub>  |
|          |                    | 217.0501         | -5.2        | -1.1        | 8.5  | C <sub>12</sub> H <sub>9</sub> O <sub>4</sub>                 |
|          |                    | 217.0528         | -17.6       | -3.8        | 13.0 | C <sub>15</sub> H <sub>7</sub> O <sub>1</sub> N <sub>1</sub>  |
| 218.0554 | 25.3               | 217.0586         | -44.6       | -9.7        | 4.0  | C <sub>8</sub> H <sub>11</sub> O <sub>6</sub> N <sub>1</sub>  |
|          |                    | 218.0579         | -11.5       | -2.5        | 8.0  | C <sub>12</sub> H <sub>10</sub> O <sub>4</sub>                |
|          |                    | 218.0606         | -23.7       | -5.2        | 12.5 | C <sub>15</sub> H <sub>8</sub> O <sub>1</sub> N <sub>1</sub>  |
| 219.0603 | 3.8                | 218.0453         | 46.2        | 10.1        | 8.5  | C <sub>11</sub> H <sub>9</sub> O <sub>4</sub> N <sub>1</sub>  |
|          |                    | 219.0657         | -24.6       | -5.4        | 7.5  | C <sub>12</sub> H <sub>11</sub> O <sub>4</sub>                |
|          |                    | 219.0532         | 32.8        | 7.2         | 8.0  | C <sub>11</sub> H <sub>9</sub> O <sub>4</sub> N <sub>1</sub>  |
| 220.0581 | 1.2                | 219.0684         | -36.8       | -8.1        | 12.0 | C <sub>15</sub> H <sub>9</sub> O <sub>1</sub> N <sub>1</sub>  |
|          |                    | 220.0583         | -0.7        | -0.2        | 3.0  | C <sub>8</sub> H <sub>12</sub> O <sub>7</sub>                 |
|          |                    | 220.0610         | -12.9       | -2.8        | 7.5  | C <sub>11</sub> H <sub>10</sub> O <sub>4</sub> N <sub>1</sub> |
| 381.0857 | 10.5               | 220.0524         | 26.0        | 5.7         | 12.0 | C <sub>15</sub> H <sub>8</sub> O <sub>2</sub>                 |
|          |                    | 381.0849         | 2.2         | 0.9         | 14.0 | C <sub>20</sub> H <sub>15</sub> O <sub>7</sub> N <sub>1</sub> |
|          |                    | 381.0916         | -15.4       | -5.9        | 22.5 | C <sub>28</sub> H <sub>13</sub> O <sub>2</sub>                |
| 382.0880 | 2.6                | 381.0790         | 17.6        | 6.7         | 23.0 | C <sub>27</sub> H <sub>11</sub> O <sub>2</sub> N <sub>1</sub> |
|          |                    | 382.0868         | 3.2         | 1.2         | 22.5 | C <sub>27</sub> H <sub>12</sub> O <sub>2</sub> N <sub>1</sub> |
|          |                    | 382.0841         | 10.2        | 3.9         | 18.0 | C <sub>24</sub> H <sub>14</sub> O <sub>5</sub>                |
|          |                    | 382.0927         | -12.2       | -4.6        | 13.5 | C <sub>20</sub> H <sub>16</sub> O <sub>7</sub> N <sub>1</sub> |
