# Supplementary material for: Multitarget synthetic piperates against key drug targets of Alzheimer's and diabetes mellitus
Source: Royal Society of Chemistry journal article supplement (doi:10.1039/d6ra00843g), 2026-03-30
Supplement: d6ra00843g5.pdf [file d6ra00843g5.pdf]

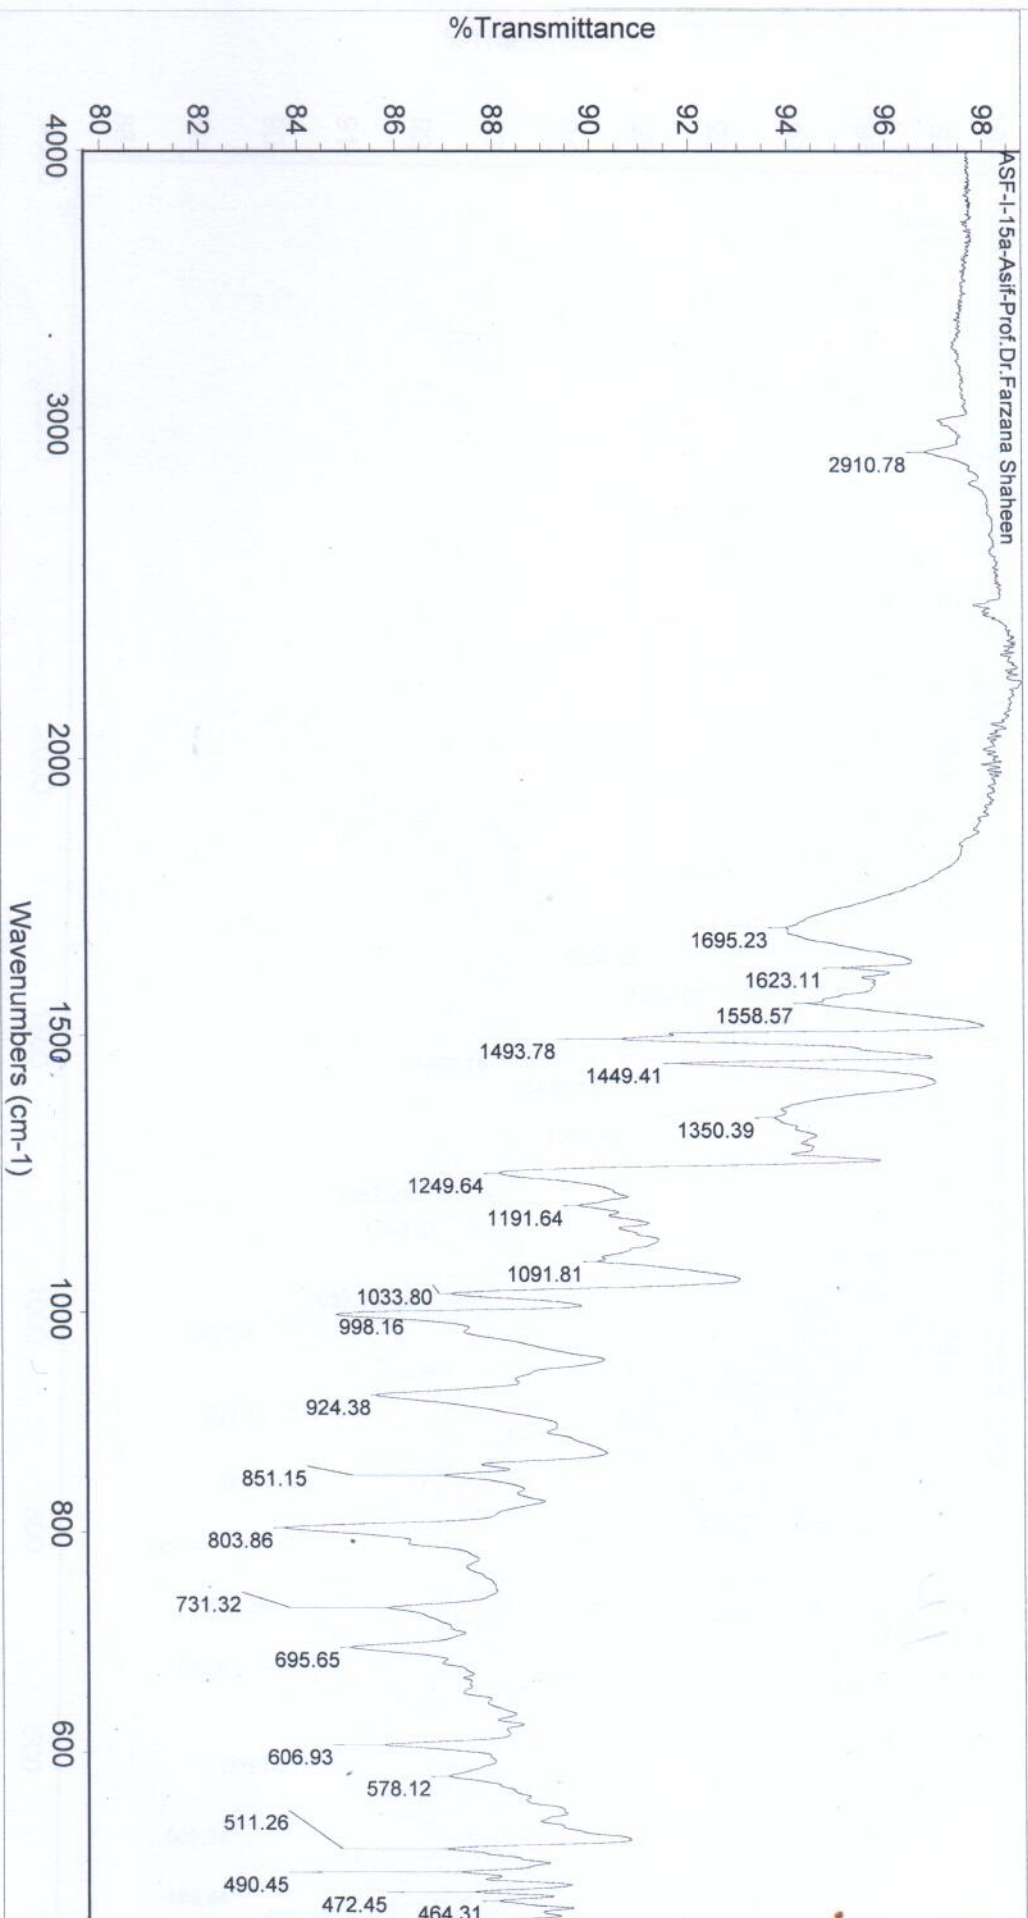

ASF-I-15a-Asif-Prof.Dr.Farzana Shaheen

Analyst : Asif

Technique: FTIR-ATR

Number of sample scans: 16

Number of background scans: 16

Resolution: 4.000

Sample gain: 1.0

Optical velocity: 0.4747

Aperture: 150.00

Tue Sep 24 15:46:13 2024 (C

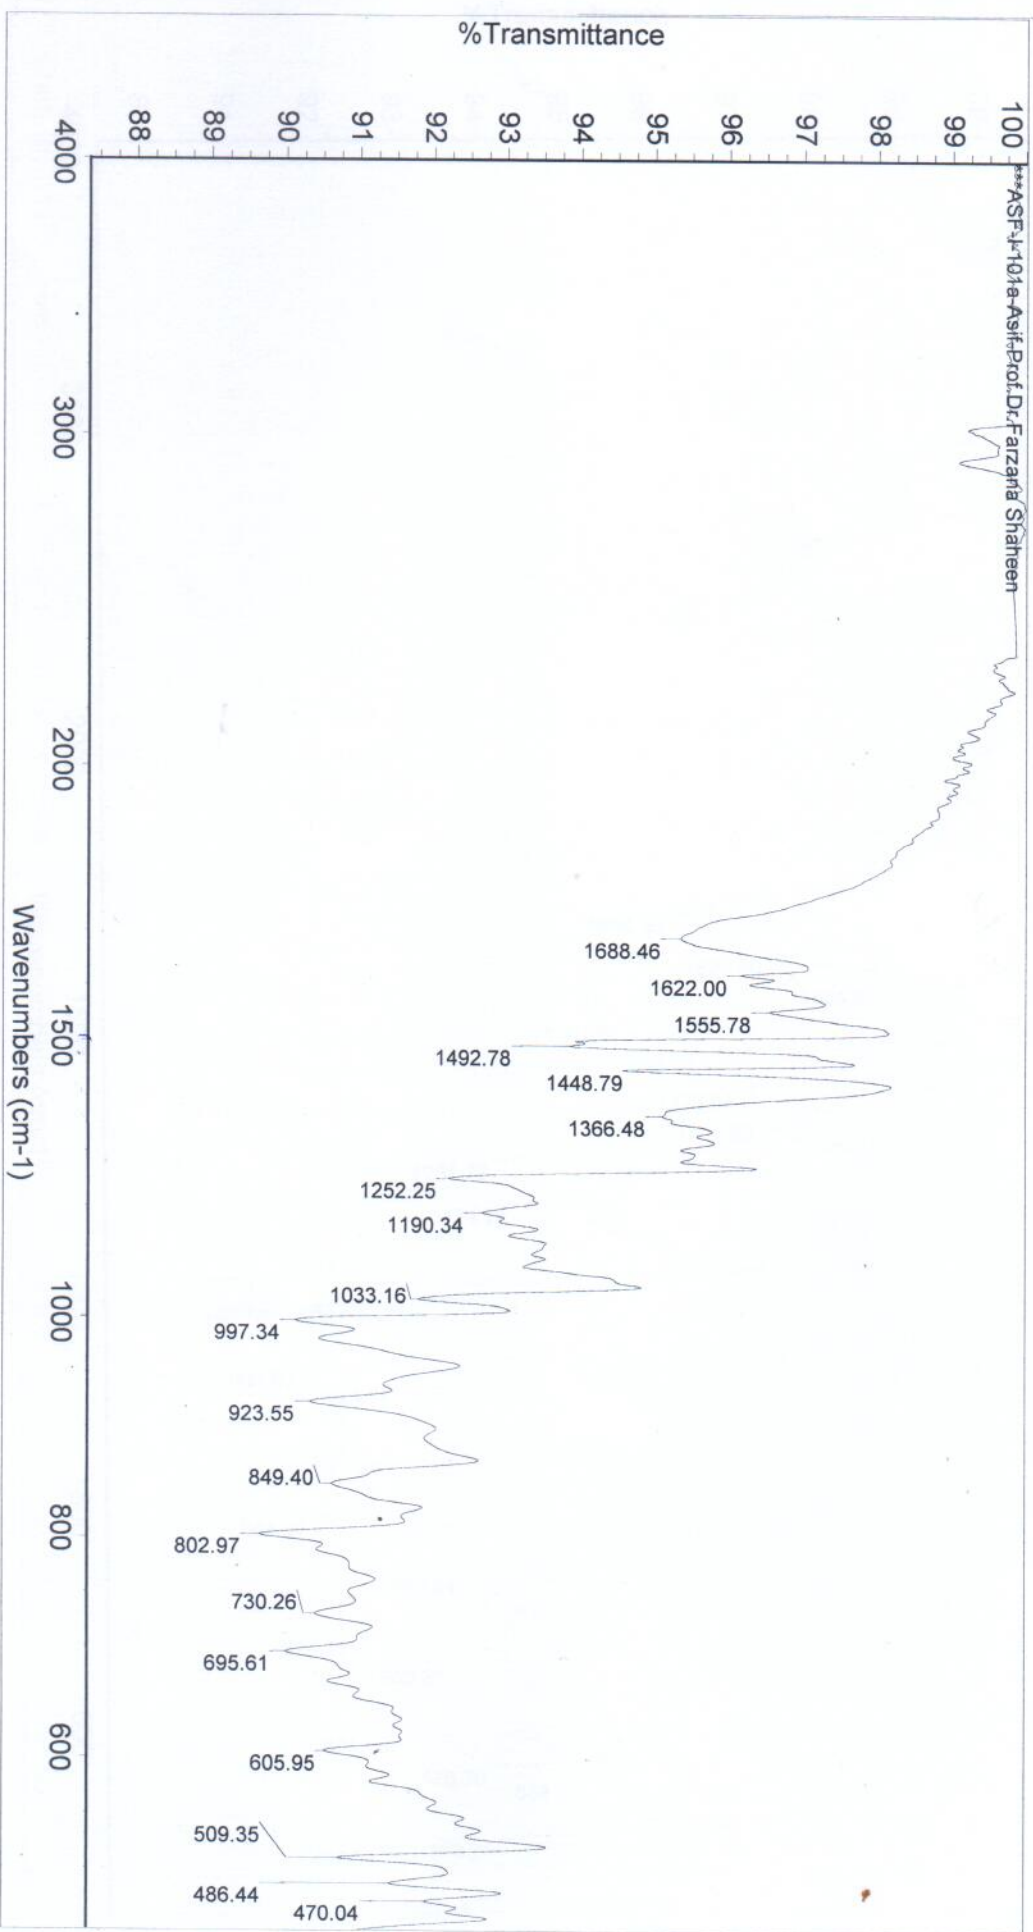

\*\*\*ASF-I-101a-Asif-Prof.Dr.Farzana Shaheen

Analyst : Asif

Technique: FTIR-ATR

Number of sample scans: 16  
Number of background scans: 16  
Resolution: 4.000  
Sample gain: 1.0  
Optical velocity: 0.4747  
Aperture: 150.00

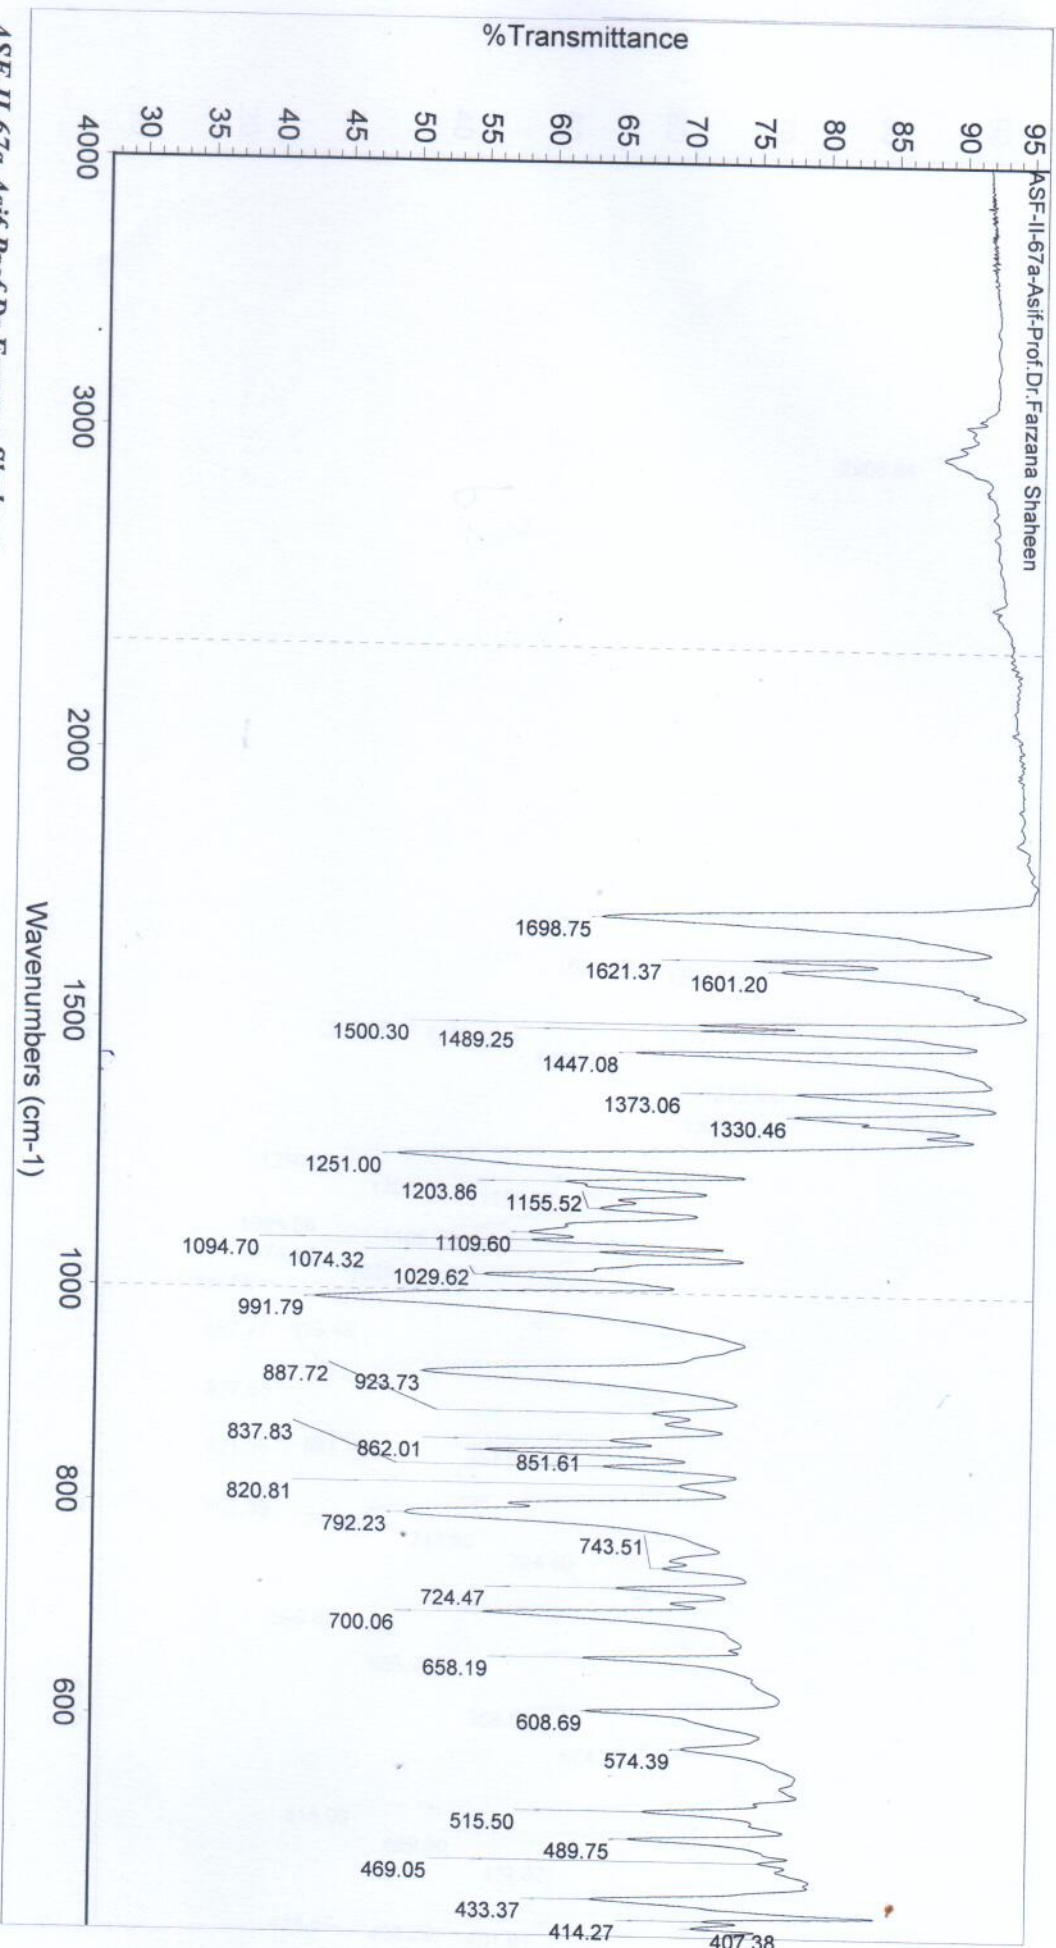

ASF-II-67a-Asif-Prof. Dr. Farzana Shaheen

Analyst : Zubair

Technique: FTIR-ATR

Number of sample scans: 16

Number of background scans: 16

Resolution: 4.000

Sample gain: 1.0

Optical velocity: 0.4747

Aperture: 150.00

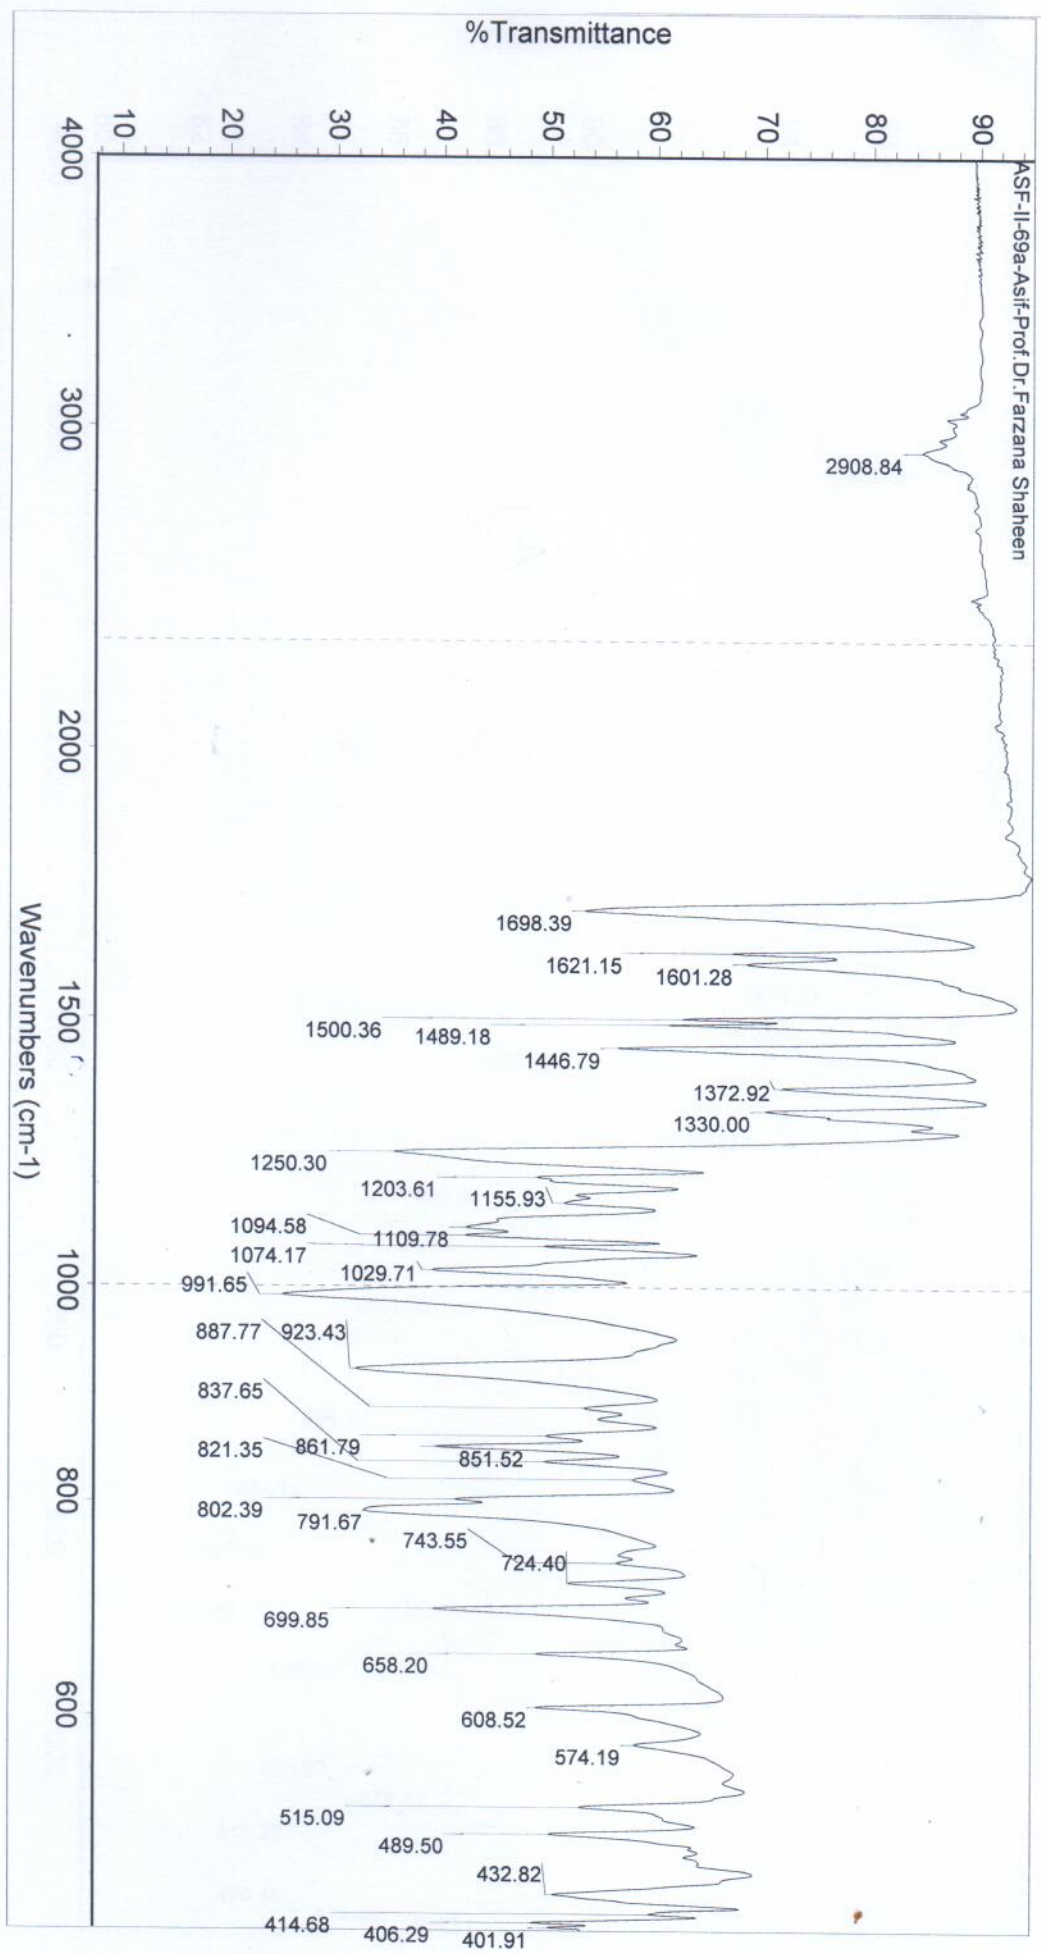

ASF-II-69a-Asif-Prof. Dr. Farzana Shaheen

Analyst : Zubair

Technique: FTIR-ATR

Number of sample scans: 16  
Number of background scans: 16  
Resolution: 4.000  
Sample gain: 1.0  
Optical velocity: 0.4747  
Aperture: 150.00

Wed Sep 25 15:14:37 2024

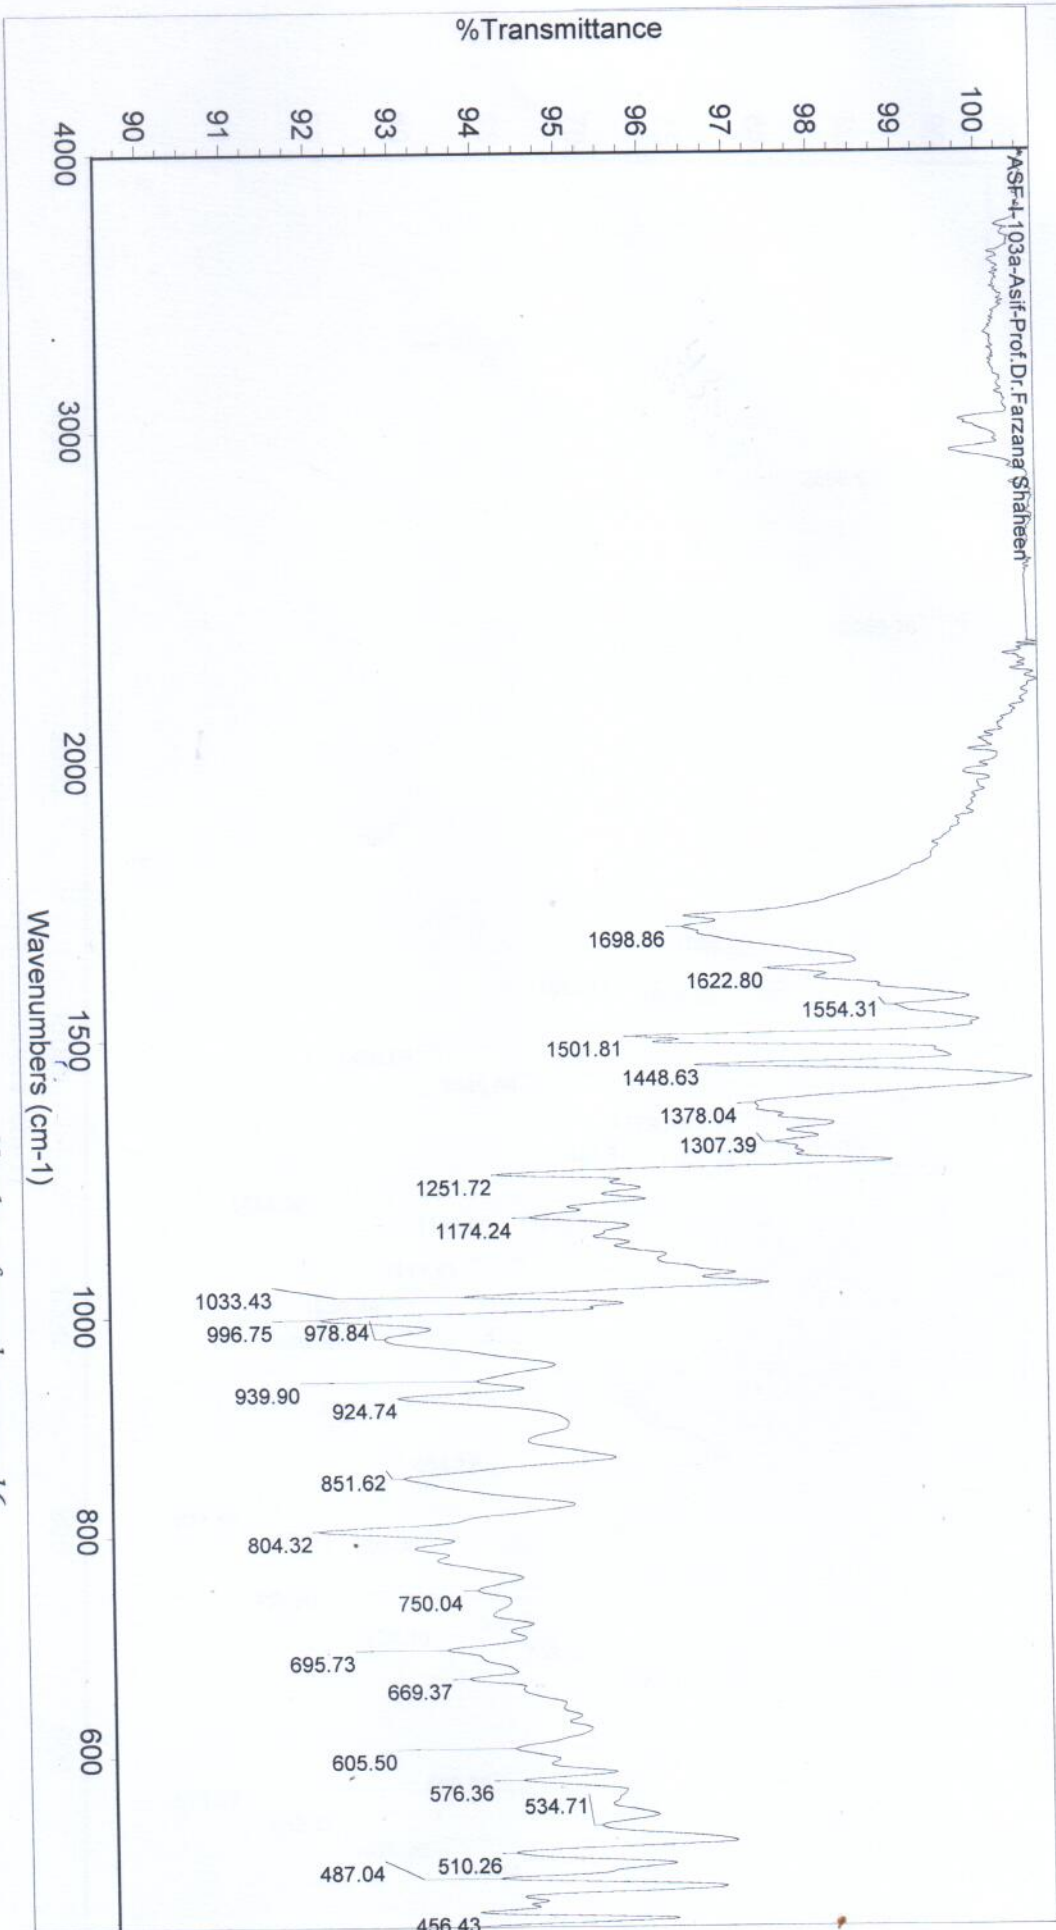

\*ASF-I-103a-Asif-Prof. Dr. Farzana Shaheen

Analyst : Asif

Technique: FTIR-ATR

Number of sample scans: 16  
Number of background scans: 16  
Resolution: 4.000  
Sample gain: 1.0  
Optical velocity: 0.4747  
Aperture: 150.00

Tue Sep 24 15:52:32 2024 (

Analytical Laboratory at Nanotechnology, I.C.C.B.S., University of Karachi - Pakistan  
Compound 7

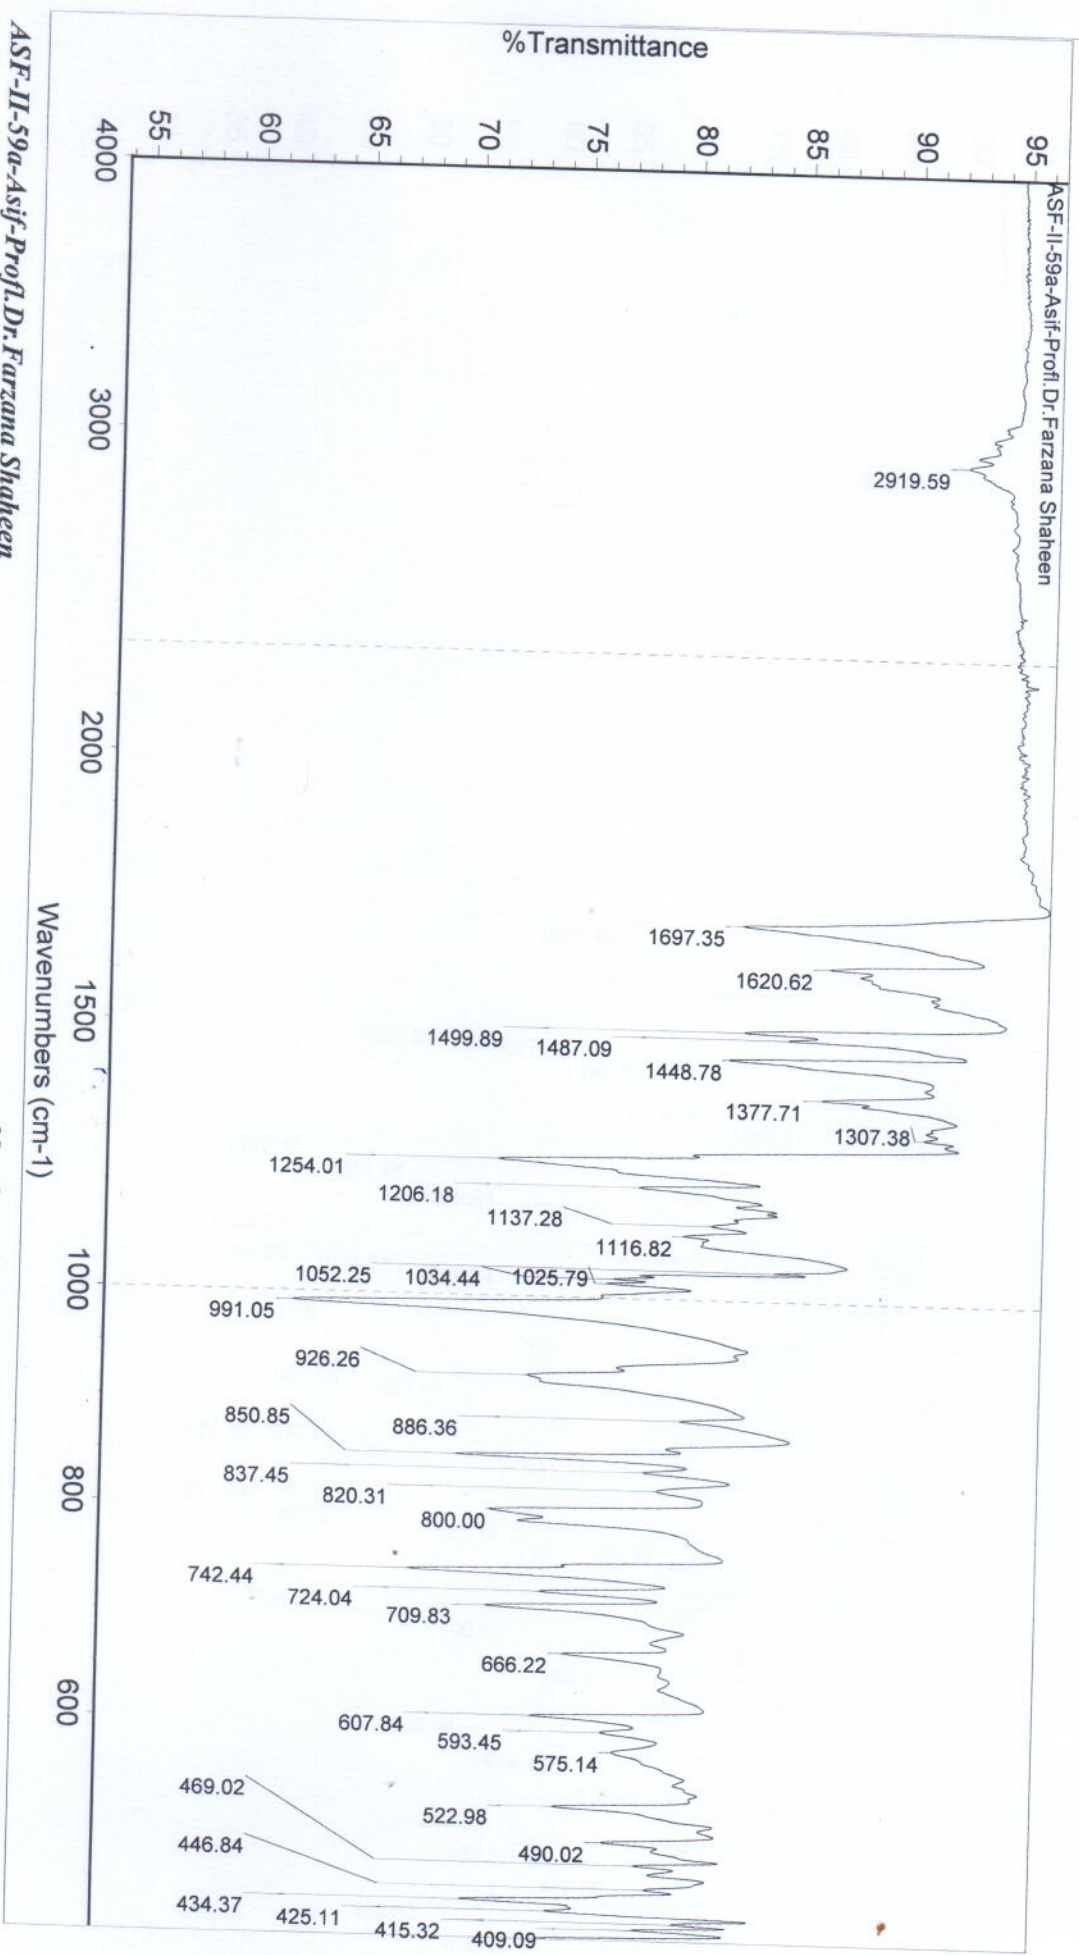

Analyst : Asif  
Technique: FTIR-ATR

ASF-II-59a-Asif-Prof. Dr. Farzana Shaheen  
Number of sample scans: 16  
Number of background scans: 16  
Resolution: 4.000  
Sample gain: 1.0  
Optical velocity: 0.4747  
Aperture: 150.00

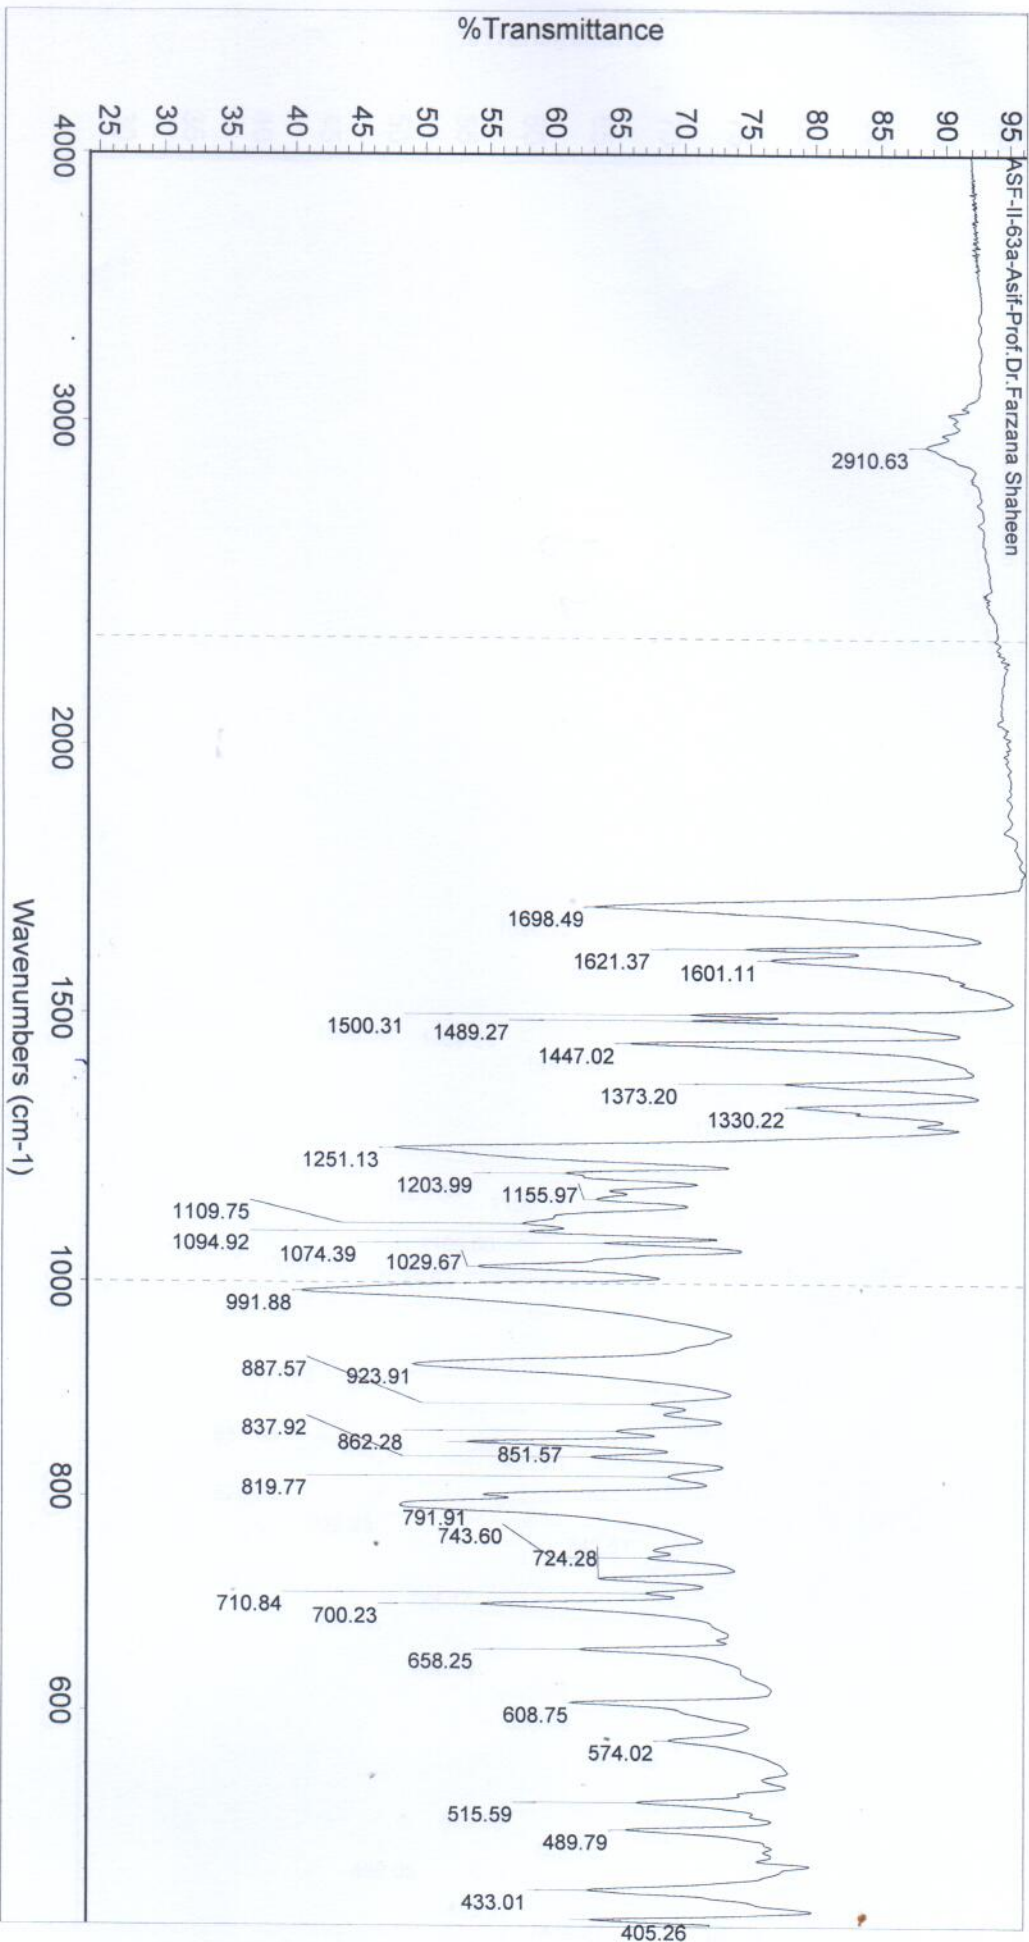

ASF-II-63a-Asif-Prof.Dr.Farzana Shaheen

Analyst : Zubair

Technique: FTIR-ATR

Number of sample scans: 16

Number of background scans: 16

Resolution: 4.000

Sample gain: 1.0

Optical velocity: 0.4747

Aperture: 150.00

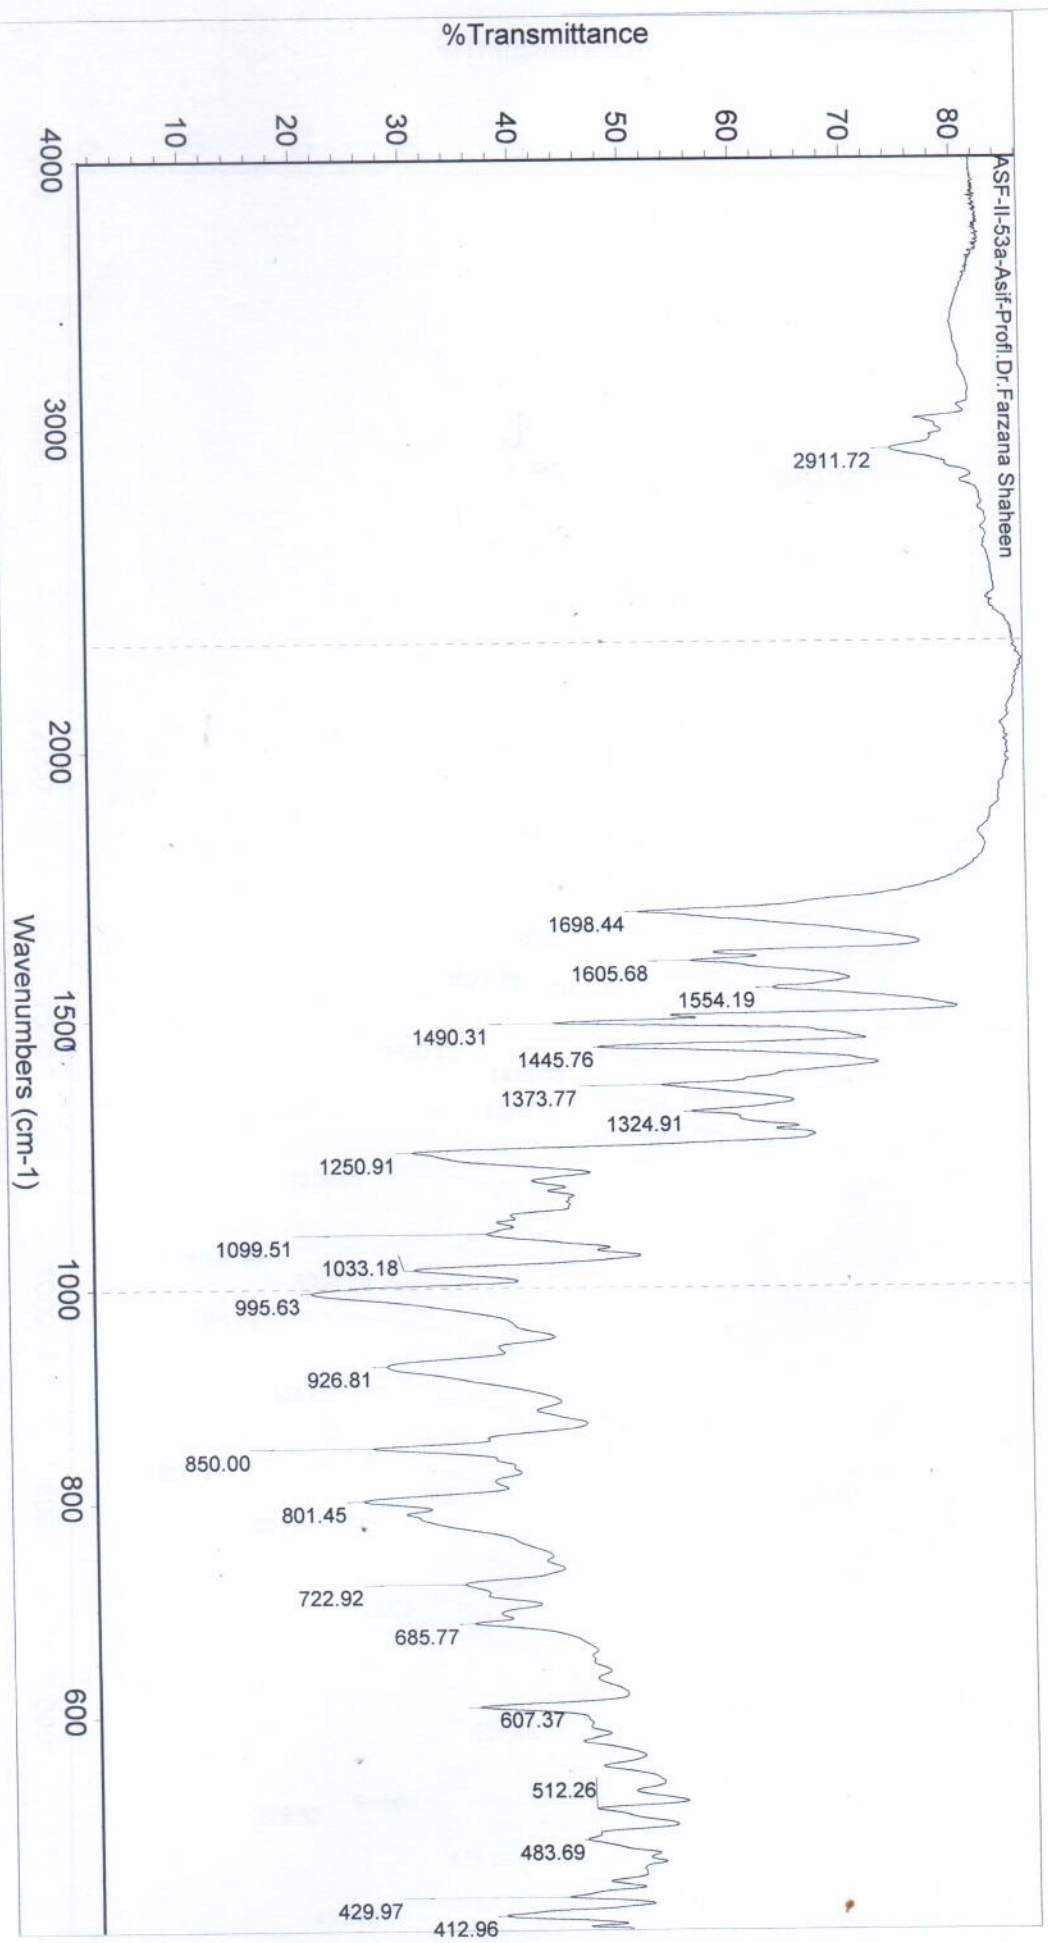

ASF-II-53a-Asif-Prof. Dr. Farzana Shaheen

Analyst :

Technique: FTIR-ATR

Number of sample scans: 16  
Number of background scans: 16

Resolution: 4.000

Sample gain: 1.0

Optical velocity: 0.4747

Aperture: 150.00

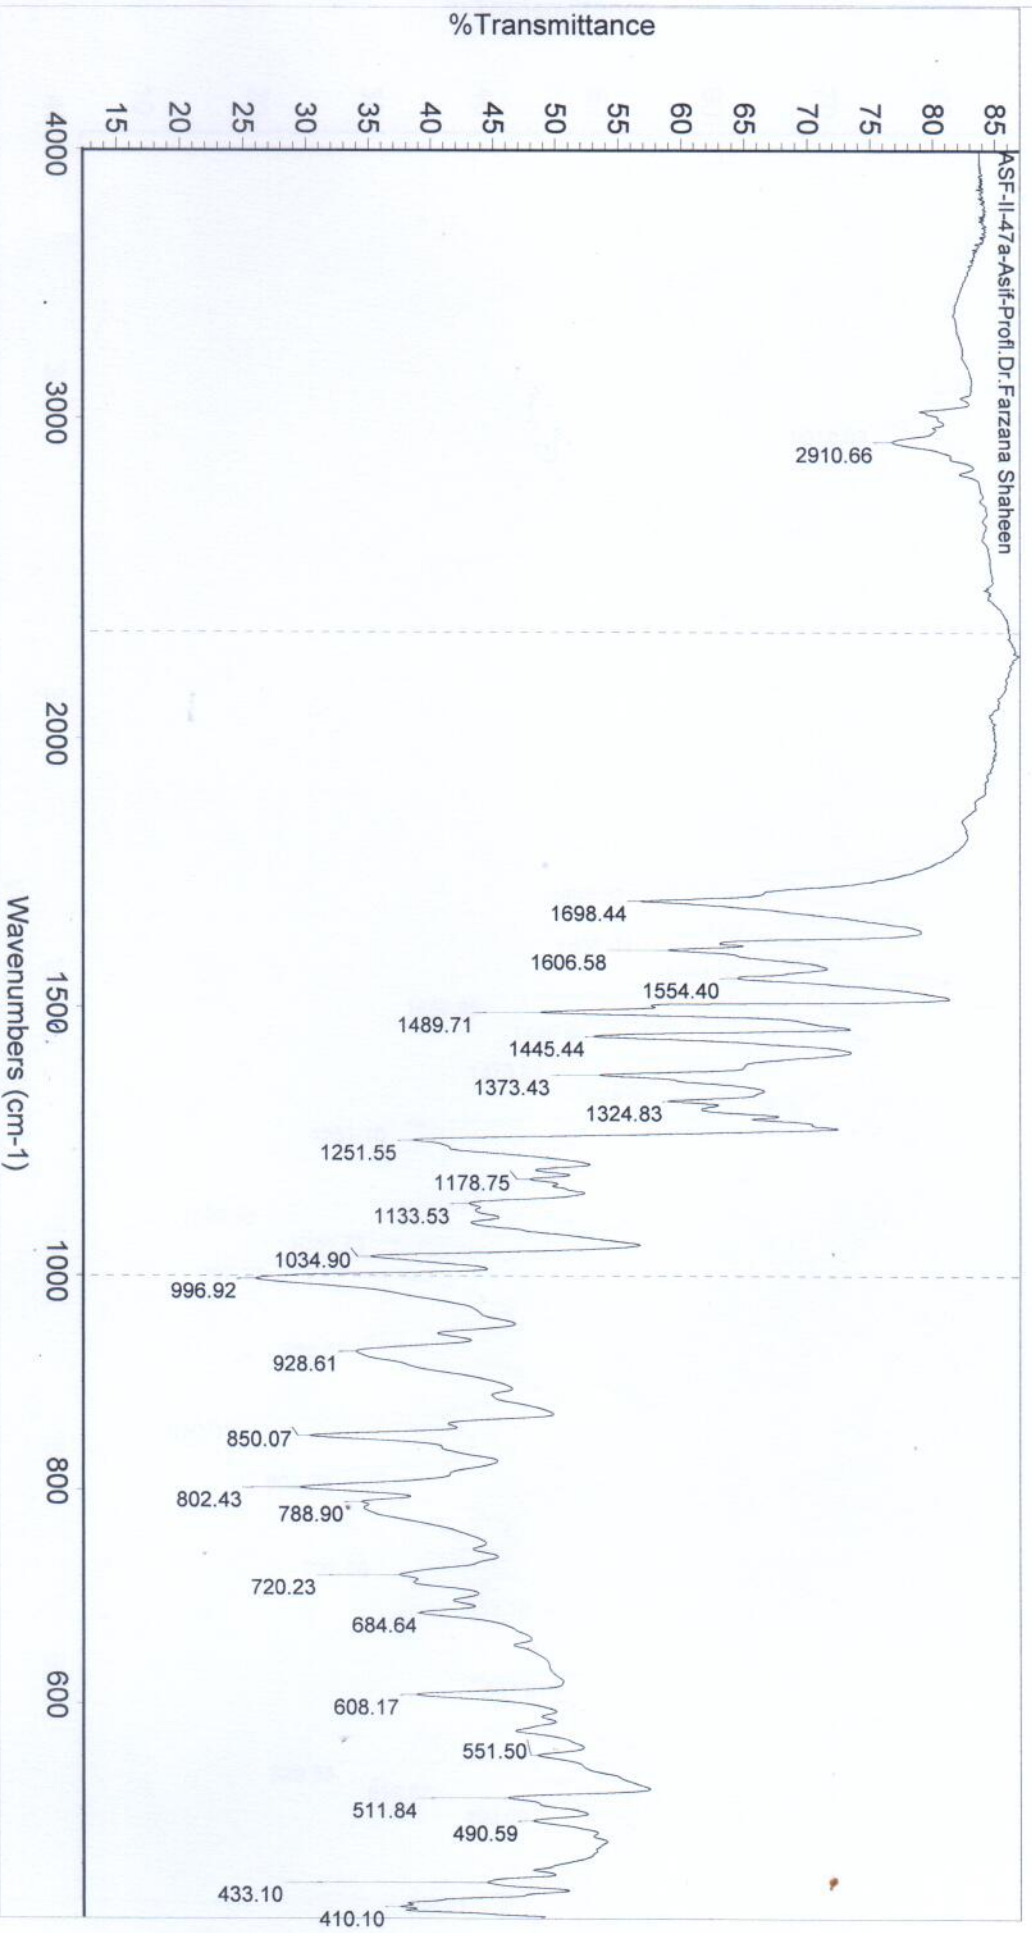

ASF-II-47a-Asif-Prof. Dr. Farzana Shaheen

Analyst :

Technique: FTIR-ATR

Number of sample scans: 16

Number of background scans: 16

Resolution: 4.000

Sample gain: 1.0

Optical velocity: 0.4747

Aperture: 150.00

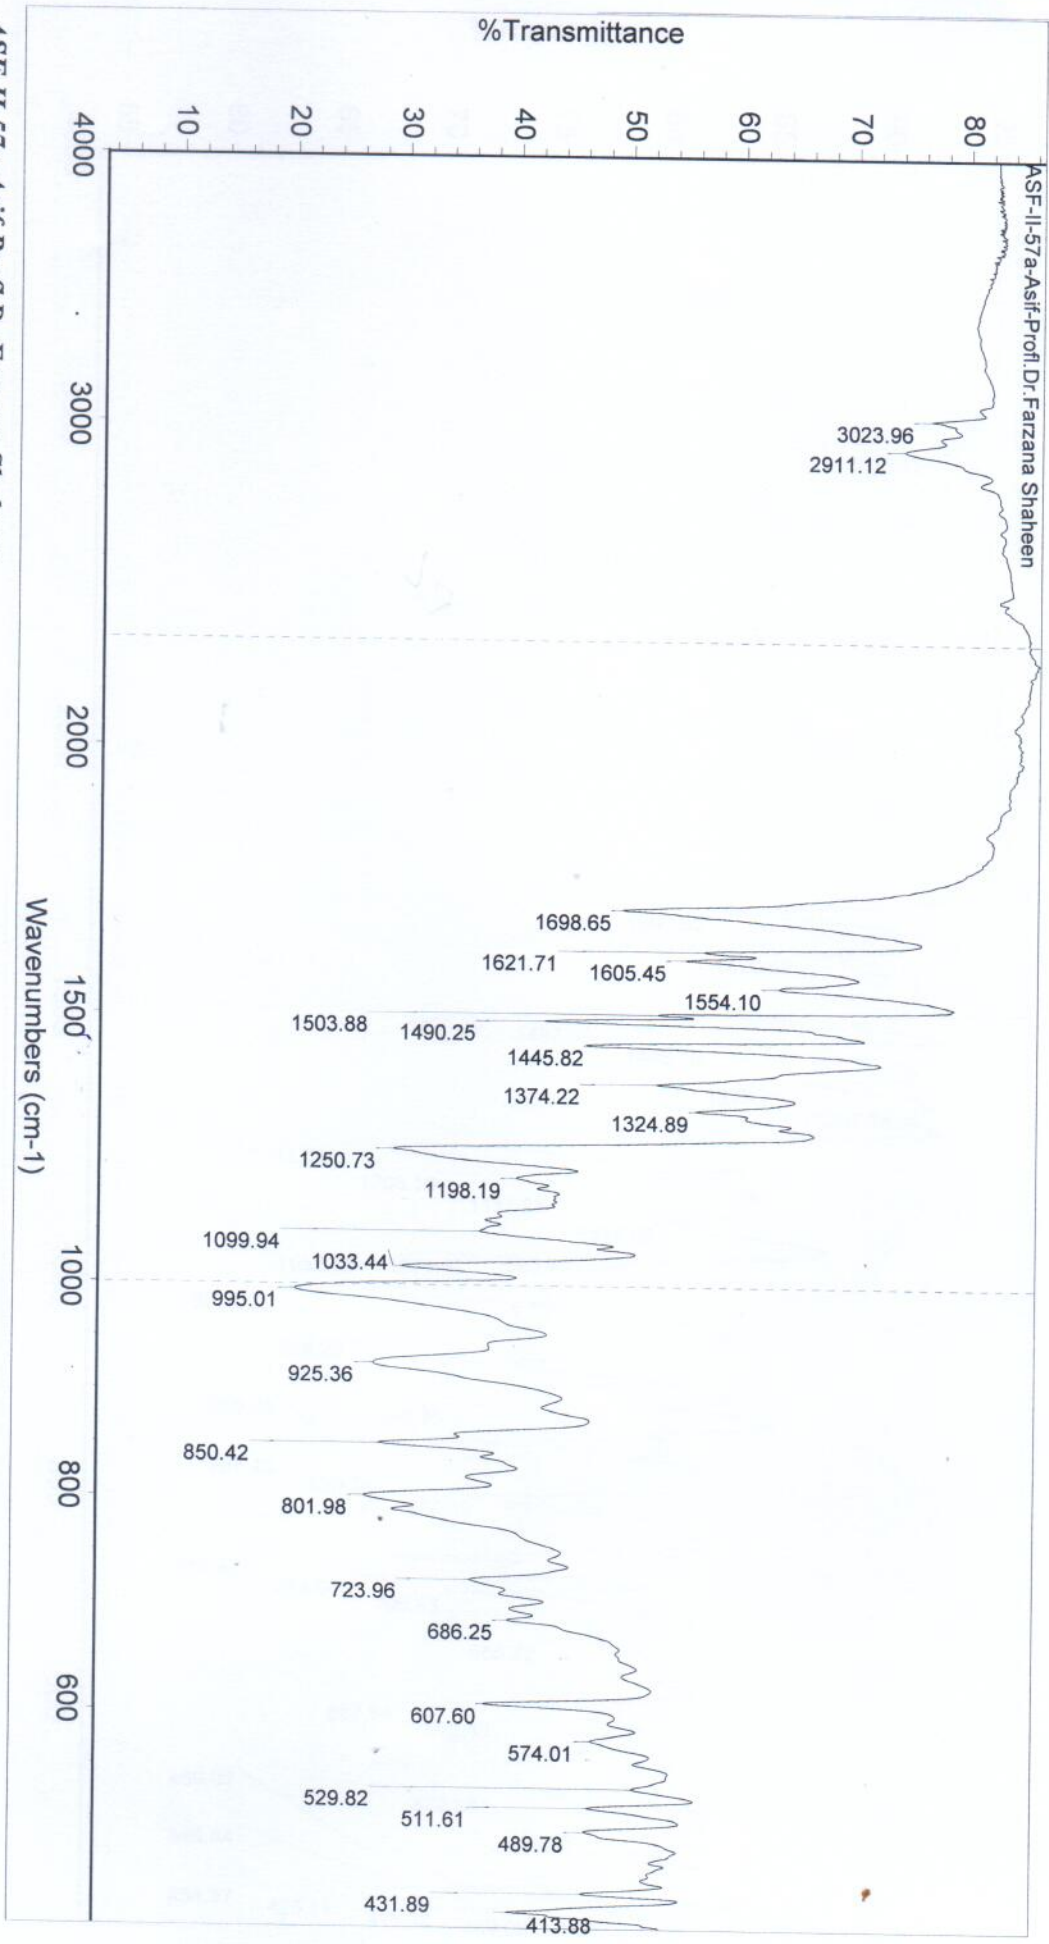

ASF-II-57a-Asif-Prof. Dr. Farzana Shaheen

Analyst : Zubair Ahmed

Technique: FTIR-ATR

Number of sample scans: 16  
Number of background scans: 16  
Resolution: 4.000  
Sample gain: 1.0  
Optical velocity: 0.4747  
Aperture: 150.00

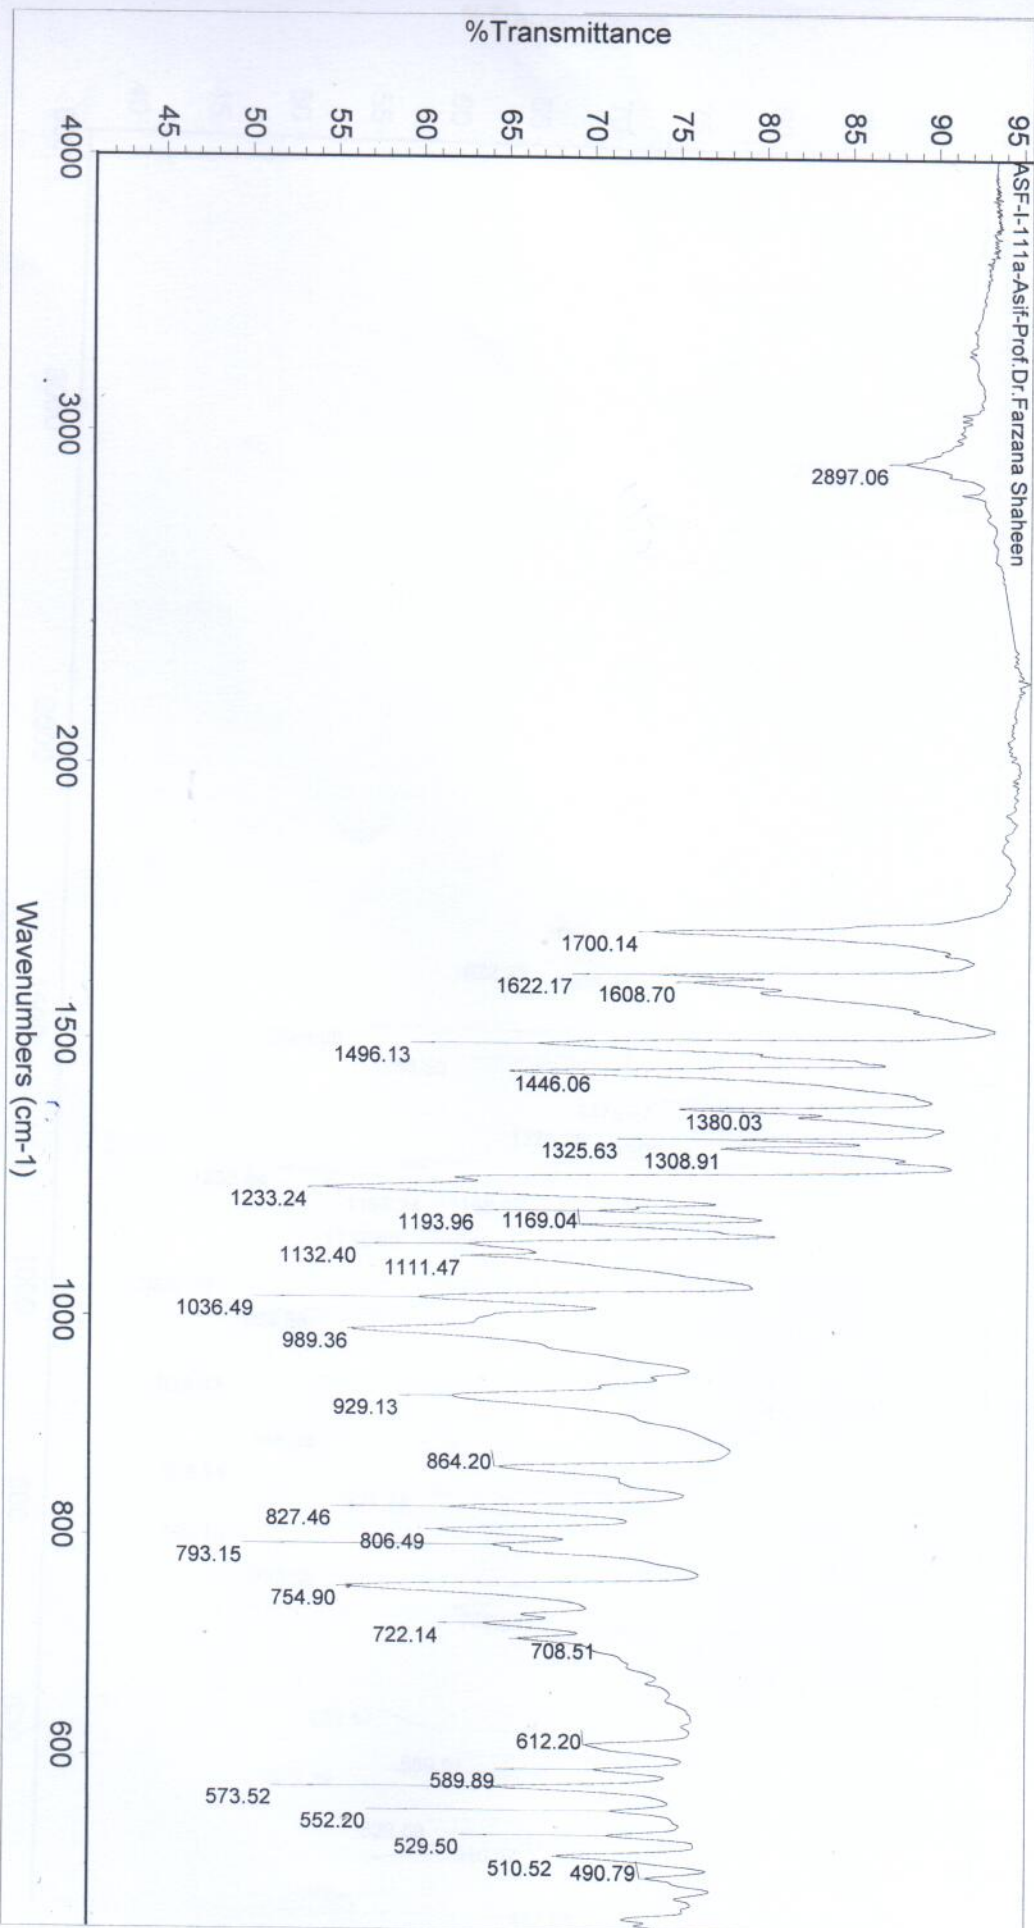

ASF-I-111a-Asif-Prof.Dr.Farzana Shaheen

Analyst : Asif

Technique: FTIR-ATR

Number of sample scans: 16

Number of background scans: 16

Resolution: 4.000

Sample gain: 1.0

Optical velocity: 0.4747

Aperture: 150.00

Tue Sep 24 15:56:55 2024 (

Analytical Laboratory at Nanotechnology, I.C.C.B.S., University of Karachi - Pakistan  
Compound 13

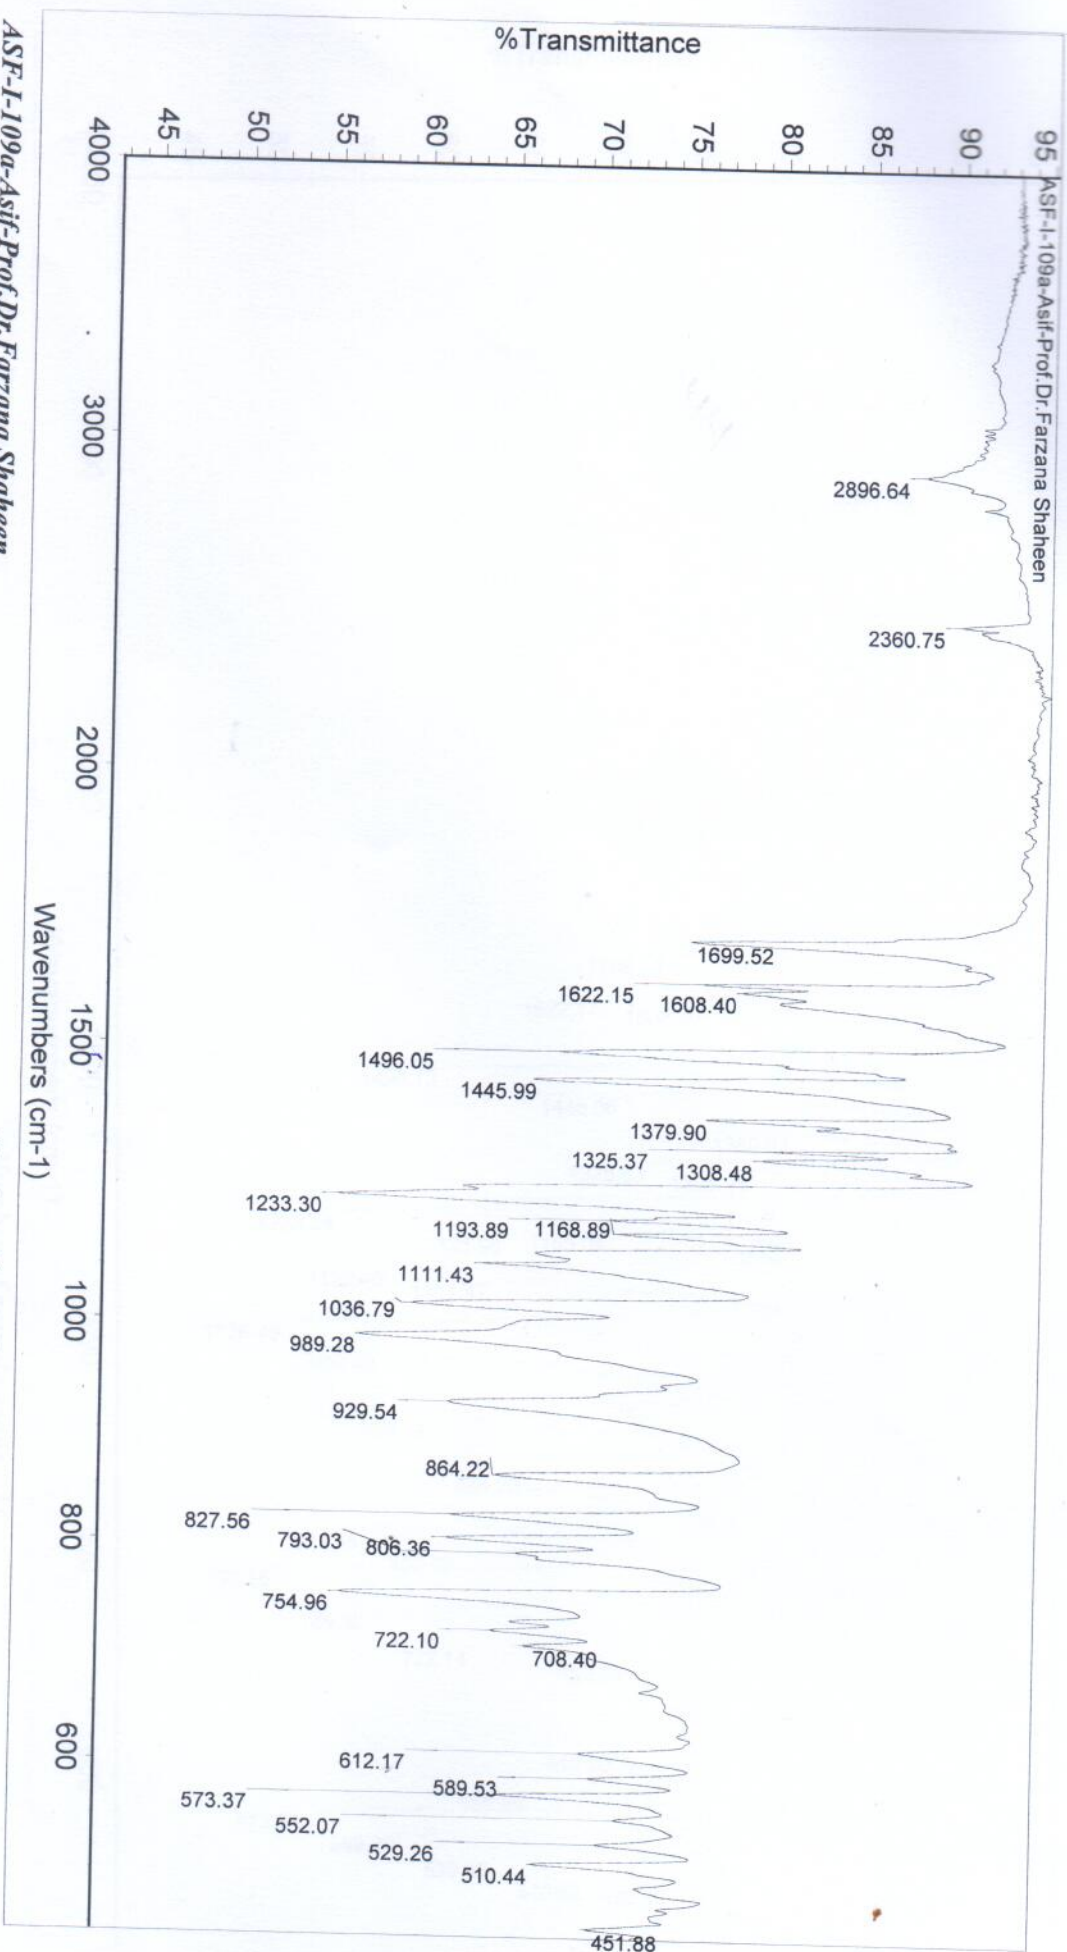

Analyst : Zubair  
Technique: FTIR-ATR

Number of sample scans: 16  
Number of background scans: 16  
Resolution: 4.000  
Sample gain: 1.0  
Optical velocity: 0.4747  
Aperture: 150.00

Tue Sep 24 15:54:21 2024 (C

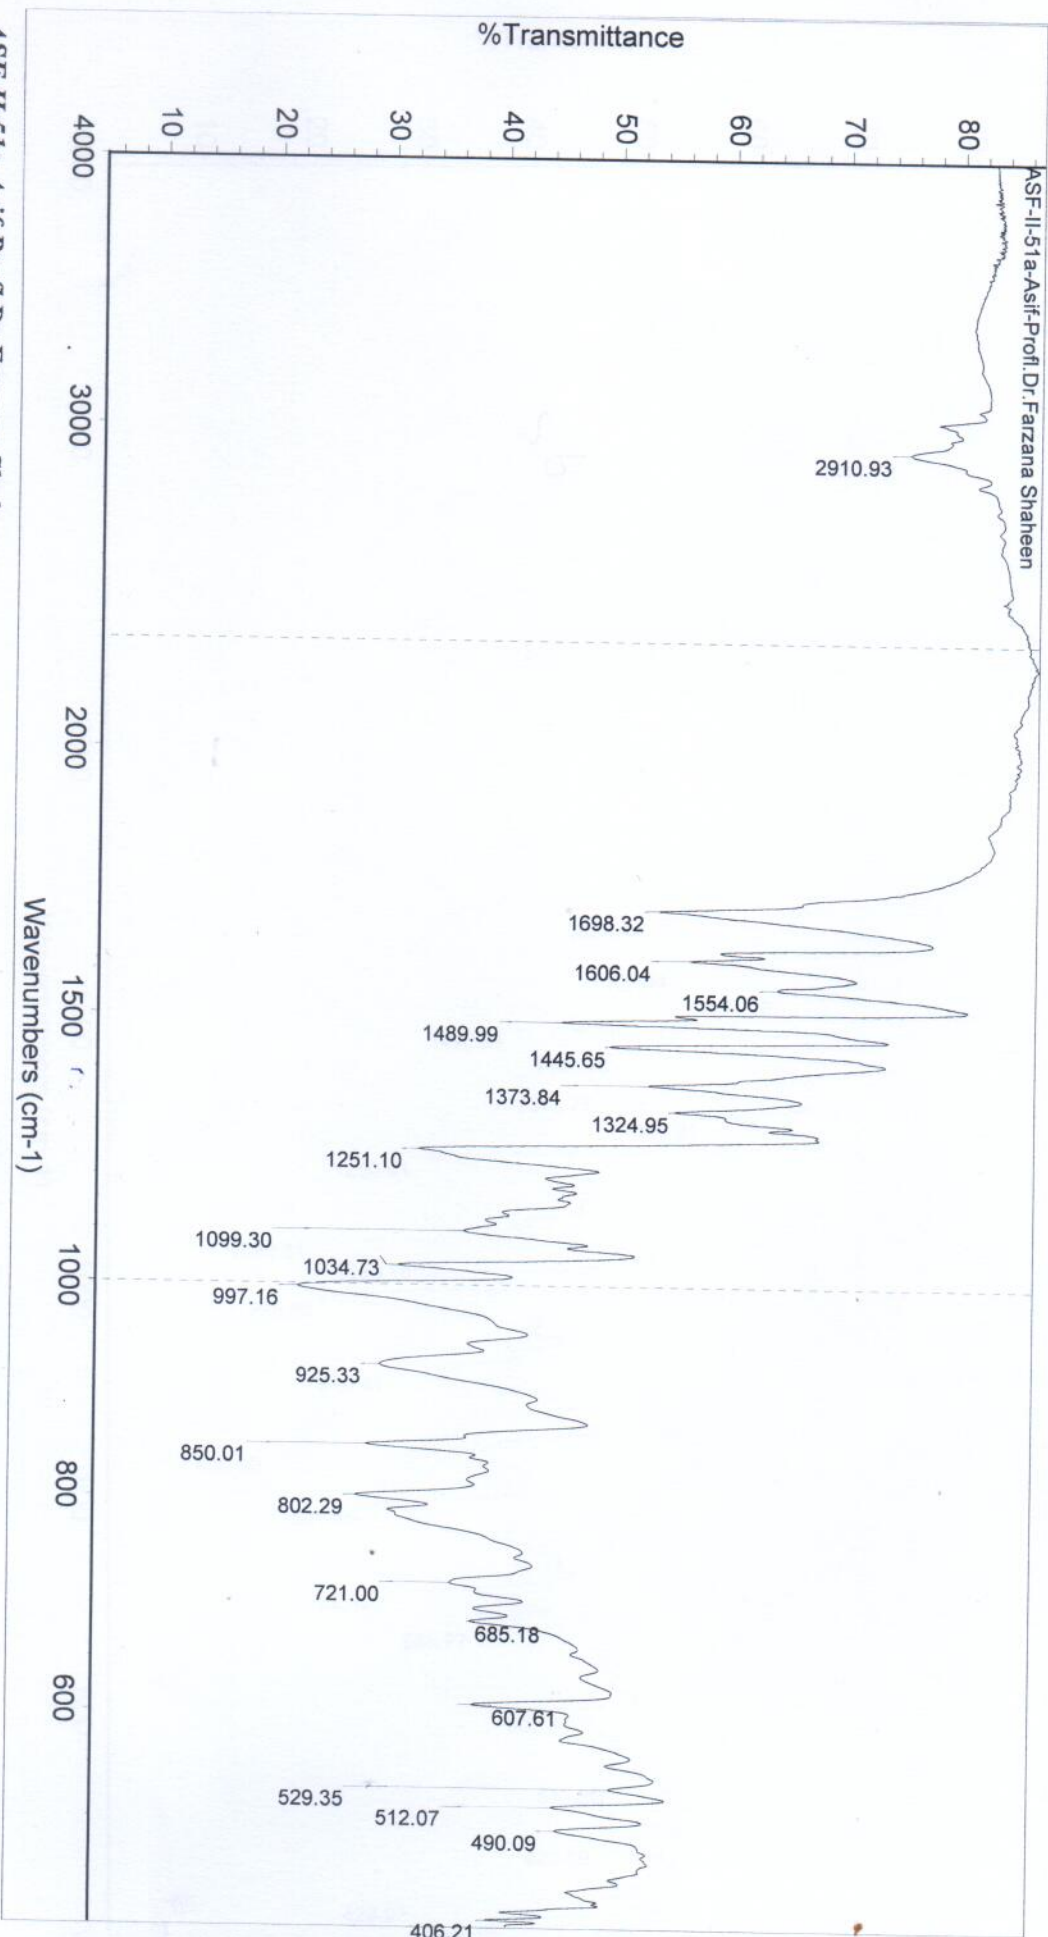

Analyst : ASF-II-51a-Asif-Profl. Dr. Farzana Shaheen

Technique: FTIR-ATR

Number of sample scans: 16

Number of background scans: 16

Resolution: 4.000

Sample gain: 1.0

Optical velocity: 0.4747

Aperture: 150.00

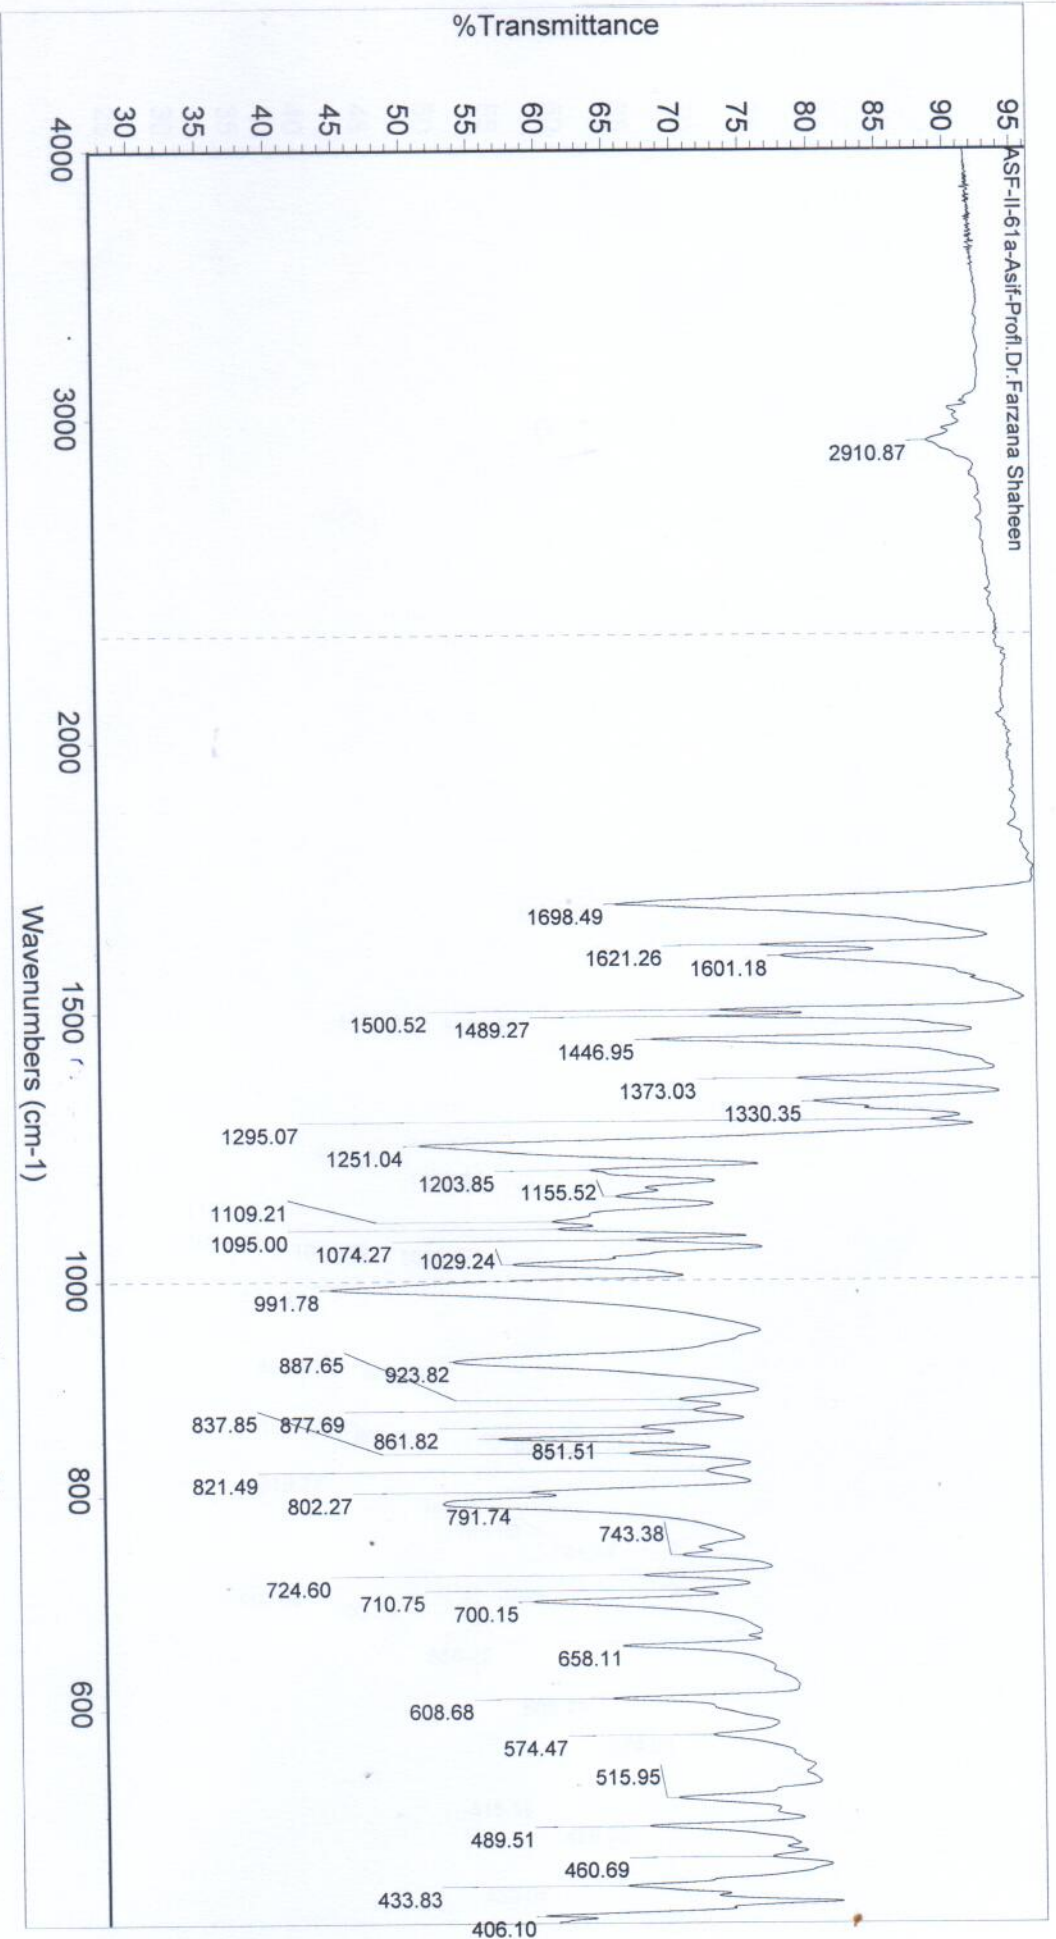

ASF-II-61a-Asif-Prof.I.Dr.Farzana Shaheen

Analyst : Asif

Technique: FTIR-ATR

Number of sample scans: 16

Number of background scans: 16

Resolution: 4.000

Sample gain: 1.0

Optical velocity: 0.4747

Aperture: 150.00

Wed Sep 25 15:06:28 2024 (

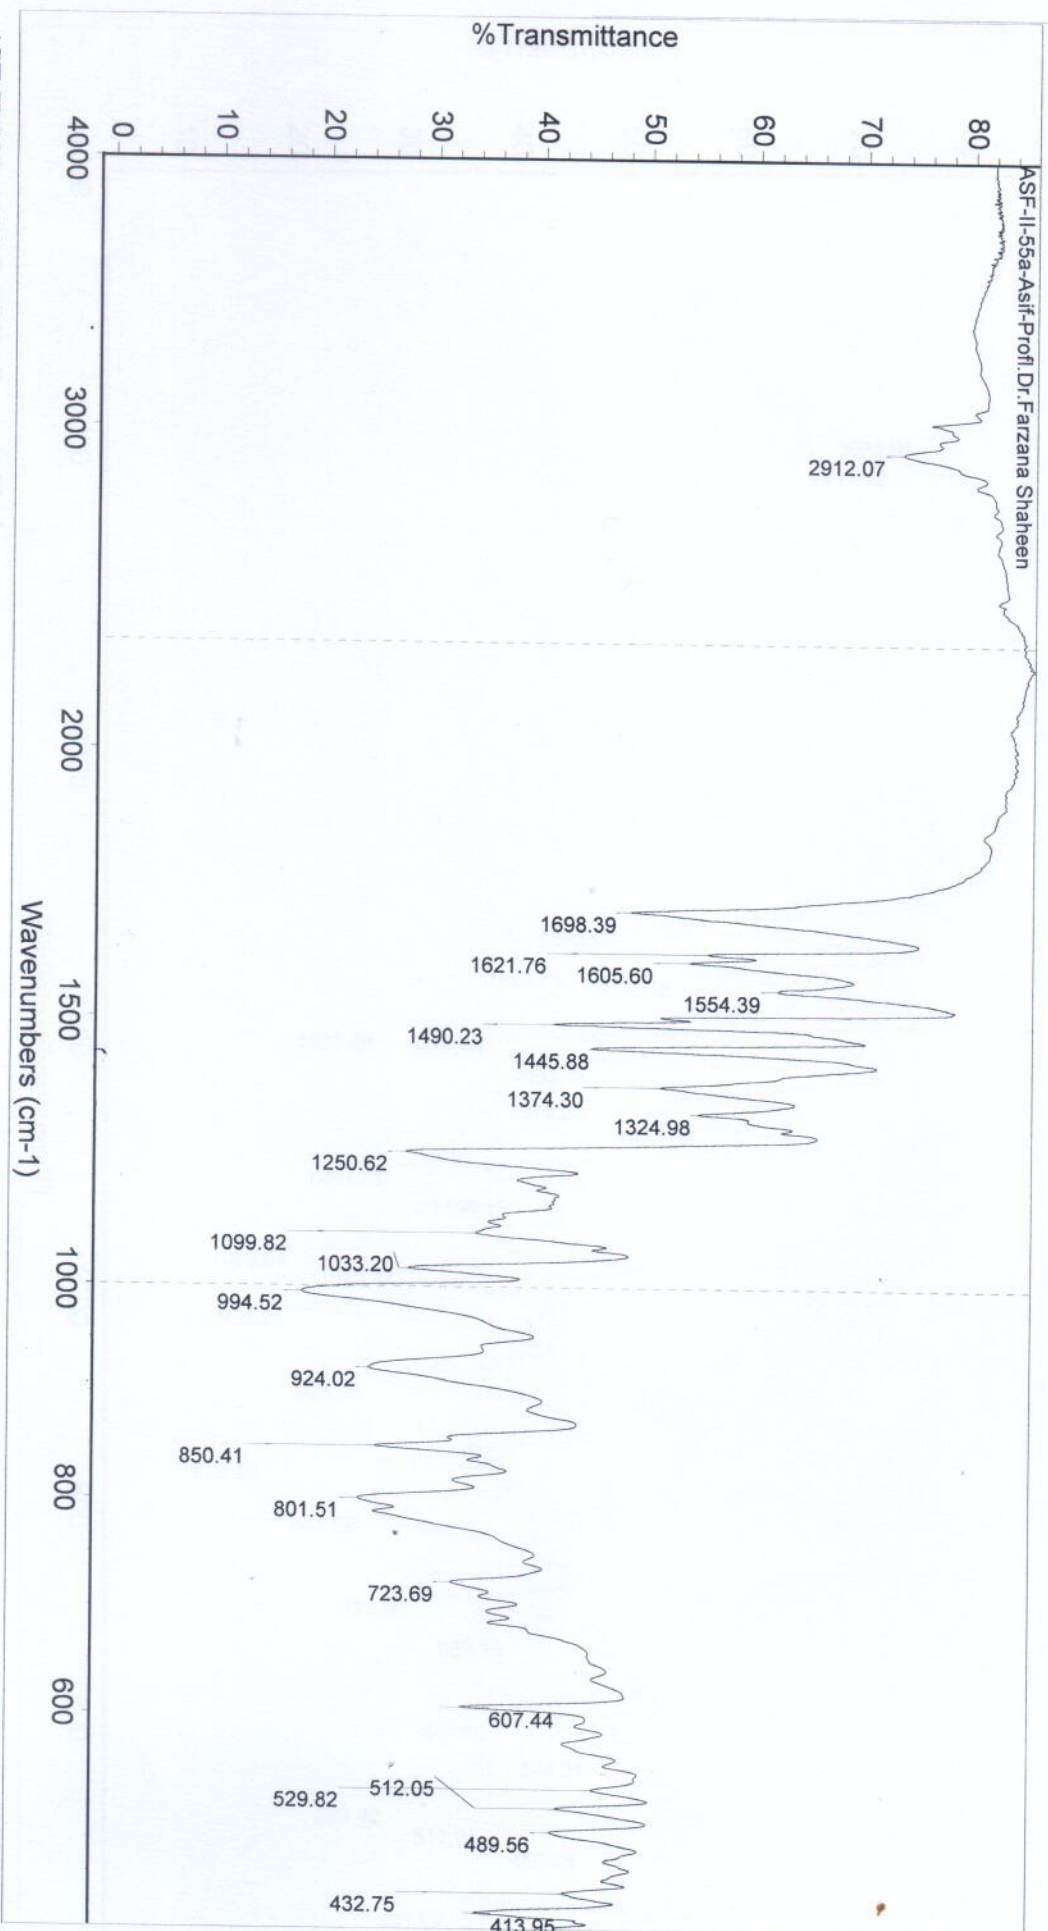

ASF-II-55a-Asif-Prof. Dr. Farzana Shaheen

Analyst : Zubair

Technique: FTIR-ATR

Number of sample scans: 16

Number of background scans: 16

Resolution: 4.000

Sample gain: 1.0

Optical velocity: 0.4747

Aperture: 150.00

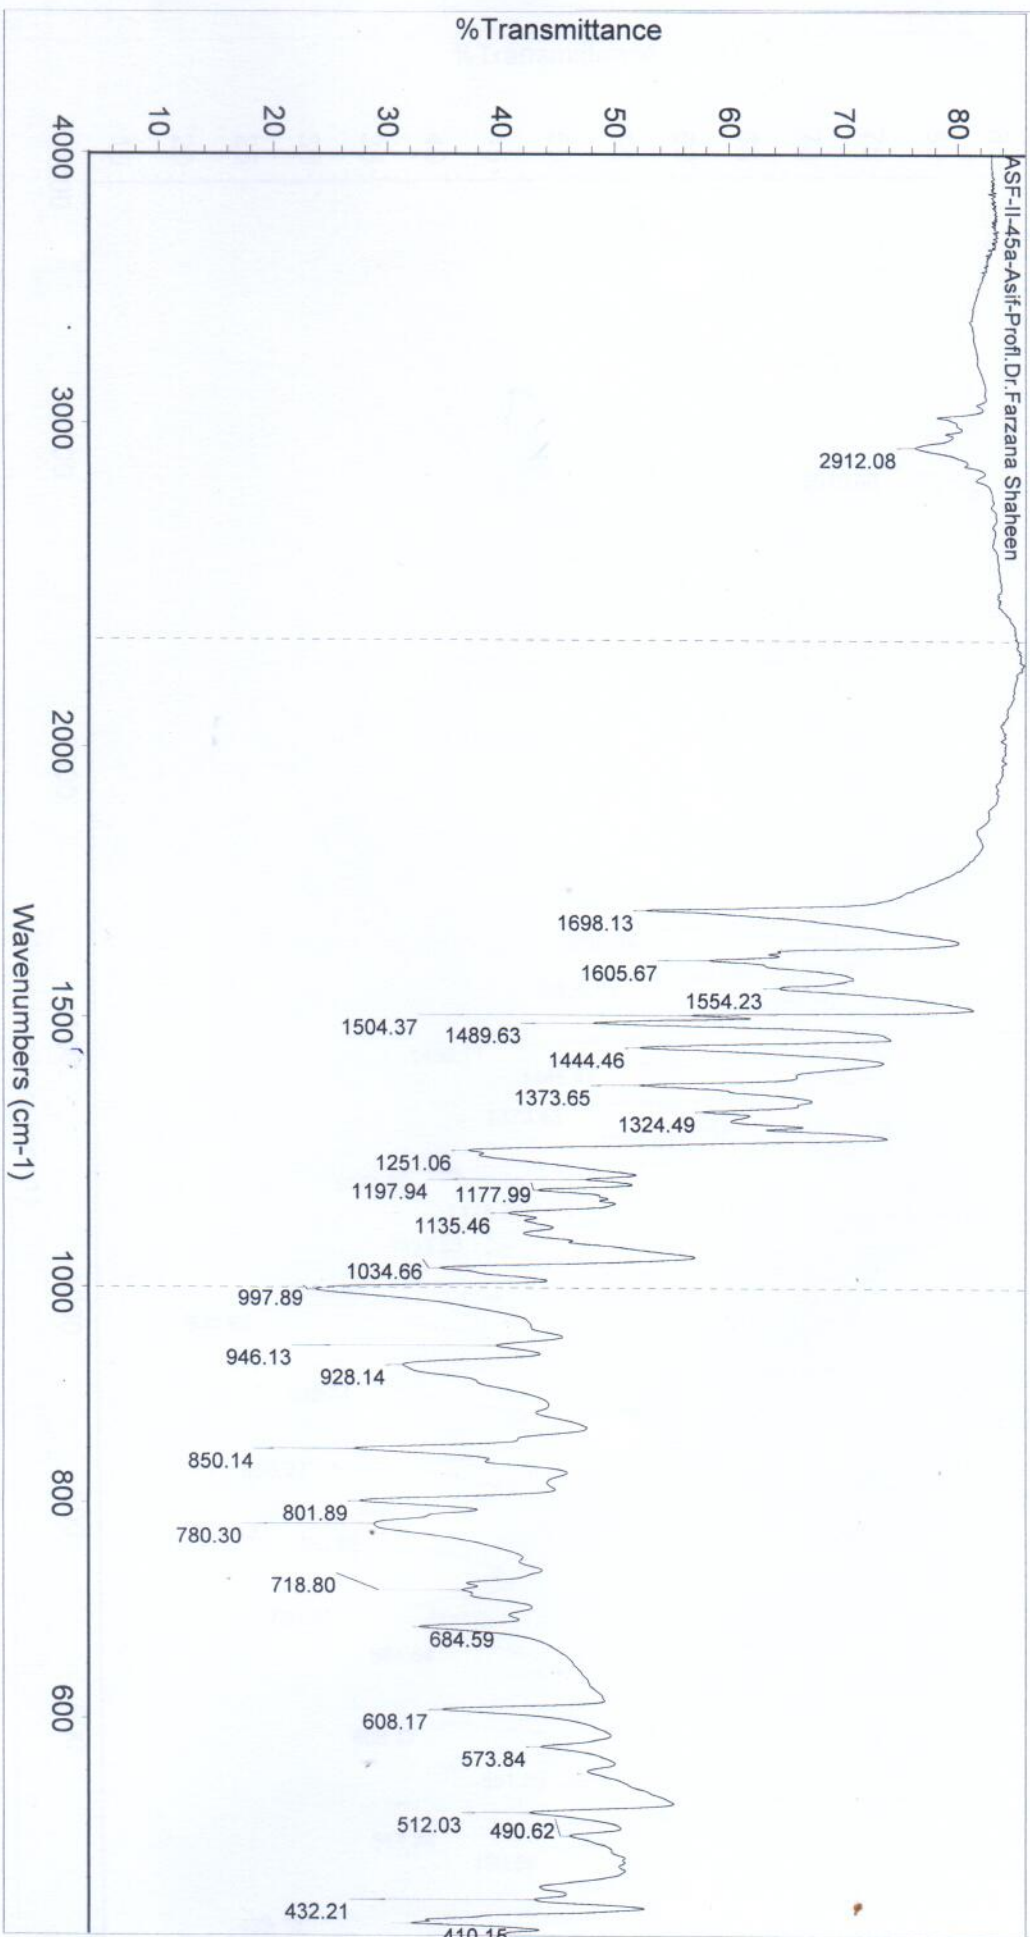

ASF-II-45a-Asif-Prof. Dr. Farzana Shaheen

Analyst : Asif

Technique: FTIR-ATR

Number of sample scans: 16

Number of background scans: 16

Resolution: 4.000

Sample gain: 1.0

Optical velocity: 0.4747

Aperture: 150.00

Wed Sep 25 14:52:21 2024 (

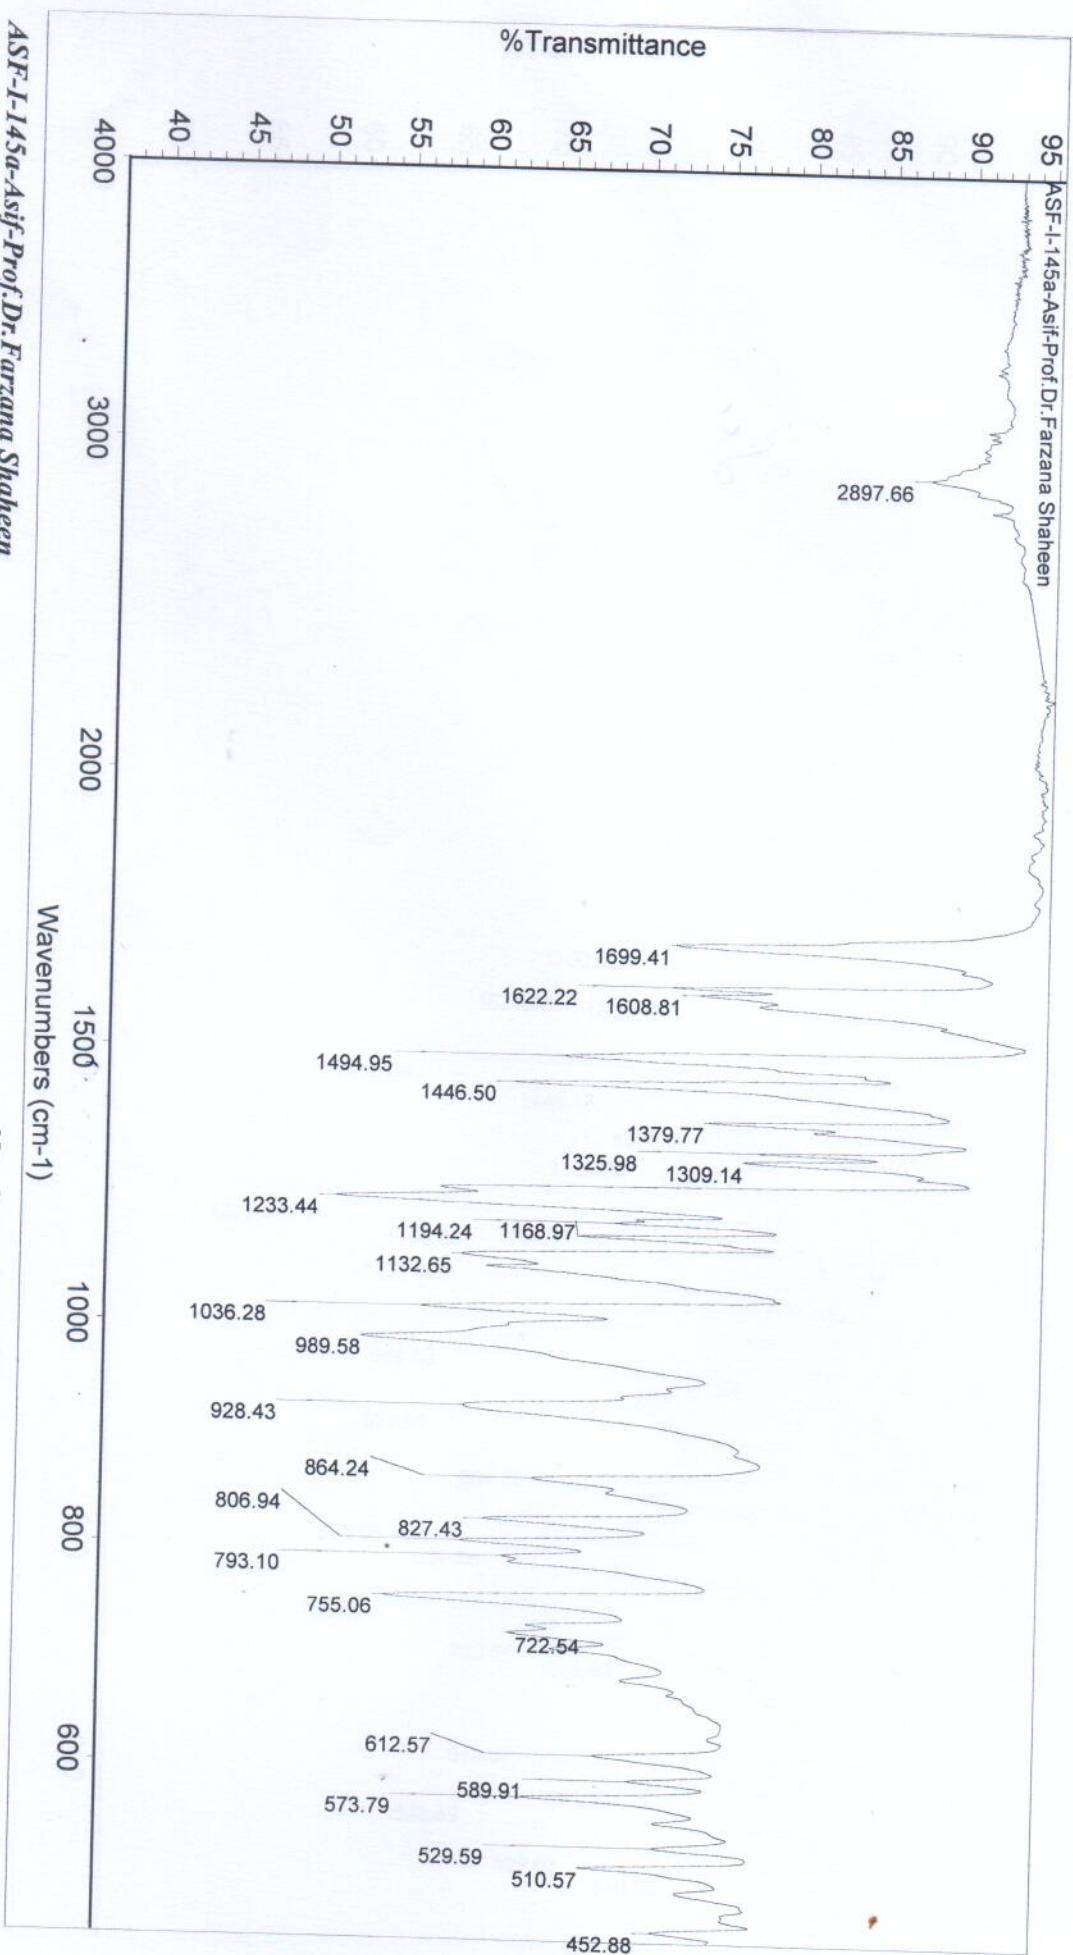

Analyst : Zubair

Technique: FTIR-ATR

ASF-I-145a-Asif-Prof. Dr. Farzana Shaheen

Number of sample scans: 16

Number of background scans: 16

Resolution: 4.000

Sample gain: 1.0

Optical velocity: 0.4747

Aperture: 150.00

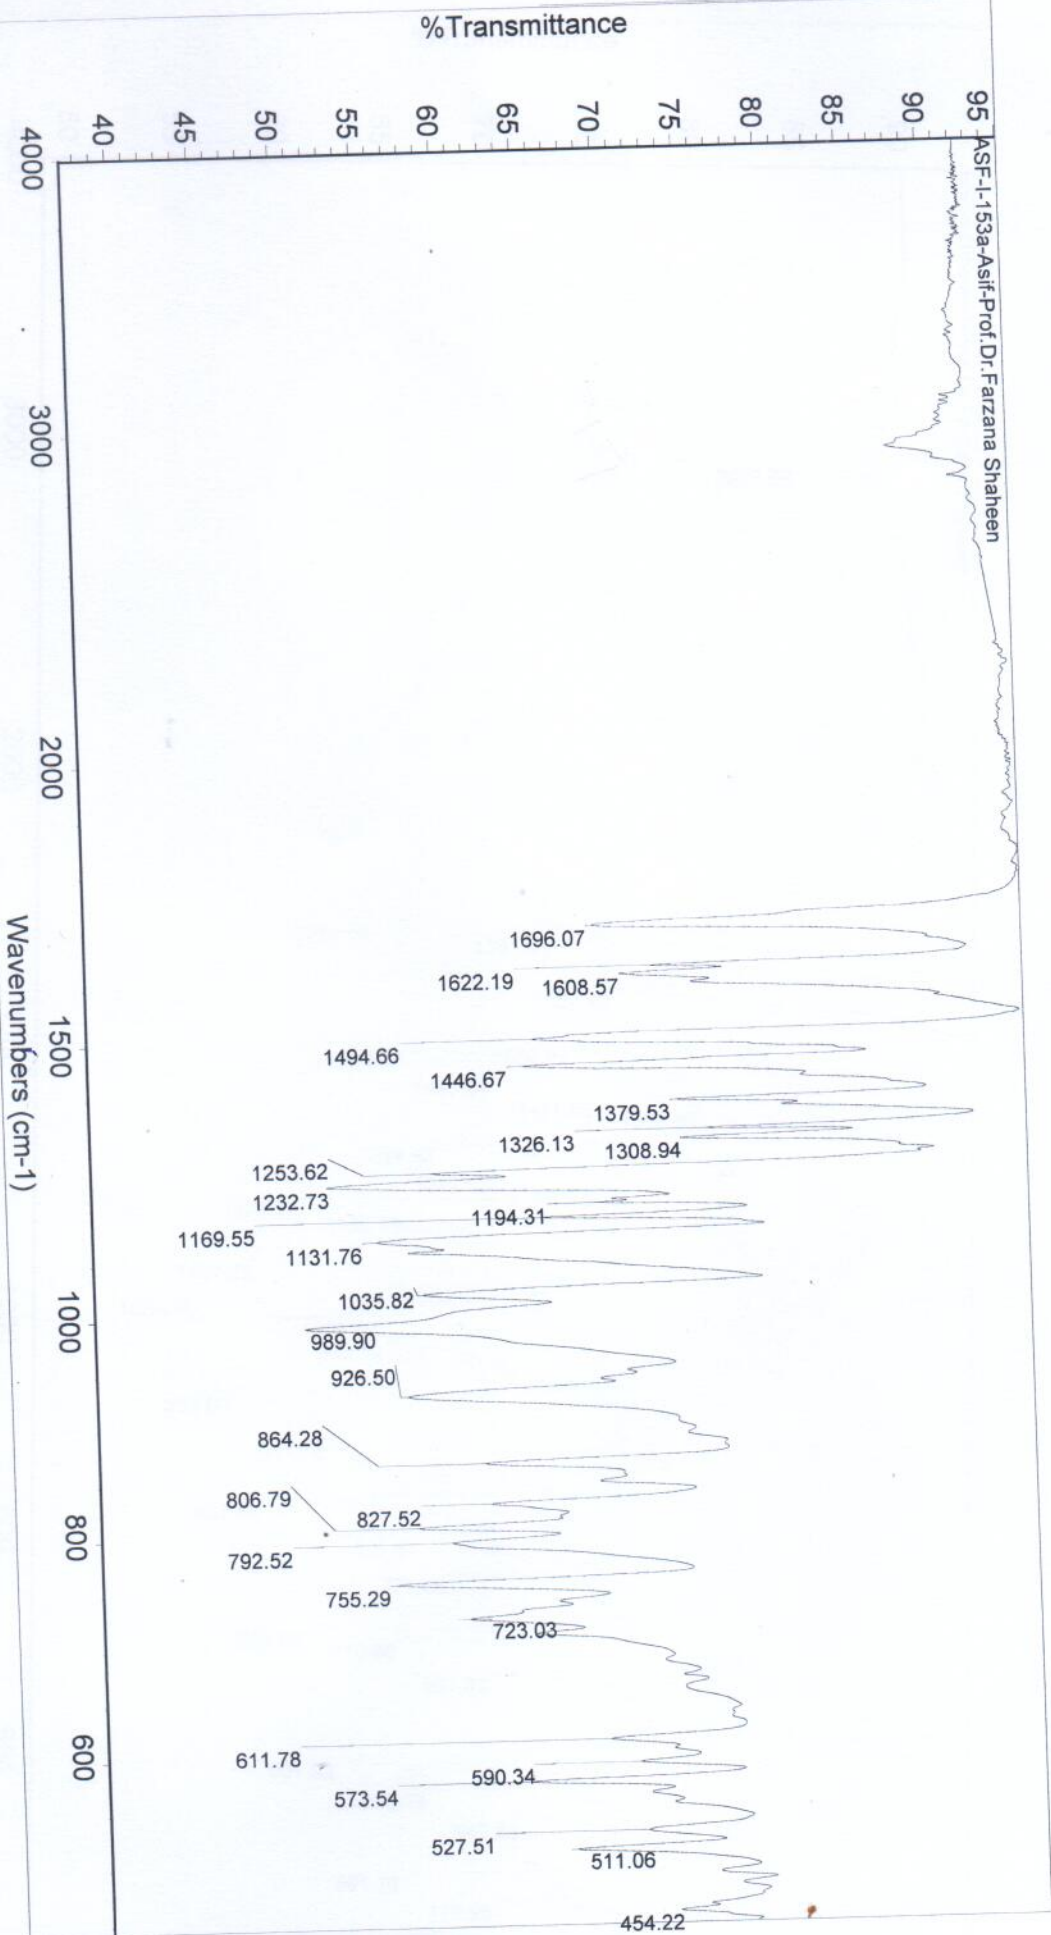

ASF-I-153a-Asif-Prof.Dr.Farzana Shaheen

Analyst : Zubair

Technique: FTIR-ATR

Number of sample scans: 16

Number of background scans: 16

Resolution: 4.000

Sample gain: 1.0

Optical velocity: 0.4747

Aperture: 150.00

Tue Sep 24 16:04:40 2024 (C

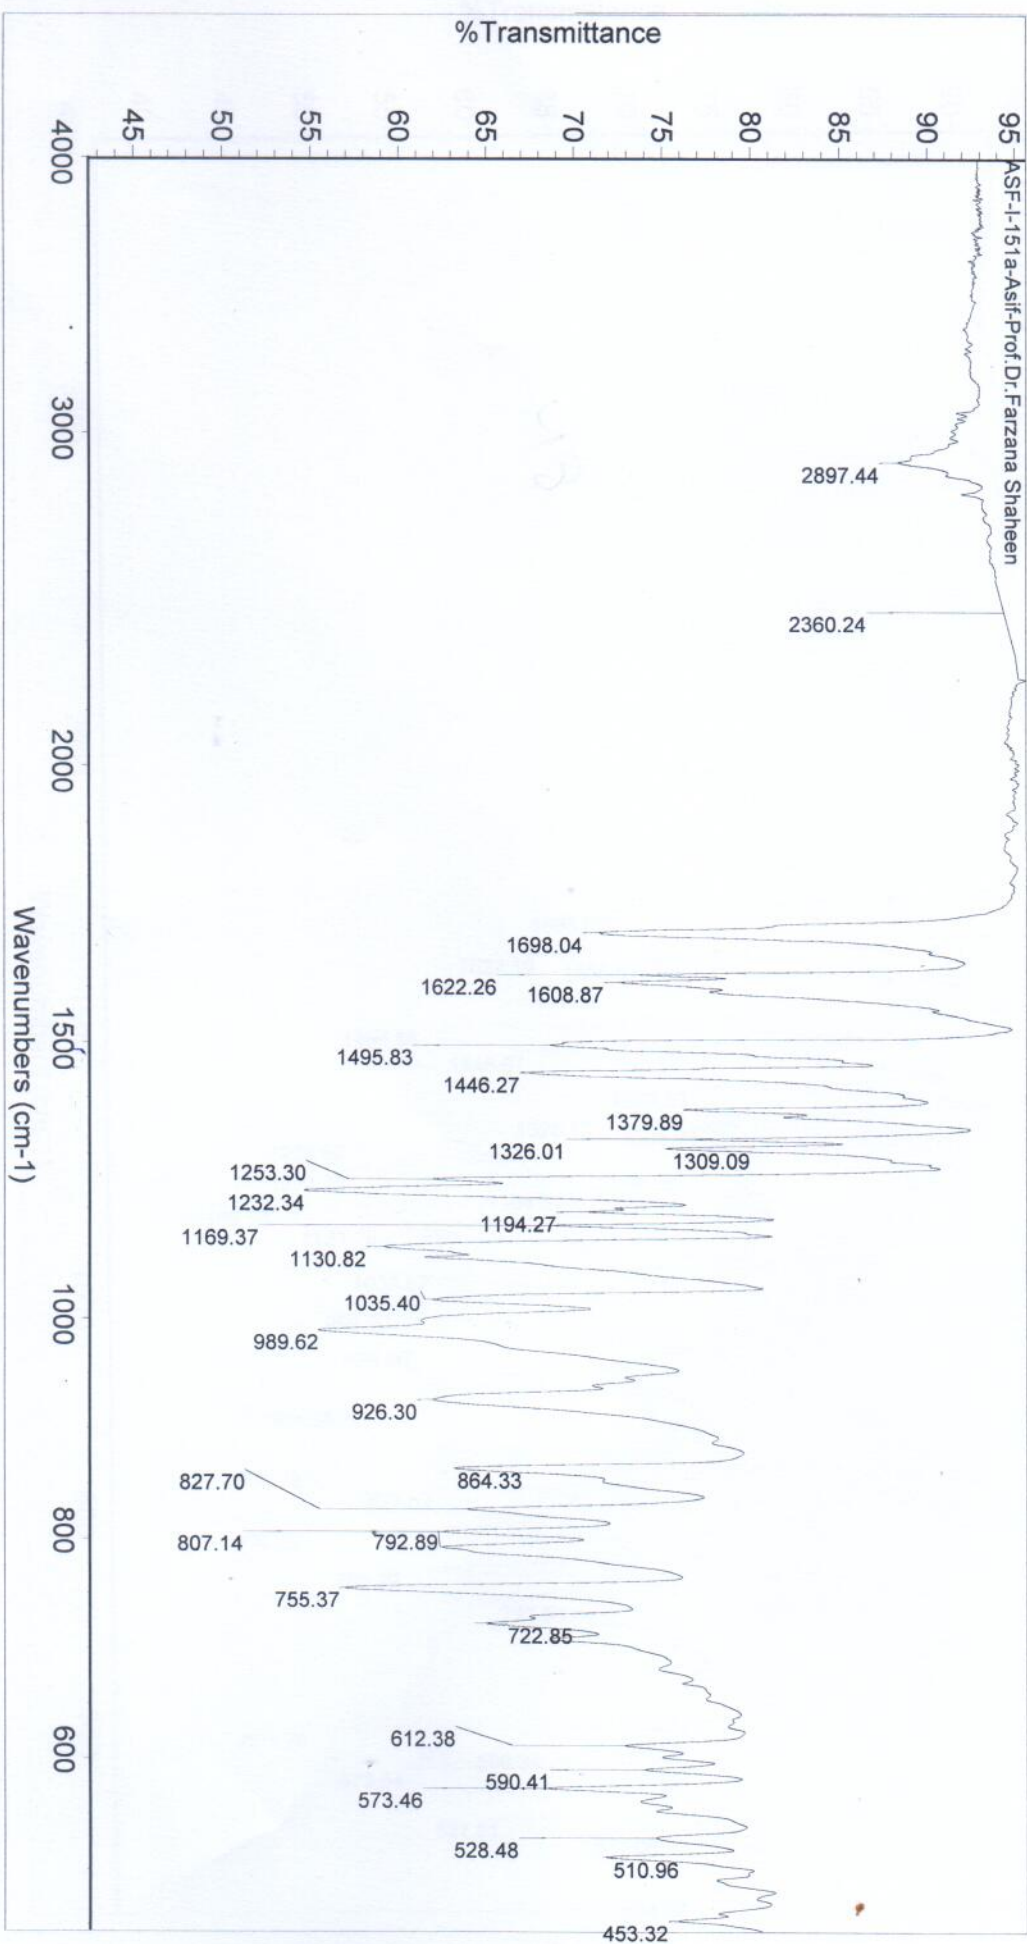

ASF-I-151a-Asif-Prof.Dr.Farzana Shaheen

Analyst : Zubair

Technique: FTIR-ATR

Number of sample scans: 16

Number of background scans: 16

Resolution: 4.000

Sample gain: 1.0

Optical velocity: 0.4747

Aperture: 150.00

Tue Sep 24 16:03:07 2024 (C

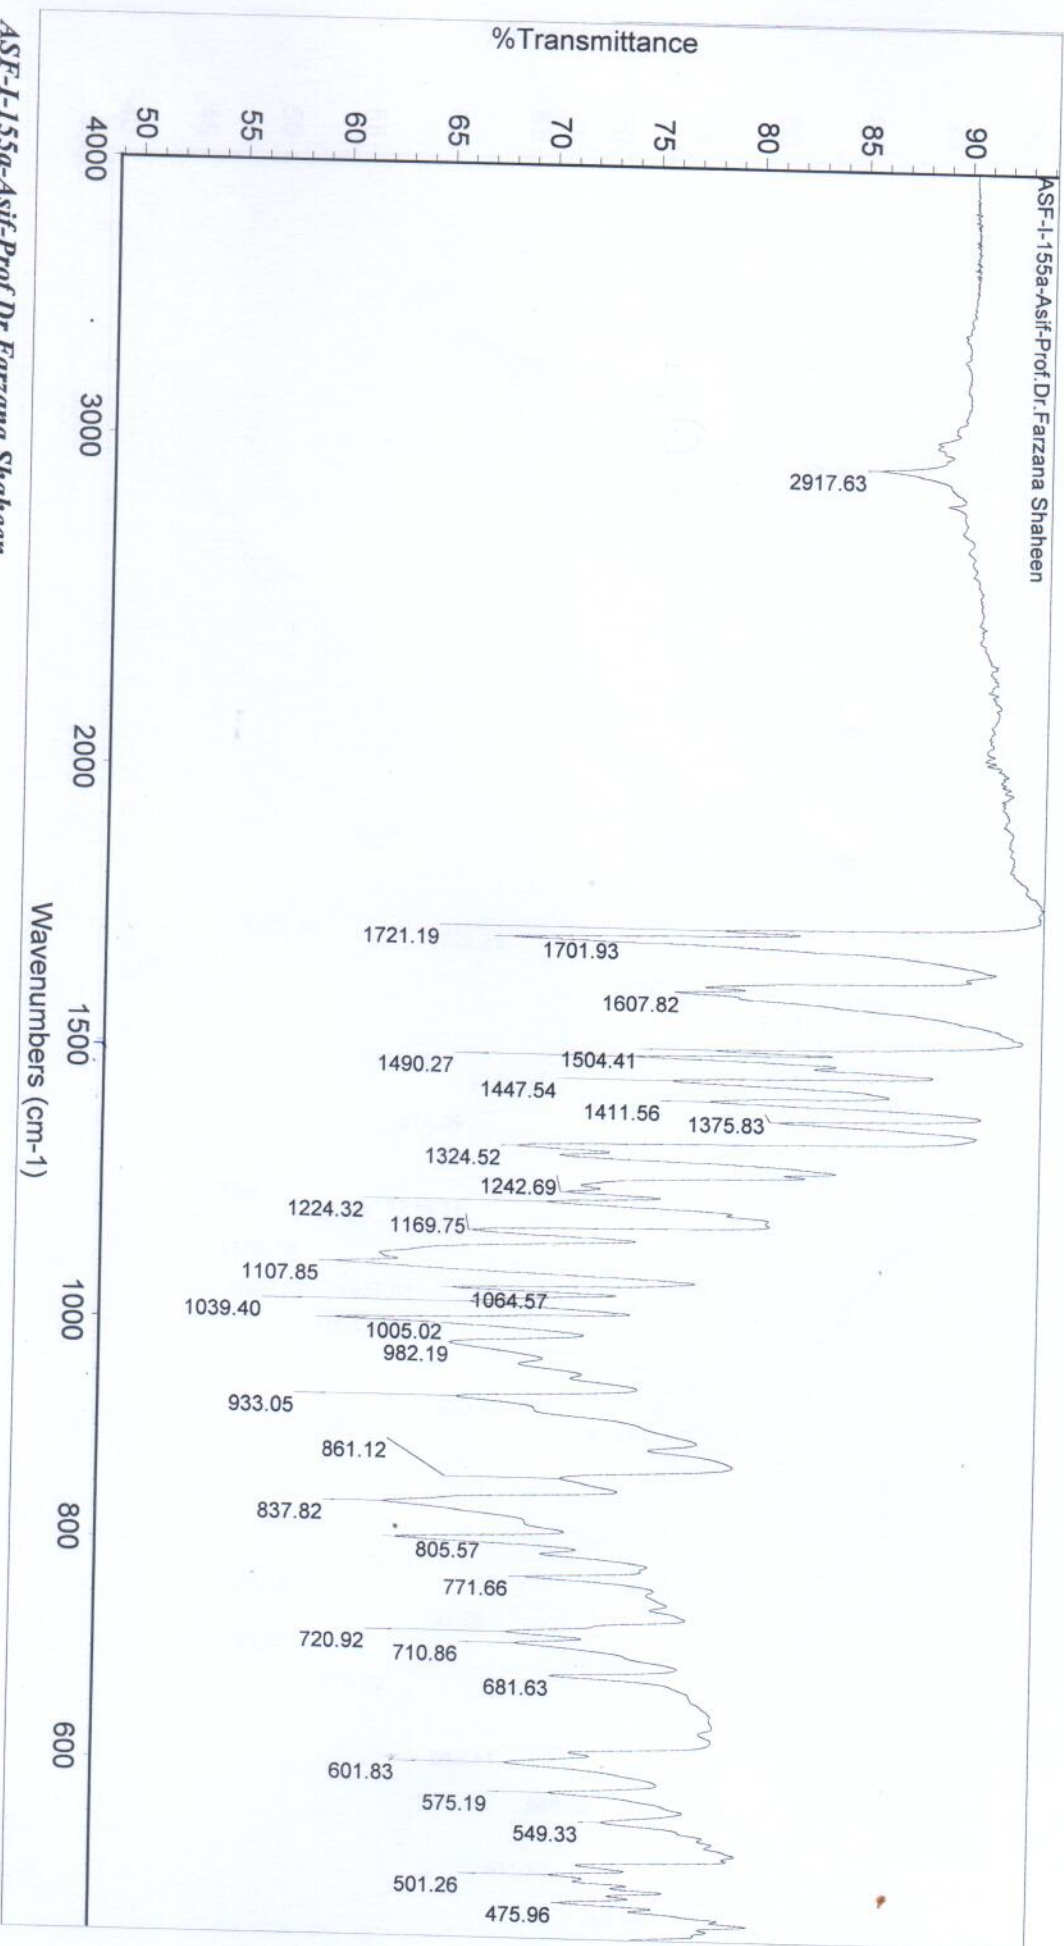

ASf-I-155a-Asif-Prof.Dr.Farzana Shaheen

Analyst : Asif

Technique: FTIR-ATR

Number of sample scans: 16

Number of background scans: 16

Resolution: 4.000

Sample gain: 1.0

Optical velocity: 0.4747

Aperture: 150.00

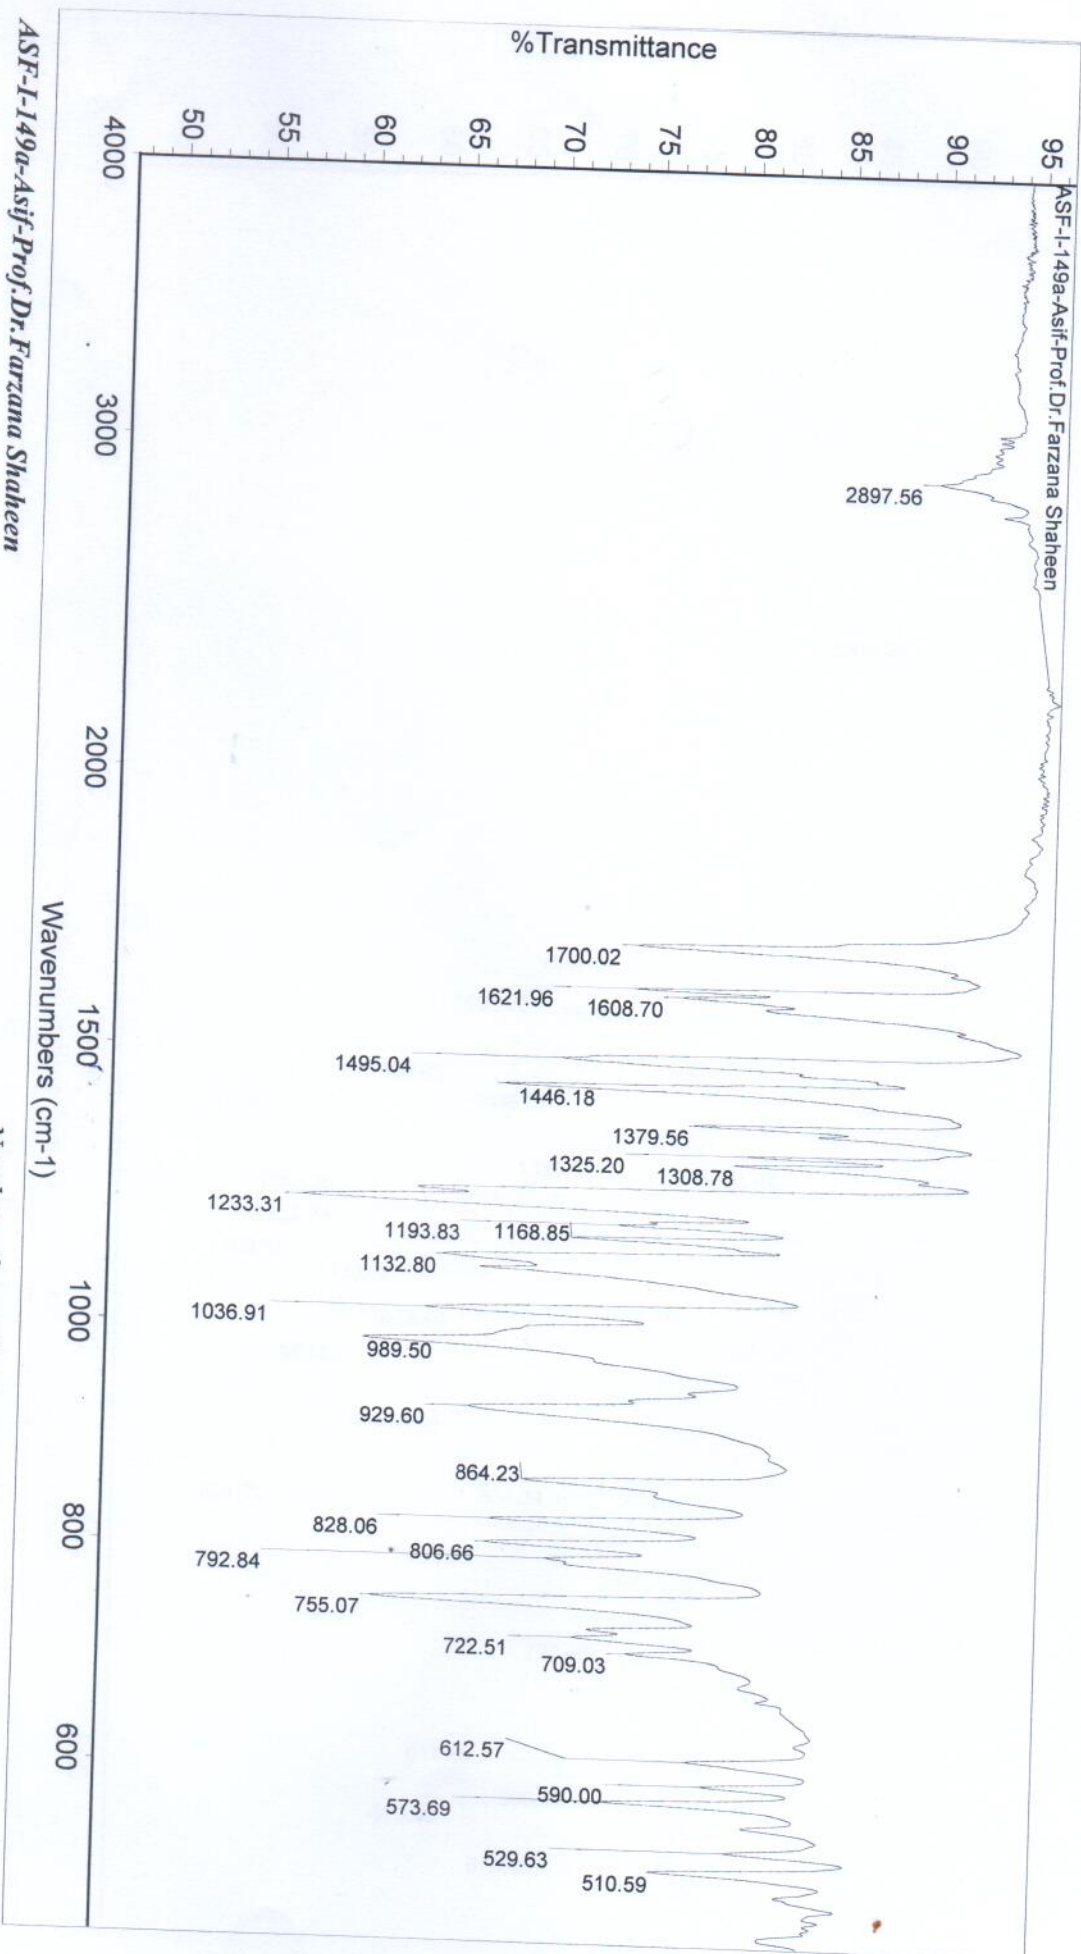

ASF-I-149a-Asif-Prof.Dr.Farzana Shaheen

Analyst : Asif

Technique: FTIR-ATR

Number of sample scans: 16

Number of background scans: 16

Resolution: 4.000

Sample gain: 1.0

Optical velocity: 0.4747

Aperture: 150.00

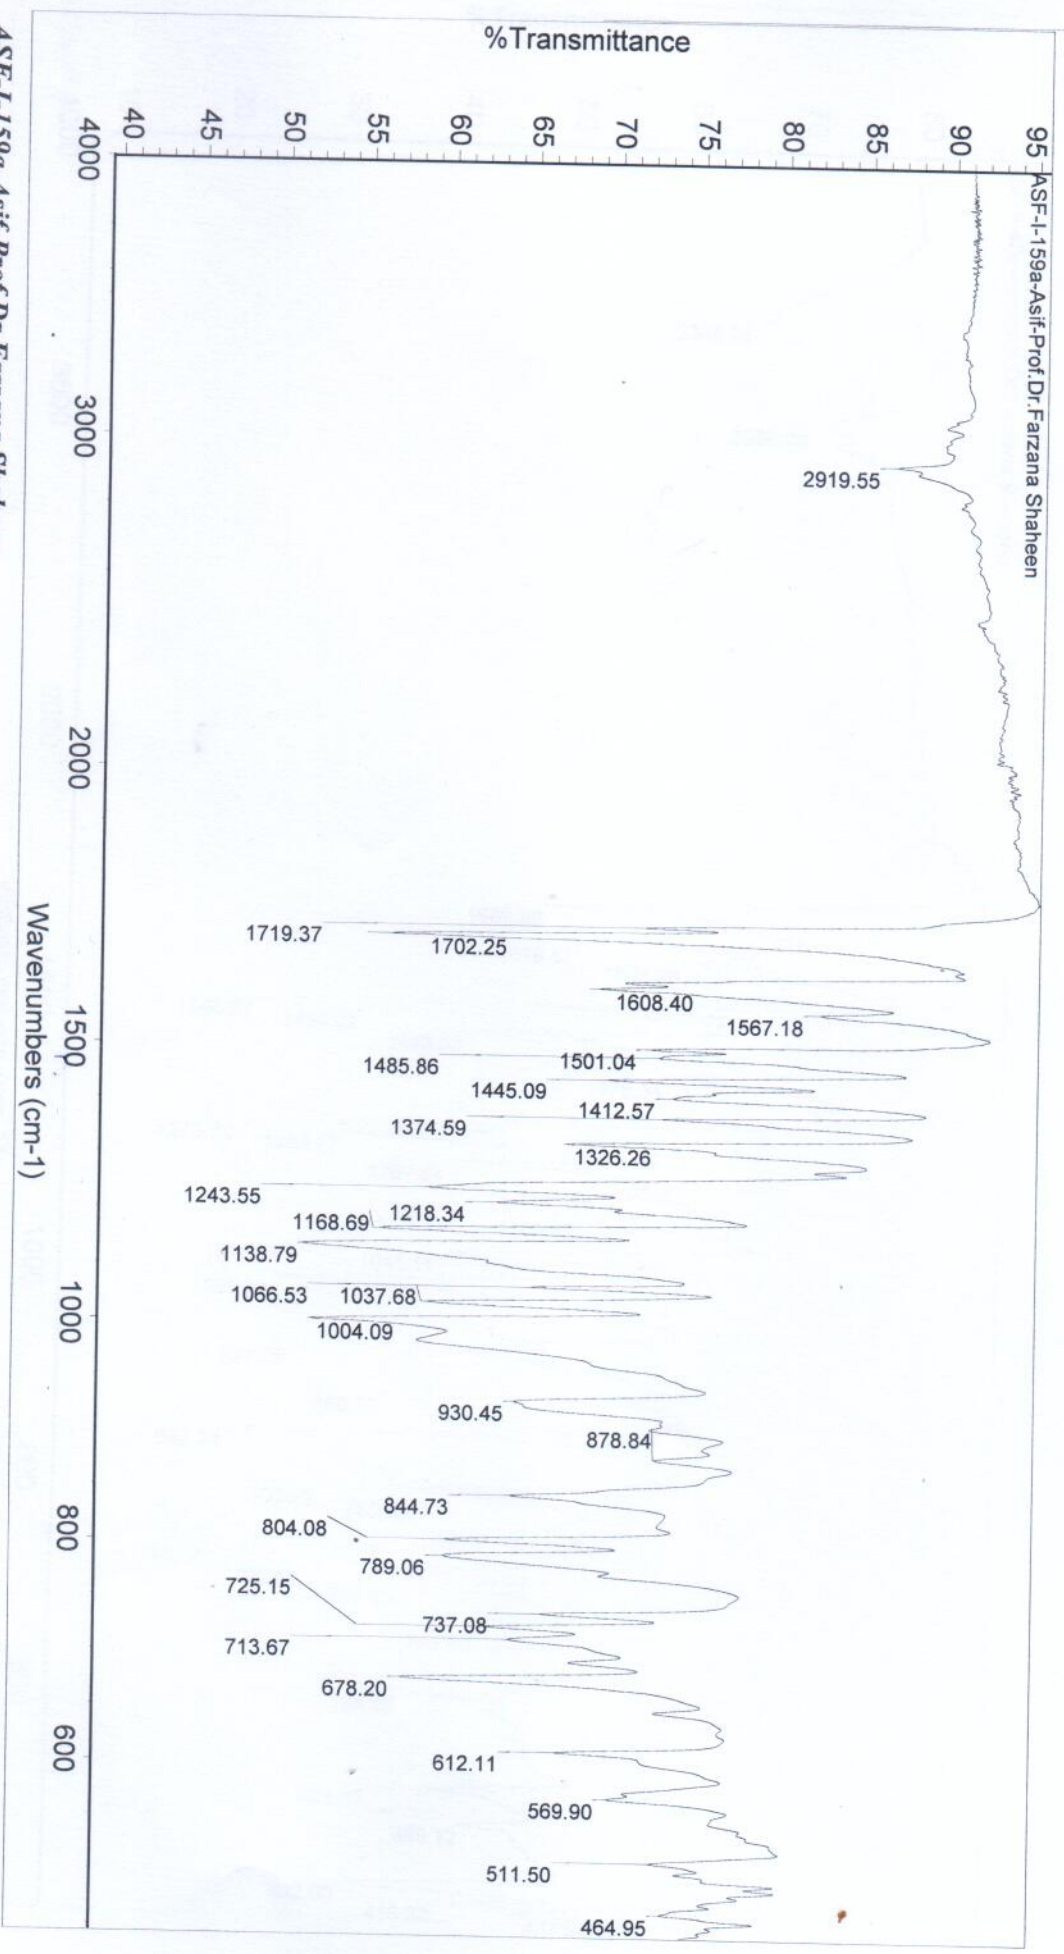

Analyst : Asif  
Technique: FTIR-ATR

Number of sample scans: 16  
Number of background scans: 16  
Resolution: 4.000  
Sample gain: 1.0  
Optical velocity: 0.4747  
Aperture: 150.00

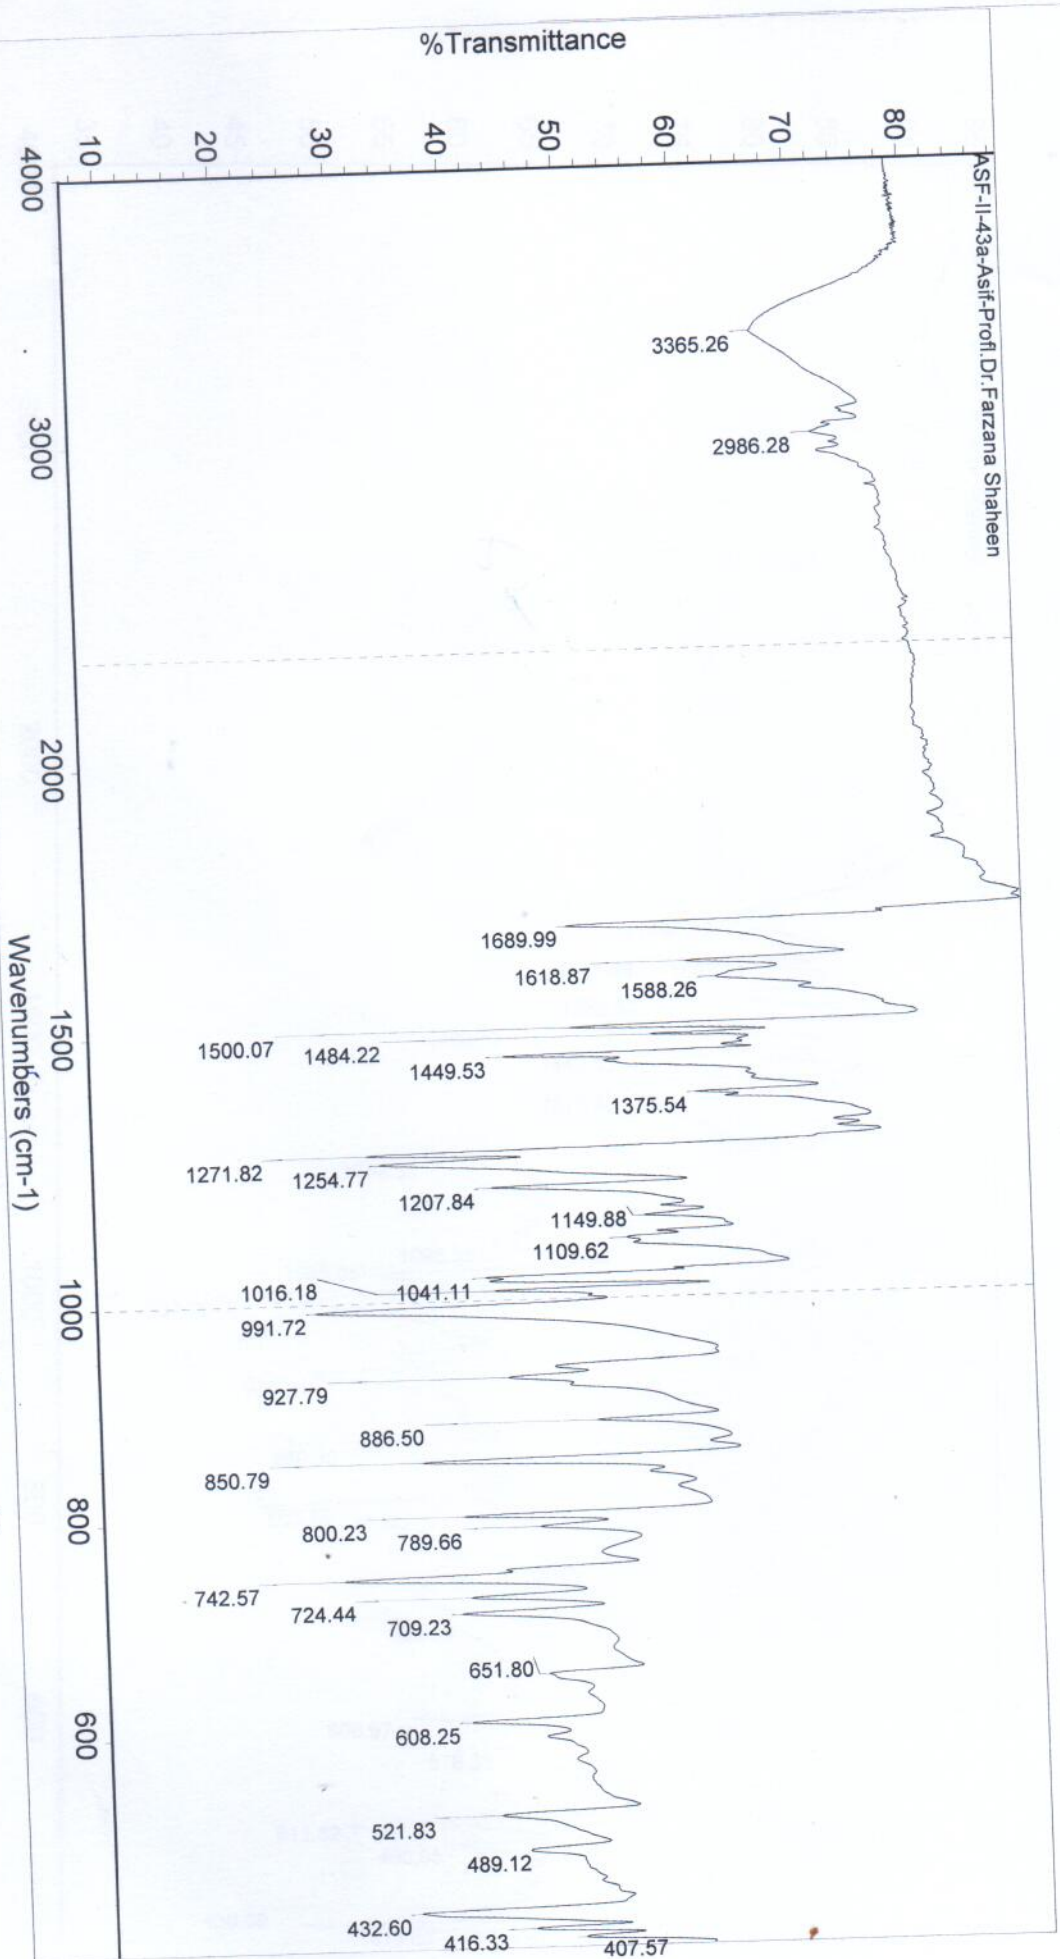

ASF-II-43a-Asif-Prof. Dr. Farzana Shaheen

Analyst : Zubair

Technique: FTIR-ATR

Number of sample scans: 16

Number of background scans: 16

Resolution: 4.000

Sample gain: 1.0

Optical velocity: 0.4747

Aperture: 150.00

Wed Sep 25 14:42:52 2024 (

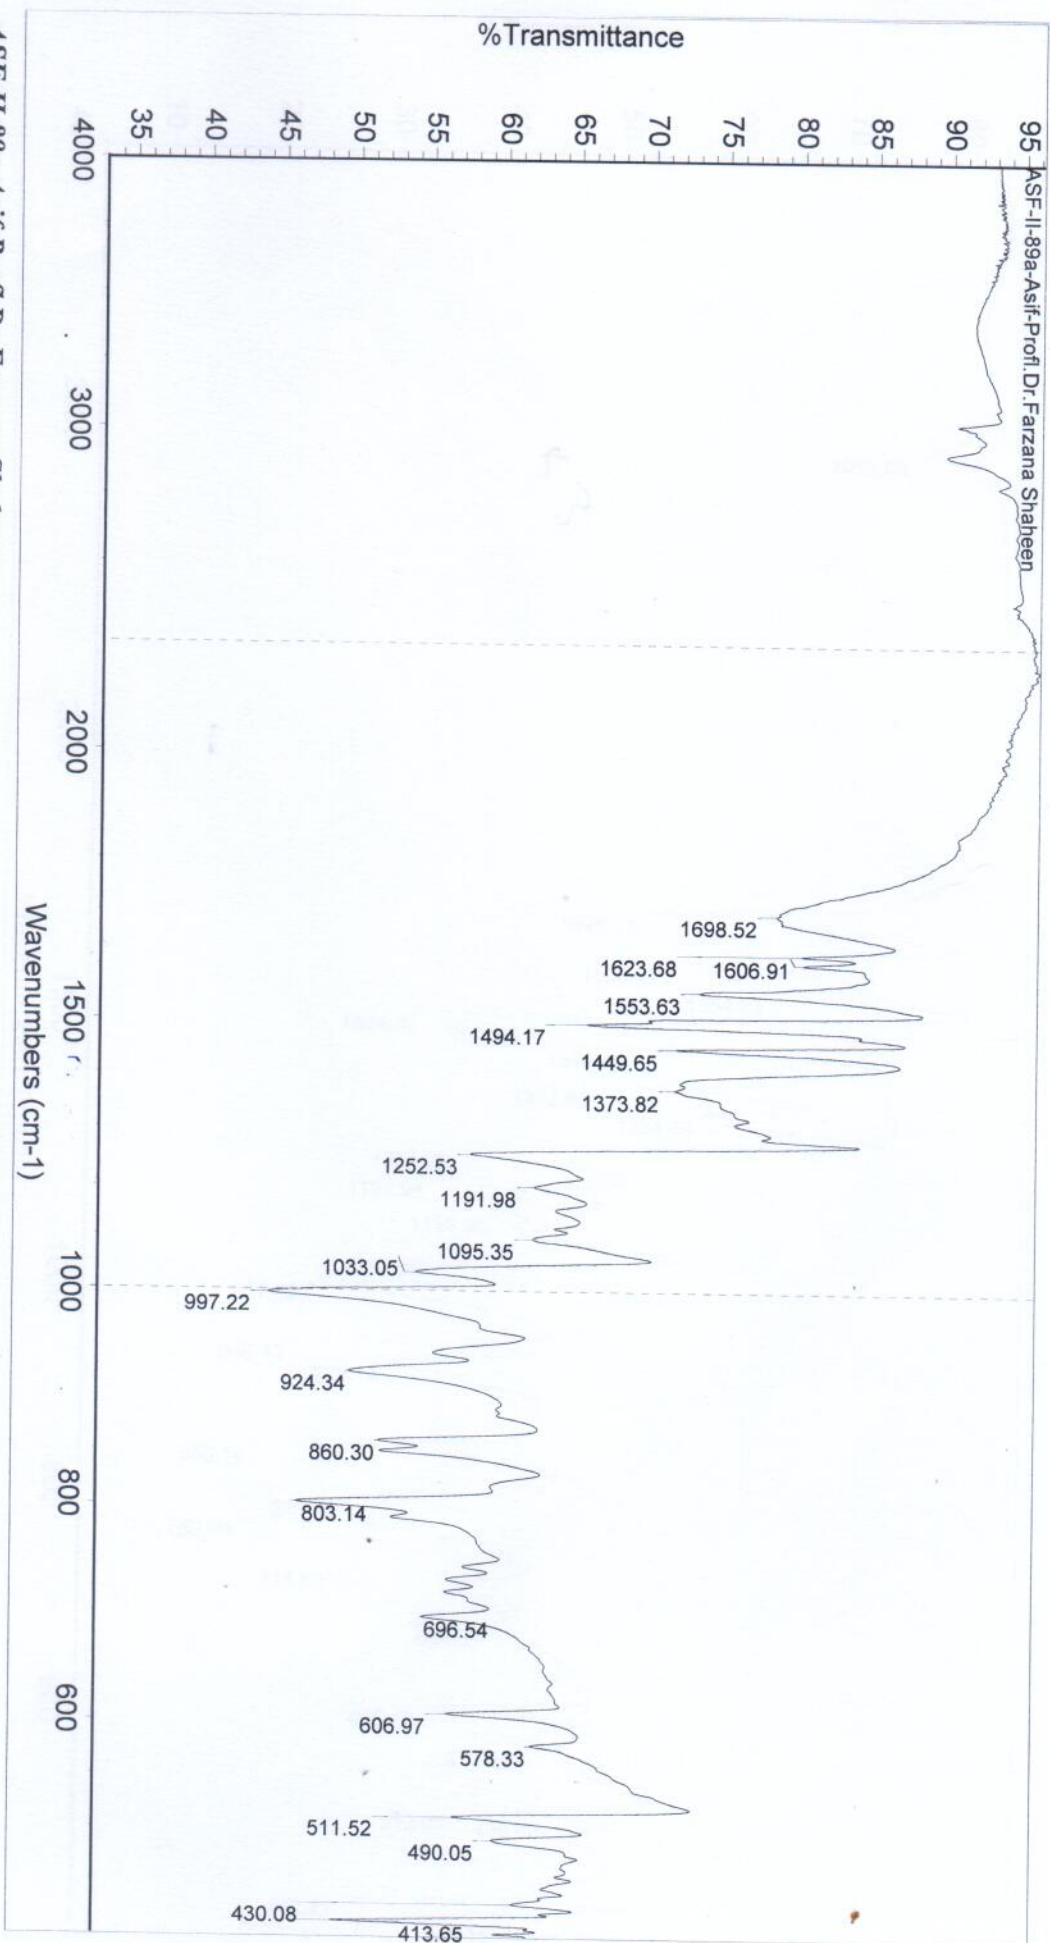

ASF-II-89a-Asif-Prof. Dr. Farzana Shaheen

Analyst : Asif

Technique: FTIR-ATR

Number of sample scans: 16

Number of background scans: 16

Resolution: 4.000

Sample gain: 1.0

Optical velocity: 0.4747

Aperture: 150.00
